# Supplementary material for: Utilization of methanol for condensation interrupted chemoselective transfer hydrogenation of CC, CO, and CN bonds under low catalyst loading
Source: Royal Society of Chemistry journal article supplement (doi:10.1039/d3qo00308f), 2023-01-01
Supplement: d3qo00308f1.pdf [file d3qo00308f1.pdf]

## Supporting Information

### **Utilization of methanol for condensation interrupted chemoselective transfer hydrogenation of C=C, C=O, and C=N bonds under low catalyst loading**

Anirban Sau, Divya Mahapatra, Sadhan Dey, Dibyajyoti Panja, Saghnik Saha and Sabuj Kundu\*

Department of Chemistry, Indian Institute of Technology Kanpur, Kanpur-208016, Uttar Pradesh (U.P.), India

\*Email: [sabuj@iitk.ac.in](mailto:sabuj@iitk.ac.in)

## Table of Contents

|                                                                               |           |
|-------------------------------------------------------------------------------|-----------|
| 1. General Consideration                                                      | S3        |
| 2. General Synthetic Procedures                                               | S3-S4     |
| 3. Preparative Scale Synthesis                                                | S5        |
| 4. Control Experiments                                                        | S5        |
| 5. Kinetic Studies                                                            | S6-S7     |
| 6. Hammett Studies                                                            | S7-S8     |
| 7. TH of Nitro-substituted Chalcone at Different Time Duration                | S9        |
| 8. Computational Studies                                                      | S9-S55    |
| 9. Spectral Data for the TH of $\alpha,\beta$ -Unsaturated Ketones and Imines | S55-S68   |
| 10. Copies of $^1\text{H}$ and $^{13}\text{C}$ NMR Spectra of Products        | S69-S139  |
| 11. References                                                                | S140-S143 |

## 1. General Consideration

**1.1 Reagent Information :** Unless otherwise stated, all the experiments were carried out under argon atmosphere using either argon filled Glove box or standard schlenk line technique. Glass apparatus were oven dried immediately prior to use. Solvents were dried according to the literature methods. Methanol was eventually distilled over sodium under argon atmosphere and deoxygenated prior to use. All the commercially available reagents were purchased from Sigma-Aldrich, Alfa-Aesar, TCI chemicals, SD-fine chemicals, Avra, Spectrochem.  $\text{IrCl}_3 \cdot \text{H}_2\text{O}$  (99% extrapure) was purchased from SRL, India. For column chromatography, silica gel was used unless otherwise stated. A gradient elution using hexane/ethyl acetate or ethyl acetate/methanol was performed, based on silica TLC plate.

**1.2 Analytical Information :**  $^1\text{H}$  and  $^{13}\text{C}$  spectra were recorded on JEOL 400 MHz, and 500 MHz Spectrometer using  $\text{CDCl}_3$ , and  $\text{DMSO}-d_6$ . All  $^1\text{H}$  NMR experiments were reported in parts per million (ppm) units and were measured relative to the signals for residual chloroform (7.24 ppm), and residual DMSO (2.5 ppm) in the deuterated solvent, unless otherwise stated and coupling constant ( $J$ ) was reported in hertz (Hz). All  $^1\text{H}$  decoupled  $^{13}\text{C}$  NMR spectra were reported in ppm relative to deuterated chloroform (77.1 ppm),  $\text{DMSO}-d_6$  (39.5). All the GC analysis were performed using Perkein Elmer Clarus 600 Gas Chromatograph and GC-MS were taken using Agilent 7890A Gas Chromatograph equipped with Agilent 5890 triple-quadrupole mass system.

## 2. General Synthetic Procedures

### 2.1 Procedure for Synthesis of Ligands and Metal Complexes

All the ligands and their corresponding metal complexes were synthesized following the procedures reported in the literature.<sup>1-3</sup>

### 2.2 Procedure for Synthesis of Cat. 9<sup>4</sup>

Cat. **9** was synthesized by starting [1,1'-biphenyl]-3,3'-diol (186.2 mg, 1mmol) with  $[\text{Ir}(\text{Cp}^*\text{Cl}_2)_2]$  (398.4 mg, 0.5 mmol) in methanol at room temperature for 24 h. Synthesized complex was characterized by  $^1\text{H}$  NMR,  $^{13}\text{C}$  NMR, and ESI-MS analysis.

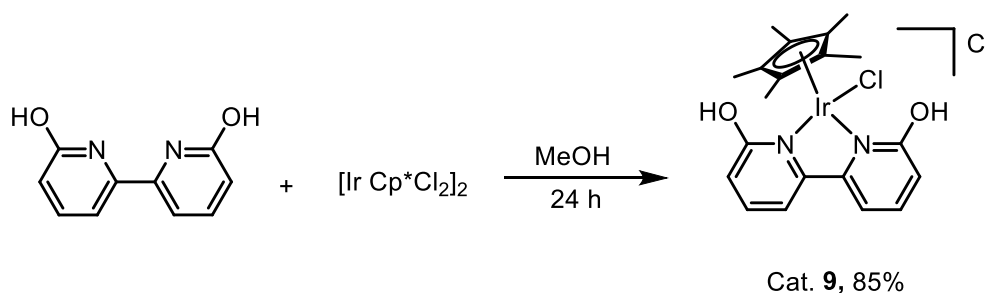

**Scheme S1** Synthesis of Cat. **9**

### 2.2 Synthesis of $\alpha,\beta$ -Unsaturated Ketone Derivatives:<sup>5</sup>

An oven dried 25 mL round bottom flask (RB) was charged with a magnetic stir-bar, aryl ketone derivative (1.0 mmol), and aldehyde derivative (1.0 mmol), followed by the addition of ethanol (5.0 mL). Then 10% aqueous solution of NaOH (1.5 equiv.) was added dropwise in the stirring solution under ice cold condition. The stirring was continued for 5 h. After completion of the reaction, the reaction mixture was cooled in refrigerator overnight and yellowish white precipitate was obtained. Then the precipitate was collected through filtration, and washed with ice cold water-ethanol mixture

until the pH of the filtrate becomes 7. Finally, the desired  $\alpha$ ,  $\beta$ -unsaturated ketone was purified through column chromatography (silica gel) using hexane-ethyl acetate as eluent. All the substrates were characterized by GC-MS analysis and  $^1\text{H}$  NMR spectroscopy.

## **2.3 Transfer Hydrogenation of C=C, C=O and C=N bonds:**

### **2.3.1 Optimization for Transfer Hydrogenation of C=C Bond in Chalcones:**

An oven dried 4 mL screw cap tube was taken inside the argon filled glove box and charged with a magnetic stir-bar, chalcone **1a** (20.80 mg, 0.10 mmol), Cat. **6** (0.05 - 0.10 mol%), and CsOH.H<sub>2</sub>O (3-4 mol%), followed by the addition of methanol (0.7 mL). Then, the tube was sealed and placed in a preheated oil bath at 70-80 °C (oil bath temperature) for 3-4 h. After completion of the reaction, the tube was allowed to cool at room temperature. Then, 25  $\mu\text{L}$  reaction mixture was syringed out and filtered through a small plug of silica and subjected for GC analysis using mesitylene as internal standard to determine conversion and yield of the product.

### **2.3.2 Synthesis of Saturated Ketones from $\alpha$ , $\beta$ -Unsaturated Ketone Derivatives:**

An oven dried 9 mL screw cap tube was taken inside the argon filled glove box and charged with a magnetic stir-bar,  $\alpha$ , $\beta$ -unsaturated ketone (**Xa**) (0.50 mmol), Cat. **6** (0.10 - 0.20 mol%), and CsOH.H<sub>2</sub>O (4-8 mol%), followed by the addition of methanol (3.5 mL). Then, the tube was sealed and placed in a preheated oil bath at 80 °C (oil bath temperature) for 4 h. After completion of the reaction, the tube was allowed to cool at room temperature. Then, the solvent was evaporated and the crude residue was purified by silica gel column chromatography using hexane-ethyl acetate as eluent which afforded the desired product.

### **2.3.3 Optimization for Double Transfer Hydrogenation of C=C and C=O Bonds in Chalcones:**

An oven dried 4 mL screw cap tube was taken inside the argon filled glove box and charged with a magnetic stir-bar, chalcone **1a** (20.80 mg, 0.10 mmol), Cat. **6** (0.05 - 0.10 mol%), and base (4-20 mol%), followed by the addition of methanol (0.7 mL) or MeOH/H<sub>2</sub>O mixture. Then, the tube was sealed and placed in a preheated oil bath at 80-90 °C (oil bath temperature) for 3-12 h. After completion of the reaction, the tube was allowed to cool at room temperature. Then, the reaction mixture was subjected for  $^1\text{H}$  NMR analysis using 1,3,5-trimethoxybenzene as internal standard to determine conversion and yield of the product.

### **2.3.4 Synthesis of Alcohols from $\alpha$ , $\beta$ -Unsaturated Ketone Derivatives:**

An oven dried 9 mL screw cap tube was taken inside the argon filled glove box and charged with a magnetic stir-bar,  $\alpha$ , $\beta$ -unsaturated ketone (**Xa**) (0.50 mmol), Cat. **6** (0.50 mol%), and NaOAc (20 mol%), followed by the addition of MeOH/H<sub>2</sub>O in 13:1 ratio (3.5 mL). Then, the tube was sealed and placed in a preheated oil bath at 90 °C (oil bath temperature) for 12 h. After completion of the reaction, the tube was allowed to cool at room temperature. Then, the solvent was evaporated, and the crude residue was purified by silica gel column chromatography using hexane-ethyl acetate as eluent which afforded the desired product.

### **2.3.5 Optimization for Transfer Hydrogenation of Imines:**

An oven dried 4 mL screw cap tube was taken inside the argon filled glove box and charged with a magnetic stir-bar, N-benzyl-1-phenylmethanimine **59a** (19.50 mg, 0.10 mmol), Cat. **6** (0.10 - 0.30 mol%), and Cs<sub>2</sub>CO<sub>3</sub> (4-6 mol%), followed by the addition of methanol (0.7 mL). Then, the tube was

sealed and placed in a preheated oil bath at 80 °C (oil bath temperature) for 3 h. After completion of the reaction, the tube was allowed to cool at room temperature. Then, the reaction mixture was evaporated and subjected for <sup>1</sup>H NMR analysis using 1,3,5-trimethoxy benzene as internal standard to determine conversion.

### 2.3.6 Synthesis of Secondary Amines:

An oven dried 9 mL screw cap tube was taken inside the argon filled glove box and charged with a magnetic stir-bar, Imine (**Xa**) (0.50 mmol), Cat. **6** (0.30 - 0.50 mol%), and Cs<sub>2</sub>CO<sub>3</sub> (6-8 mol%), followed by the addition of methanol (3.5 mL). Then, the tube was sealed and placed in a preheated oil bath at 80 °C (oil bath temperature) for 3 h. After completion of the reaction, the tube was allowed to cool at room temperature. Then, the solvent was evaporated, and the crude residue was purified by alumina column chromatography using hexane-ethyl acetate as eluent which afforded the desired product.

## 3. Preparative Scale Synthesis

An oven dried 60 mL screw cap tube was taken inside the argon filled glove box and charged with a magnetic stir-bar, α,β-unsaturated ketone/ imine (1.0 g), Cat. **6** (0.10-0.30 mol%), CsOH.H<sub>2</sub>O/ NaOAc/Cs<sub>2</sub>CO<sub>3</sub> (4-20 mol%) followed by the addition of methanol or MeOH/H<sub>2</sub>O in 13:1 ratio (20.0 mL). Then the tube was sealed and placed in a preheated oil bath at 80-90 °C (oil bath temperature) for 3-12 h. After completion of the reaction, the tube was allowed to cool at room temperature. Then, the solvent was evaporated and the crude residue was purified by silica gel/ alumina column chromatography using hexane-ethyl acetate as eluent which afforded the desired product.

## 4. Control Experiments

### 4.1 Deuterium Labelling Experiment:

An oven dried 4 mL screw cap tube was taken inside the argon filled glove box and charged with a magnetic stir-bar, chalcone **1a** (20.80 mg, 0.10 mmol), Cat. **1** (0.05 mol%), and CsOH.H<sub>2</sub>O (4 mol%), followed by the addition of methanol (0.7 mL). Then, the tube was sealed and placed in a preheated oil bath at 80 °C (oil bath temperature) for 3 h. After completion of the reaction, the tube was allowed to cool at room temperature and the solvent was evaporated under reduced pressure. An appropriate amount of internal standard (mesitylene) was added to the reaction mixture. The yield of the methylated product, **2** was found to be 56% though GC analysis. The deuterium incorporated product **2-D<sub>2</sub>** was confirmed from ESI-MS analysis. **ESI-MS:** Calcd for C<sub>15</sub>H<sub>12</sub>D<sub>2</sub>O, [M+H]<sup>+</sup>, 213.1248; found 213.1238. (Scheme S1).

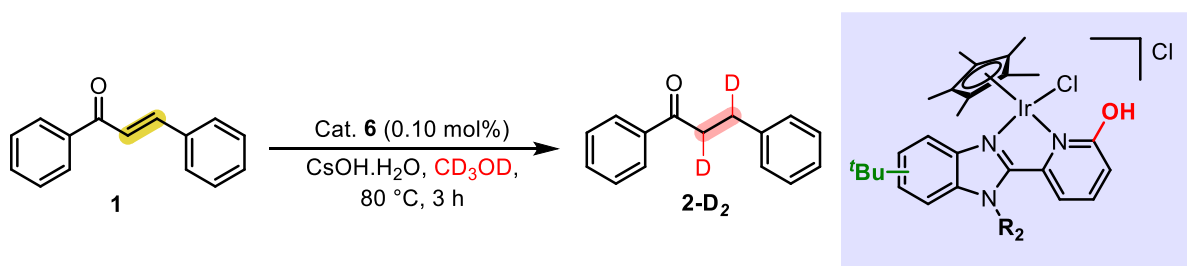

**Scheme S2** Deuterium labelling experiment

## 4.2 Synthesis and evaluation of reactivity for Ir(III)-H Species (Cat. **6H**):

The Ir(III)-H (Cat. **6H**) was synthesized following the previous literature method.<sup>3</sup> The evaluation of its reactivity was performed under optimized reaction condition.

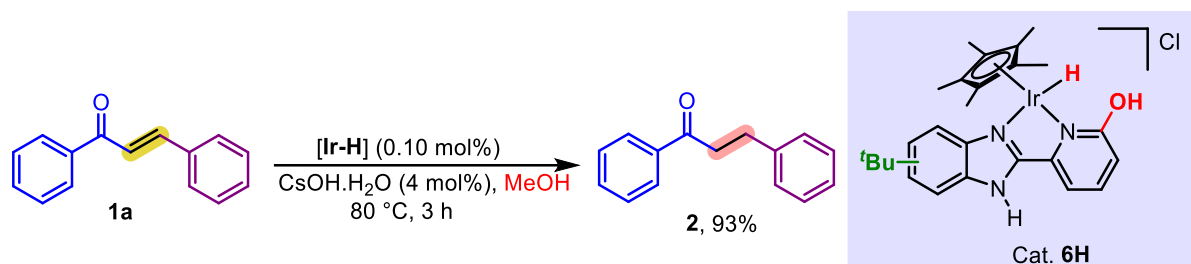

**Scheme S3** Reactivity for Ir(III)-H species for TH of C=C bond of chalcone (**1**)

## 5. Kinetic Studies

### 5.1 Time Dependent Study:

A number of experiments for the synthesis of 1,3-diphenylpropan-1-one from chalcone (**1**) were conducted following the outlined procedure with varying time. An oven dried screw cap tube was charged with chalcone (**1**) (15 mg, 0.072 mmol), Cat. **6** (0.10 mol %), CsOH.H<sub>2</sub>O (4 mol%) followed by the addition of methanol (0.7 mL). All the tubes were placed in a preheated oil-baths at 80 °C with stirring. The progress of the reaction was monitored by gas chromatography using mesitylene as internal standard. All the reactions were repeated twice and the average data were plotted as conversion (%) vs time (min).

### 5.2 Determination of Reaction Order for Tandem Conversion of Chalcone to Saturated Ketone:

Two identical experiments were carried out following the general procedure varying only the amount of chalcone, **1**. After completion of the reaction, the tube was allowed to cool at room temperature and the mixture was filtered through a small plug of silica gel and directly subjected for GC analysis using mesitylene as internal standard to determine the yield of the saturated ketone, **2**. Accordingly, the concentration the final product was calculated at different time. All the reactions were repeated twice and the average data were plotted as product conc. vs time (min) in the Figure S1. Then, the initial rate for the different run was calculated to determine the order with respect to **1**.

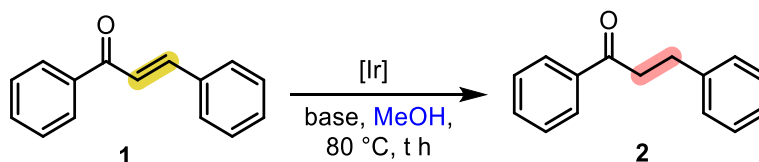

| Run | Chalcone ( <b>1a</b> ) (mmol) | Cat. <b>6</b> (10 <sup>-4</sup> mmol) | Base (10 <sup>-3</sup> mmol) | Methanol (mmol) |
|-----|-------------------------------|---------------------------------------|------------------------------|-----------------|
| 1   | 0.10 mmol                     | 1                                     | 4                            | 1 mL            |
| 2   | 0.20 mmol                     | 0.50                                  | 2                            | 1 mL            |

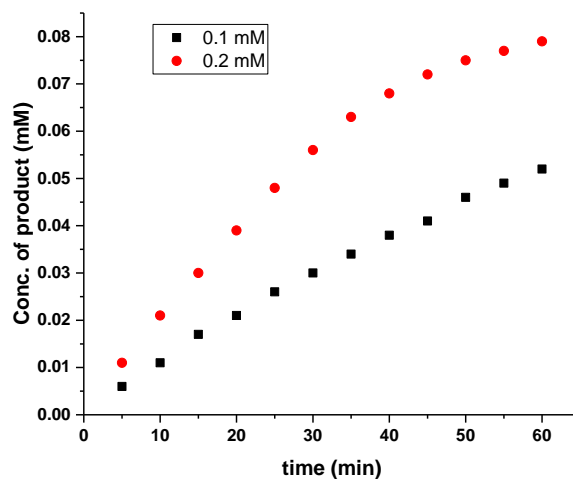

**Figure S1** Determination of initial slopes for the TH of C=C bond of chalcone (**1**).

Considering steady state approximation for methanol

$$\text{Initial slope for run 1 at 60 min (} r_1 \text{)} = 9.1190 \times 10^{-4} \text{ (mM)/min} = k [1a (0.10 \text{ mmol})]^x$$

$$\text{Initial slope for run 2 at 60 min (} r_2 \text{)} = 16.5714 \times 10^{-4} \text{ (mM)/min} = k [1a (0.20 \text{ mmol})]^x$$

$$\text{Comparing the initial slopes, } r_1/r_2 = 16.5714 / 9.1190 = (0.20 / 0.10)^x$$

$$\text{or, } 1.820 = (2.0)^x$$

$$\text{or, } \log(1.820) = \log(2.0)^x$$

$$\text{or, } x = \log(1.820) / \log(2.0)$$

$$\text{or, } x = 0.864 \approx 1$$

$$\text{So, rate} = k[1a]^1$$

This experiment stated that C=C bond TH of chalcone (**1**) follow a first order kinetics with respect to the **1** concentration.

### 5.3 Kinetic Isotope Effect (KIE) Studies:

Parallel reactions for the synthesis of 1,3-diphenylpropan-1-one from chalcone (**1a**) were carried out using CH<sub>3</sub>OH and CD<sub>3</sub>OD under identical conditions following the outlined procedure. All the tubes were placed in a preheated oil-baths at 80 °C with stirring and the progress of the reaction was analysed by GC using mesitylene as internal standard. All the reactions were repeated twice and the average data were plotted as ln(a/a-x) vs time (min) (Figure S2)

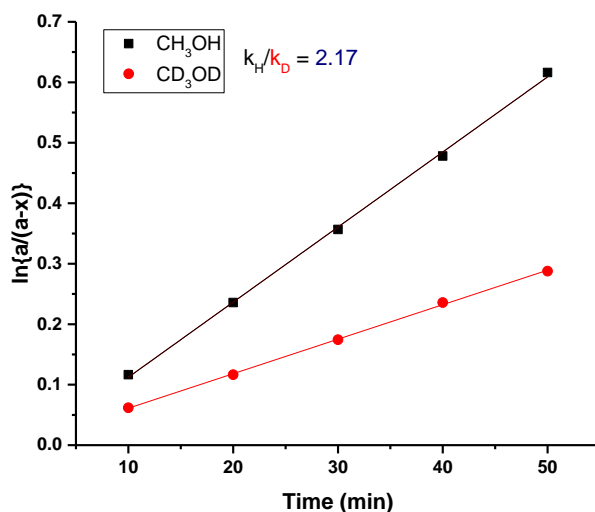

**Figure S2** KIE study for TH of C=C bond of chalcone (**1**).

## 6. Hammett Studies:

An oven dried screw cap tube was charged with several electronically disparate chalcone derivatives (0.10 mmol), Cat. **1** (0.10 mol %), CsOH.H<sub>2</sub>O (4 mol%) followed by the addition of methanol. All the tubes were placed in a preheated oil-baths at 80 °C with stirring. The progress of the reaction was analysed by GC using mesitylene as internal standard. Reactivity towards the conversion of chalcone derivatives to saturated ketone compounds followed the sequence: 4-CF<sub>3</sub> > 4-Cl > 4-H > 4-Me > 4-OMe (Figure S3, and S4; Table S1).

**Table S1** Hammett Analysis with the Para Substitution Constant ( $\sigma$ )

| Substrate         | $k \times 10^{-4} \text{ (min}^{-1}\text{)}$ | $k_X/k_H$ | $\text{Log}(k_X/k_H)$ | $\sigma_P$ | $\rho$       |
|-------------------|----------------------------------------------|-----------|-----------------------|------------|--------------|
| 4-OMe             | 54.0                                         | 0.43478   | -0.36173              | -0.268     | <b>+1.20</b> |
| 4-Me              | 70.6                                         | 0.56844   | -0.24532              | -0.17      |              |
| 4-H               | 124.2                                        | 1         | 0                     | 0          |              |
| 4-Cl              | 181.6                                        | 1.46216   | 0.16499               | 0.227      |              |
| 4-CF <sub>3</sub> | 540.0                                        | 4.34783   | 0.63827               | 0.544      |              |



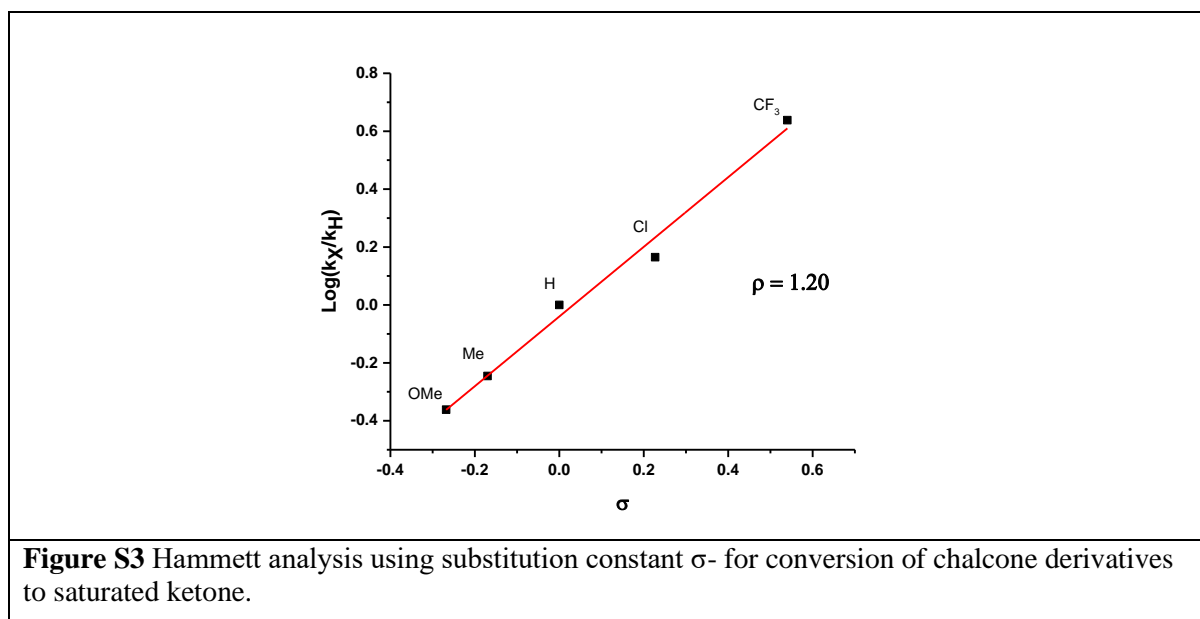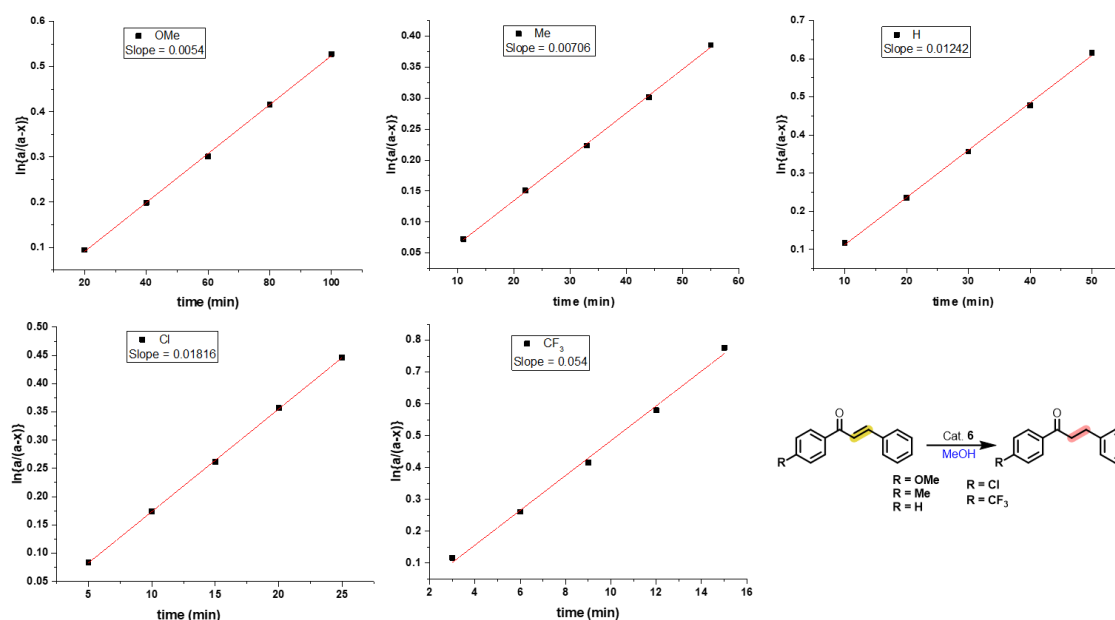

**Figure S4** Determination of rate constant for the conversion of electronically disparate chalcones to saturated ketones.

## 7. Transfer Hydrogenation of Nitro-substituted Chalcone (18a) at Different Time Duration:

An oven dried 4 mL screw cap tube was taken inside the argon filled glove box and charged with a magnetic stir-bar, chalcone **18a** (25.30 mg, 0.10 mmol), Cat. **6** (0.05 mol%), and NaOAc (20 mol%), followed by the addition of MeOH/H<sub>2</sub>O mixture in 13:1 (v/v) ratio. Then, the tube was sealed and placed in a preheated oil bath at 90 °C (oil bath temperature) for 3-36 h. After completion of the reaction, the tube was allowed to cool at room temperature. Then, the reaction mixture was subjected for <sup>1</sup>H NMR analysis using 1,3,5-trimethoxybenzene as internal standard to determine conversion and yield of the product.

## 8. Computational Studies:

All the calculations were performed using the Gaussian 09 package.<sup>6</sup> Full geometry optimization followed by frequency calculations on the stationary points were carried out to ascertain the nature of the stationary points as minima or first order saddle point. Hybrid functional, M06-2X was used with the LANL2DZ basis set<sup>7</sup> for Ir and 6-31G\*\* basis set<sup>8</sup> for non-metal elements. The transition states (TS) were further confirmed by performing intrinsic reaction coordinate (IRC) calculation using the same method.

### Methanol:

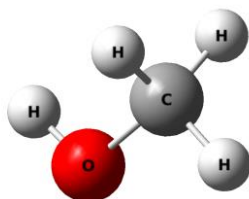

| Methanol                                |             |
|-----------------------------------------|-------------|
| SCF Done: E (RM062X)                    | -115.632634 |
| Thermal correction to Gibbs Free Energy | 0.029621    |

|   |             |             |             |
|---|-------------|-------------|-------------|
| C | 0.67796500  | -0.02077100 | 0.00000300  |
| H | 1.08039300  | 0.97990900  | -0.00098900 |
| H | 1.03897300  | -0.53855000 | 0.88256200  |
| H | 1.03884400  | -0.54022600 | -0.88162700 |
| O | -0.75597400 | 0.12134300  | 0.00000300  |
| H | -1.17820200 | -0.74725200 | 0.00001000  |

### Chalcone:

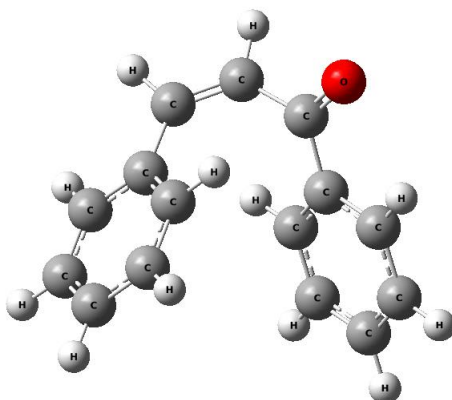

| Chalcone                                |             |
|-----------------------------------------|-------------|
| SCF Done: E (RM062X)                    | -653.565828 |
| Thermal correction to Gibbs Free Energy | 0.185714    |

|   |            |            |             |
|---|------------|------------|-------------|
| C | 0.00000000 | 0.00000000 | 0.00000000  |
| C | 0.00000000 | 0.00000000 | 1.38891257  |
| C | 1.18819352 | 0.00000000 | -0.70113078 |

|   |             |             |             |
|---|-------------|-------------|-------------|
| C | 1.20986066  | 0.02544536  | 2.06721140  |
| C | 2.39320348  | 0.01607206  | -0.01743113 |
| H | 1.17777185  | -0.00904766 | -1.77260087 |
| C | 2.40266063  | 0.03577576  | 1.36557320  |
| H | 1.23126673  | 0.06086980  | 3.13689517  |
| H | 3.31811713  | 0.01851935  | -0.55935112 |
| H | 3.33289362  | 0.06287856  | 1.89686422  |
| H | -0.94044223 | 0.00019305  | -0.51033160 |
| C | -1.33276810 | 0.01210953  | 2.07340486  |
| O | -2.33027545 | 0.27651365  | 1.41921092  |
| C | -1.34437637 | -0.34503105 | 3.50464285  |
| H | -0.53561217 | -0.98736212 | 3.79270887  |
| C | -2.19343571 | -0.00490201 | 4.47232923  |
| H | -1.94375059 | -0.41587753 | 5.43599166  |
| C | -3.37955417 | 0.87002525  | 4.55138557  |
| C | -3.74177442 | 1.30171064  | 5.82977330  |
| C | -4.16090282 | 1.26938897  | 3.46962043  |
| C | -4.83189175 | 2.12415395  | 6.02427317  |
| H | -3.15836278 | 0.99147519  | 6.67538775  |
| C | -5.25784705 | 2.08828687  | 3.67006531  |
| H | -3.90736478 | 0.93508379  | 2.49028589  |
| C | -5.59534337 | 2.52109271  | 4.93927880  |
| H | -5.08739928 | 2.44900674  | 7.01314371  |
| H | -5.85143190 | 2.38439075  | 2.82806993  |
| H | -6.44742441 | 3.15527229  | 5.08435150  |

### 1,3-diphenylpropan-1-one (2):

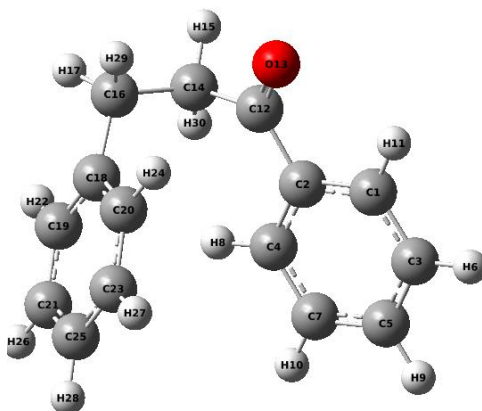

| 1,3-diphenylpropan-1-one                |             |
|-----------------------------------------|-------------|
| SCF Done: E (RM062X)                    | -654.770530 |
| Thermal correction to Gibbs Free Energy | 0.209978    |

|   |            |             |             |
|---|------------|-------------|-------------|
| C | 0.00000000 | 0.00000000  | 0.00000000  |
| C | 0.00000000 | 0.00000000  | 1.38891257  |
| C | 1.18819352 | 0.00000000  | -0.70113078 |
| C | 1.20986066 | 0.02544536  | 2.06721140  |
| C | 2.39320348 | 0.01607206  | -0.01743113 |
| H | 1.17777185 | -0.00904766 | -1.77260087 |

|   |             |             |             |
|---|-------------|-------------|-------------|
| C | 2.40266063  | 0.03577576  | 1.36557320  |
| H | 1.23126673  | 0.06086980  | 3.13689517  |
| H | 3.31811713  | 0.01851935  | -0.55935112 |
| H | 3.33289362  | 0.06287856  | 1.89686422  |
| H | -0.94044223 | 0.00019305  | -0.51033160 |
| C | -1.33276810 | 0.01210953  | 2.07340486  |
| O | -2.33027545 | 0.27651365  | 1.41921092  |
| C | -1.34437637 | -0.34503105 | 3.50464285  |
| H | -0.53561217 | -0.98736212 | 3.79270887  |
| C | -2.19343571 | -0.00490201 | 4.47232923  |
| H | -1.94375059 | -0.41587753 | 5.43599166  |
| C | -3.37955417 | 0.87002525  | 4.55138557  |
| C | -3.74177442 | 1.30171064  | 5.82977330  |
| C | -4.16090282 | 1.26938897  | 3.46962043  |
| C | -4.83189175 | 2.12415395  | 6.02427317  |
| H | -3.15836278 | 0.99147519  | 6.67538775  |
| C | -5.25784705 | 2.08828687  | 3.67006531  |
| H | -3.90736478 | 0.93508379  | 2.49028589  |
| C | -5.59534337 | 2.52109271  | 4.93927880  |
| H | -5.08739928 | 2.44900674  | 7.01314371  |
| H | -5.85143190 | 2.38439075  | 2.82806993  |
| H | -6.44742441 | 3.15527229  | 5.08435150  |

### 1,3-diphenylprop-1-en-1-ol :

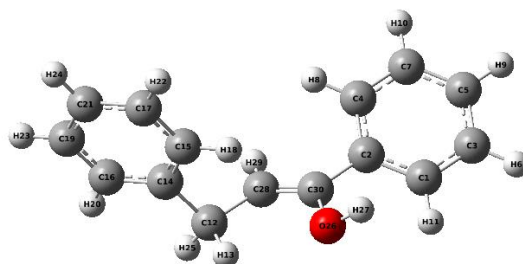

| 1,3-diphenylpropan-1-one                |             |
|-----------------------------------------|-------------|
| SCF Done: E (RM062X)                    | -654.752225 |
| Thermal correction to Gibbs Free Energy | 0.207616    |

|   |             |             |             |
|---|-------------|-------------|-------------|
| C | 3.40317800  | -0.81660300 | 0.31745300  |
| C | 2.21936800  | -0.16734400 | -0.05235000 |
| C | 4.61855100  | -0.13977800 | 0.29577700  |
| C | 2.27682900  | 1.17870900  | -0.43125000 |
| C | 4.66742300  | 1.19542800  | -0.09355500 |
| H | 5.52916700  | -0.65945400 | 0.57619800  |
| C | 3.49244900  | 1.85097000  | -0.45807500 |
| H | 1.35717000  | 1.69869700  | -0.68057000 |
| H | 5.61415300  | 1.72540900  | -0.10898300 |
| H | 3.52187600  | 2.89595300  | -0.74999500 |
| H | 3.37278100  | -1.86733900 | 0.59243100  |
| C | -1.39517000 | -1.41039600 | -0.80403600 |
| H | -1.30330300 | -2.26304500 | -0.12478600 |

|   |             |             |             |
|---|-------------|-------------|-------------|
| C | -2.49930700 | -0.49239900 | -0.31491300 |
| C | -2.39610100 | 0.09003600  | 0.95196400  |
| C | -3.61688700 | -0.20382500 | -1.09606900 |
| C | -3.39062600 | 0.93451100  | 1.42929200  |
| H | -1.52171000 | -0.13247600 | 1.55911200  |
| C | -4.61551700 | 0.64647600  | -0.62294500 |
| H | -3.70816000 | -0.64972600 | -2.08330800 |
| C | -4.50529900 | 1.21747400  | 0.64035300  |
| H | -3.29791700 | 1.37555500  | 2.41705600  |
| H | -5.47915900 | 0.86308200  | -1.24421800 |

**1,3-diphenylprop-2-en-1-ol:**

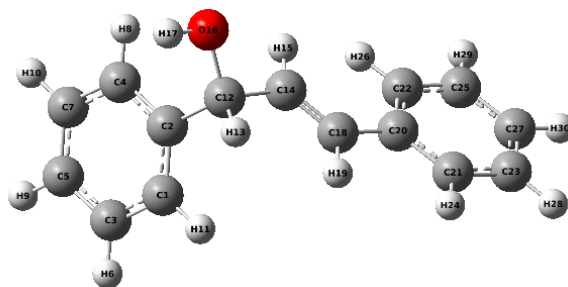

| <b>1,3-diphenylprop-2-en-1-ol</b>              |                    |
|------------------------------------------------|--------------------|
| <b>SCF Done: E (RM062X)</b>                    | <b>-651.131554</b> |
| <b>Thermal correction to Gibbs Free Energy</b> | <b>0.210042</b>    |

|   |             |             |             |
|---|-------------|-------------|-------------|
| C | 2.36170700  | -0.81247500 | -1.09994200 |
| C | 2.30693900  | 0.30664300  | -0.26746300 |
| C | 3.25832700  | -1.84358900 | -0.82700900 |
| C | 3.14364800  | 0.38669300  | 0.84462600  |
| C | 4.10303700  | -1.76020100 | 0.28351700  |
| H | 3.29928500  | -2.71078600 | -1.47527300 |
| C | 4.04183000  | -0.64541700 | 1.12007600  |
| H | 3.07088300  | 1.26126600  | 1.47935500  |
| H | 4.80081500  | -2.56136500 | 0.49467800  |
| H | 4.69094500  | -0.58096700 | 1.98545500  |
| H | 1.69584300  | -0.87835300 | -1.95498100 |
| C | 1.31286500  | 1.43084500  | -0.53310800 |
| H | 1.23121000  | 1.60050600  | -1.61684000 |
| C | -0.02609100 | 1.02889400  | 0.02463400  |
| H | -0.08101800 | 1.08397900  | 1.10803300  |
| O | 1.70018900  | 2.63679000  | 0.18382800  |
| H | 2.57867600  | 2.93106300  | -0.17499400 |
| C | -1.03558100 | 0.59603200  | -0.73101700 |
| H | -0.91629800 | 0.59322200  | -1.81409600 |
| C | -2.34905100 | 0.12182600  | -0.24994800 |
| C | -3.37712000 | -0.09048900 | -1.18068200 |
| C | -2.61278300 | -0.12365600 | 1.10724700  |
| C | -4.63694000 | -0.52369200 | -0.77045900 |
| H | -3.18289500 | 0.09103800  | -2.23260200 |
| C | -3.87112000 | -0.55421000 | 1.51783300  |
| H | -1.82731300 | 0.01219600  | 1.84152500  |
| C | -4.88929300 | -0.75467100 | 0.58170200  |

|   |             |             |             |
|---|-------------|-------------|-------------|
| H | -5.41867700 | -0.67936100 | -1.50450400 |
| H | -4.05890300 | -0.73964800 | 2.56862900  |
| H | -5.86630600 | -1.09231000 | 0.90495800  |

**3-phenyl-1-(4-(trifluoromethyl)phenyl)prop-1-en-1-ol:**

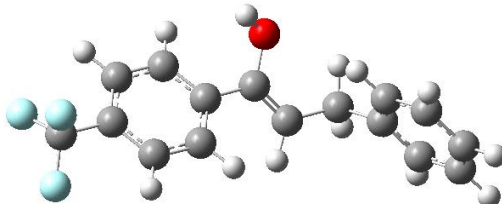

| <b>3-phenyl-1-(4-(trifluoromethyl)phenyl)prop-1-en-1-ol</b> |                    |
|-------------------------------------------------------------|--------------------|
| <b>SCF Done: E (RM062X)</b>                                 | <b>-991.682194</b> |
| <b>Thermal correction to Gibbs Free Energy</b>              | <b>0.210503</b>    |

|   |             |             |             |
|---|-------------|-------------|-------------|
| C | -1.74123300 | 1.61792300  | 0.32065400  |
| C | -0.68740500 | 0.76913300  | -0.03809600 |
| C | -3.05350100 | 1.15570800  | 0.32271100  |
| C | -0.97462100 | -0.55686200 | -0.38156300 |
| C | -3.33052000 | -0.16130800 | -0.03151000 |
| H | -3.86075400 | 1.82847100  | 0.59410400  |
| C | -2.28641100 | -1.01466500 | -0.38477100 |
| H | -0.15821700 | -1.23068800 | -0.62190400 |
| H | -2.49440200 | -2.04658400 | -0.64926000 |
| H | -1.53147400 | 2.65492700  | 0.56805300  |
| C | 3.07781800  | 1.36499400  | -0.84005700 |
| H | 3.13744100  | 2.23748200  | -0.18275900 |
| C | 4.01582600  | 0.28615200  | -0.33279100 |
| C | 3.82771600  | -0.23891100 | 0.94931000  |
| C | 5.06136300  | -0.20625700 | -1.11179600 |
| C | 4.66997800  | -1.22709400 | 1.44342600  |
| H | 3.00910200  | 0.14302800  | 1.55486200  |
| C | 5.90664900  | -1.20097800 | -0.62175300 |
| H | 5.21729800  | 0.19322200  | -2.11074600 |
| C | 5.71352400  | -1.71367600 | 0.65650800  |
| H | 4.51345100  | -1.62153100 | 2.44278100  |
| H | 6.71553200  | -1.57563300 | -1.24152400 |
| H | 6.37025100  | -2.48836100 | 1.03919300  |
| H | 3.39961700  | 1.68502700  | -1.83707100 |
| O | 0.98028000  | 2.25613900  | 0.89169100  |
| H | 0.36960800  | 2.16026100  | 1.63173000  |
| C | 1.65408700  | 0.88461800  | -0.88681500 |
| H | 1.38365800  | 0.16231100  | -1.65018200 |
| C | 0.70355400  | 1.27824800  | -0.03223400 |
| C | -4.78191900 | -0.67610900 | -0.02706700 |
| F | -5.06179600 | -1.22281400 | 1.17513300  |
| F | -5.62481700 | 0.35213500  | -0.26102300 |
| F | -4.93147300 | -1.60893600 | -0.99141500 |

**1-(4-methoxyphenyl)-3-phenylprop-1-en-1-ol:**

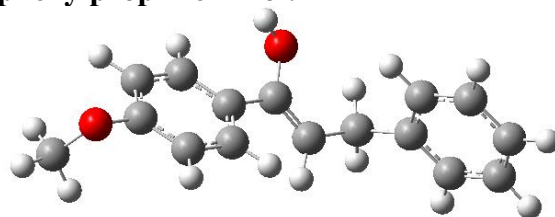

|                                                   |                    |
|---------------------------------------------------|--------------------|
| <b>1-(4-methoxyphenyl)-3-phenylprop-1-en-1-ol</b> |                    |
| <b>SCF Done: E (RM062X)</b>                       | <b>-769.191716</b> |
| <b>Thermal correction to Gibbs Free Energy</b>    | <b>0.237529</b>    |

|   |             |             |             |
|---|-------------|-------------|-------------|
| C | 2.47229200  | 1.31444900  | -0.39338700 |
| C | 1.37374400  | 0.51479800  | -0.05656900 |
| C | 3.74593800  | 0.76315900  | -0.49135900 |
| C | 1.57589800  | -0.85196700 | 0.16661800  |
| C | 3.93901100  | -0.59485700 | -0.25628800 |
| H | 4.58924100  | 1.39786400  | -0.74416400 |
| C | 2.84959700  | -1.39927600 | 0.07426300  |
| H | 0.72218300  | -1.48451300 | 0.38882800  |
| H | 2.99133500  | -2.46160200 | 0.24585700  |
| H | 2.32983500  | 2.38053800  | -0.54747800 |
| C | -2.30323800 | 1.30455800  | 0.95890200  |
| H | -2.32420300 | 2.23056400  | 0.37674700  |
| C | -3.33714100 | 0.33989600  | 0.40976700  |
| C | -3.23841500 | -0.08895100 | -0.91733700 |
| C | -4.38479500 | -0.14090500 | 1.19316700  |
| C | -4.16972500 | -0.97129100 | -1.45043900 |
| H | -2.41823800 | 0.28355900  | -1.52663500 |
| C | -5.31944000 | -1.02987000 | 0.66373300  |
| H | -4.47176200 | 0.18432000  | 2.22683300  |
| C | -5.21465700 | -1.44709500 | -0.65878400 |
| H | -4.08181400 | -1.29151200 | -2.48413300 |
| H | -6.12882900 | -1.39699900 | 1.28733600  |
| H | -5.94102300 | -2.13944200 | -1.07221300 |
| H | -2.56141000 | 1.56259400  | 1.99175200  |
| O | -0.21517000 | 2.18699300  | -0.78867800 |
| H | 0.35740000  | 2.11023500  | -1.56071600 |
| C | -0.91794400 | 0.72335300  | 0.90307800  |
| H | -0.67171600 | -0.07692900 | 1.59337400  |
| C | 0.02481900  | 1.11888400  | 0.04080200  |
| O | 5.24674900  | -1.16418500 | -0.35917700 |
| C | 6.02226900  | -0.78799300 | 0.78185300  |
| H | 6.92761500  | -1.35796400 | 0.80142900  |
| H | 6.25806000  | 0.25415400  | 0.72499700  |
| H | 5.46141700  | -0.97868400 | 1.67290900  |

I<sub>0</sub>

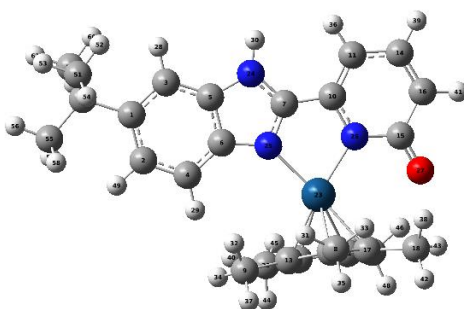

| I <sub>0</sub>                          |              |
|-----------------------------------------|--------------|
| SCF Done: E (RM062X)                    | -1352.406182 |
| Thermal correction to Gibbs Free Energy | 0.463352     |

|    |            |             |             |
|----|------------|-------------|-------------|
| C  | 0.00000000 | 0.00000000  | 0.00000000  |
| C  | 0.00000000 | 0.00000000  | 1.41236210  |
| C  | 1.22217618 | 0.00000000  | -0.67253812 |
| C  | 1.16349657 | 0.01417541  | 2.16749111  |
| C  | 2.38522615 | 0.01364470  | 0.08631692  |
| C  | 2.37850016 | 0.03722865  | 1.48982562  |
| C  | 4.46554468 | -0.01181733 | 0.84388573  |
| C  | 4.67969762 | 3.15353651  | 5.00183505  |
| C  | 2.01730864 | 1.49133680  | 5.16658595  |
| C  | 5.90688315 | -0.10627639 | 1.00719166  |
| C  | 6.79090645 | -0.21374254 | -0.02195339 |
| C  | 4.60429679 | 1.68457757  | 5.24486069  |
| C  | 3.39042286 | 0.90725975  | 5.28473263  |
| C  | 8.17395759 | -0.36226649 | 0.30025262  |
| C  | 7.59167503 | -0.34370606 | 2.69563444  |
| C  | 8.55588029 | -0.42396672 | 1.59810597  |
| C  | 5.72541411 | 0.83643120  | 5.58865365  |
| C  | 7.10996059 | 1.33537637  | 5.84400783  |
| C  | 3.76858626 | -0.44556580 | 5.51401305  |
| C  | 2.86072278 | -1.62732749 | 5.60017449  |
| C  | 5.22389176 | -0.48872650 | 5.71384575  |
| C  | 6.02327509 | -1.70426431 | 6.03884614  |
| Ir | 4.76723804 | 0.20112435  | 3.71105288  |
| N  | 3.72654839 | -0.01535782 | -0.27999327 |
| N  | 3.69934773 | 0.03673989  | 1.93032411  |
| N  | 6.25857625 | -0.11973424 | 2.33755994  |
| O  | 7.92063517 | -0.46557873 | 3.86952730  |
| H  | 1.26759143 | -0.01822843 | -1.75669149 |
| H  | 1.12827796 | -0.01004978 | 3.24855912  |
| H  | 4.08713778 | -0.05874613 | -1.22176581 |
| H  | 3.88654126 | 3.48492583  | 4.32890860  |
| H  | 1.87635904 | 2.02278931  | 4.22216527  |
| H  | 5.64511057 | 3.43060915  | 4.57483283  |
| H  | 1.24778276 | 0.72325881  | 5.25559999  |



|   |             |             |             |
|---|-------------|-------------|-------------|
| H | 4.56394446  | 3.68381480  | 5.95382188  |
| H | 6.46015055  | -0.19583937 | -1.05381617 |
| H | 1.86252004  | 2.20440562  | 5.98202934  |
| H | 7.50352549  | 1.87982004  | 4.98344261  |
| H | 8.90613976  | -0.43550258 | -0.49692777 |
| H | 1.91419260  | -1.43920350 | 5.09063619  |
| H | 9.59049388  | -0.55307870 | 1.89268739  |
| H | 7.08117128  | 2.01111252  | 6.70533585  |
| H | 7.79307804  | 0.51434309  | 6.04757332  |
| H | 2.64882705  | -1.85917048 | 6.64889195  |
| H | 3.32152793  | -2.50642106 | 5.14536911  |
| H | 6.98852408  | -1.65832782 | 5.53156503  |
| H | 5.50162429  | -2.61296695 | 5.73343300  |
| H | 6.18412107  | -1.75335579 | 7.12096974  |
| H | -0.94600092 | -0.01928721 | 1.93887716  |
| C | -1.29550964 | -0.01880587 | -0.81805014 |
| C | -1.33044884 | 1.21321081  | -1.73869430 |
| H | -0.49062293 | 1.22240788  | -2.43957989 |
| H | -2.25286028 | 1.21110513  | -2.32672749 |
| H | -1.29756689 | 2.13878868  | -1.15632544 |
| C | -2.54182811 | 0.00778450  | 0.07239922  |
| H | -3.43527385 | 0.00482654  | -0.55723347 |
| H | -2.59486718 | -0.87050150 | 0.72318647  |
| H | -2.57763910 | 0.90880161  | 0.69282334  |
| C | -1.33383122 | -1.29871709 | -1.67058073 |
| H | -0.49565175 | -1.34580716 | -2.37191423 |
| H | -1.29905125 | -2.19072136 | -1.03833823 |
| H | -2.25796796 | -1.32870648 | -2.25535543 |

TS<sub>1</sub>

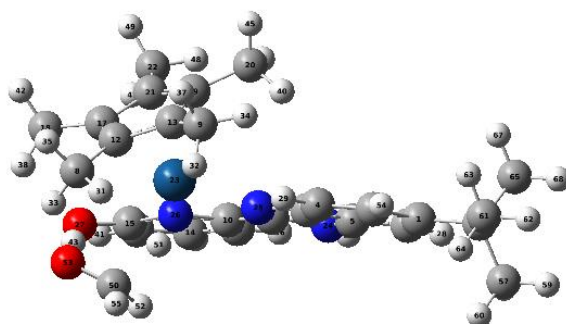

| TS <sub>1</sub>                         |              |
|-----------------------------------------|--------------|
| SCF Done: E (RM062X)                    | -1468.112389 |
| Thermal correction to Gibbs Free Energy | 0.471448     |

|   |            |             |             |
|---|------------|-------------|-------------|
| C | 4.81733600 | 0.02196800  | -0.21780300 |
| C | 4.01687300 | -1.09922100 | -0.54461200 |

|    |             |             |             |
|----|-------------|-------------|-------------|
| C  | 4.19702700  | 1.23697700  | 0.06726200  |
| C  | 2.63283900  | -1.05255400 | -0.57814200 |
| C  | 2.80711800  | 1.28557700  | 0.03493200  |
| C  | 2.02056100  | 0.16022800  | -0.26448600 |
| C  | 0.65903400  | 1.81595000  | 0.09610200  |
| C  | -2.74479400 | -3.10106700 | -1.24505100 |
| C  | 0.11341900  | -3.51617600 | 0.13388700  |
| C  | -0.62237800 | 2.50902500  | 0.16552800  |
| C  | -0.76898200 | 3.83447700  | 0.49641900  |
| C  | -2.22590300 | -2.36700400 | -0.05234300 |
| C  | -0.90551000 | -2.48798000 | 0.51571100  |
| C  | -2.06975700 | 4.37247600  | 0.47081800  |
| C  | -2.89704000 | 2.23112600  | -0.31717700 |
| C  | -3.11687400 | 3.58776400  | 0.06747400  |
| C  | -2.96126500 | -1.40507800 | 0.70725700  |
| C  | -4.41213000 | -1.08755000 | 0.53880200  |
| C  | -0.85711700 | -1.63089500 | 1.69171100  |
| C  | 0.33083000  | -1.48294400 | 2.58729400  |
| C  | -2.10731700 | -0.95886900 | 1.80369200  |
| C  | -2.51901800 | 0.03464500  | 2.84110200  |
| Ir | -1.18357500 | -0.44631900 | -0.14602100 |
| N  | 1.90663100  | 2.31800200  | 0.25404800  |
| N  | 0.68873100  | 0.53097300  | -0.20409100 |
| N  | -1.66116100 | 1.69495500  | -0.18071200 |
| O  | -3.88060000 | 1.54164000  | -0.77657800 |
| H  | 4.77807900  | 2.12130600  | 0.30754800  |
| H  | 2.04036600  | -1.91492500 | -0.86000800 |
| H  | 2.13917200  | 3.27909900  | 0.45419600  |
| H  | -1.92681500 | -3.50094300 | -1.84715300 |
| H  | 0.23112900  | -3.58446900 | -0.94997200 |
| H  | -3.35232200 | -2.43757700 | -1.86582700 |
| H  | 1.08612900  | -3.29328200 | 0.57585400  |
| H  | -3.36920800 | -3.93839300 | -0.91787800 |
| H  | 0.08380400  | 4.44399000  | 0.77061000  |
| H  | -0.20038300 | -4.49839200 | 0.50153000  |
| H  | -4.71487000 | -1.18694200 | -0.50489600 |
| H  | -2.23572100 | 5.40869300  | 0.74542700  |
| H  | 1.26009300  | -1.49772600 | 2.01145100  |
| H  | -4.13027000 | 3.96199800  | -0.00841500 |
| H  | -5.00128700 | -1.79005800 | 1.13771300  |
| H  | -3.67006500 | 0.71561900  | -1.56147300 |
| H  | -4.64487700 | -0.07168100 | 0.85716800  |
| H  | 0.36273600  | -2.30920500 | 3.30433600  |
| H  | 0.29386900  | -0.54779700 | 3.14864800  |
| H  | -3.11394300 | 0.83610800  | 2.39555300  |
| H  | -1.65537200 | 0.48174000  | 3.33606500  |
| H  | -3.13403300 | -0.45470400 | 3.60323200  |
| C  | -2.20980400 | 0.01618500  | -2.81060000 |
| H  | -1.20831700 | -0.42709800 | -1.81592700 |
| H  | -1.77673500 | 1.02344300  | -2.86144100 |
| O  | -3.41363300 | -0.13615500 | -2.42290800 |
| H  | 4.50103900  | -2.03672000 | -0.78776000 |
| H  | -1.81597200 | -0.70020400 | -3.53979500 |
| C  | 6.34747600  | -0.05619700 | -0.17083700 |

|   |            |             |             |
|---|------------|-------------|-------------|
| C | 6.93918500 | 0.94902900  | -1.17377500 |
| H | 6.64883500 | 1.97739900  | -0.93990800 |
| H | 8.03171800 | 0.89931800  | -1.14806600 |
| H | 6.60964400 | 0.72517000  | -2.19254200 |
| C | 6.86783400 | -1.45341500 | -0.52338700 |
| H | 7.95969700 | -1.45464900 | -0.47187500 |
| H | 6.50392000 | -2.21112800 | 0.17758000  |
| H | 6.58532000 | -1.74863100 | -1.53870400 |
| C | 6.82351200 | 0.29422100  | 1.24950300  |
| H | 6.52797600 | 1.30691200  | 1.53926000  |
| H | 6.41057500 | -0.40405400 | 1.98349800  |
| H | 7.91488900 | 0.23875600  | 1.30111500  |

I<sub>1</sub>

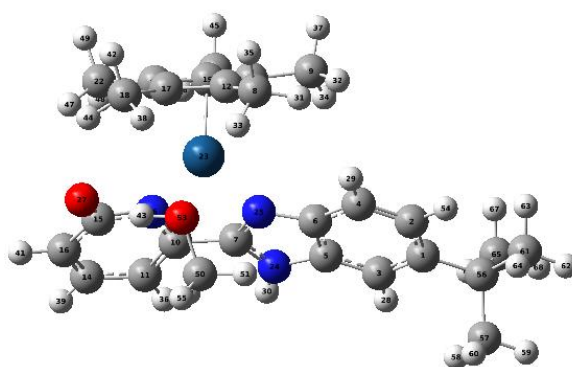

| I <sub>1</sub>                          |              |
|-----------------------------------------|--------------|
| SCF Done: E (RM062X)                    | -1468.151359 |
| Thermal correction to Gibbs Free Energy | 0.478003     |

|   |             |             |             |
|---|-------------|-------------|-------------|
| C | 4.75182100  | -0.00213700 | -0.09661500 |
| C | 3.95398300  | -1.07973100 | -0.54873000 |
| C | 4.12917200  | 1.17102500  | 0.32858300  |
| C | 2.56964700  | -1.03020600 | -0.57847200 |
| C | 2.73968100  | 1.22239300  | 0.29844000  |
| C | 1.95593600  | 0.13881700  | -0.13175500 |
| C | 0.59096500  | 1.75896800  | 0.37806900  |
| C | -1.32355100 | -3.47504800 | -1.34516900 |
| C | 0.44985500  | -2.89878400 | 1.31913400  |
| C | -0.69464800 | 2.45296000  | 0.41969900  |
| C | -0.89214900 | 3.78640300  | 0.66590100  |
| C | -1.66599000 | -2.58727400 | -0.19216700 |
| C | -0.87693900 | -2.31311600 | 0.95943800  |
| C | -2.20224600 | 4.28967800  | 0.45823900  |
| C | -2.91135900 | 2.10876700  | -0.39108700 |
| C | -3.18245300 | 3.48813600  | -0.05531000 |
| C | -2.92098000 | -1.84563100 | -0.06632700 |
| C | -4.04325900 | -1.86696600 | -1.05244700 |
| C | -1.58911900 | -1.34764900 | 1.78316500  |
| C | -1.14632900 | -0.84101600 | 3.11845100  |

|    |             |             |             |
|----|-------------|-------------|-------------|
| C  | -2.88837700 | -1.12813100 | 1.16660600  |
| C  | -3.97221100 | -0.25503800 | 1.70705700  |
| Ir | -1.27767000 | -0.43729700 | -0.09721900 |
| N  | 1.83596800  | 2.22936500  | 0.61497000  |
| N  | 0.62373600  | 0.50791400  | -0.06022500 |
| N  | -1.69198500 | 1.62053900  | 0.01498000  |
| O  | -3.69179500 | 1.36530900  | -1.02702700 |
| H  | 4.70905300  | 2.02446000  | 0.66470400  |
| H  | 1.97597300  | -1.85879900 | -0.95095000 |
| H  | 2.06353300  | 3.15935800  | 0.93390300  |
| H  | -0.26474800 | -3.73850100 | -1.34484100 |
| H  | 0.89793200  | -3.43739100 | 0.48376600  |
| H  | -1.54908500 | -2.97770100 | -2.29128600 |
| H  | 1.15302500  | -2.13146100 | 1.65153600  |
| H  | -1.90651200 | -4.39970900 | -1.29636900 |
| H  | -0.08283500 | 4.43600200  | 0.97671200  |
| H  | 0.31044400  | -3.60876400 | 2.14073600  |
| H  | -3.66697200 | -2.05671900 | -2.06010000 |
| H  | -2.41304500 | 5.33197500  | 0.67469200  |
| H  | -0.05784400 | -0.76453000 | 3.16436300  |
| H  | -4.17528000 | 3.86186500  | -0.27584600 |
| H  | -4.74963500 | -2.66316200 | -0.79795200 |
| H  | -2.50436100 | 0.50016800  | -2.11532700 |
| H  | -4.56586500 | -0.90880700 | -1.05844900 |
| H  | -1.47575600 | -1.51757600 | 3.91320100  |
| H  | -1.56529300 | 0.14760900  | 3.31635100  |
| H  | -4.57207700 | 0.16159800  | 0.89737100  |
| H  | -3.55697400 | 0.57111600  | 2.28855900  |
| H  | -4.61588900 | -0.84639400 | 2.36570700  |
| C  | -0.75741300 | 0.92826700  | -2.97908900 |
| H  | 0.20471400  | 0.42167200  | -3.06490900 |
| H  | -0.62543800 | 1.87260700  | -2.43987700 |
| O  | -1.63590700 | 0.05221300  | -2.27184100 |
| H  | 4.43900300  | -1.98348200 | -0.89578500 |
| H  | -1.15834900 | 1.12386100  | -3.97573200 |
| C  | 6.28283300  | -0.07759200 | -0.07291100 |
| C  | 6.85633700  | 1.02265500  | -0.98230600 |
| H  | 6.56370200  | 2.02156600  | -0.64611600 |
| H  | 7.94938100  | 0.97737700  | -0.97766900 |
| H  | 6.51226800  | 0.89617700  | -2.01296700 |
| C  | 6.80545200  | -1.43143800 | -0.56425000 |
| H  | 7.89759800  | -1.43196600 | -0.52017000 |
| H  | 6.44950200  | -2.25617600 | 0.06118100  |
| H  | 6.51758400  | -1.62704700 | -1.60188700 |
| C  | 6.77587800  | 0.13781100  | 1.36826800  |
| H  | 6.48120000  | 1.11692500  | 1.75648600  |
| H  | 6.37400700  | -0.62843500 | 2.03775500  |
| H  | 7.86802400  | 0.08254200  | 1.40147600  |

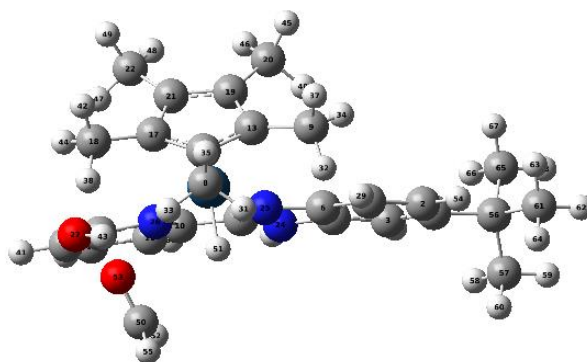

| <b>I<sub>2</sub></b>                           |                     |
|------------------------------------------------|---------------------|
| <b>SCF Done: E (RM062X)</b>                    | <b>-1468.124323</b> |
| <b>Thermal correction to Gibbs Free Energy</b> | <b>0.475170</b>     |

|    |             |             |             |
|----|-------------|-------------|-------------|
| C  | -4.85770800 | -0.01197500 | 0.27293600  |
| C  | -4.02987500 | -1.11989100 | 0.57932600  |
| C  | -4.26587800 | 1.20906100  | -0.04201500 |
| C  | -2.64728700 | -1.05459300 | 0.56297800  |
| C  | -2.87598700 | 1.27734900  | -0.05639600 |
| C  | -2.06228400 | 0.16417800  | 0.21927800  |
| C  | -0.74118700 | 1.83855800  | -0.16998900 |
| C  | 2.63071500  | -3.08997200 | 1.28090400  |
| C  | -0.17628600 | -3.45211600 | -0.15578800 |
| C  | 0.52371700  | 2.55684200  | -0.23478600 |
| C  | 0.65752000  | 3.89888000  | -0.52268400 |
| C  | 2.16068100  | -2.32649700 | 0.08454500  |
| C  | 0.86415900  | -2.44052200 | -0.52707000 |
| C  | 1.94276200  | 4.45511400  | -0.47723500 |
| C  | 2.78494700  | 2.31020300  | 0.19531200  |
| C  | 3.00936400  | 3.66843700  | -0.10701700 |
| C  | 2.93219500  | -1.41342300 | -0.70126000 |
| C  | 4.40029700  | -1.15157800 | -0.55276300 |
| C  | 0.89902800  | -1.69478100 | -1.78857400 |
| C  | -0.26316100 | -1.60191600 | -2.72667800 |
| C  | 2.14727400  | -1.06621100 | -1.88996000 |
| C  | 2.64412500  | -0.16268100 | -2.97459600 |
| Ir | 1.15482000  | -0.39345100 | 0.11145200  |
| N  | -2.00079500 | 2.32446300  | -0.29644400 |
| N  | -0.73884900 | 0.55275900  | 0.12132400  |
| N  | 1.57704000  | 1.75352000  | 0.07681900  |
| O  | 3.81225800  | 1.58986100  | 0.60281800  |
| H  | -4.86693300 | 2.08459200  | -0.26518900 |
| H  | -2.03261200 | -1.90383800 | 0.83319700  |
| H  | -2.25560000 | 3.28077700  | -0.49065100 |
| H  | 1.81353000  | -3.25811500 | 1.98510900  |
| H  | -0.31815000 | -3.50589300 | 0.92621600  |
| H  | 3.42915100  | -2.55809600 | 1.79929500  |
| H  | -1.13645200 | -3.22577600 | -0.62367100 |

|   |             |             |             |
|---|-------------|-------------|-------------|
| H | 3.01343300  | -4.06523900 | 0.96211700  |
| H | -0.20399300 | 4.50445800  | -0.77762300 |
| H | 0.13422700  | -4.44315300 | -0.50375100 |
| H | 4.71336400  | -1.19247700 | 0.49175000  |
| H | 2.09291600  | 5.50350400  | -0.71023600 |
| H | -1.18830600 | -1.39053300 | -2.18064300 |
| H | 4.01783200  | 4.05206400  | -0.01805500 |
| H | 4.95495100  | -1.91982700 | -1.10189400 |
| H | 3.54112400  | 0.73881000  | 1.01419100  |
| H | 4.68303500  | -0.17849000 | -0.95793700 |
| H | -0.39952400 | -2.54976900 | -3.25699800 |
| H | -0.11929300 | -0.81641600 | -3.47010000 |
| H | 3.12870800  | 0.72423400  | -2.55572400 |
| H | 1.83550400  | 0.16664600  | -3.62884000 |
| H | 3.38736500  | -0.68166500 | -3.58846300 |
| C | 3.24430100  | 0.00867700  | 3.54085100  |
| H | 1.10419100  | -0.31297600 | 1.67526900  |
| H | 2.48711400  | 0.81067500  | 3.49450300  |
| O | 3.85513700  | -0.33986100 | 2.55778600  |
| H | -4.49169900 | -2.06147100 | 0.84885100  |
| H | 3.41656800  | -0.46506800 | 4.52013900  |
| C | -6.38736200 | -0.11069300 | 0.28861700  |
| C | -6.94918400 | 0.88529800  | 1.31778800  |
| H | -6.68132700 | 1.91744100  | 1.07384400  |
| H | -8.04117400 | 0.82180600  | 1.33875200  |
| H | -6.57335200 | 0.66430100  | 2.32109400  |
| C | -6.87506100 | -1.51483600 | 0.65949900  |
| H | -7.96796300 | -1.53107800 | 0.64756300  |
| H | -6.52570100 | -2.26753800 | -0.05411500 |
| H | -6.55174800 | -1.80574700 | 1.66376000  |
| C | -6.92767400 | 0.23588800  | -1.10939900 |
| H | -6.65614200 | 1.25209600  | -1.40966000 |
| H | -6.53837900 | -0.45679400 | -1.86134600 |
| H | -8.01964200 | 0.16824600  | -1.11425500 |

TS<sub>2</sub>

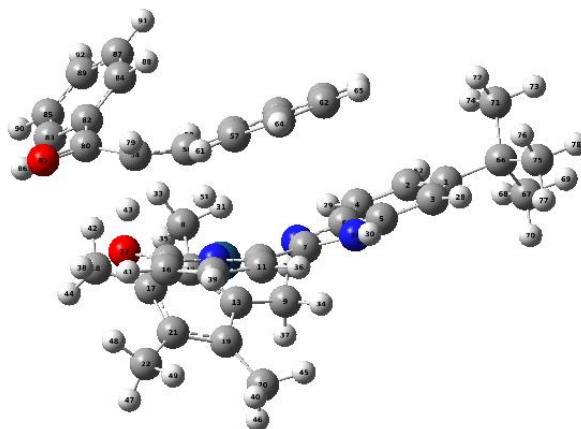

TS<sub>2</sub>

|                                                |                     |
|------------------------------------------------|---------------------|
| <b>SCF Done: E (RM062X)</b>                    | <b>-2007.106661</b> |
| <b>Thermal correction to Gibbs Free Energy</b> | <b>0.691667</b>     |

|    |             |             |             |
|----|-------------|-------------|-------------|
| C  | 5.08820300  | 0.98642800  | -0.41278700 |
| C  | 4.03333500  | 1.56271600  | -1.17163500 |
| C  | 4.82771400  | -0.13483000 | 0.36441100  |
| C  | 2.75232100  | 1.04956300  | -1.19444600 |
| C  | 3.53006400  | -0.64945500 | 0.34793300  |
| C  | 2.50337300  | -0.09334500 | -0.42802600 |
| C  | 1.62954200  | -1.70962900 | 0.72969700  |
| C  | -1.81182300 | 1.77641900  | -2.51009600 |
| C  | 0.66281900  | 0.10165200  | -3.75861600 |
| C  | 0.54985100  | -2.49507700 | 1.31963000  |
| C  | 0.68962000  | -3.47008500 | 2.28336900  |
| C  | -1.61401500 | 0.29345000  | -2.47324000 |
| C  | -0.50163000 | -0.44045000 | -2.99273000 |
| C  | -0.48582300 | -4.00729500 | 2.83479100  |
| C  | -1.79071000 | -2.46925700 | 1.49821800  |
| C  | -1.71323900 | -3.50880300 | 2.46106700  |
| C  | -2.56060800 | -0.65961100 | -1.91277000 |
| C  | -3.91725600 | -0.33447600 | -1.37894000 |
| C  | -0.73227400 | -1.85268200 | -2.75375600 |
| C  | 0.15699800  | -2.97083400 | -3.19219500 |
| C  | -2.01170000 | -1.97106000 | -2.10229300 |
| C  | -2.66087100 | -3.25079300 | -1.68498500 |
| Ir | -0.66604700 | -0.78179600 | -0.83086100 |
| N  | 2.94026200  | -1.68111900 | 1.05934900  |
| N  | 1.33785300  | -0.79077800 | -0.17552200 |
| N  | -0.65844900 | -2.06102900 | 0.88475800  |
| O  | -2.90741400 | -1.87850100 | 1.21185500  |
| H  | 5.59439000  | -0.59437800 | 0.97657600  |
| H  | 1.95459700  | 1.52399200  | -1.75551200 |
| H  | 3.37813100  | -2.23171500 | 1.78251900  |
| H  | -0.85582300 | 2.30271000  | -2.55234600 |
| H  | 0.72079400  | 1.18876300  | -3.68683000 |
| H  | -2.35449000 | 2.12471100  | -1.62594000 |
| H  | 1.60860000  | -0.32212000 | -3.41214400 |
| H  | -2.39626300 | 2.05534400  | -3.39265500 |
| H  | 1.66718000  | -3.80437800 | 2.60992400  |
| H  | 0.54470000  | -0.15533900 | -4.81624300 |
| H  | -4.17634300 | -0.95709400 | -0.52136500 |
| H  | -0.42139600 | -4.78916800 | 3.58429200  |
| H  | 0.03512900  | -3.84439000 | -2.54856500 |
| H  | -2.64021200 | -3.85258600 | 2.90343200  |
| H  | -3.96689900 | 0.71062900  | -1.07078900 |
| H  | -2.79991500 | -0.72229700 | 1.43963700  |
| H  | -4.66663300 | -0.48519300 | -2.16319100 |
| H  | 1.20695200  | -2.67040400 | -3.16524500 |
| H  | -0.08244100 | -3.27094600 | -4.21794300 |
| H  | -3.16245600 | -3.69995300 | -2.54823100 |

|   |             |             |             |
|---|-------------|-------------|-------------|
| H | -3.39881200 | -3.07291800 | -0.90203700 |
| H | -1.92368600 | -3.96743400 | -1.31410100 |
| C | -1.30232400 | 1.07333200  | 1.46573100  |
| H | -0.97071100 | 0.38072000  | 0.36749200  |
| H | 4.24305900  | 2.45311200  | -1.75508600 |
| H | -1.31673400 | 1.99187000  | 0.87767300  |
| C | -2.57168300 | 0.60764200  | 1.96517800  |
| C | -0.04169300 | 0.91772400  | 2.24880900  |
| C | 1.06514600  | 1.70155700  | 1.90318700  |
| C | 0.08940800  | -0.01353800 | 3.28484800  |
| C | 2.27532400  | 1.56478400  | 2.57311200  |
| H | 0.97608300  | 2.41647400  | 1.08785600  |
| C | 1.29939400  | -0.15029000 | 3.96017500  |
| H | -0.75116200 | -0.64184400 | 3.56620300  |
| C | 2.39459700  | 0.63575500  | 3.60616500  |
| H | 3.12482500  | 2.17649000  | 2.28466900  |
| H | 1.38212900  | -0.86826500 | 4.77019400  |
| H | 3.33463200  | 0.53380700  | 4.13954200  |
| C | 6.47299000  | 1.63487700  | -0.46994300 |
| C | 6.97176800  | 1.62879400  | -1.92560900 |
| H | 6.31268800  | 2.20049700  | -2.58481900 |
| H | 7.96703100  | 2.07987700  | -1.97935000 |
| H | 7.03747300  | 0.60733900  | -2.31157000 |
| C | 6.37483700  | 3.08463000  | 0.03502000  |
| H | 6.02361400  | 3.11405200  | 1.07112600  |
| H | 7.35981300  | 3.55934500  | -0.00537100 |
| H | 5.69263600  | 3.68420300  | -0.57388600 |
| C | 7.49328700  | 0.88848200  | 0.39435000  |
| H | 7.20924300  | 0.89179500  | 1.45173900  |
| H | 7.62016500  | -0.14831900 | 0.06658900  |
| H | 8.46591300  | 1.38055800  | 0.31398400  |
| H | -2.57741300 | 0.21121500  | 2.98054700  |
| C | -3.86202900 | 1.25696500  | 1.61979700  |
| O | -4.91545400 | 0.69072600  | 1.85923800  |
| C | -3.90760200 | 2.60567700  | 0.94210700  |
| C | -4.93994900 | 2.83766900  | 0.02702900  |
| C | -3.03518400 | 3.65028700  | 1.26337200  |
| C | -5.05690400 | 4.06863000  | -0.60827300 |
| H | -5.65496400 | 2.04093100  | -0.15652700 |
| C | -3.16575600 | 4.89116300  | 0.64453500  |
| H | -2.27966100 | 3.50923100  | 2.03196200  |
| C | -4.16420000 | 5.09548400  | -0.30491300 |
| H | -5.85414400 | 4.23547100  | -1.32515800 |
| H | -2.49734900 | 5.70256600  | 0.91329500  |
| H | -4.26126700 | 6.06105100  | -0.79059400 |



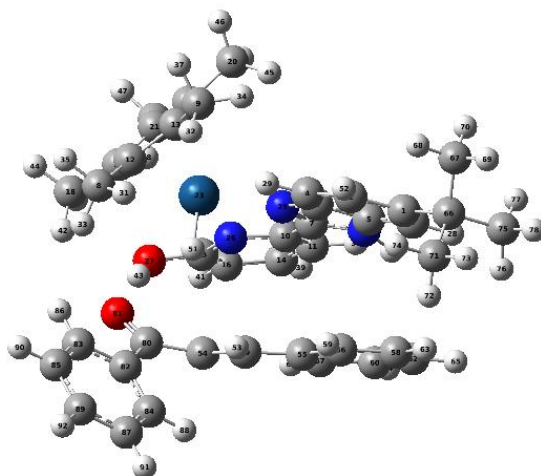

| <b>I<sub>3</sub></b>                           |                     |
|------------------------------------------------|---------------------|
| <b>SCF Done: E (RM062X)</b>                    | <b>-2007.180853</b> |
| <b>Thermal correction to Gibbs Free Energy</b> | <b>0.691260</b>     |

|    |             |             |             |
|----|-------------|-------------|-------------|
| C  | 4.7555900   | -0.34960700 | -1.15597200 |
| C  | 3.72343800  | -0.33650000 | -2.13418300 |
| C  | 4.42373000  | -0.56834700 | 0.17412500  |
| C  | 2.39319500  | -0.54382200 | -1.83110900 |
| C  | 3.07750600  | -0.77323700 | 0.48361900  |
| C  | 2.06795400  | -0.77824800 | -0.49050500 |
| C  | 1.10579300  | -1.03204800 | 1.43085200  |
| C  | -2.64321800 | -0.20592300 | -3.20036800 |
| C  | -0.25027300 | -2.35365400 | -3.31315300 |
| C  | 0.00138800  | -1.07279400 | 2.37713700  |
| C  | 0.13772300  | -1.33354200 | 3.72643600  |
| C  | -2.37250600 | -1.29126400 | -2.20782500 |
| C  | -1.27797700 | -2.22146600 | -2.23334800 |
| C  | -1.01217300 | -1.27871100 | 4.52156200  |
| C  | -2.26651600 | -0.65244000 | 2.56389700  |
| C  | -2.21321600 | -0.92362400 | 3.94608200  |
| C  | -3.19163500 | -1.61454300 | -1.07343200 |
| C  | -4.52618200 | -1.00675200 | -0.76676100 |
| C  | -1.50959600 | -3.22657100 | -1.19416800 |
| C  | -0.61588700 | -4.40259300 | -0.95344300 |
| C  | -2.66142800 | -2.84918600 | -0.48903400 |
| C  | -3.25839500 | -3.52393700 | 0.70512100  |
| Ir | -1.19077300 | -1.04629000 | -0.41670500 |
| N  | 2.43270000  | -0.95382900 | 1.69419800  |
| N  | 0.85243100  | -0.96262000 | 0.13960800  |
| N  | -1.18590100 | -0.78467600 | 1.78267100  |
| O  | -3.41663500 | -0.27023300 | 2.04555700  |
| H  | 5.17147500  | -0.57114700 | 0.95849800  |
| H  | 1.61818600  | -0.50222400 | -2.58726600 |
| H  | 2.83388600  | -0.76944700 | 2.60412100  |

|   |             |             |             |
|---|-------------|-------------|-------------|
| H | -1.71932100 | 0.16347600  | -3.64880300 |
| H | -0.09366600 | -1.40541700 | -3.83143900 |
| H | -3.14257400 | 0.63677800  | -2.72030000 |
| H | 0.70845500  | -2.69597200 | -2.91599200 |
| H | -3.29017000 | -0.58372300 | -3.99876000 |
| H | 1.10594200  | -1.58168300 | 4.14564400  |
| H | -0.58734700 | -3.08729500 | -4.05335100 |
| H | -4.82891300 | -1.21186400 | 0.26102400  |
| H | -0.95607700 | -1.49300700 | 5.58337200  |
| H | -0.82207600 | -4.87294800 | 0.00952300  |
| H | -3.12890300 | -0.82388500 | 4.51554400  |
| H | -4.50652900 | 0.07727400  | -0.89816300 |
| H | -3.30084900 | 0.40752100  | 1.31081800  |
| H | -5.28672700 | -1.42393000 | -1.43527300 |
| H | 0.43676800  | -4.10558700 | -0.96879100 |
| H | -0.75823300 | -5.15812700 | -1.73302800 |
| H | -4.09897400 | -4.15577900 | 0.40045100  |
| H | -3.64209100 | -2.78434000 | 1.41236900  |
| H | -2.52880200 | -4.15261400 | 1.21909100  |
| C | 0.02629700  | 2.55066600  | 1.05354100  |
| H | -1.01330900 | 0.48192400  | -0.66738900 |
| H | 3.99143100  | -0.14520800 | -3.16828000 |
| H | 0.27091800  | 2.83396200  | 0.03037200  |
| C | -1.26898100 | 2.44524800  | 1.38731400  |
| C | 1.18279100  | 2.26677400  | 1.91471300  |
| C | 2.46753400  | 2.36518300  | 1.36407800  |
| C | 1.05677100  | 1.90408400  | 3.26493100  |
| C | 3.59878200  | 2.12526400  | 2.13937400  |
| H | 2.57887500  | 2.63325900  | 0.31641600  |
| C | 2.18368200  | 1.65232300  | 4.03650500  |
| H | 0.07292100  | 1.81893600  | 3.71797700  |
| C | 3.46097800  | 1.76755300  | 3.47821200  |
| H | 4.58463600  | 2.21761200  | 1.69433300  |
| H | 2.07031000  | 1.38667800  | 5.08310500  |
| H | 4.33999100  | 1.59507800  | 4.09161800  |
| C | 6.19757500  | -0.10221700 | -1.60360500 |
| C | 6.60371100  | -1.18031000 | -2.62278300 |
| H | 5.96551900  | -1.16255700 | -3.51027500 |
| H | 7.63453000  | -1.01410700 | -2.95010300 |
| H | 6.54096900  | -2.17825200 | -2.17906200 |
| C | 6.29088200  | 1.28735200  | -2.25708800 |
| H | 5.99620300  | 2.07012800  | -1.55075100 |
| H | 7.31954200  | 1.48268700  | -2.57499200 |
| H | 5.64909100  | 1.36624200  | -3.13865100 |
| C | 7.18035400  | -0.15203600 | -0.43048100 |
| H | 6.96205800  | 0.62052600  | 0.31466400  |
| H | 7.17106800  | -1.12870200 | 0.06384900  |
| H | 8.19467600  | 0.02320300  | -0.79819700 |
| H | -1.58551100 | 2.10150200  | 2.36950700  |
| C | -2.36031200 | 2.56660700  | 0.39350900  |
| O | -3.29548400 | 1.76344900  | 0.43261600  |
| C | -2.33977200 | 3.61409500  | -0.65725500 |
| C | -3.19603200 | 3.44899100  | -1.75340900 |
| C | -1.55115700 | 4.76705100  | -0.56206300 |

|   |             |            |             |
|---|-------------|------------|-------------|
| C | -3.23625500 | 4.40175100 | -2.75993000 |
| H | -3.83273300 | 2.57148300 | -1.78541800 |
| C | -1.60152000 | 5.72597300 | -1.56877500 |
| H | -0.92509400 | 4.92871500 | 0.30867900  |
| C | -2.43443000 | 5.54020700 | -2.66896400 |
| H | -3.89723200 | 4.26796100 | -3.60952500 |
| H | -0.99856000 | 6.62408600 | -1.48972100 |
| H | -2.47097800 | 6.29075500 | -3.45202100 |

I<sub>4</sub>

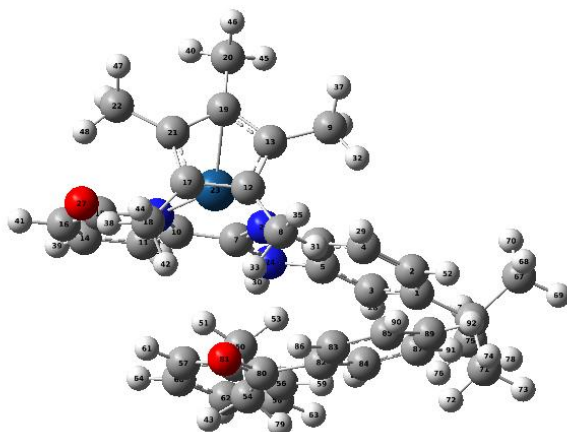

| <b>I<sub>4</sub></b>                           |                     |
|------------------------------------------------|---------------------|
| <b>SCF Done: E (RM062X)</b>                    | <b>-2007.185509</b> |
| <b>Thermal correction to Gibbs Free Energy</b> | <b>0.695661</b>     |

|   |             |             |             |
|---|-------------|-------------|-------------|
| C | 3.95051400  | -1.07226900 | -1.55703900 |
| C | 3.30758700  | 0.19004500  | -1.63745800 |
| C | 3.18823400  | -2.20010500 | -1.27582000 |
| C | 1.94657300  | 0.35762400  | -1.45856300 |
| C | 1.81905500  | -2.02769200 | -1.07896000 |
| C | 1.18800400  | -0.78167400 | -1.18169500 |
| C | -0.31185400 | -2.22965800 | -0.53876600 |
| C | -0.60887300 | 3.15273500  | 0.01314600  |
| C | -0.62280700 | 2.18323600  | -3.05783200 |
| C | -1.59676800 | -2.65981500 | -0.01121600 |
| C | -1.89755700 | -3.93863000 | 0.34415700  |
| C | -1.67393800 | 2.35962100  | -0.66454900 |
| C | -1.67144100 | 1.93472200  | -2.01880400 |
| C | -3.15892300 | -4.17168300 | 0.97023200  |
| C | -3.64870200 | -1.75770000 | 0.84657800  |
| C | -3.99121100 | -3.13059100 | 1.21850400  |
| C | -2.95309300 | 1.96307900  | -0.05943800 |
| C | -3.35750400 | 2.21829200  | 1.35324000  |
| C | -2.91240700 | 1.23080500  | -2.24969100 |
| C | -3.32677100 | 0.61507100  | -3.54254400 |
| C | -3.73505900 | 1.32184600  | -1.06113400 |

|    |             |             |             |
|----|-------------|-------------|-------------|
| C  | -5.15875700 | 0.87529200  | -0.98831700 |
| Ir | -1.88607600 | 0.18935200  | -0.70571000 |
| N  | 0.83092800  | -2.92190000 | -0.69007200 |
| N  | -0.15197200 | -0.94853600 | -0.85967500 |
| N  | -2.44079600 | -1.58797100 | 0.16373300  |
| O  | -4.36485900 | -0.79948300 | 1.11280700  |
| H  | 3.63413600  | -3.18258100 | -1.17910100 |
| H  | 1.48619000  | 1.33735000  | -1.51030200 |
| H  | 0.99334100  | -3.85266000 | -0.32837200 |
| H  | 0.39402600  | 2.78909100  | -0.22681300 |
| H  | 0.21104200  | 2.75280800  | -2.64409700 |
| H  | -0.72814500 | 3.13554700  | 1.09686500  |
| H  | -0.23431000 | 1.25218200  | -3.47936700 |
| H  | -0.67224300 | 4.19726500  | -0.31194300 |
| H  | -1.19391000 | -4.74615900 | 0.17935100  |
| H  | -1.05219600 | 2.77105000  | -3.87484500 |
| H  | -4.00657600 | 1.41291300  | 1.70049100  |
| H  | -3.43791600 | -5.18078700 | 1.25556400  |
| H  | -4.02888000 | -0.20462500 | -3.38051000 |
| H  | -4.94953100 | -3.25889500 | 1.70775200  |
| H  | -2.48647200 | 2.27838700  | 2.01157700  |
| H  | 0.68092300  | 0.65803200  | 4.28396900  |
| H  | -3.89268300 | 3.17192100  | 1.41503200  |
| H  | -2.46351300 | 0.23880900  | -4.09533600 |
| H  | -3.82414200 | 1.37201900  | -4.15943000 |
| H  | -5.74679700 | 1.47867500  | -1.68797400 |
| H  | -5.55840600 | 0.99194400  | 0.01610900  |
| H  | -5.26277100 | -0.17733400 | -1.25863200 |
| C  | 0.59101100  | 0.05895300  | 2.19744800  |
| H  | -0.50235300 | 0.15356100  | 2.21398600  |
| H  | 3.90764500  | 1.06992500  | -1.84704500 |
| H  | 0.93301500  | 0.46938900  | 1.23673300  |
| C  | 1.17476300  | 0.91218300  | 3.34370100  |
| C  | 0.99684600  | -1.38986000 | 2.28851400  |
| C  | 2.30508000  | -1.76992200 | 1.96771900  |
| C  | 0.09662200  | -2.37317900 | 2.70375300  |
| C  | 2.70358800  | -3.09985400 | 2.05171600  |
| H  | 3.01293800  | -1.01671200 | 1.62299300  |
| C  | 0.48742200  | -3.70877200 | 2.78076200  |
| H  | -0.92448400 | -2.09326900 | 2.95475500  |
| C  | 1.79151200  | -4.07713800 | 2.45350300  |
| H  | 3.72462400  | -3.37410600 | 1.80229900  |
| H  | -0.22598400 | -4.45917100 | 3.10784000  |
| H  | 2.10247300  | -5.11418100 | 2.53282100  |
| C  | 5.46635300  | -1.14369000 | -1.75285900 |
| C  | 5.82762700  | -0.60382600 | -3.14705600 |
| H  | 5.52358800  | 0.43903900  | -3.27221900 |
| H  | 6.91028400  | -0.65469400 | -3.29657700 |
| H  | 5.34533200  | -1.19470700 | -3.93110700 |
| C  | 6.15034700  | -0.28646100 | -0.67386100 |
| H  | 5.89084700  | -0.64043500 | 0.32924700  |
| H  | 7.23740800  | -0.34110000 | -0.78457800 |
| H  | 5.86212900  | 0.76609800  | -0.74984100 |
| C  | 5.99353200  | -2.57696900 | -1.63707700 |

|   |             |             |             |
|---|-------------|-------------|-------------|
| H | 5.80233100  | -3.00038900 | -0.64532800 |
| H | 5.54943300  | -3.23391900 | -2.39157300 |
| H | 7.07537900  | -2.57945900 | -1.79227500 |
| H | 2.24647500  | 0.72438700  | 3.44974400  |
| C | 0.88180900  | 2.36210700  | 3.02833800  |
| O | -0.18603000 | 2.85312500  | 3.34863800  |
| C | 1.85357200  | 3.14485100  | 2.19850500  |
| C | 1.63060300  | 4.51878500  | 2.05335700  |
| C | 2.90891100  | 2.54153500  | 1.50632500  |
| C | 2.45017000  | 5.27928700  | 1.22957500  |
| H | 0.80478000  | 4.96759600  | 2.59655100  |
| C | 3.71957000  | 3.30285700  | 0.66799400  |
| H | 3.09905000  | 1.47622300  | 1.60045400  |
| C | 3.49285000  | 4.66996500  | 0.53065900  |
| H | 2.28185000  | 6.34662200  | 1.13145000  |
| H | 4.53785200  | 2.82922700  | 0.13478800  |
| H | 4.13314200  | 5.26433000  | -0.11313600 |

TS<sub>3</sub>

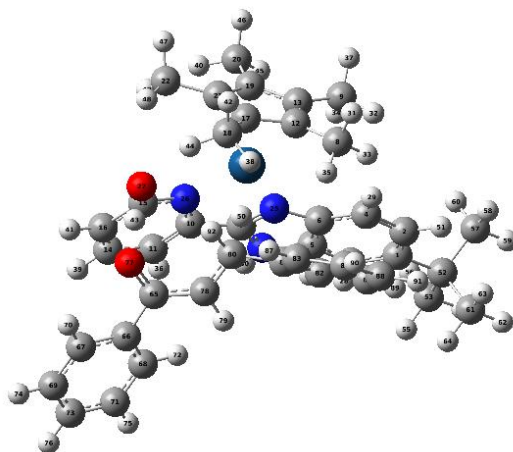

| TS <sub>3</sub>                         |              |
|-----------------------------------------|--------------|
| SCF Done: E (RM062X)                    | -2007.143382 |
| Thermal correction to Gibbs Free Energy | 0.691075     |

|   |             |             |             |
|---|-------------|-------------|-------------|
| C | -4.78155700 | 2.02417800  | -0.31278300 |
| C | -4.48404900 | 0.87291300  | 0.46719100  |
| C | -3.82615900 | 2.51050300  | -1.19597700 |
| C | -3.28942100 | 0.18912600  | 0.37517100  |
| C | -2.61249100 | 1.82438200  | -1.28434100 |
| C | -2.34418700 | 0.66784500  | -0.53828500 |
| C | -0.56492700 | 1.09865700  | -1.70712500 |
| C | -1.24931800 | -3.15272000 | 2.01528900  |
| C | -2.85309100 | -2.94434200 | -0.78734200 |
| C | 0.84175600  | 0.97890900  | -2.06738300 |
| C | 1.58094500  | 1.94479800  | -2.71751500 |

|    |             |             |             |
|----|-------------|-------------|-------------|
| C  | -0.66123500 | -3.16490000 | 0.63992900  |
| C  | -1.37478700 | -3.09328900 | -0.60380100 |
| C  | 2.97199000  | 1.77524100  | -2.77226000 |
| C  | 2.73565900  | -0.25073000 | -1.46847300 |
| C  | 3.54762600  | 0.69706700  | -2.14062500 |
| C  | 0.74221000  | -3.39356900 | 0.31854700  |
| C  | 1.84488000  | -3.59056500 | 1.30763500  |
| C  | -0.44512000 | -3.24174200 | -1.68738300 |
| C  | -0.78667200 | -3.30887300 | -3.14108000 |
| C  | 0.86710200  | -3.43163900 | -1.10555900 |
| C  | 2.10788000  | -3.70854700 | -1.89201500 |
| Ir | 0.12690500  | -1.46292500 | -0.47014100 |
| N  | -1.45951100 | 2.06931600  | -2.01469900 |
| N  | -1.06698400 | 0.23527900  | -0.84085700 |
| N  | 1.39380000  | -0.13543900 | -1.51900700 |
| O  | 3.24602200  | -1.19599100 | -0.73198600 |
| H  | -4.00426000 | 3.39590500  | -1.79399200 |
| H  | -3.06228800 | -0.66839200 | 0.99979900  |
| H  | -1.30862900 | 2.83489200  | -2.65391100 |
| H  | -1.42167600 | -4.17687500 | 2.36242600  |
| H  | -3.36611900 | -2.80784300 | 0.16475500  |
| H  | -2.20407800 | -2.62369400 | 2.03508800  |
| H  | -3.09908500 | -2.09918100 | -1.43573700 |
| H  | -0.58703900 | -2.65420400 | 2.72669800  |
| H  | 1.10759400  | 2.82716100  | -3.13203100 |
| H  | -3.24797700 | -3.85316700 | -1.25211900 |
| H  | 1.59410400  | -3.12054800 | 2.26280600  |
| H  | 3.59215100  | 2.51442800  | -3.26767400 |
| H  | 0.04320500  | -2.95649600 | -3.75692600 |
| H  | 4.62152000  | 0.56198100  | -2.09326300 |
| H  | 2.00592100  | -4.65763100 | 1.49048000  |
| H  | 3.83357000  | -0.64545400 | 0.07601500  |
| H  | 2.77527200  | -3.15463800 | 0.93542100  |
| H  | -1.66538100 | -2.70146800 | -3.36898000 |
| H  | -1.00611700 | -4.34158800 | -3.43418800 |
| H  | 2.07295600  | -4.73866600 | -2.26147000 |
| H  | 3.00233200  | -3.57445200 | -1.28681800 |
| H  | 2.18384800  | -3.04226300 | -2.75537000 |
| H  | 0.87532300  | -0.61437700 | 0.78000700  |
| H  | -5.22894600 | 0.51737300  | 1.17161000  |
| C  | -6.14488700 | 2.69743500  | -0.13958300 |
| C  | -6.30625300 | 3.91224700  | -1.05827200 |
| H  | -7.29352700 | 4.35533400  | -0.90443700 |
| H  | -5.56163700 | 4.68564700  | -0.84378600 |
| H  | -6.23069600 | 3.63307400  | -2.11419300 |
| C  | -7.25356200 | 1.68511800  | -0.47521100 |
| H  | -7.22520500 | 0.81381500  | 0.18492300  |
| H  | -8.23369500 | 2.15728300  | -0.36024200 |
| H  | -7.16154900 | 1.33319100  | -1.50702500 |
| C  | -6.29723600 | 3.16606500  | 1.31780000  |
| H  | -7.26970100 | 3.64891400  | 1.45227200  |
| H  | -6.23990100 | 2.33245500  | 2.02329900  |
| H  | -5.51742100 | 3.88773900  | 1.57881400  |
| C  | 3.55255300  | 1.24670400  | 1.00282600  |

|   |             |             |             |
|---|-------------|-------------|-------------|
| C | 4.15737600  | 2.57642500  | 0.72456800  |
| C | 5.55257200  | 2.68412900  | 0.71728000  |
| C | 3.38023800  | 3.70006500  | 0.41840700  |
| C | 6.15947300  | 3.90207000  | 0.43741500  |
| H | 6.14095400  | 1.80118200  | 0.94122800  |
| C | 3.99039600  | 4.91387500  | 0.12443500  |
| H | 2.29808200  | 3.62235000  | 0.38077500  |
| C | 5.37982900  | 5.01890800  | 0.14124800  |
| H | 7.24125500  | 3.98278700  | 0.44979700  |
| H | 3.38371200  | 5.78024500  | -0.11769000 |
| H | 5.85449100  | 5.96971400  | -0.07837700 |
| O | 4.31467000  | 0.22821500  | 0.84426600  |
| C | 2.21977800  | 1.15390400  | 1.45951900  |
| H | 1.65431300  | 2.05984600  | 1.64176900  |
| C | 1.67490000  | -0.08119600 | 1.84572300  |
| C | 0.61804700  | -0.16817000 | 2.89511400  |
| C | -0.62916500 | 0.44205400  | 2.73540200  |
| C | 0.88587800  | -0.88328400 | 4.06455100  |
| C | -1.59597300 | 0.33330200  | 3.72772800  |
| H | -0.84373300 | 0.97991300  | 1.81464200  |
| C | -0.08183100 | -0.98584500 | 5.06337700  |
| H | 1.85862700  | -1.34975400 | 4.19801100  |
| C | -1.32470800 | -0.38351100 | 4.89427000  |
| H | -2.56426100 | 0.80497800  | 3.58911300  |
| H | 0.13771200  | -1.53896300 | 5.97049300  |
| H | -2.08024100 | -0.47064600 | 5.66788100  |
| H | 2.39112600  | -0.90458200 | 1.85423300  |

I<sub>5</sub>

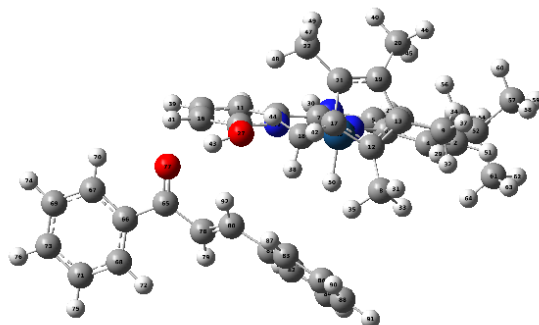

| I <sub>5</sub>                          |              |
|-----------------------------------------|--------------|
| SCF Done: E (RM062X)                    | -2007.253181 |
| Thermal correction to Gibbs Free Energy | 0.676293     |

|   |             |             |            |
|---|-------------|-------------|------------|
| C | -5.83303000 | 1.71006500  | 1.10291700 |
| C | -5.41678400 | 0.35927600  | 1.24910900 |
| C | -4.95368500 | 2.63017900  | 0.54987000 |
| C | -4.17877300 | -0.09820700 | 0.84717400 |

|    |             |             |             |
|----|-------------|-------------|-------------|
| C  | -3.69892600 | 2.16801600  | 0.14659000  |
| C  | -3.30699600 | 0.82480500  | 0.25916400  |
| C  | -1.63565600 | 1.90332900  | -0.59270200 |
| C  | -0.06426500 | -3.74380200 | 0.80593300  |
| C  | -3.04859400 | -3.19206200 | -0.21773000 |
| C  | -0.27344600 | 2.12128600  | -1.05026700 |
| C  | 0.25298100  | 3.36639200  | -1.33723300 |
| C  | -0.45967300 | -3.03255900 | -0.44885500 |
| C  | -1.79121500 | -2.70733400 | -0.86966100 |
| C  | 1.60114700  | 3.43825100  | -1.69326200 |
| C  | 1.73775800  | 1.04823900  | -1.43554900 |
| C  | 2.34987100  | 2.28283700  | -1.74158600 |
| C  | 0.44147100  | -2.58803400 | -1.46904700 |
| C  | 1.89548800  | -2.93864100 | -1.52041800 |
| C  | -1.71661600 | -2.16644900 | -2.22833600 |
| C  | -2.91361800 | -1.74370200 | -3.02176200 |
| C  | -0.36210100 | -2.09015100 | -2.58608700 |
| C  | 0.22538800  | -1.55653400 | -3.85454800 |
| Ir | -0.63395300 | -0.87683400 | -0.61958700 |
| N  | -2.61046900 | 2.82639900  | -0.39426900 |
| N  | -2.02077900 | 0.69565400  | -0.23313300 |
| N  | 0.44393800  | 0.97127500  | -1.10040900 |
| O  | 2.39760000  | -0.09143200 | -1.48252200 |
| H  | -5.21735200 | 3.67482800  | 0.43712100  |
| H  | -3.87223300 | -1.12342800 | 1.00269500  |
| H  | -2.55124200 | 3.81196200  | -0.59773800 |
| H  | 0.01162000  | -4.82055000 | 0.61842000  |
| H  | -2.97597300 | -3.16196100 | 0.87185400  |
| H  | -0.79571900 | -3.58249700 | 1.60011400  |
| H  | -3.91555000 | -2.60644100 | -0.52997800 |
| H  | 0.90380200  | -3.38647400 | 1.16309000  |
| H  | -0.35762400 | 4.25925800  | -1.27765600 |
| H  | -3.23041900 | -4.23172300 | -0.51125100 |
| H  | 2.36562000  | -2.77301700 | -0.54913000 |
| H  | 2.05623800  | 4.39395700  | -1.92966800 |
| H  | -2.62754800 | -1.16479100 | -3.90137600 |
| H  | 3.39837200  | 2.28845500  | -2.01464600 |
| H  | 2.00221800  | -3.99884600 | -1.77638000 |
| H  | 3.38603300  | 0.07553000  | -1.43181100 |
| H  | 2.42581800  | -2.34774100 | -2.26634300 |
| H  | -3.58707000 | -1.12969800 | -2.41554300 |
| H  | -3.47717400 | -2.61844000 | -3.36269100 |
| H  | 0.54267800  | -2.38143700 | -4.50093500 |
| H  | 1.10572100  | -0.94514300 | -3.63894800 |
| H  | -0.49214800 | -0.94924500 | -4.40897300 |
| H  | -0.14643600 | -0.65073600 | 0.85226100  |
| H  | -6.10144100 | -0.34651500 | 1.70820400  |
| C  | -7.23277200 | 2.10575900  | 1.57686600  |
| C  | -7.51900000 | 3.59243300  | 1.34459600  |
| H  | -8.52921200 | 3.82599200  | 1.69072700  |
| H  | -6.82444100 | 4.22980000  | 1.90130800  |
| H  | -7.46449900 | 3.85460300  | 0.28304500  |
| C  | -8.27787900 | 1.28336100  | 0.80370000  |
| H  | -8.15518200 | 0.20978400  | 0.97076400  |



|   |             |             |             |
|---|-------------|-------------|-------------|
| H | -9.28477600 | 1.55907300  | 1.13151700  |
| H | -8.20358100 | 1.47116100  | -0.27156600 |
| C | -7.35951700 | 1.81688800  | 3.08241800  |
| H | -8.35680000 | 2.10056700  | 3.43204900  |
| H | -7.21657500 | 0.75659200  | 3.30786600  |
| H | -6.62057300 | 2.38788500  | 3.65240400  |
| C | 5.03637500  | 0.90958200  | 0.11981400  |
| C | 5.95320200  | 2.01947100  | 0.46914800  |
| C | 6.43679500  | 2.83088900  | -0.56527400 |
| C | 6.35919200  | 2.26107100  | 1.78685500  |
| C | 7.29846800  | 3.88084900  | -0.28355100 |
| H | 6.13402300  | 2.61294200  | -1.58404200 |
| C | 7.22680100  | 3.31088900  | 2.06530700  |
| H | 6.02227900  | 1.62023200  | 2.59462800  |
| C | 7.69115500  | 4.12274000  | 1.03309900  |
| H | 7.67086800  | 4.50872600  | -1.08578500 |
| H | 7.54566400  | 3.49232500  | 3.08590000  |
| H | 8.36722100  | 4.94243200  | 1.25373700  |
| O | 4.85062000  | 0.62217300  | -1.07250100 |
| C | 4.34812100  | 0.15477400  | 1.18233900  |
| H | 4.16173700  | 0.63349900  | 2.13753100  |
| C | 4.02282800  | -1.13294300 | 0.97179300  |
| C | 3.34287800  | -2.01768400 | 1.92076400  |
| C | 2.44079000  | -1.52487200 | 2.87427100  |
| C | 3.60491900  | -3.39428800 | 1.87710600  |
| C | 1.83617900  | -2.38903600 | 3.77851800  |
| H | 2.19584000  | -0.46702800 | 2.88484200  |
| C | 3.01133000  | -4.25549300 | 2.79326900  |
| H | 4.29378200  | -3.78253800 | 1.13138400  |
| C | 2.12770100  | -3.75301000 | 3.74660400  |
| H | 1.13329100  | -2.00049200 | 4.50780100  |
| H | 3.23538900  | -5.31643700 | 2.76278600  |
| H | 1.65991000  | -4.42457000 | 4.45905600  |
| H | 4.33546700  | -1.58230100 | 0.02825900  |

I<sub>6</sub>

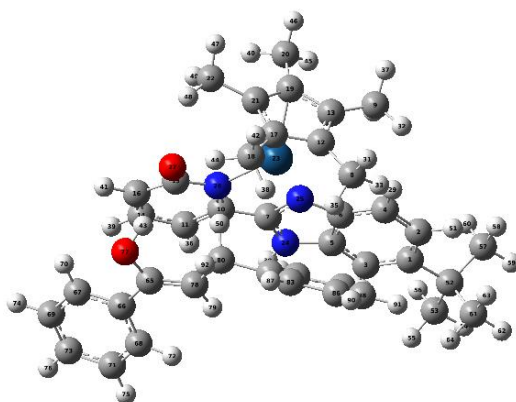

I<sub>6</sub>

|                                                |                     |
|------------------------------------------------|---------------------|
| <b>SCF Done: E (RM062X)</b>                    | <b>-2007.248062</b> |
| <b>Thermal correction to Gibbs Free Energy</b> | <b>0.671993</b>     |

|    |             |             |             |
|----|-------------|-------------|-------------|
| C  | -4.67564100 | 2.30358200  | -0.45578500 |
| C  | -4.65833100 | 0.97346900  | 0.03713500  |
| C  | -3.52880000 | 2.81639700  | -1.05041700 |
| C  | -3.55446800 | 0.14695400  | -0.05471700 |
| C  | -2.41478100 | 1.98192100  | -1.13834300 |
| C  | -2.41188200 | 0.66186800  | -0.66960500 |
| C  | -0.40923200 | 1.09006400  | -1.42876100 |
| C  | -1.60928300 | -2.76352600 | 2.14876200  |
| C  | -3.07321600 | -3.20446200 | -0.72661000 |
| C  | 1.00912900  | 0.85132700  | -1.63940300 |
| C  | 1.86817000  | 1.73588700  | -2.21964100 |
| C  | -0.96723700 | -3.09433900 | 0.84368000  |
| C  | -1.61053200 | -3.25616900 | -0.41306800 |
| C  | 3.23675200  | 1.35835400  | -2.32961900 |
| C  | 2.73386800  | -0.69337200 | -1.07780400 |
| C  | 3.64888700  | 0.18008700  | -1.79812700 |
| C  | 0.46465000  | -3.36980900 | 0.66281100  |
| C  | 1.47939200  | -3.40401600 | 1.75409900  |
| C  | -0.58083700 | -3.53470100 | -1.38977900 |
| C  | -0.81277600 | -3.76983700 | -2.84379600 |
| C  | 0.69004100  | -3.67683900 | -0.70522200 |
| C  | 1.95474700  | -4.13695600 | -1.35203800 |
| Ir | -0.11859900 | -1.64681700 | -0.53745500 |
| N  | -1.13045300 | 2.21121000  | -1.61763300 |
| N  | -1.14714500 | 0.12922800  | -0.88074000 |
| N  | 1.38504300  | -0.37234200 | -1.13537200 |
| O  | 3.12453600  | -1.66651700 | -0.41842000 |
| H  | -3.48743800 | 3.83141600  | -1.42641000 |
| H  | -3.55884000 | -0.85337500 | 0.35854900  |
| H  | -0.77939400 | 3.08040300  | -1.99268300 |
| H  | -1.81761200 | -3.68766400 | 2.69864800  |
| H  | -3.66353200 | -3.00758700 | 0.16927100  |
| H  | -2.54847900 | -2.22518600 | 2.00834000  |
| H  | -3.30595500 | -2.44214600 | -1.47487000 |
| H  | -0.95807700 | -2.13776300 | 2.76339700  |
| H  | 1.52289100  | 2.69151800  | -2.59645400 |
| H  | -3.38931500 | -4.17453400 | -1.12196900 |
| H  | 1.19039100  | -2.74823900 | 2.57890000  |
| H  | 3.94600100  | 2.03005000  | -2.80176200 |
| H  | 0.05866600  | -3.48053100 | -3.43373200 |
| H  | 4.68706900  | -0.12980000 | -1.81275900 |
| H  | 1.55223900  | -4.42667300 | 2.13980700  |
| H  | 4.27753200  | -0.54960700 | 0.90302000  |
| H  | 2.45274200  | -3.09255100 | 1.37278300  |
| H  | -1.68126600 | -3.21262200 | -3.20025900 |
| H  | -0.99808300 | -4.83656400 | -3.01217000 |
| H  | 1.85777200  | -5.20166700 | -1.58951200 |
| H  | 2.81210900  | -3.98375700 | -0.70092000 |

|   |             |             |             |
|---|-------------|-------------|-------------|
| H | 2.14648900  | -3.59498500 | -2.28094200 |
| H | 2.08789000  | -0.82342900 | 1.45187200  |
| H | -5.55163000 | 0.58696400  | 0.51691400  |
| C | -5.95257400 | 3.13275000  | -0.30092300 |
| C | -5.79988600 | 4.53666700  | -0.89359000 |
| H | -6.73590000 | 5.08644600  | -0.76691200 |
| H | -5.01249000 | 5.10628900  | -0.38952600 |
| H | -5.57951200 | 4.50178000  | -1.96533600 |
| C | -7.10776700 | 2.42055200  | -1.02576600 |
| H | -7.30135800 | 1.42889800  | -0.60741700 |
| H | -8.02576700 | 3.00742500  | -0.92687800 |
| H | -6.88851400 | 2.30441100  | -2.09119100 |
| C | -6.28776300 | 3.26816700  | 1.19454700  |
| H | -7.19747100 | 3.86329400  | 1.31795000  |
| H | -6.46108800 | 2.29519900  | 1.66256100  |
| H | -5.47639300 | 3.76653800  | 1.73325100  |
| C | 3.91340800  | 1.33828100  | 1.08144300  |
| C | 4.48953100  | 2.58639800  | 0.52712400  |
| C | 5.65097000  | 2.52233100  | -0.25142600 |
| C | 3.88907500  | 3.83417600  | 0.73664800  |
| C | 6.18000200  | 3.67153600  | -0.83133900 |
| H | 6.13460100  | 1.56212200  | -0.39089800 |
| C | 4.41483100  | 4.97940800  | 0.15139300  |
| H | 3.02099100  | 3.91807200  | 1.38250900  |
| C | 5.55916600  | 4.90280000  | -0.64065000 |
| H | 7.08412500  | 3.60597700  | -1.42829000 |
| H | 3.94104400  | 5.93969700  | 0.32854200  |
| H | 5.97324900  | 5.79995100  | -1.08894000 |
| O | 4.77017800  | 0.28048300  | 1.00553200  |
| C | 2.67806100  | 1.22937700  | 1.59826700  |
| H | 2.03111200  | 2.09855200  | 1.60255500  |
| C | 2.17123800  | -0.04306700 | 2.22436300  |
| C | 0.82549900  | 0.08229900  | 2.89935600  |
| C | -0.24366900 | 0.70934100  | 2.24894600  |
| C | 0.60227900  | -0.45270700 | 4.17067300  |
| C | -1.50000500 | 0.79478000  | 2.84399900  |
| H | -0.07487300 | 1.15831400  | 1.27331600  |
| C | -0.65287200 | -0.36854100 | 4.77403600  |
| H | 1.42514800  | -0.92637500 | 4.70022800  |
| C | -1.70853700 | 0.25303600  | 4.11177300  |
| H | -2.31121800 | 1.29903800  | 2.32591200  |
| H | -0.80016300 | -0.77987000 | 5.76755000  |
| H | -2.68154300 | 0.32974500  | 4.58586500  |
| H | 2.90848000  | -0.42148400 | 2.94571300  |

TS4

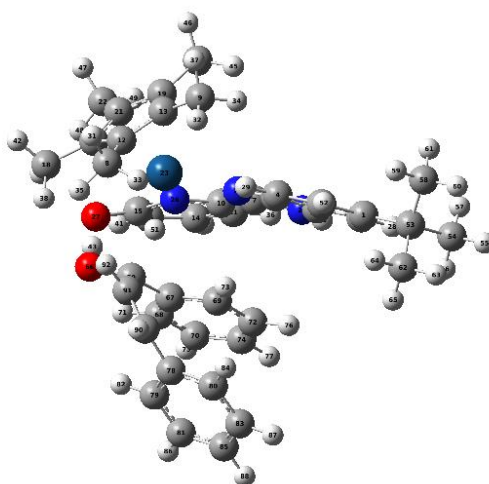

| <b>TS4</b>                                     |                     |
|------------------------------------------------|---------------------|
| <b>SCF Done: E (RM062X)</b>                    | <b>-2007.139269</b> |
| <b>Thermal correction to Gibbs Free Energy</b> | <b>0.694404</b>     |

|    |             |             |             |
|----|-------------|-------------|-------------|
| C  | 4.32562900  | -2.13187900 | 0.26608300  |
| C  | 3.51847200  | -2.19656500 | -0.90097500 |
| C  | 3.75118000  | -1.72780200 | 1.46504200  |
| C  | 2.17240900  | -1.88850300 | -0.90608600 |
| C  | 2.39190000  | -1.40919800 | 1.46066900  |
| C  | 1.59753500  | -1.50073100 | 0.30808400  |
| C  | 0.32923000  | -0.74409700 | 1.90239900  |
| C  | -1.84611500 | -1.27506100 | -3.60670700 |
| C  | -0.61995300 | -3.68977500 | -1.89814000 |
| C  | -0.84659000 | -0.09745200 | 2.47082900  |
| C  | -0.97127600 | 0.31697200  | 3.77460800  |
| C  | -2.27334100 | -1.69598700 | -2.23639200 |
| C  | -1.71789800 | -2.76653800 | -1.47394500 |
| C  | -2.14212000 | 1.02434300  | 4.11727900  |
| C  | -2.83423500 | 0.96578300  | 1.78201400  |
| C  | -3.05518900 | 1.34158900  | 3.14766400  |
| C  | -3.38412400 | -1.13151300 | -1.48572900 |
| C  | -4.30256600 | -0.04823400 | -1.95203400 |
| C  | -2.47844100 | -2.89688000 | -0.24515000 |
| C  | -2.26662300 | -3.94028800 | 0.80468100  |
| C  | -3.51266700 | -1.89835700 | -0.27605300 |
| C  | -4.54250100 | -1.68619900 | 0.78611500  |
| Ir | -1.54816000 | -0.89683900 | -0.32808200 |
| N  | 1.54892500  | -0.93727400 | 2.45497600  |
| N  | 0.31592600  | -1.09523100 | 0.62855200  |
| N  | -1.78449300 | 0.13803700  | 1.51361100  |
| O  | -3.56757200 | 1.39653200  | 0.83931800  |
| H  | 4.33134800  | -1.65153600 | 2.37677400  |
| H  | 1.57791000  | -1.92043300 | -1.81286700 |
| H  | 1.81331800  | -0.68767000 | 3.39585900  |
| H  | -2.23241500 | -1.97994300 | -4.34981000 |

|   |             |             |             |
|---|-------------|-------------|-------------|
| H | -0.09217600 | -3.30425400 | -2.77233600 |
| H | -0.75806600 | -1.24035900 | -3.69802900 |
| H | 0.10650800  | -3.85388600 | -1.09824000 |
| H | -2.24474100 | -0.28863900 | -3.84880500 |
| H | -0.20231800 | 0.10938900  | 4.50920000  |
| H | -1.04863100 | -4.66028000 | -2.16877300 |
| H | -3.76196900 | 0.70228000  | -2.53192300 |
| H | -2.30160400 | 1.34153000  | 5.14271600  |
| H | -2.59853300 | -3.58751100 | 1.78319800  |
| H | -3.94319100 | 1.92556000  | 3.35749900  |
| H | -5.09696500 | -0.47031500 | -2.57584700 |
| H | -2.87473600 | 1.93091400  | -0.25796900 |
| H | -4.75128700 | 0.46550700  | -1.10056800 |
| H | -1.21054900 | -4.20998200 | 0.87944200  |
| H | -2.83039400 | -4.84759100 | 0.56348400  |
| H | -5.38805600 | -2.35827400 | 0.60776100  |
| H | -4.90363400 | -0.65721900 | 0.78012800  |
| H | -4.13837100 | -1.90619800 | 1.77716000  |
| C | -1.07528100 | 2.03115800  | -1.09406300 |
| H | -0.95359200 | 0.53142100  | -0.96491900 |
| H | 3.98298900  | -2.49530800 | -1.83508400 |
| C | 5.80840200  | -2.49486500 | 0.15643500  |
| C | 6.53217100  | -2.36636800 | 1.50001100  |
| H | 7.58418400  | -2.63473500 | 1.37333300  |
| H | 6.49809700  | -1.34097900 | 1.88230600  |
| H | 6.10854400  | -3.03781000 | 2.25368000  |
| C | 5.93932100  | -3.94871700 | -0.32912700 |
| H | 5.48144300  | -4.09395200 | -1.31159700 |
| H | 6.99648700  | -4.21841900 | -0.41165300 |
| H | 5.46374600  | -4.63927600 | 0.37355500  |
| C | 6.48622400  | -1.55217100 | -0.85298800 |
| H | 7.54904700  | -1.79848500 | -0.93577600 |
| H | 6.04629700  | -1.63899000 | -1.85032400 |
| H | 6.39987300  | -0.50973900 | -0.53195800 |
| O | -2.35956500 | 2.26833800  | -1.12485800 |
| C | -0.28713400 | 2.37882200  | 0.12451300  |
| C | -0.84962100 | 3.20848900  | 1.09426400  |
| C | 1.02383600  | 1.91465600  | 0.27447400  |
| C | -0.09456500 | 3.58622500  | 2.20297600  |
| H | -1.86461700 | 3.57386900  | 0.96732000  |
| C | 1.77803000  | 2.30414200  | 1.37130400  |
| H | 1.44944100  | 1.26194900  | -0.48422700 |
| C | 1.21712000  | 3.14118100  | 2.33959500  |
| H | -0.53017900 | 4.23854500  | 2.95262400  |
| H | 2.80431800  | 1.96265900  | 1.46667700  |
| H | 1.80794600  | 3.45301200  | 3.19508100  |
| C | 1.48182300  | 3.68681400  | -2.11554700 |
| C | 0.92871300  | 4.71885000  | -1.35041300 |
| C | 2.87224400  | 3.54584100  | -2.16926200 |
| C | 1.74975700  | 5.55632200  | -0.60485000 |
| H | -0.14831400 | 4.85944500  | -1.34512400 |
| C | 3.69287200  | 4.37971900  | -1.41758400 |
| H | 3.30794600  | 2.76402900  | -2.78584500 |
| C | 3.13206800  | 5.38020000  | -0.62709900 |

|   |             |            |             |
|---|-------------|------------|-------------|
| H | 1.31070500  | 6.35081800 | -0.01033000 |
| H | 4.77001100  | 4.25415400 | -1.45437800 |
| H | 3.77183300  | 6.03413700 | -0.04364500 |
| C | 0.63298800  | 2.74016100 | -2.86399100 |
| H | 0.92012100  | 2.57682700 | -3.90253000 |
| C | -0.45117500 | 2.06778600 | -2.44557100 |
| H | -1.00794300 | 1.48343800 | -3.17258900 |

I7

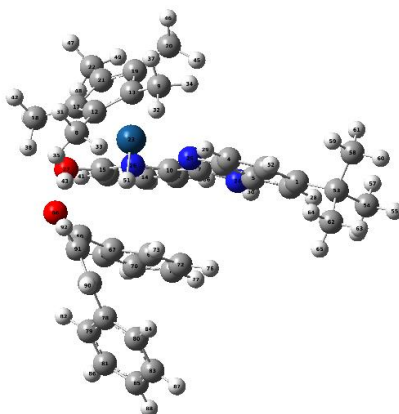

| I7                                      |              |
|-----------------------------------------|--------------|
| SCF Done: E (RM062X)                    | -2007.168149 |
| Thermal correction to Gibbs Free Energy | 0.694150     |

|    |             |             |             |
|----|-------------|-------------|-------------|
| C  | 4.99582900  | -0.65305000 | 0.08177400  |
| C  | 4.22050700  | -0.98838400 | -1.06127700 |
| C  | 4.35638700  | -0.45490600 | 1.29847500  |
| C  | 2.85001400  | -1.14452300 | -1.02541100 |
| C  | 2.96865700  | -0.60966100 | 1.33636800  |
| C  | 2.21393500  | -0.96466400 | 0.20725600  |
| C  | 0.82038600  | -0.70096200 | 1.84340400  |
| C  | -1.84559600 | -1.43651900 | -3.51537900 |
| C  | 0.59242400  | -3.34156500 | -2.61529100 |
| C  | -0.47798800 | -0.54493100 | 2.48175100  |
| C  | -0.67244800 | -0.37741100 | 3.83876900  |
| C  | -1.74208900 | -2.21927400 | -2.24494100 |
| C  | -0.63125800 | -3.02412400 | -1.81443400 |
| C  | -1.98464800 | -0.21810800 | 4.29666900  |
| C  | -2.72653100 | -0.30351900 | 2.01244100  |
| C  | -3.01543800 | -0.16890800 | 3.38393700  |
| C  | -2.76738800 | -2.32478700 | -1.24936300 |
| C  | -4.15717500 | -1.77987900 | -1.38285400 |
| C  | -1.04342700 | -3.75783100 | -0.61419000 |
| C  | -0.17892700 | -4.75016500 | 0.09877800  |
| C  | -2.33059700 | -3.32482800 | -0.27044800 |
| C  | -3.14947900 | -3.73302400 | 0.91298600  |
| Ir | -0.96507100 | -1.43068900 | -0.39005800 |

|   |             |             |             |
|---|-------------|-------------|-------------|
| N | 2.04983000  | -0.45515000 | 2.36076000  |
| N | 0.88250900  | -1.02987300 | 0.56988500  |
| N | -1.48922700 | -0.56530900 | 1.57677100  |
| O | -3.71889400 | -0.17463100 | 1.14994700  |
| H | 4.90487800  | -0.18639000 | 2.19315500  |
| H | 2.27551600  | -1.37749500 | -1.91352500 |
| H | 2.24570100  | -0.13213300 | 3.29572600  |
| H | -2.24006800 | -2.07320300 | -4.31404100 |
| H | 0.84569100  | -2.52504100 | -3.29535100 |
| H | -0.87289800 | -1.05221700 | -3.82827300 |
| H | 1.45227800  | -3.53940400 | -1.97083100 |
| H | -2.52534000 | -0.59175400 | -3.38497300 |
| H | 0.16515700  | -0.39358200 | 4.52636300  |
| H | 0.41479700  | -4.23760900 | -3.21980300 |
| H | -4.14479500 | -0.75177300 | -1.75164800 |
| H | -2.18550000 | -0.10904700 | 5.35698000  |
| H | -0.56735000 | -4.97718400 | 1.09311600  |
| H | -4.04566900 | 0.00116800  | 3.67111700  |
| H | -4.72675500 | -2.39342500 | -2.08889700 |
| H | -3.41586300 | 0.23561200  | 0.29594000  |
| H | -4.68185600 | -1.78845400 | -0.42689300 |
| H | 0.84221400  | -4.37391400 | 0.20923100  |
| H | -0.12777700 | -5.68778800 | -0.46431900 |
| H | -3.90190800 | -4.47057700 | 0.61512900  |
| H | -3.68096500 | -2.87197900 | 1.32702800  |
| H | -2.53429600 | -4.17337600 | 1.69969400  |
| C | -2.15985200 | 2.05688600  | -1.07758900 |
| H | -0.72962200 | -0.03188400 | -1.02845200 |
| H | 4.72877100  | -1.12284800 | -2.01036900 |
| C | 6.51217100  | -0.51579100 | -0.07322200 |
| C | 7.19278100  | -0.13482200 | 1.24486300  |
| H | 8.27040600  | -0.04536200 | 1.08483900  |
| H | 6.83429400  | 0.82853100  | 1.62192000  |
| H | 7.03614700  | -0.89550400 | 2.01641000  |
| C | 7.09245500  | -1.85842600 | -0.54988800 |
| H | 6.67490900  | -2.16408100 | -1.51330900 |
| H | 8.17698400  | -1.77379400 | -0.66797000 |
| H | 6.88727600  | -2.65052900 | 0.17627800  |
| C | 6.81923900  | 0.57706000  | -1.11148900 |
| H | 7.90176100  | 0.68747300  | -1.22592300 |
| H | 6.40476600  | 0.33526000  | -2.09397600 |
| H | 6.40798900  | 1.54070300  | -0.79609400 |
| O | -3.16247900 | 1.34661900  | -0.99625500 |
| C | -1.37505700 | 2.37692000  | 0.15331000  |
| C | -2.06062700 | 2.59584600  | 1.34912400  |
| C | 0.02253600  | 2.38753300  | 0.13585200  |
| C | -1.35269700 | 2.83934300  | 2.52219700  |
| H | -3.14760900 | 2.57745500  | 1.34841600  |
| C | 0.72836100  | 2.61404600  | 1.31163100  |
| H | 0.54946000  | 2.20804500  | -0.79650800 |
| C | 0.04097600  | 2.84638000  | 2.50347000  |
| H | -1.88632600 | 3.02711800  | 3.44838600  |
| H | 1.81409800  | 2.61945900  | 1.29439000  |
| H | 0.59116700  | 3.04504000  | 3.41862100  |

|   |             |            |             |
|---|-------------|------------|-------------|
| C | -0.62559100 | 4.72086100 | -1.87114000 |
| C | -1.49196100 | 5.22934000 | -0.89604200 |
| C | 0.63945400  | 5.29994700 | -2.02801100 |
| C | -1.08087300 | 6.25913100 | -0.05939300 |
| H | -2.49680900 | 4.82578600 | -0.81148500 |
| C | 1.05390500  | 6.32352200 | -1.18406000 |
| H | 1.30463200  | 4.93060200 | -2.80388200 |
| C | 0.19663900  | 6.79958800 | -0.19424000 |
| H | -1.76136400 | 6.64933200 | 0.68998000  |
| H | 2.04061600  | 6.75800200 | -1.30504000 |
| H | 0.51569300  | 7.60677100 | 0.45682300  |
| C | -1.01319300 | 3.60042000 | -2.74081100 |
| H | -0.71259200 | 3.69556500 | -3.78396600 |
| C | -1.70575700 | 2.49388800 | -2.41440200 |
| H | -2.00849900 | 1.81399900 | -3.20604800 |

**I8**

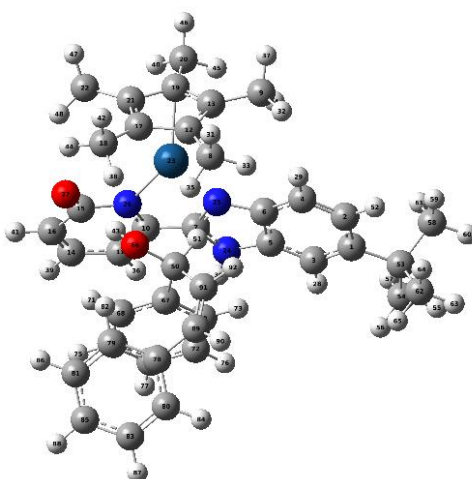

| <b>I8</b>                                      |                     |
|------------------------------------------------|---------------------|
| <b>SCF Done: E (RM062X)</b>                    | <b>-2007.147327</b> |
| <b>Thermal correction to Gibbs Free Energy</b> | <b>0.700076</b>     |

|   |             |             |             |
|---|-------------|-------------|-------------|
| C | 4.83230600  | 1.39829100  | 0.01460800  |
| C | 4.37807500  | 0.54397800  | -1.01915100 |
| C | 4.06455400  | 1.53753600  | 1.16056800  |
| C | 3.20590600  | -0.18342100 | -0.94193300 |
| C | 2.88020400  | 0.80917300  | 1.24518900  |
| C | 2.44565800  | -0.06115200 | 0.23156300  |
| C | 0.91322900  | -0.03856500 | 1.79920400  |
| C | -0.32876800 | -1.79382000 | -3.26054500 |
| C | 2.18501700  | -3.38139200 | -1.89509200 |
| C | -0.39369800 | -0.28621800 | 2.38202100  |
| C | -0.83053200 | 0.21278200  | 3.56910200  |
| C | -0.34185100 | -2.68926300 | -2.06844900 |
| C | 0.76332000  | -3.34097300 | -1.44631400 |
| C | -2.18368300 | -0.04471000 | 3.93369700  |



|    |             |             |             |
|----|-------------|-------------|-------------|
| C  | -2.52776300 | -1.15871000 | 1.77238800  |
| C  | -3.00233200 | -0.70511800 | 3.07435000  |
| C  | -1.56693000 | -3.07590000 | -1.37566000 |
| C  | -2.94877800 | -2.76055400 | -1.85158400 |
| C  | 0.25536400  | -4.02749800 | -0.28484600 |
| C  | 1.06965700  | -4.82792400 | 0.67476000  |
| C  | -1.19219200 | -3.89901700 | -0.27466000 |
| C  | -2.11461100 | -4.53045100 | 0.71339900  |
| Ir | -0.20817600 | -1.98011100 | -0.02413800 |
| N  | 1.89408900  | 0.77517600  | 2.22329000  |
| N  | 1.21637700  | -0.59661700 | 0.62625700  |
| N  | -1.16594100 | -1.03498100 | 1.53345200  |
| O  | -3.27402600 | -1.60933000 | 0.88869200  |
| H  | 4.36416200  | 2.19441700  | 1.96925300  |
| H  | 2.87407400  | -0.80191600 | -1.76622900 |
| H  | 1.82189500  | 1.39609500  | 3.01578600  |
| H  | -0.57188200 | -2.37153500 | -4.16092400 |
| H  | 2.34608700  | -2.71897700 | -2.74614000 |
| H  | 0.65245100  | -1.33077700 | -3.40109700 |
| H  | 2.87378100  | -3.10283000 | -1.09648200 |
| H  | -1.08340100 | -1.00825700 | -3.14466300 |
| H  | -0.18306000 | 0.80013300  | 4.20986500  |
| H  | 2.43178400  | -4.39931800 | -2.21475900 |
| H  | -3.00854600 | -1.75063300 | -2.23957100 |
| H  | -2.55928700 | 0.31558300  | 4.88684000  |
| H  | 0.60378300  | -4.86055600 | 1.66128600  |
| H  | -4.04789900 | -0.88755200 | 3.29365600  |
| H  | -3.19081900 | -3.45859900 | -2.65817400 |
| H  | -2.57462900 | -0.25098200 | -0.59275600 |
| H  | -3.68516900 | -2.86756500 | -1.04597500 |
| H  | 2.07362100  | -4.41336700 | 0.77761700  |
| H  | 1.15490500  | -5.85567200 | 0.30447700  |
| H  | -2.39460500 | -5.53291600 | 0.37154500  |
| H  | -3.01644400 | -3.92401400 | 0.82807600  |
| H  | -1.63439400 | -4.62541400 | 1.68757900  |
| C  | -1.24227800 | 1.08711600  | -1.26129100 |
| H  | -0.36158300 | 0.41891100  | -1.17328000 |
| H  | 4.97490300  | 0.46144900  | -1.92113000 |
| C  | 6.15127500  | 2.14969400  | -0.17578500 |
| C  | 6.48595900  | 3.02245500  | 1.03234200  |
| H  | 7.43500200  | 3.53462500  | 0.85539800  |
| H  | 5.72156500  | 3.78899400  | 1.19778900  |
| H  | 6.59612300  | 2.42768100  | 1.94575600  |
| C  | 7.28637600  | 1.13092200  | -0.37212700 |
| H  | 7.12421500  | 0.51203200  | -1.26014400 |
| H  | 8.23862200  | 1.65372600  | -0.50011100 |
| H  | 7.37507500  | 0.46861300  | 0.49420500  |
| C  | 6.05115500  | 3.05678500  | -1.41643100 |
| H  | 6.98931300  | 3.60393800  | -1.55216000 |
| H  | 5.86780600  | 2.48465800  | -2.32957000 |
| H  | 5.24304500  | 3.78573500  | -1.30656700 |
| O  | -2.40344900 | 0.27849700  | -1.40310700 |
| C  | -1.22063600 | 1.95747600  | -0.01639600 |
| C  | -2.32386800 | 2.06160100  | 0.83048100  |

|   |             |            |             |
|---|-------------|------------|-------------|
| C | -0.04566900 | 2.64637100 | 0.30631500  |
| C | -2.25880300 | 2.84806400 | 1.97873000  |
| H | -3.24851500 | 1.54420800 | 0.58051600  |
| C | 0.02171500  | 3.43206000 | 1.45244100  |
| H | 0.81674900  | 2.57217300 | -0.35552400 |
| C | -1.08708200 | 3.53427400 | 2.29489100  |
| H | -3.12926700 | 2.93169500 | 2.62001000  |
| H | 0.93336900  | 3.97984400 | 1.68007600  |
| H | -1.04469500 | 4.16151500 | 3.17936300  |
| C | -2.67030600 | 3.66705600 | -2.01041100 |
| C | -3.77159800 | 2.95000900 | -1.52405000 |
| C | -2.57662100 | 5.03832800 | -1.75800000 |
| C | -4.74347300 | 3.59376500 | -0.77684900 |
| H | -3.84345600 | 1.88674200 | -1.74522800 |
| C | -3.54171300 | 5.67671700 | -1.00351300 |
| H | -1.73674900 | 5.60506400 | -2.14797900 |
| C | -4.62664400 | 4.95721300 | -0.50925500 |
| H | -5.59730200 | 3.03342200 | -0.41147300 |
| H | -3.45477300 | 6.74195600 | -0.80370800 |
| H | -5.38761000 | 5.46897300 | 0.07195700  |
| C | -1.63340800 | 3.02289200 | -2.82473100 |
| H | -1.33996200 | 3.54257100 | -3.73868900 |
| C | -1.03062200 | 1.88134100 | -2.53172600 |
| H | -0.29606000 | 1.48900800 | -3.22924000 |

**TS<sub>3</sub>-CF<sub>3</sub>**

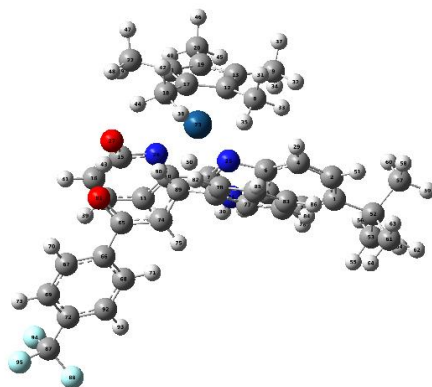

| <b>TS<sub>3</sub>-CF<sub>3</sub></b>           |                     |
|------------------------------------------------|---------------------|
| <b>SCF Done: E (RM062X)</b>                    | <b>-2344.075659</b> |
| <b>Thermal correction to Gibbs Free Energy</b> | <b>0.691664</b>     |

|   |             |            |             |
|---|-------------|------------|-------------|
| C | -3.76290300 | 3.89035800 | -0.37766900 |
| C | -4.11898500 | 2.72546600 | 0.35642500  |
| C | -2.64675300 | 3.85687400 | -1.20365300 |
| C | -3.41749200 | 1.54042900 | 0.27555600  |
| C | -1.92966600 | 2.66021900 | -1.27946400 |
| C | -2.30954100 | 1.50711300 | -0.57800100 |
| C | -0.48184300 | 1.02826700 | -1.65100900 |

|    |             |             |             |
|----|-------------|-------------|-------------|
| C  | -3.38808000 | -2.35376900 | 1.86008000  |
| C  | -4.48576000 | -1.37606000 | -1.03187900 |
| C  | 0.70308500  | 0.23787300  | -1.95795700 |
| C  | 1.85502900  | 0.72311300  | -2.54193100 |
| C  | -2.79356500 | -2.65238100 | 0.52023700  |
| C  | -3.29247000 | -2.23759800 | -0.76047100 |
| C  | 2.98260200  | -0.10970800 | -2.55581700 |
| C  | 1.71511900  | -1.77157500 | -1.34083900 |
| C  | 2.91962700  | -1.34280300 | -1.94723100 |
| C  | -1.66412200 | -3.54213700 | 0.27510300  |
| C  | -0.87042000 | -4.25101200 | 1.32380900  |
| C  | -2.47982300 | -2.82260900 | -1.79034200 |
| C  | -2.70420300 | -2.71149500 | -3.26397100 |
| C  | -1.47617600 | -3.63868700 | -1.13834300 |
| C  | -0.48711100 | -4.49480800 | -1.86189000 |
| Ir | -1.20230500 | -1.55907400 | -0.48486200 |
| N  | -0.76521400 | 2.31907700  | -1.95076000 |
| N  | -1.39265800 | 0.50793300  | -0.84639400 |
| N  | 0.60798300  | -1.01207200 | -1.43215100 |
| O  | 1.65397100  | -2.86345400 | -0.62211300 |
| H  | -2.32864300 | 4.72691900  | -1.76513200 |
| H  | -3.67908100 | 0.67117200  | 0.86928200  |
| H  | -0.22296000 | 2.92283700  | -2.55020600 |
| H  | -4.02036600 | -3.18617500 | 2.18598200  |
| H  | -4.92881400 | -0.99523500 | -0.11168200 |
| H  | -4.00536500 | -1.45354500 | 1.83169900  |
| H  | -4.23116600 | -0.52505700 | -1.66935900 |
| H  | -2.61264000 | -2.19459600 | 2.61271300  |
| H  | 1.89911600  | 1.73054100  | -2.93921800 |
| H  | -5.24557900 | -1.97073900 | -1.54838300 |
| H  | -0.90422000 | -3.70237700 | 2.26930600  |
| H  | 3.91017000  | 0.23560400  | -2.99972800 |
| H  | -1.76156300 | -2.77002200 | -3.81201000 |
| H  | 3.78219800  | -1.99404700 | -1.87194800 |
| H  | -1.28050900 | -5.25039100 | 1.49998100  |
| H  | 2.35891200  | -2.68846400 | 0.20879300  |
| H  | 0.17216900  | -4.34918200 | 1.01270700  |
| H  | -3.19175800 | -1.76799000 | -3.51878800 |
| H  | -3.34616400 | -3.52781000 | -3.61320100 |
| H  | -1.01519100 | -5.33908000 | -2.31716500 |
| H  | 0.28039500  | -4.87487600 | -1.19049300 |
| H  | 0.01203400  | -3.93856000 | -2.65950300 |
| H  | -0.20615700 | -1.18945800 | 0.84213700  |
| H  | -4.97856500 | 2.77207200  | 1.01717500  |
| C  | -4.61514200 | 5.15046700  | -0.21269900 |
| C  | -4.10001100 | 6.30868200  | -1.07179000 |
| H  | -4.74228000 | 7.18114200  | -0.92698300 |
| H  | -3.08229200 | 6.59932300  | -0.79206400 |
| H  | -4.11600400 | 6.06005500  | -2.13783000 |
| C  | -6.06275700 | 4.84038200  | -0.63134800 |
| H  | -6.50457500 | 4.04911300  | -0.01930600 |
| H  | -6.68150900 | 5.73514200  | -0.51475500 |
| H  | -6.10751200 | 4.52661200  | -1.67843000 |
| C  | -4.58710500 | 5.58879300  | 1.26202700  |

|   |             |             |             |
|---|-------------|-------------|-------------|
| H | -5.18958300 | 6.49288900  | 1.39118900  |
| H | -4.99539600 | 4.82071500  | 1.92469000  |
| H | -3.56508800 | 5.80941500  | 1.58418800  |
| C | 2.99178900  | -0.86538400 | 1.20168800  |
| C | 4.17510600  | 0.00258900  | 0.92527200  |
| C | 5.44446700  | -0.58301500 | 0.94568100  |
| C | 4.04763400  | 1.35534300  | 0.58872700  |
| C | 6.57278600  | 0.17367100  | 0.65618900  |
| H | 5.52500100  | -1.63493600 | 1.19609200  |
| H | 3.06727900  | 1.81730600  | 0.53374900  |
| C | 6.43152600  | 1.51890000  | 0.32638600  |
| H | 7.56109400  | -0.27180900 | 0.69052800  |
| C | 1.77186700  | -0.28336400 | 1.59988200  |
| H | 1.71240100  | 0.78701600  | 1.75613600  |
| C | -0.35303800 | -0.59962400 | 2.92152000  |
| C | -1.07710700 | 0.57131600  | 2.68147400  |
| C | -0.59583300 | -1.32667700 | 4.08876100  |
| C | -2.03541700 | 1.00568300  | 3.58806100  |
| H | -0.89971100 | 1.12589600  | 1.76289000  |
| C | -1.55147500 | -0.88512900 | 5.00437500  |
| H | -0.02756000 | -2.23164300 | 4.28831600  |
| C | -2.27573500 | 0.27610900  | 4.75325900  |
| H | -2.59724500 | 1.91204000  | 3.38281600  |
| H | -1.72956200 | -1.45184900 | 5.91226800  |
| H | -3.02299200 | 0.61491300  | 5.46300800  |
| C | 7.63758400  | 2.33215900  | -0.05695400 |
| F | 7.50495800  | 3.61024200  | 0.31958100  |
| C | 0.66565700  | -1.08483900 | 1.94459900  |
| H | 0.89012300  | -2.15153000 | 2.00632100  |
| O | 3.16913700  | -2.12499500 | 1.07895300  |
| C | 5.17218700  | 2.11219800  | 0.28854400  |
| H | 5.07987300  | 3.16216100  | 0.03150100  |
| F | 7.81426600  | 2.33064000  | -1.38769100 |
| F | 8.75521900  | 1.85003500  | 0.49490500  |

I5-CF3

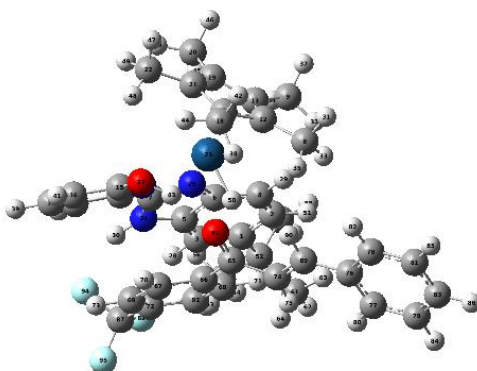

I5-CF3

|                                                |                     |
|------------------------------------------------|---------------------|
| <b>SCF Done: E (RM062X)</b>                    | <b>-2344.098134</b> |
| <b>Thermal correction to Gibbs Free Energy</b> | <b>0.701082</b>     |

|    |             |             |             |
|----|-------------|-------------|-------------|
| C  | 4.09229400  | 2.44657300  | -1.56869300 |
| C  | 2.83258600  | 2.47712700  | -2.22784200 |
| C  | 4.37215900  | 1.40839700  | -0.69033600 |
| C  | 1.86051100  | 1.51449500  | -2.04611200 |
| C  | 3.38943600  | 0.43308400  | -0.50460800 |
| C  | 2.15244500  | 0.46469100  | -1.16820900 |
| C  | 2.11482200  | -1.23180900 | 0.17479500  |
| C  | -3.16528300 | 0.20981800  | -2.25456500 |
| C  | -0.53309000 | -0.18105900 | -4.09452300 |
| C  | 1.49684700  | -2.26950600 | 0.98668600  |
| C  | 2.17348600  | -3.09233200 | 1.86458400  |
| C  | -2.27118300 | -0.98934000 | -2.30627000 |
| C  | -1.07416100 | -1.14538400 | -3.08605600 |
| C  | 1.41849700  | -3.96906000 | 2.65137300  |
| C  | -0.57073300 | -3.05283500 | 1.66249200  |
| C  | 0.04288900  | -3.94095800 | 2.56559200  |
| C  | -2.48020800 | -2.21207200 | -1.58274300 |
| C  | -3.70078600 | -2.53876900 | -0.77638400 |
| C  | -0.62750400 | -2.53527200 | -2.96116900 |
| C  | 0.55352500  | -3.10559500 | -3.68224300 |
| C  | -1.47467500 | -3.17251600 | -2.04326100 |
| C  | -1.37534400 | -4.57413700 | -1.52993800 |
| Ir | -0.59898500 | -1.29301900 | -0.97618600 |
| N  | 3.33931200  | -0.67053100 | 0.32709600  |
| N  | 1.39188100  | -0.60158900 | -0.72950100 |
| N  | 0.14619200  | -2.28242900 | 0.83781200  |
| O  | -1.89231500 | -2.99330600 | 1.63981200  |
| H  | 5.30927600  | 1.35225400  | -0.14991200 |
| H  | 0.89708500  | 1.57047700  | -2.53940300 |
| H  | 4.00370600  | -0.90245300 | 1.05251900  |
| H  | -3.98572100 | 0.09565200  | -2.97036600 |
| H  | -0.85873900 | 0.83978000  | -3.88395000 |
| H  | -2.61987200 | 1.12326600  | -2.49849800 |
| H  | 0.55935400  | -0.19954900 | -4.11925600 |
| H  | -3.58962900 | 0.32973800  | -1.25495800 |
| H  | 3.25348400  | -3.05814000 | 1.93641600  |
| H  | -0.89557700 | -0.44776300 | -5.09297200 |
| H  | -3.97888900 | -1.70538500 | -0.12584300 |
| H  | 1.90983400  | -4.64496600 | 3.34295300  |
| H  | 0.86932800  | -4.05382700 | -3.24400000 |
| H  | -0.59563200 | -4.55872300 | 3.18465500  |
| H  | -4.54192800 | -2.75089500 | -1.44481000 |
| H  | -2.20560600 | -2.07238100 | 1.45275900  |
| H  | -3.53875700 | -3.41544300 | -0.14768100 |
| H  | 1.40336900  | -2.41802700 | -3.65219800 |
| H  | 0.31041800  | -3.28666700 | -4.73441100 |
| H  | -2.09758100 | -5.21799100 | -2.04224100 |
| H  | -1.60553900 | -4.60653800 | -0.46144700 |

|   |             |             |             |
|---|-------------|-------------|-------------|
| H | -0.37853000 | -4.99101500 | -1.68413500 |
| H | -0.94756100 | -0.00333500 | -0.18854700 |
| H | 2.62098600  | 3.30172000  | -2.90080300 |
| C | 5.09260400  | 3.57181500  | -1.84179300 |
| C | 6.39327200  | 3.38703000  | -1.05514900 |
| H | 7.07624800  | 4.20898400  | -1.28471300 |
| H | 6.21803700  | 3.39548900  | 0.02547100  |
| H | 6.89833400  | 2.45329200  | -1.32219900 |
| C | 5.43055000  | 3.59433000  | -3.34244400 |
| H | 4.54457800  | 3.77543500  | -3.95740800 |
| H | 6.14864700  | 4.39362800  | -3.54920700 |
| H | 5.87438300  | 2.64502200  | -3.65646700 |
| C | 4.46547400  | 4.91626900  | -1.43472700 |
| H | 5.17426700  | 5.72877700  | -1.62087400 |
| H | 3.55607300  | 5.13190400  | -2.00253300 |
| H | 4.21179200  | 4.92115700  | -0.37026000 |
| C | -2.32851400 | 0.60054100  | 1.89357600  |
| C | -0.90010500 | 0.63976800  | 2.34520100  |
| C | -0.45221700 | -0.30574700 | 3.27265700  |
| C | 0.00038500  | 1.54389900  | 1.77847400  |
| C | 0.89031900  | -0.35062700 | 3.62454200  |
| H | -1.16452800 | -1.00379600 | 3.70359900  |
| H | -0.34147800 | 2.26109300  | 1.03851300  |
| C | 1.78784200  | 0.53035500  | 3.01806900  |
| H | 1.24867200  | -1.07893100 | 4.34617300  |
| C | -3.00011200 | 1.87390900  | 1.61783800  |
| H | -2.44810400 | 2.78847200  | 1.80496100  |
| C | -5.11140600 | 3.04081100  | 0.89601800  |
| C | -4.64702600 | 4.36006300  | 1.02025600  |
| C | -6.42850300 | 2.82488400  | 0.46757800  |
| C | -5.47994500 | 5.42747800  | 0.72289700  |
| H | -3.63222200 | 4.55206500  | 1.35395200  |
| C | -7.26331200 | 3.89520000  | 0.16940600  |
| H | -6.79593500 | 1.80665600  | 0.37344700  |
| C | -6.78944100 | 5.19784900  | 0.29665500  |
| H | -5.11295600 | 6.44314300  | 0.82450100  |
| H | -8.28115200 | 3.71426700  | -0.15873000 |
| H | -7.43806000 | 6.03648900  | 0.06611000  |
| C | 3.24378600  | 0.42723600  | 3.36915400  |
| F | 4.01201500  | 1.19327500  | 2.58080700  |
| C | -4.28036300 | 1.88081600  | 1.19628200  |
| H | -4.75329200 | 0.90602100  | 1.07193800  |
| O | -2.89554700 | -0.48456500 | 1.76267000  |
| C | 1.35259500  | 1.47937800  | 2.09771500  |
| H | 2.06302400  | 2.15212800  | 1.62788200  |
| F | 3.68948800  | -0.84821800 | 3.20531700  |
| F | 3.49015700  | 0.75309900  | 4.63408600  |

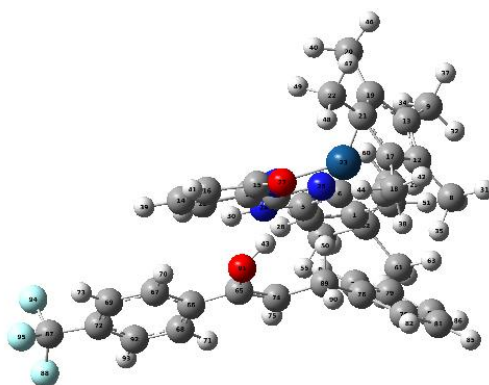

| <b>I<sub>6</sub>-CF<sub>3</sub></b>            |                     |
|------------------------------------------------|---------------------|
| <b>SCF Done: E (RM062X)</b>                    | <b>-2344.116357</b> |
| <b>Thermal correction to Gibbs Free Energy</b> | <b>0.695151</b>     |

|    |             |             |             |
|----|-------------|-------------|-------------|
| C  | -3.89979100 | 3.98528900  | -0.20320200 |
| C  | -4.45332300 | 2.73411100  | 0.17313300  |
| C  | -2.60247400 | 4.02619100  | -0.69998500 |
| C  | -3.77326600 | 1.53783600  | 0.04595300  |
| C  | -1.91509300 | 2.81835200  | -0.82094900 |
| C  | -2.48254200 | 1.58280700  | -0.48438200 |
| C  | -0.43040800 | 1.20385800  | -1.12823300 |
| C  | -3.42719100 | -2.34577700 | 1.74575200  |
| C  | -4.71758900 | -1.52673800 | -1.13009400 |
| C  | 0.76987700  | 0.41074900  | -1.34309100 |
| C  | 1.96893900  | 0.91260200  | -1.75468500 |
| C  | -2.89514200 | -2.65752800 | 0.38853300  |
| C  | -3.44475600 | -2.26586500 | -0.86119400 |
| C  | 3.04986700  | 0.00073600  | -1.91642700 |
| C  | 1.61641600  | -1.79844300 | -1.05769600 |
| C  | 2.87229800  | -1.30841100 | -1.60538700 |
| C  | -1.71352500 | -3.49052400 | 0.13024300  |
| C  | -0.90558900 | -4.18001800 | 1.17608300  |
| C  | -2.56054300 | -2.76280400 | -1.89283800 |
| C  | -2.75626500 | -2.57989900 | -3.35941800 |
| C  | -1.53599600 | -3.58498600 | -1.27493700 |
| C  | -0.54237100 | -4.40489700 | -2.03004000 |
| Ir | -1.39899700 | -1.48396700 | -0.66936600 |
| N  | -0.61577500 | 2.53418400  | -1.22526200 |
| N  | -1.53465300 | 0.59374300  | -0.70790700 |
| N  | 0.54939500  | -0.91385700 | -1.04530000 |
| O  | 1.49360800  | -2.94398700 | -0.59914000 |
| H  | -2.12874700 | 4.95978800  | -0.97838500 |
| H  | -4.20505000 | 0.60082300  | 0.37464100  |
| H  | 0.07968800  | 3.20612000  | -1.51551300 |
| H  | -4.03501800 | -3.18407800 | 2.10315500  |
| H  | -5.21923400 | -1.24905800 | -0.20228800 |
| H  | -4.04727400 | -1.44752900 | 1.73712700  |
| H  | -4.55198500 | -0.62361300 | -1.72324400 |

|   |             |             |             |
|---|-------------|-------------|-------------|
| H | -2.61450000 | -2.18307400 | 2.45738700  |
| H | 2.09638100  | 1.96777700  | -1.96666200 |
| H | -5.39562900 | -2.17884800 | -1.68930100 |
| H | -0.89673100 | -3.60492300 | 2.10538800  |
| H | 4.01420100  | 0.36140000  | -2.25986200 |
| H | -1.80297300 | -2.61002400 | -3.88984300 |
| H | 3.67663800  | -2.03146200 | -1.67155200 |
| H | -1.35240000 | -5.15828000 | 1.38418300  |
| H | 2.92141200  | -2.82721900 | 0.81953600  |
| H | 0.12019600  | -4.31768300 | 0.83208400  |
| H | -3.25105600 | -1.63121700 | -3.57665300 |
| H | -3.38546600 | -3.39042100 | -3.74401100 |
| H | -1.06985200 | -5.22908200 | -2.52165800 |
| H | 0.22482100  | -4.80396600 | -1.37106100 |
| H | -0.04014100 | -3.81191600 | -2.79789800 |
| H | 0.91681900  | -2.24027700 | 1.47943500  |
| H | -5.45589200 | 2.71434800  | 0.58790100  |
| C | -4.74568600 | 5.24849300  | -0.03059600 |
| C | -4.00559700 | 6.50359400  | -0.50144800 |
| H | -4.65117800 | 7.37559000  | -0.36932800 |
| H | -3.09354000 | 6.67946500  | 0.07800500  |
| H | -3.74375000 | 6.44490400  | -1.56286900 |
| C | -6.03673400 | 5.10745400  | -0.85534300 |
| H | -6.63883700 | 4.25445100  | -0.53005000 |
| H | -6.64819000 | 6.00759600  | -0.74277400 |
| H | -5.80975100 | 4.97864300  | -1.91780200 |
| C | -5.09994200 | 5.41915500  | 1.45672300  |
| H | -5.70673300 | 6.31938300  | 1.59238500  |
| H | -5.67441700 | 4.57050600  | 1.83856900  |
| H | -4.19588900 | 5.52032000  | 2.06454000  |
| C | 3.45939000  | -1.06944300 | 1.40916300  |
| C | 4.55797800  | -0.14884900 | 1.02672700  |
| C | 5.66821000  | -0.66093500 | 0.34592400  |
| C | 4.49796500  | 1.22907900  | 1.27454900  |
| C | 6.67867800  | 0.18239500  | -0.10275400 |
| H | 5.72992700  | -1.72831800 | 0.17182100  |
| H | 3.66768800  | 1.65303400  | 1.82856200  |
| C | 6.58787100  | 1.55074000  | 0.12539400  |
| H | 7.54045400  | -0.22096200 | -0.62393200 |
| C | 2.30291700  | -0.69270900 | 1.97759100  |
| H | 2.13463000  | 0.35403500  | 2.20092400  |
| C | 0.01226300  | -1.06407300 | 2.99959100  |
| C | -0.59429100 | 0.05667200  | 2.42093000  |
| C | -0.56267100 | -1.60603000 | 4.15170700  |
| C | -1.74454600 | 0.61842300  | 2.97076200  |
| H | -0.13637700 | 0.50692600  | 1.54339700  |
| C | -1.71070000 | -1.04451800 | 4.71157100  |
| H | -0.09442000 | -2.46409300 | 4.62715100  |
| C | -2.30610900 | 0.06788300  | 4.12198000  |
| H | -2.19085500 | 1.49683100  | 2.51270900  |
| H | -2.13135600 | -1.47070100 | 5.61669900  |
| H | -3.19210800 | 0.51124300  | 4.56442000  |
| C | 7.62843200  | 2.47964200  | -0.43004900 |
| F | 7.80400900  | 3.55147800  | 0.35311000  |



|   |            |             |             |
|---|------------|-------------|-------------|
| C | 1.23894000 | -1.68251400 | 2.37223600  |
| H | 1.66284500 | -2.43250200 | 3.05371600  |
| O | 3.73111700 | -2.37015600 | 1.10320900  |
| C | 5.50108800 | 2.07388100  | 0.82337400  |
| H | 5.45330200 | 3.13938300  | 1.02222900  |
| F | 7.26861700 | 2.93655700  | -1.64279900 |
| F | 8.81166000 | 1.87272700  | -0.57413300 |

TS3-OMe

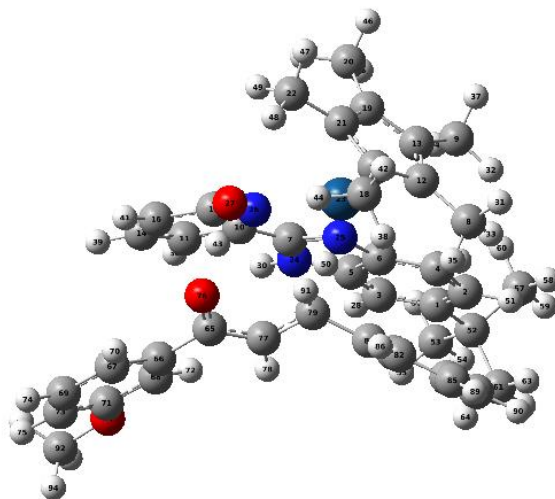

| TS3-OMe                                 |                     |
|-----------------------------------------|---------------------|
| SCF Done: E (RM062X)                    | <b>-2121.594618</b> |
| Thermal correction to Gibbs Free Energy | <b>0.720483</b>     |

|   |             |             |             |
|---|-------------|-------------|-------------|
| C | -4.20190500 | 3.03533200  | -0.32051800 |
| C | -4.28117800 | 1.79824900  | 0.37602200  |
| C | -3.10503200 | 3.28729500  | -1.13428000 |
| C | -3.32164100 | 0.81251700  | 0.27072900  |
| C | -2.12851300 | 2.29316400  | -1.23629400 |
| C | -2.23357200 | 1.06362900  | -0.57082800 |
| C | -0.33844900 | 1.05378700  | -1.63326300 |
| C | -2.38481700 | -2.92809800 | 1.82422400  |
| C | -3.66671500 | -2.26511500 | -1.08149900 |
| C | 0.99968700  | 0.56942500  | -1.94469800 |
| C | 2.00753500  | 1.32713100  | -2.50334200 |
| C | -1.72744800 | -3.08537500 | 0.48920200  |
| C | -2.30200500 | -2.81174900 | -0.79834900 |
| C | 3.29975600  | 0.78429700  | -2.52221700 |
| C | 2.45344100  | -1.15724000 | -1.35358800 |
| C | 3.52545100  | -0.44238700 | -1.94159900 |
| C | -0.41782400 | -3.68312500 | 0.25685000  |
| C | 0.51771000  | -4.17226600 | 1.31389200  |
| C | -1.36546900 | -3.19170700 | -1.81856200 |

|    |             |             |             |
|----|-------------|-------------|-------------|
| C  | -1.59742300 | -3.14466400 | -3.29441100 |
| C  | -0.20158100 | -3.74188000 | -1.15398700 |
| C  | 0.96680900  | -4.34995500 | -1.86083200 |
| Ir | -0.43434000 | -1.65105200 | -0.51645900 |
| N  | -0.91307200 | 2.25086700  | -1.90287400 |
| N  | -1.10868100 | 0.31279400  | -0.85496600 |
| N  | 1.19663600  | -0.68072800 | -1.44700100 |
| O  | 2.65317400  | -2.23709900 | -0.64719100 |
| H  | -2.99478800 | 4.22489100  | -1.66537300 |
| H  | -3.37293000 | -0.11083100 | 0.83797300  |
| H  | -0.51443000 | 2.98716100  | -2.46558500 |
| H  | -2.80192000 | -3.88495700 | 2.15489700  |
| H  | -4.20369200 | -2.02415500 | -0.16410300 |
| H  | -3.19931200 | -2.20177500 | 1.78427600  |
| H  | -3.62470800 | -1.36580600 | -1.70180600 |
| H  | -1.67476600 | -2.58224500 | 2.57935800  |
| H  | 1.81672900  | 2.32869900  | -2.87100500 |
| H  | -4.24828000 | -3.01993500 | -1.61991500 |
| H  | 0.33459400  | -3.65371400 | 2.25898800  |
| H  | 4.12307200  | 1.35032900  | -2.94434400 |
| H  | -0.66053500 | -2.99413000 | -3.83464000 |
| H  | 4.51807900  | -0.86865200 | -1.85986300 |
| H  | 0.37357700  | -5.24390500 | 1.48347500  |
| H  | 3.30956800  | -1.89884100 | 0.19697600  |
| H  | 1.55471100  | -4.00074100 | 1.01484900  |
| H  | -2.28050300 | -2.33540300 | -3.56069600 |
| H  | -2.03728100 | -4.08625700 | -3.64126400 |
| H  | 0.66797300  | -5.32230300 | -2.26632200 |
| H  | 1.81356800  | -4.48571100 | -1.19091500 |
| H  | 1.29640500  | -3.72314100 | -2.69305200 |
| H  | 0.45832400  | -1.05293400 | 0.80851800  |
| H  | -5.13124200 | 1.62349200  | 1.02753800  |
| C  | -5.32455800 | 4.05755100  | -0.12990600 |
| C  | -5.08747900 | 5.33122400  | -0.94623000 |
| H  | -5.91501700 | 6.02636500  | -0.78320800 |
| H  | -4.16624900 | 5.84022600  | -0.64498300 |
| H  | -5.03981200 | 5.12093000  | -2.01953800 |
| C  | -6.65704700 | 3.43312800  | -0.57879000 |
| H  | -6.90694300 | 2.54190000  | 0.00345200  |
| H  | -7.46826900 | 4.15522700  | -0.44638700 |
| H  | -6.61967800 | 3.15011700  | -1.63494000 |
| C  | -5.41074800 | 4.44185500  | 1.35759600  |
| H  | -6.20629100 | 5.17820400  | 1.50516900  |
| H  | -5.63633900 | 3.57852100  | 1.98980000  |
| H  | -4.46967100 | 4.88046000  | 1.70255600  |
| C  | 3.48928500  | 0.00017500  | 1.17978700  |
| C  | 4.43301400  | 1.12221800  | 0.91433800  |
| C  | 5.80879400  | 0.88151100  | 1.01742300  |
| C  | 3.97545900  | 2.37288100  | 0.50548700  |
| C  | 6.70115700  | 1.90649500  | 0.74324700  |
| H  | 6.14824900  | -0.10254400 | 1.31822000  |
| C  | 4.88130500  | 3.39493700  | 0.21135400  |
| H  | 2.91860500  | 2.58114100  | 0.37454600  |
| C  | 6.25263800  | 3.16562700  | 0.33997200  |

|   |             |             |             |
|---|-------------|-------------|-------------|
| H | 7.76817200  | 1.73430800  | 0.83943100  |
| H | 6.97211700  | 3.94716600  | 0.12808800  |
| O | 3.95724300  | -1.18568800 | 1.05416200  |
| C | 2.16476400  | 0.27598400  | 1.57560600  |
| H | 1.85818800  | 1.30299400  | 1.73579600  |
| C | 1.27992300  | -0.76882200 | 1.90629900  |
| C | 0.18500500  | -0.56974300 | 2.90165200  |
| C | -0.82434100 | 0.37498000  | 2.69723100  |
| C | 0.16248200  | -1.35565000 | 4.05611400  |
| C | -1.84738700 | 0.52326900  | 3.62594200  |
| H | -0.81390200 | 0.97666800  | 1.79135600  |
| C | -0.85885900 | -1.20030000 | 4.99302000  |
| H | 0.95221800  | -2.08272100 | 4.22672300  |
| C | -1.86799000 | -0.26721300 | 4.77618600  |
| H | -2.63043700 | 1.25495000  | 3.45060600  |
| H | -0.86480600 | -1.81159500 | 5.88928400  |
| H | -2.66590700 | -0.15161300 | 5.50197100  |
| H | 1.75454900  | -1.75122500 | 1.95004300  |
| C | 5.20562200  | 5.65261600  | -0.42796100 |
| H | 4.57681600  | 6.49734900  | -0.70608900 |
| H | 5.77013300  | 5.90279700  | 0.47725100  |
| H | 5.90685900  | 5.43851100  | -1.24315700 |
| O | 4.33058900  | 4.56519800  | -0.20182500 |

### I5-OMe

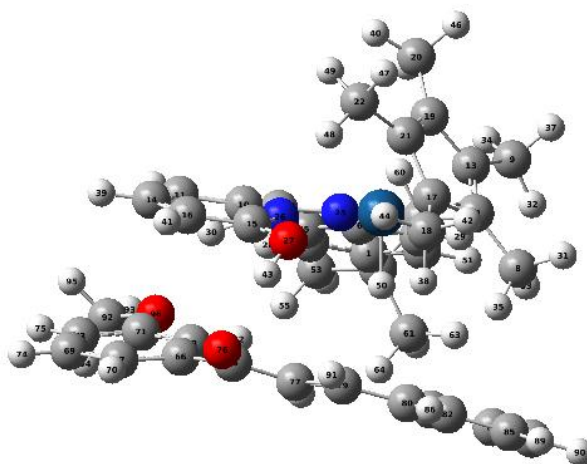

| I5-OMe                                  |              |
|-----------------------------------------|--------------|
| SCF Done: E (RM062X)                    | -2121.618148 |
| Thermal correction to Gibbs Free Energy | 0.732104     |

|   |             |             |             |
|---|-------------|-------------|-------------|
| C | -4.86614800 | -1.56799800 | 0.34764800  |
| C | -3.83087900 | -2.53163600 | 0.48709800  |
| C | -4.56217700 | -0.32315100 | -0.18573900 |
| C | -2.52630800 | -2.30007300 | 0.10253200  |

|    |             |             |             |
|----|-------------|-------------|-------------|
| C  | -3.24176000 | -0.08472300 | -0.57318300 |
| C  | -2.23107200 | -1.05177500 | -0.45497600 |
| C  | -1.31642200 | 0.73928000  | -1.24908000 |
| C  | 2.37767400  | -3.40067200 | 0.93240800  |
| C  | 0.12903800  | -4.18933400 | -1.22876700 |
| C  | -0.23381500 | 1.64907100  | -1.58682000 |
| C  | -0.41167500 | 2.92366200  | -2.09440700 |
| C  | 2.18487900  | -2.78925700 | -0.41833500 |
| C  | 1.15660100  | -3.11036400 | -1.36534700 |
| C  | 0.71004500  | 3.74500600  | -2.20646100 |
| C  | 2.03215300  | 1.95820300  | -1.29192800 |
| C  | 1.93678900  | 3.26686100  | -1.78936700 |
| C  | 3.03744500  | -1.79942600 | -1.02114400 |
| C  | 4.32325300  | -1.30611600 | -0.43248900 |
| C  | 1.45098400  | -2.41974000 | -2.61753300 |
| C  | 0.64428800  | -2.55947100 | -3.87043100 |
| C  | 2.58728400  | -1.62081700 | -2.40026700 |
| C  | 3.23126900  | -0.69548300 | -3.38424500 |
| Ir | 1.02086800  | -1.00585200 | -0.81562000 |
| N  | -2.62929700 | 1.04261800  | -1.09489700 |
| N  | -1.04189200 | -0.49992200 | -0.89538600 |
| N  | 0.97505900  | 1.14732800  | -1.22940500 |
| O  | 3.19073200  | 1.46434600  | -0.83656300 |
| H  | -5.31494400 | 0.44694300  | -0.30196100 |
| H  | -1.74799300 | -3.03928000 | 0.24311500  |
| H  | -2.97651200 | 1.99115500  | -0.99710000 |
| H  | 2.97867000  | -4.31228100 | 0.84573400  |
| H  | -0.05609600 | -4.43344100 | -0.18069600 |
| H  | 1.42229600  | -3.65822900 | 1.39431200  |
| H  | -0.81705100 | -3.90666500 | -1.69713100 |
| H  | 2.89387400  | -2.70946000 | 1.60187800  |
| H  | -1.40023900 | 3.27039200  | -2.37355400 |
| H  | 0.48783400  | -5.09862600 | -1.72302900 |
| H  | 4.18595100  | -1.03090900 | 0.61671700  |
| H  | 0.61753500  | 4.75413900  | -2.59233700 |
| H  | 0.87583400  | -1.76716300 | -4.58454300 |
| H  | 2.82864100  | 3.88172800  | -1.80901200 |
| H  | 5.08548200  | -2.09078000 | -0.48587300 |
| H  | 3.59837600  | 2.14250100  | -0.26314900 |
| H  | 4.69084500  | -0.43083600 | -0.96700400 |
| H  | -0.42703900 | -2.51937600 | -3.65473700 |
| H  | 0.84965600  | -3.51893500 | -4.35692600 |
| H  | 4.04059100  | -1.21198700 | -3.91043700 |
| H  | 3.66224000  | 0.17026600  | -2.87701000 |
| H  | 2.51553400  | -0.34211000 | -4.12956700 |
| H  | 0.84744100  | -0.69480500 | 0.70836500  |
| H  | -4.07548400 | -3.49458900 | 0.92343000  |
| C  | -6.28018600 | -1.93892300 | 0.80011900  |
| C  | -7.27476200 | -0.79551900 | 0.57777300  |
| H  | -8.26807500 | -1.10882200 | 0.90966300  |
| H  | -7.00129400 | 0.09582100  | 1.15180600  |
| H  | -7.34924000 | -0.52441100 | -0.48030600 |
| C  | -6.76036400 | -3.16216500 | 0.00008300  |
| H  | -6.11532500 | -4.03069100 | 0.15917600  |

|   |             |             |             |
|---|-------------|-------------|-------------|
| H | -7.77260500 | -3.43718700 | 0.31157200  |
| H | -6.77812500 | -2.94406600 | -1.07177900 |
| C | -6.26082300 | -2.27988700 | 2.30030800  |
| H | -7.26840200 | -2.54639000 | 2.63374800  |
| H | -5.60384100 | -3.12626500 | 2.51826300  |
| H | -5.91963800 | -1.42389100 | 2.89014200  |
| C | 1.80700500  | 2.98875800  | 1.52687300  |
| C | 0.62816800  | 3.86100100  | 1.21654500  |
| C | 0.86987500  | 5.21768300  | 0.96436300  |
| C | -0.65800000 | 3.34309500  | 1.07434600  |
| C | -0.17855700 | 6.04402300  | 0.59519700  |
| H | 1.88037600  | 5.59639300  | 1.06858800  |
| C | -1.69798400 | 4.17575700  | 0.64830400  |
| H | -0.87521100 | 2.29060300  | 1.23741600  |
| C | -1.46730200 | 5.53100400  | 0.42604800  |
| H | -0.00405200 | 7.10100100  | 0.42383300  |
| H | -2.26989800 | 6.19062200  | 0.11825000  |
| O | 2.91951000  | 3.34093000  | 1.13293800  |
| C | 1.59646700  | 1.72529700  | 2.24760000  |
| H | 0.59782600  | 1.48207200  | 2.59219400  |
| C | 2.64498600  | 0.91772200  | 2.48944000  |
| C | 2.62574900  | -0.37019500 | 3.17821400  |
| C | 1.43366700  | -1.03779500 | 3.50094800  |
| C | 3.84787000  | -0.95936400 | 3.53322600  |
| C | 1.46898000  | -2.25200100 | 4.17178100  |
| H | 0.47809200  | -0.61141300 | 3.21215200  |
| C | 3.88263400  | -2.17683200 | 4.20533000  |
| H | 4.77447600  | -0.44694700 | 3.28750500  |
| C | 2.69206700  | -2.82378400 | 4.52681000  |
| H | 0.54199000  | -2.75895300 | 4.41884200  |
| H | 4.83500200  | -2.61693700 | 4.48105900  |
| H | 2.71490700  | -3.77216400 | 5.05356700  |
| H | 3.62046400  | 1.26738900  | 2.15201900  |
| C | -4.04791200 | 4.41235900  | 0.33432500  |
| H | -4.91615100 | 3.75369700  | 0.33848000  |
| H | -4.10106500 | 5.08967700  | 1.19203100  |
| H | -4.03913300 | 4.99628900  | -0.59262700 |
| O | -2.90756500 | 3.56893600  | 0.42920700  |

I6-OMe

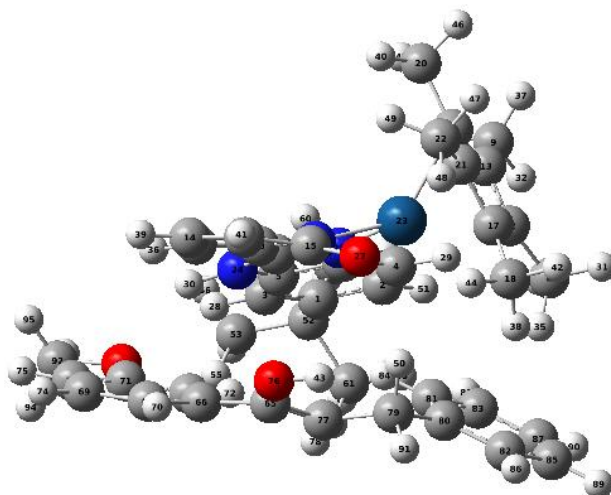

| <b>I6-OMe</b>                                  |                     |
|------------------------------------------------|---------------------|
| <b>SCF Done: E (RM062X)</b>                    | <b>-2121.621605</b> |
| <b>Thermal correction to Gibbs Free Energy</b> | <b>0.725736</b>     |

|    |             |             |             |
|----|-------------|-------------|-------------|
| C  | -3.92280100 | -2.45305400 | -0.63494600 |
| C  | -2.73599000 | -3.19898400 | -0.41609400 |
| C  | -3.82294000 | -1.09873600 | -0.93282600 |
| C  | -1.47078800 | -2.64453900 | -0.48290400 |
| C  | -2.54657300 | -0.54246500 | -1.00844100 |
| C  | -1.38036900 | -1.28723600 | -0.79421600 |
| C  | -0.78992400 | 0.79119900  | -1.12827700 |
| C  | 2.34468700  | -3.18478200 | 1.14882900  |
| C  | 1.58342800  | -3.59773700 | -1.97002200 |
| C  | 0.14149400  | 1.90734300  | -1.18495200 |
| C  | -0.17203000 | 3.18131500  | -1.54442100 |
| C  | 2.74604100  | -2.32068900 | 0.00297400  |
| C  | 2.41989700  | -2.51507500 | -1.36252200 |
| C  | 0.87188100  | 4.15476500  | -1.51068900 |
| C  | 2.37390100  | 2.47271400  | -0.53758500 |
| C  | 2.09834800  | 3.81433700  | -1.04420800 |
| C  | 3.65251200  | -1.16943900 | 0.09808800  |
| C  | 4.24450800  | -0.63941500 | 1.36077800  |
| C  | 3.07480100  | -1.46605300 | -2.11706500 |
| C  | 3.00978800  | -1.30313400 | -3.59791500 |
| C  | 3.90039700  | -0.68649800 | -1.21610400 |
| C  | 4.85356000  | 0.38173000  | -1.64188100 |
| Ir | 1.77019900  | -0.50142000 | -0.75646700 |
| N  | -2.13022800 | 0.76230200  | -1.24092200 |
| N  | -0.29820300 | -0.42342900 | -0.87830700 |
| N  | 1.40022800  | 1.51070600  | -0.78722800 |
| O  | 3.39399400  | 2.18667700  | 0.09141100  |
| H  | -4.69662800 | -0.47756100 | -1.08777000 |
| H  | -0.57998000 | -3.22494200 | -0.27104200 |

|   |             |             |             |
|---|-------------|-------------|-------------|
| H | -2.75374600 | 1.56542300  | -1.27260300 |
| H | 3.11372500  | -3.95053200 | 1.29984700  |
| H | 1.21454500  | -4.28544500 | -1.20798700 |
| H | 1.39292100  | -3.68563200 | 0.96683700  |
| H | 0.72610400  | -3.19178400 | -2.51412600 |
| H | 2.24726400  | -2.61166000 | 2.07183300  |
| H | -1.18455700 | 3.45499800  | -1.82145800 |
| H | 2.18973700  | -4.17643800 | -2.67335500 |
| H | 3.61297500  | -0.88776900 | 2.21789100  |
| H | 0.66371300  | 5.16983600  | -1.83242900 |
| H | 3.14353400  | -0.25910600 | -3.88657600 |
| H | 2.90629700  | 4.53111400  | -0.95751000 |
| H | 5.23031700  | -1.08811000 | 1.52215300  |
| H | 1.90229800  | 2.99466400  | 2.06846700  |
| H | 4.34318200  | 0.44543400  | 1.29277800  |
| H | 2.05553400  | -1.65855300 | -3.99192900 |
| H | 3.81104100  | -1.88913300 | -4.06183100 |
| H | 5.71383900  | -0.08962600 | -2.12845500 |
| H | 5.19046800  | 0.97260900  | -0.79300700 |
| H | 4.38850600  | 1.06598000  | -2.35579200 |
| H | 1.87291400  | 0.86991700  | 2.12116400  |
| H | -2.82282800 | -4.25309600 | -0.17208000 |
| C | -5.27293700 | -3.16362800 | -0.51449600 |
| C | -6.44484500 | -2.21268300 | -0.77459200 |
| H | -7.38556500 | -2.76159500 | -0.68219700 |
| H | -6.46859700 | -1.39204900 | -0.05016100 |
| H | -6.40590700 | -1.79089900 | -1.78415200 |
| C | -5.33778500 | -4.30770300 | -1.54043500 |
| H | -4.55240900 | -5.05033800 | -1.37417500 |
| H | -6.30124000 | -4.82058900 | -1.46412200 |
| H | -5.23303300 | -3.92395000 | -2.55947200 |
| C | -5.41685900 | -3.73602700 | 0.90641000  |
| H | -6.38428900 | -4.23649500 | 1.00990400  |
| H | -4.63793700 | -4.47055900 | 1.12976000  |
| H | -5.35979900 | -2.94056700 | 1.65541600  |
| C | -0.02255300 | 2.83957500  | 1.99708300  |
| C | -1.18401100 | 3.57848700  | 1.45023200  |
| C | -1.10718100 | 4.95550900  | 1.21322900  |
| C | -2.30388000 | 2.87449100  | 1.01344500  |
| C | -2.14245400 | 5.59751200  | 0.54441500  |
| H | -0.23033800 | 5.50453900  | 1.53550300  |
| C | -3.30369400 | 3.51487400  | 0.28651700  |
| H | -2.38376300 | 1.80279500  | 1.16176400  |
| C | -3.24193400 | 4.88960600  | 0.05692300  |
| H | -2.08932900 | 6.66777600  | 0.37345800  |
| H | -4.01714000 | 5.40662100  | -0.49557800 |
| O | 1.13860800  | 3.51595400  | 1.78592300  |
| C | -0.08411700 | 1.62241000  | 2.55316500  |
| H | -1.05966400 | 1.20073800  | 2.76404200  |
| C | 1.13515300  | 0.83006400  | 2.94454400  |
| C | 0.82680400  | -0.61785600 | 3.26696300  |
| C | -0.17426000 | -1.31631900 | 2.58291500  |
| C | 1.52945900  | -1.28348600 | 4.27573000  |
| C | -0.48326200 | -2.63285500 | 2.91684900  |

|   |             |             |             |
|---|-------------|-------------|-------------|
| H | -0.73446000 | -0.81626500 | 1.79722400  |
| C | 1.23550800  | -2.60683800 | 4.60051600  |
| H | 2.30092500  | -0.75214500 | 4.82783000  |
| C | 0.22137500  | -3.28412100 | 3.92667200  |
| H | -1.28435100 | -3.14351000 | 2.38977000  |
| H | 1.78423400  | -3.10064900 | 5.39597400  |
| H | -0.02440700 | -4.30622700 | 4.19539500  |
| H | 1.63445700  | 1.27806000  | 3.81567600  |
| C | -5.40735200 | 3.29349700  | -0.81444800 |
| H | -6.09004000 | 2.48326200  | -1.06816200 |
| H | -5.88530100 | 3.96215600  | -0.09199600 |
| H | -5.15620600 | 3.85535600  | -1.72081400 |
| O | -4.25696800 | 2.68309000  | -0.24785800 |

## 9. Spectral Data for the Transfer Hydrogenation of $\alpha,\beta$ -Unsaturated Ketones and Imines

### 1,3-diphenylpropan-1-one (2):<sup>9</sup>

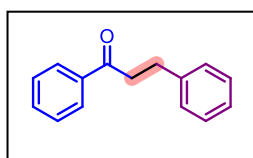

Purified by column chromatography using silica gel and ethyl acetate-hexane as eluent 92% (96.7 mg) isolated yield; white solid.  $^1\text{H NMR}$  (400 MHz,  $\text{CDCl}_3$ ):  $\delta$  = 77.95 (d,  $J_{\text{H,H}} = 7.7$  Hz, 2H), 7.55 (t,  $J_{\text{H,H}} = 7.4$  Hz, 1H), 7.44 (t,  $J_{\text{H,H}} = 7.6$  Hz, 2H), 7.25 (m, 5H), 3.30 (t,  $J_{\text{H,H}} = 7.7$  Hz, 2H), 3.07 (t,  $J_{\text{H,H}} = 7.7$  Hz, 2H).  $^{13}\text{C}\{^1\text{H}\}$  NMR (125 MHz,  $\text{CDCl}_3$ ):  $\delta$  = 199.3, 141.4, 137.0, 133.1, 128.7, 128.6, 128.5, 128.1, 126.2, 40.5, 30.2.

### 3-phenyl-1-(p-tolyl)propan-1-one (3):<sup>10</sup>

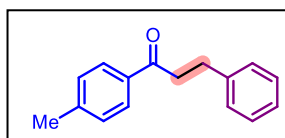

Purified by column chromatography using silica gel and ethyl acetate-hexane as eluent 84% (94.2 mg) isolated yield; white solid.  $^1\text{H NMR}$  (500 MHz,  $\text{CDCl}_3$ ):  $\delta$  = 7.94 (dd,  $J_{\text{H,H}} = 8.4, 1.3$  Hz, 2H), 7.54 (t,  $J_{\text{H,H}} = 7.4$  Hz, 1H), 7.44 (t,  $J_{\text{H,H}} = 7.8$  Hz, 2H), 7.16 – 7.06 (m, 4H), 3.27 (t,  $J_{\text{H,H}} = 7.3$  Hz, 2H), 3.02 (t,  $J_{\text{H,H}} = 7.9$  Hz, 2H), 2.31 (s, 3H).  $^{13}\text{C}\{^1\text{H}\}$  NMR (125 MHz,  $\text{CDCl}_3$ ):  $\delta$  = 199.4, 138.2, 136.9, 135.7, 133.1, 129.3, 128.7, 128.4, 128.1, 40.7, 29.8, 21.1.

### 1-(4-methoxyphenyl)-3-phenylpropan-1-one (4):<sup>10</sup>

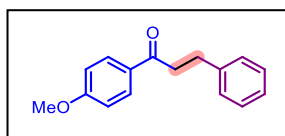

Purified by column chromatography using silica gel and ethyl acetate-hexane as eluent 80% (96.1 mg) isolated yield; white solid.  $^1\text{H NMR}$  (400 MHz,  $\text{CDCl}_3$ ):  $\delta$  = 7.92 (d,  $J_{\text{H,H}} = 8.6$  Hz, 2H), 7.32-7.15 (m, 5H), 6.90 (d,  $J_{\text{H,H}} = 8.6$  Hz, 2H), 3.84 (s, 3H), 3.23 (t,  $J_{\text{H,H}} = 7.9$  Hz, 2H), 3.04 (t,  $J_{\text{H,H}} = 7.7$  Hz, 2H).  $^{13}\text{C}\{^1\text{H}\}$  NMR (100 MHz,  $\text{CDCl}_3$ ):  $\delta$  = 197.9, 163.5, 141.6, 130.4, 130.1, 128.7, 128.6, 128.5, 126.2, 113.8, 55.5, 40.2, 30.4.

### 3-phenyl-1-(4-(trifluoromethyl)phenyl)propan-1-one (5):<sup>11</sup>

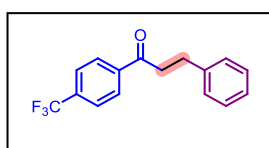

Purified by column chromatography using silica gel and ethyl acetate-hexane as eluent 95% (132.2 mg) isolated yield; white solid.  $^1\text{H NMR}$  (400 MHz,  $\text{CDCl}_3$ ):  $\delta$  = 8.04 (d,  $J_{\text{H,H}} = 8.1$  Hz, 2H), 7.71 (d,  $J_{\text{H,H}} = 8.4$  Hz, 2H), 7.36 – 7.17 (m, 5H), 3.32 (t,  $J_{\text{H,H}} = 7.6$  Hz, 2H), 3.09 (t,  $J_{\text{H,H}} = 7.6$  Hz, 2H).  $^{13}\text{C}\{^1\text{H}\}$  NMR (100 MHz,  $\text{CDCl}_3$ ):  $\delta$  = 198.2, 140.9, 139.6, 134.9 (q,  $J_{\text{C,F}} = 32.0$  Hz), 128.7, 128.5, 128.4, 126.3, 125.7 (d,  $J_{\text{C,F}} = 5.0$  Hz), 125.0 (d,  $J_{\text{C,F}} = 271.0$  Hz), 40.8, 30.0.



### 1-(4-chlorophenyl)-3-phenylpropan-1-one (6):<sup>12</sup>

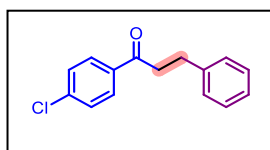

Purified by column chromatography using silica gel and ethyl acetate-hexane as eluent 90% (110.1 mg) isolated yield; white solid. <sup>1</sup>H NMR (400 MHz, CDCl<sub>3</sub>): δ = 7.87 (d, *J*<sub>H,H</sub> = 8.5 Hz, 2H), 7.41 (d, *J*<sub>H,H</sub> = 8.5 Hz, 2H), 7.32 – 7.26 (m, 2H), 7.25 – 7.18 (m, 3H), 3.26 (t, *J*<sub>H,H</sub> = 7.7 Hz, 2H), 3.05 (t, *J*<sub>H,H</sub> = 7.7 Hz, 2H). <sup>13</sup>C{<sup>1</sup>H} NMR (100 MHz, CDCl<sub>3</sub>): δ = 198.0, 141.1, 139.6, 135.3, 129.5, 129.0, 128.6, 128.5, 126.3, 40.5, 30.1.

### 1-(3-methoxyphenyl)-3-phenylpropan-1-one (7):<sup>13</sup>

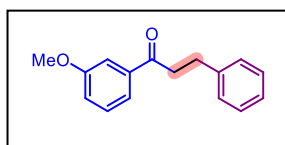

Purified by column chromatography using silica gel and ethyl acetate-hexane as eluent 85% (102.1 mg) isolated yield; white solid. <sup>1</sup>H NMR (400 MHz, CDCl<sub>3</sub>): δ = 7.55 – 7.48 (m, 2H), 7.36 – 7.19 (m, 6H), 7.09 (dd, *J*<sub>H,H</sub> = 8.2, 2.7 Hz, 1H), 3.83 (s, 3H), 3.28 (t, *J*<sub>H,H</sub> = 8.1 Hz, 2H), 3.06 (t, *J*<sub>H,H</sub> = 7.6 Hz, 2H). <sup>13</sup>C{<sup>1</sup>H} NMR (100 MHz, CDCl<sub>3</sub>): δ = 199.0, 159.8, 141.3, 138.2, 129.6, 128.5, 128.4, 126.1, 120.7, 119.5, 112.3, 55.4, 40.5, 30.2.

### 1-(3-chlorophenyl)-3-phenylpropan-1-one (8):<sup>14</sup>

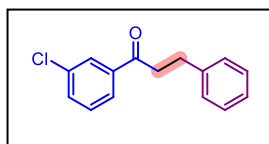

Purified by column chromatography using silica gel and ethyl acetate-hexane as eluent 91% (111.4 mg) isolated yield; white solid. <sup>1</sup>H NMR (400 MHz, CDCl<sub>3</sub>): δ = 7.90 (s, 1H), 7.80 (d, *J*<sub>H,H</sub> = 7.6 Hz, 1H), 7.53 – 7.47 (m, 1H), 7.37 (t, *J*<sub>H,H</sub> = 7.9 Hz, 1H), 7.31 – 7.18 (m, 5H), 3.26 (t, *J*<sub>H,H</sub> = 7.7 Hz, 2H), 3.05 (t, *J*<sub>H,H</sub> = 7.6 Hz, 2H). <sup>13</sup>C{<sup>1</sup>H} NMR (100 MHz, CDCl<sub>3</sub>): δ = 197.9, 141.0, 138.4, 135.0, 133.0, 130.0, 128.6, 128.5, 128.2, 126.3, 126.1, 40.6, 30.0.

### 1-(2-methoxyphenyl)-3-phenylpropan-1-one (9):<sup>15</sup>

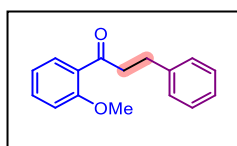

Purified by column chromatography using silica gel and ethyl acetate-hexane as eluent 80% (96.1 mg) isolated yield; colourless oil. <sup>1</sup>H NMR (400 MHz, CDCl<sub>3</sub>): δ = 7.69 (dd, *J*<sub>H,H</sub> = 7.8, 1.8 Hz, 1H), 7.45 (td, *J*<sub>H,H</sub> = 7.9, 2.0 Hz, 1H), 7.30 – 7.17 (m, 5H), 7.01 – 6.93 (m, 2H), 3.87 (s, 3H), 3.30 (t, *J*<sub>H,H</sub> = 8.4 Hz, 2H), 3.02 (t, *J*<sub>H,H</sub> = 7.8 Hz, 2H). <sup>13</sup>C{<sup>1</sup>H} NMR (100 MHz, CDCl<sub>3</sub>): δ = 201.8, 158.6, 141.8, 133.5, 130.4, 128.5, 128.4, 128.3, 125.9, 120.7, 111.5, 55.5, 45.5, 30.5.

### 1-(2-chlorophenyl)-3-phenylpropan-1-one (10):<sup>15</sup>

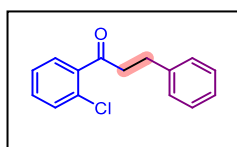

Purified by column chromatography using silica gel and ethyl acetate-hexane as eluent 84% (102.8 mg) isolated yield; colourless oil. <sup>1</sup>H NMR (400 MHz, CDCl<sub>3</sub>): δ = 7.39 – 7.32 (m, 3H), 7.29 – 7.23 (m, 3H), 7.22 – 7.14 (m, 3H), 3.25 (t, *J*<sub>H,H</sub> = 8.3 Hz, 2H), 3.03 (t, *J*<sub>H,H</sub> = 7.7 Hz, 2H). <sup>13</sup>C{<sup>1</sup>H} NMR (125 MHz, CDCl<sub>3</sub>): δ = 202.6, 140.8, 139.5, 131.8, 131.0, 130.6, 129.0, 128.6, 128.5, 127.0, 126.3, 44.6,

30.3.

### 4-(3-phenylpropanoyl)benzamide (11):<sup>16</sup>

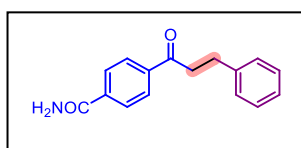

Purified by column chromatography using silica gel and ethyl acetate-hexane as eluent 81% (102.6 mg) isolated yield; white solid. <sup>1</sup>H NMR (500 MHz, DMSO-*d*<sub>6</sub>): δ = 8.14 (s, 1H), 8.03 (d, *J*<sub>H,H</sub> = 8.4 Hz, 2H), 7.96 (d, *J*<sub>H,H</sub> = 8.3 Hz, 2H), 7.54 (s, 1H), 7.27 (d, *J*<sub>H,H</sub> = 4.5 Hz, 4H), 7.23 – 7.10 (m, 1H), 3.38 (t, *J*<sub>H,H</sub> = 7.6 Hz, 2H), 2.94 (t, *J*<sub>H,H</sub> = 7.6 Hz, 2H). <sup>13</sup>C{<sup>1</sup>H} NMR (125 MHz, DMSO-*d*<sub>6</sub>): δ = 199.1, 167.3, 141.2, 138.5, 138.1, 128.5, 128.3, 127.9, 127.9, 126.0, 40.0, 29.5.

#### 4-(3-phenylpropanoyl)benzonitrile (12):<sup>17</sup>

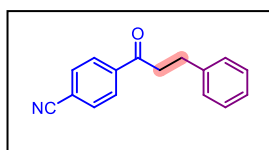

Purified by column chromatography using silica gel and ethyl acetate-hexane as eluent 75% (88.2 mg) isolated yield; white solid. <sup>1</sup>H NMR (500 MHz, CDCl<sub>3</sub>): δ = 8.00 (d, *J*<sub>H,H</sub> = 8.9 Hz, 2H), 7.73 (d, *J*<sub>H,H</sub> = 8.5 Hz, 2H), 7.28 (t, *J*<sub>H,H</sub> = 7.6 Hz, 2H), 7.20 (dd, *J*<sub>H,H</sub> = 14.3, 7.2 Hz, 3H), 3.29 (t, *J*<sub>H,H</sub> = 7.7 Hz, 2H), 3.06 (t, *J*<sub>H,H</sub> = 7.7 Hz, 2H). <sup>13</sup>C{<sup>1</sup>H} NMR (125 MHz, CDCl<sub>3</sub>): δ = 197.9, 140.7, 139.8, 132.6, 128.7, 128.5, 126.4, 118.0, 116.4, 40.8, 29.9.

#### 3-phenyl-1-(4-styrylphenyl)propan-1-one (13):<sup>4</sup>

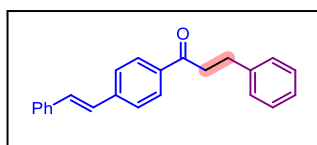

Purified by column chromatography using silica gel and ethyl acetate-hexane as eluent 88% (137.5 mg) isolated yield; white solid. <sup>1</sup>H NMR (400 MHz, CDCl<sub>3</sub>): δ = 8.00 (d, *J*<sub>H,H</sub> = 8.9 Hz, 2H), 7.73 (d, *J*<sub>H,H</sub> = 8.5 Hz, 2H), 7.28 (t, *J*<sub>H,H</sub> = 7.6 Hz, 2H), 7.20 (dd, *J*<sub>H,H</sub> = 14.3, 7.2 Hz, 3H), 3.29 (t, *J*<sub>H,H</sub> = 7.9 Hz, 2H), 3.06 (t, *J*<sub>H,H</sub> = 7.7 Hz, 2H). <sup>13</sup>C{<sup>1</sup>H} NMR (125 MHz, CDCl<sub>3</sub>): δ = 198.7, 142.1, 141.4, 136.8, 135.7, 131.5, 128.9, 128.7, 128.6, 128.5, 128.4, 127.5, 126.9, 126.6, 126.2, 40.5, 30.3.

#### 3-phenyl-1-(4-(phenylethynyl)phenyl)propan-1-one (14):<sup>4</sup>

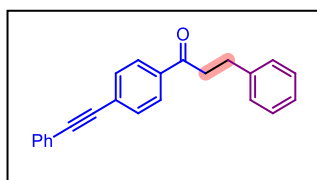

Purified by column chromatography using silica gel and ethyl acetate-hexane as eluent 85% (131.9 mg) isolated yield; white solid. <sup>1</sup>H NMR (400 MHz, CDCl<sub>3</sub>): δ = 7.91 (d, *J*<sub>H,H</sub> = 7.9 Hz, 2H), 7.55 (dd, *J*<sub>H,H</sub> = 20.4, 6.6 Hz, 4H), 7.36 – 7.21 (m, 8H), 3.28 (t, *J*<sub>H,H</sub> = 7.8 Hz, 2H), 3.05 (t, *J*<sub>H,H</sub> = 7.7 Hz, 2H). <sup>13</sup>C{<sup>1</sup>H} NMR (100 MHz, CDCl<sub>3</sub>): δ = 198.5, 141.3, 136.0, 131.8, 128.9, 128.8, 128.6, 128.5, 128.2, 128.1, 127.9, 126.3, 122.7, 92.8, 88.7, 40.6, 30.2.

#### 1-phenyl-3-(p-tolyl)propan-1-one (15):<sup>4</sup>

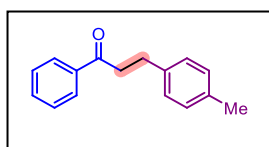

Purified by column chromatography using silica gel and ethyl acetate-hexane as eluent 86% (96.4 mg) isolated yield; white solid. <sup>1</sup>H NMR (500 MHz, CDCl<sub>3</sub>): δ = 7.94 (d, *J*<sub>H,H</sub> = 7.3 Hz, 2H), 7.54 (t, *J*<sub>H,H</sub> = 7.4 Hz, 1H), 7.44 (t, *J*<sub>H,H</sub> = 7.7 Hz, 2H), 7.15 – 7.08 (m, 4H), 3.27 (t, *J*<sub>H,H</sub> = 8.2 Hz, 2H), 3.02 (t, *J*<sub>H,H</sub> = 7.6 Hz, 2H), 2.31 (s, 3H). <sup>13</sup>C{<sup>1</sup>H} NMR (125 MHz, CDCl<sub>3</sub>): δ = 199.4, 138.3, 137.0, 135.7, 133.1, 129.3, 128.7, 128.4, 128.1, 40.7, 29.8, 21.1.

#### 3-(4-bromophenyl)-1-phenylpropan-1-one (16):<sup>13</sup>

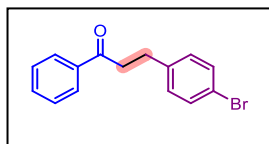

Purified by column chromatography using silica gel and ethyl acetate-hexane as eluent 85% (122.9 mg) isolated yield; white solid. <sup>1</sup>H NMR (400 MHz, CDCl<sub>3</sub>): δ = 7.93 (d, *J*<sub>H,H</sub> = 7.3 Hz, 2H), 7.54 (t, *J*<sub>H,H</sub> = 7.3 Hz, 1H), 7.44 (t, *J*<sub>H,H</sub> = 7.7 Hz, 2H), 7.39 (d, *J*<sub>H,H</sub> = 8.5 Hz, 2H), 7.11 (d, *J*<sub>H,H</sub> = 8.5 Hz, 2H), 3.26 (t, *J*<sub>H,H</sub> = 7.4 Hz, 2H), 3.01 (t, *J*<sub>H,H</sub> = 7.4 Hz, 2H). <sup>13</sup>C{<sup>1</sup>H} NMR (100 MHz, CDCl<sub>3</sub>): δ = 198.9, 140.3, 136.8, 133.3, 131.6, 130.3, 128.7, 128.1, 120.0, 40.2, 29.5.

#### 1-phenyl-3-(4-(trifluoromethyl)phenyl)propan-1-one (17):<sup>17</sup>

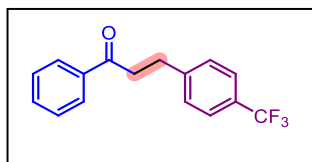

Purified by column chromatography using silica gel and ethyl acetate-hexane as eluent 95% (132.2 mg) isolated yield; white solid.  $^1\text{H NMR}$  (400 MHz,  $\text{CDCl}_3$ ):  $\delta$  = 7.94 (d,  $J_{\text{H,H}} = 7.7$  Hz, 2H), 7.55 (dd,  $J_{\text{H,H}} = 11.6, 7.8$  Hz, 3H), 7.47 – 7.41 (m, 2H), 7.35 (d,  $J_{\text{H,H}} = 8.2$  Hz, 2H), 3.31 (t,  $J_{\text{H,H}} = 7.5$  Hz, 2H), 3.12 (t,  $J_{\text{H,H}} = 7.5$  Hz, 2H).  $^{13}\text{C}\{^1\text{H}\}$  NMR (100 MHz,  $\text{CDCl}_3$ ):  $\delta$  = 198.7, 145.5, 136.7, 133.3, 128.9, 128.8, 128.1, 125.5, 125.5, 125.5, 39.9, 29.8.

### 3-(4-nitrophenyl)-1-phenylpropan-1-one (18):<sup>4</sup>

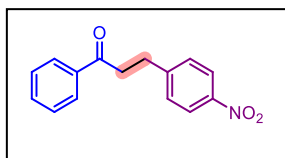

Purified by column chromatography using silica gel and ethyl acetate-hexane as eluent 85% (108.4 mg) isolated yield; white solid.  $^1\text{H NMR}$  (500 MHz,  $\text{CDCl}_3$ ):  $\delta$  = 8.13 (d,  $J_{\text{H,H}} = 8.2$  Hz, 2H), 7.93 (d,  $J_{\text{H,H}} = 7.9$  Hz, 2H), 7.55 (d,  $J_{\text{H,H}} = 7.2$  Hz, 1H), 7.44 (t,  $J_{\text{H,H}} = 7.6$  Hz, 2H), 7.40 (d,  $J_{\text{H,H}} = 8.4$  Hz, 2H), 3.34 (t,  $J_{\text{H,H}} = 7.5$  Hz, 2H), 3.17 (t,  $J_{\text{H,H}} = 7.3$  Hz, 2H).  $^{13}\text{C}\{^1\text{H}\}$  NMR (125 MHz,  $\text{CDCl}_3$ ):  $\delta$  = 198.2, 149.3, 146.6, 136.6, 133.4, 129.4, 128.8, 128.1, 123.8, 39.5, 29.8.

### Methyl 4-(3-oxo-3-phenylpropyl)benzoate (19):<sup>18</sup>

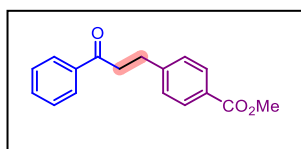

Purified by column chromatography using silica gel and ethyl acetate-hexane as eluent 82% (110 mg) isolated yield; white solid.  $^1\text{H NMR}$  (400 MHz,  $\text{CDCl}_3$ ):  $\delta$  = 7.94 (d,  $J_{\text{H,H}} = 7.7$  Hz, 2H), 7.55 (dd,  $J_{\text{H,H}} = 11.6, 7.8$  Hz, 3H), 7.47 – 7.41 (m, 2H), 7.35 (d,  $J_{\text{H,H}} = 8.2$  Hz, 2H), 3.31 (t,  $J_{\text{H,H}} = 7.5$  Hz, 2H), 3.12 (t,  $J_{\text{H,H}} = 7.5$  Hz, 2H).  $^{13}\text{C}\{^1\text{H}\}$  NMR (100 MHz,  $\text{CDCl}_3$ ):  $\delta$  = 198.8, 167.1, 146.9, 136.8, 133.3, 129.9, 128.7, 128.6, 128.2, 128.1, 52.1, 39.9, 30.1.

### 4-(3-oxo-3-phenylpropyl)benzoic acid (20):<sup>19</sup>

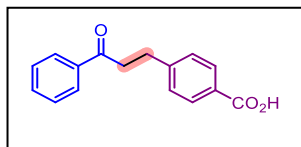

Purified by column chromatography using silica gel and ethyl acetate-hexane as eluent 78% (99.2 mg) isolated yield; white solid.  $^1\text{H NMR}$  (500 MHz,  $\text{DMSO}-d_6$ ):  $\delta$  = 7.98 (d,  $J_{\text{H,H}} = 7.6$  Hz, 2H), 7.87 (s, 2H), 7.62 (t,  $J_{\text{H,H}} = 7.3$  Hz, 1H), 7.51 (t,  $J_{\text{H,H}} = 7.6$  Hz, 2H), 7.41 (d,  $J_{\text{H,H}} = 8.0$  Hz, 2H), 3.40 (t,  $J_{\text{H,H}} = 7.4$  Hz, 2H), 3.01 (t,  $J_{\text{H,H}} = 7.5$  Hz, 2H).  $^{13}\text{C}\{^1\text{H}\}$  NMR (125 MHz,  $\text{DMSO}-d_6$ ):  $\delta$  = 198.9, 146.7, 136.5, 133.2, 128.7, 127.9, 39.8, 29.4.

### 1-(naphthalen-2-yl)-3-phenylpropan-1-one (21):<sup>15</sup>

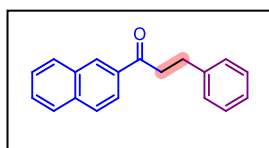

Purified by column chromatography using silica gel and ethyl acetate-hexane as eluent 87% (113.2 mg) isolated yield; white solid.  $^1\text{H NMR}$  (400 MHz,  $\text{CDCl}_3$ ):  $\delta$  = 8.45 (s, 1H), 8.03 (d,  $J_{\text{H,H}} = 8.4$  Hz, 1H), 7.96 – 7.83 (m, 3H), 7.56 (dt,  $J_{\text{H,H}} = 20.8, 7.0$  Hz, 2H), 7.35 – 7.16 (m, 5H), 3.43 (t,  $J_{\text{H,H}} = 7.9$  Hz, 2H), 3.12 (t,  $J_{\text{H,H}} = 7.5$  Hz, 2H).  $^{13}\text{C}\{^1\text{H}\}$  NMR (100 MHz,  $\text{CDCl}_3$ ):  $\delta$  = 199.2, 141.4, 135.7, 134.3, 132.6, 129.8, 129.6, 129.1, 128.6, 128.6, 128.5, 127.9, 126.9, 126.3, 123.9, 40.6, 30.4.

### 3-(naphthalen-1-yl)-1-phenylpropan-1-one (22):<sup>20</sup>

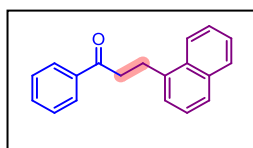

Purified by column chromatography using silica gel and ethyl acetate-hexane as eluent 88% (114.5 mg) isolated yield; white solid.  $^1\text{H NMR}$  (500 MHz,  $\text{CDCl}_3$ ):  $\delta$  = 8.04 (d,  $J_{\text{H,H}} = 7.9$  Hz, 1H), 7.96 – 7.93 (m, 2H), 7.86 (d,  $J_{\text{H,H}} = 8.3$  Hz, 1H), 7.75 – 7.70 (m, 1H), 7.54 – 7.38 (m, 7H), 3.53 (t,  $J_{\text{H,H}} = 7.9$  Hz, 2H), 3.42 (t,  $J_{\text{H,H}} = 7.5$  Hz, 2H).  $^{13}\text{C}\{^1\text{H}\}$  NMR (125 MHz,  $\text{CDCl}_3$ ):  $\delta$  = 199.4, 137.4, 136.9, 133.2, 129.0, 128.7, 128.1, 127.1, 126.2, 126.2, 125.7, 125.7, 123.6, 39.8, 27.3.

### 3-phenyl-1-(pyridin-3-yl)propan-1-one (23):<sup>13</sup>

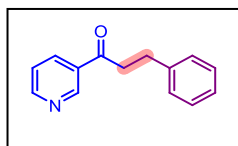

Purified by column chromatography using silica gel and ethyl acetate-hexane as eluent 84% (88.7 mg) isolated yield; white solid.  $^1\text{H NMR}$  (400 MHz,  $\text{CDCl}_3$ ):  $\delta$  = 9.11 (d,  $J_{\text{H,H}} = 2.2$  Hz, 1H), 8.76 – 8.68 (m, 1H), 8.17 (dd,  $J_{\text{H,H}} = 7.9, 2.4$  Hz, 1H), 7.36 (dt,  $J_{\text{H,H}} = 7.6, 3.1$  Hz, 1H), 7.22 (m, 6H), 3.27 (t,  $J_{\text{H,H}} = 7.6$  Hz, 2H), 3.04 (t,  $J_{\text{H,H}} = 7.6$  Hz, 2H).  $^{13}\text{C}\{^1\text{H}\}$  NMR (100 MHz,  $\text{CDCl}_3$ ):  $\delta$  = 198.0, 153.5, 149.6, 140.7, 135.3, 132.0, 128.6, 128.4, 126.3, 123.6, 40.7, 29.8.

### 3-phenyl-1-(thiophen-2-yl)propan-1-one (24):<sup>4</sup>

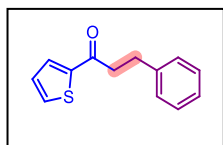

Purified by column chromatography using silica gel and ethyl acetate-hexane as eluent 86% (42 mg) isolated yield; white solid.  $^1\text{H NMR}$  (500 MHz,  $\text{CDCl}_3$ ):  $\delta$  = 7.96 (d,  $J_{\text{H,H}} = 7.7$  Hz, 2H), 7.55 (t,  $J_{\text{H,H}} = 7.6$  Hz, 1H), 7.45 (t,  $J_{\text{H,H}} = 7.6$  Hz, 2H), 7.11 (d,  $J_{\text{H,H}} = 5.1$  Hz, 1H), 6.91 (t,  $J_{\text{H,H}} = 4.3$  Hz, 1H), 6.86 (d,  $J_{\text{H,H}} = 3.4$  Hz, 1H), 3.34 (t,  $J_{\text{H,H}} = 6.9$  Hz, 2H), 3.29 (t,  $J_{\text{H,H}} = 8.1$  Hz, 2H).  $^{13}\text{C}\{^1\text{H}\}$  NMR (125 MHz,  $\text{CDCl}_3$ ):  $\delta$  = 198.6, 143.9, 136.8, 133.2, 128.7, 128.1, 128.1, 126.9, 124.7, 123.4, 40.6, 24.2.

### 3-phenyl-1-(ferrocenyl)propan-1-one (25):<sup>21</sup>

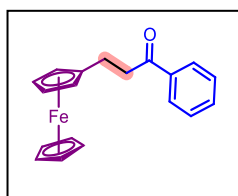

Purified by column chromatography using silica gel and ethyl acetate-hexane as eluent 80% (139.3 mg) isolated yield; white solid.  $^1\text{H NMR}$  (400 MHz,  $\text{CDCl}_3$ ):  $\delta$  = 7.98 – 7.91 (m, 2H), 7.57 – 7.51 (m, 1H), 7.45 (t,  $J_{\text{H,H}} = 7.7$  Hz, 2H), 4.11 (s, 4H), 4.10 – 4.08 (m, 2H), 4.05 (q,  $J_{\text{H,H}} = 2.3, 1.8$  Hz, 2H), 3.18 (t,  $J_{\text{H,H}} = 8.1$  Hz, 2H), 2.77 (t,  $J_{\text{H,H}} = 7.5$  Hz, 2H).  $^{13}\text{C}\{^1\text{H}\}$  NMR (100 MHz,  $\text{CDCl}_3$ ):  $\delta$  = 199.6, 137.0, 133.1, 128.7, 128.1, 88.1, 68.6, 68.2, 67.4, 40.4, 24.2.

### 1-(benzo[1,3]dioxol-5-yl)-3-phenylpropan-1-one (26):<sup>4</sup>

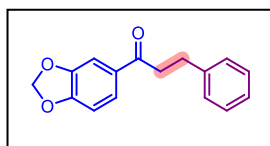

Purified by column chromatography using silica gel and ethyl acetate-hexane as eluent 82% (104.3 mg) isolated yield; white solid.  $^1\text{H NMR}$  (500 MHz,  $\text{CDCl}_3$ ):  $\delta$  = 7.54 (d,  $J_{\text{H,H}} = 7.8$  Hz, 1H), 7.43 (d,  $J_{\text{H,H}} = 1.5$  Hz, 1H), 7.29 (t,  $J_{\text{H,H}} = 7.5$  Hz, 2H), 7.25 – 7.18 (m, 3H), 6.82 (d,  $J_{\text{H,H}} = 7.7$  Hz, 1H), 6.02 (s, 2H), 3.21 (t,  $J_{\text{H,H}} = 8.3$  Hz, 2H), 3.04 (t,  $J_{\text{H,H}} = 7.5$  Hz, 2H).  $^{13}\text{C}\{^1\text{H}\}$  NMR (125 MHz,  $\text{CDCl}_3$ ):  $\delta$  = 197.4, 151.8, 148.3, 141.4, 131.8, 128.6, 128.5, 126.2, 124.3, 107.9, 107.9, 101.9, 40.3, 30.4.

### 1-mesityl-3-phenylpropan-1-one (27):<sup>22</sup>

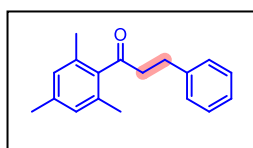

Purified by column chromatography using silica gel and ethyl acetate-hexane as eluent 80% (100.9 mg) isolated yield; white solid.  $^1\text{H NMR}$  (400 MHz,  $\text{CDCl}_3$ ):  $\delta$  = 7.31 – 7.18 (m, 5H), 6.82 (s, 2H), 3.07 – 3.00 (m, 4H), 2.27 (s, 3H), 2.13 (s, 6H).  $^{13}\text{C}\{^1\text{H}\}$  NMR (100 MHz,  $\text{CDCl}_3$ ):  $\delta$  = 209.8, 141.0, 139.5, 138.4, 132.6, 128.6, 128.5, 126.2, 46.4, 29.6, 21.1, 19.1.

### 1-(2,3,4,5,6-pentamethylphenyl)-3-phenylpropan-1-one (28):<sup>23</sup>

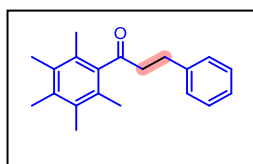

Purified by column chromatography using silica gel and ethyl acetate-hexane as eluent 77% (107.9 mg) isolated yield; white solid.  $^1\text{H NMR}$  (400 MHz,  $\text{CDCl}_3$ ):  $\delta$  = 7.21 (m, 5H), 3.07 – 3.02 (m, 2H), 3.00 – 2.95 (m, 2H), 2.20 (s, 3H), 2.15 (s, 6H), 2.02 (s, 6H).  $^{13}\text{C}\{^1\text{H}\}$  NMR (100 MHz,  $\text{CDCl}_3$ ):  $\delta$  = 211.0, 141.1, 140.5, 135.5, 133.2, 128.6, 128.5, 127.4, 126.1, 47.1, 29.4, 17.2, 16.7, 16.0.

### 3,3'-(1,3-phenylene)bis(1-(p-tolyl)propan-1-one) (29):

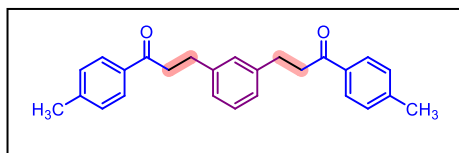

Purified by column chromatography using silica gel and ethyl acetate-hexane as eluent 80% (148.2 mg) isolated yield; white solid.  $^1\text{H NMR}$  (500 MHz,  $\text{CDCl}_3$ ):  $\delta$  = 7.88 (d,  $J_{\text{H,H}}$  = 7.9 Hz, 4H), 7.29 – 7.26 (m, 5H), 7.16 – 7.11 (m, 3H), 3.28 (t,  $J_{\text{H,H}}$  = 7.8 Hz, 4H), 3.06 (t,  $J_{\text{H,H}}$  = 7.9 Hz, 4H), 2.43 (s, 6H).  $^{13}\text{C}\{^1\text{H}\}$  NMR (125 MHz,  $\text{CDCl}_3$ ):  $\delta$  = 199.0, 143.9, 141.7, 134.5, 129.3, 128.8, 128.7, 128.3, 126.3, 40.4, 30.3, 21.7. **ESI-MS**: Calcd for  $\text{C}_{26}\text{H}_{27}\text{O}_2^+$ ,  $[\text{M}+\text{H}]^+$ , 371.2011; found, 371.2046.

### 3,3'-(1,3-phenylene)bis(1-(4-(trifluoromethyl)phenyl)propan-1-one) (30):

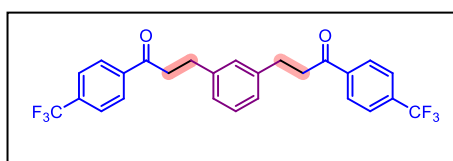

Purified by column chromatography using silica gel and ethyl acetate-hexane as eluent 87% (208.1 mg) isolated yield; white solid.  $^1\text{H NMR}$  (400 MHz,  $\text{CDCl}_3$ ):  $\delta$  = 7.94 (d,  $J_{\text{H,H}}$  = 7.7 Hz, 2H), 7.54 (dd,  $J_{\text{H,H}}$  = 7.4, 4.6 Hz, 4H), 7.44 (t,  $J_{\text{H,H}}$  = 7.6 Hz, 3H), 7.36 (d,  $J_{\text{H,H}}$  = 7.9 Hz, 3H), 3.31 (t,  $J_{\text{H,H}}$  = 7.4 Hz, 4H), 3.12 (t,  $J_{\text{H,H}}$  = 7.4 Hz, 4H).  $^{13}\text{C}\{^1\text{H}\}$  NMR (100 MHz,  $\text{CDCl}_3$ ):  $\delta$  = 198.6, 145.5, 136.7, 133.3, 128.9, 128.7, 128.1, 125.7, 125.5, 125.5, 123.0, 39.9, 29.8. **ESI-MS**: Calcd for  $\text{C}_{26}\text{H}_{20}\text{F}_6\text{O}_2^+$ ,  $[\text{M}]^+$ , 478.1367; found, 478.1366.

### 3-phenyl-1-(1,2,3,4-tetrahydronaphthalen-2-yl)propan-1-one (31):<sup>13</sup>

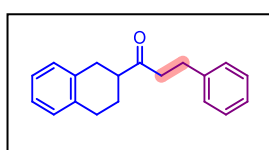

Purified by column chromatography using silica gel and ethyl acetate-hexane as eluent 82% (108.4 mg) isolated yield; white solid.  $^1\text{H NMR}$  (400 MHz,  $\text{CDCl}_3$ ):  $\delta$  = 8.08 (d,  $J_{\text{H,H}}$  = 7.9 Hz, 1H), 7.47 – 7.43 (m, 1H), 7.31 (t,  $J_{\text{H,H}}$  = 7.5 Hz, 3H), 7.25 – 7.20 (m, 4H), 3.50 (dd,  $J_{\text{H,H}}$  = 13.7, 3.9 Hz, 1H), 2.92 (dt,  $J_{\text{H,H}}$  = 8.9, 4.4 Hz, 2H), 2.77 – 2.70 (m, 1H), 2.65 (dd,  $J_{\text{H,H}}$  = 13.6, 9.5 Hz, 1H), 2.13 – 2.08 (m, 1H), 1.81 – 1.73 (m, 1H).  $^{13}\text{C}\{^1\text{H}\}$  NMR (100 MHz,  $\text{CDCl}_3$ ):  $\delta$  = 199.4, 144.0, 140.1, 133.3, 132.5, 129.3, 128.7, 128.4, 127.5, 126.6, 126.1, 49.4, 35.7, 28.6, 27.7.

### 1-phenyloctan-1-one (32):<sup>24</sup>

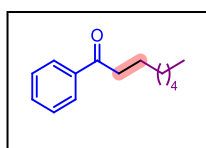

Purified by column chromatography using silica gel and ethyl acetate-hexane as eluent 75% (76.6 mg) isolated yield; white solid.  $^1\text{H NMR}$  (400 MHz,  $\text{CDCl}_3$ ):  $\delta$  = 7.94 (d,  $J_{\text{H,H}}$  = 7.6 Hz, 2H), 7.53 (t,  $J_{\text{H,H}}$  = 7.3 Hz, 1H), 7.43 (t,  $J_{\text{H,H}}$  = 7.6 Hz, 2H), 2.94 (t,  $J_{\text{H,H}}$  = 7.6 Hz, 2H), 1.71 (q,  $J_{\text{H,H}}$  = 7.4 Hz, 2H), 1.34 – 1.24 (m, 8H), 0.88 – 0.84 (m, 3H).  $^{13}\text{C}\{^1\text{H}\}$  NMR (100 MHz,  $\text{CDCl}_3$ ):  $\delta$  = 200.7, 137.2, 132.9, 128.6, 128.1, 38.7, 31.8, 29.4, 29.2, 24.5, 22.7, 14.1.

### 1-phenyltridecan-1-one (33):<sup>25</sup>

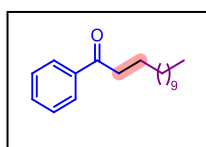

Purified by column chromatography using silica gel and ethyl acetate-hexane as eluent 73% (100.2 mg) isolated yield; white solid.  $^1\text{H NMR}$  (400 MHz,  $\text{CDCl}_3$ ):  $\delta$  = 7.95 – 7.93 (m, 2H), 7.56 – 7.50 (m, 1H), 7.44 (dd,  $J_{\text{H,H}}$  = 8.4, 7.0 Hz, 2H), 2.93 (d,  $J_{\text{H,H}}$  = 7.5 Hz, 2H), 1.73 – 1.69 (m, 2H), 1.24 (s, 18H), 0.85 (d,  $J_{\text{H,H}}$  = 7.1 Hz, 3H).  $^{13}\text{C}\{^1\text{H}\}$  NMR (100 MHz,  $\text{CDCl}_3$ ):  $\delta$  = 200.7, 137.2, 132.9, 128.6, 128.1, 38.7, 32.0, 29.7, 29.7, 29.6, 29.5, 29.4, 24.5, 22.8, 14.2.

### 1-cyclopropyl-3-phenylpropan-1-one (34):<sup>14</sup>

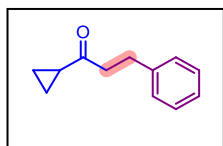

Purified by column chromatography using silica gel and ethyl acetate-hexane as eluent 79% (68.8 mg) isolated yield; white solid.  $^1\text{H NMR}$  (400 MHz,  $\text{CDCl}_3$ ):  $\delta = 7.28 - 7.22$  (m, 2H),  $7.20 - 7.13$  (m, 3H),  $2.88$  (h,  $J_{\text{H,H}} = 4.8, 4.3$  Hz, 4H),  $1.89$  (tt,  $J_{\text{H,H}} = 8.0, 4.4$  Hz, 1H),  $0.99$  (q,  $J_{\text{H,H}} = 3.5$  Hz, 2H),  $0.84$  (dt,  $J_{\text{H,H}} = 7.5, 3.4$  Hz, 2H).  $^{13}\text{C}\{^1\text{H}\}$  NMR (125 MHz,  $\text{CDCl}_3$ ):  $\delta = 210.0, 141.3, 128.5, 128.4, 126.1, 45.0, 30.0, 20.6, 10.8$ .

### Cyclohexanone (35):<sup>26</sup>

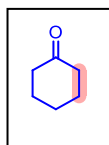

Purified by column chromatography using silica gel and ethyl acetate-hexane as eluent 85% (41.7 mg) isolated yield; colourless oil.  $^1\text{H NMR}$  (400 MHz,  $\text{CDCl}_3$ ):  $\delta = 2.28$  (t,  $J_{\text{H,H}} = 6.6$  Hz, 4H),  $1.81$  (m, 4H),  $1.66$  (t,  $J_{\text{H,H}} = 7.4, 4.2$  Hz, 2H).  $^{13}\text{C}\{^1\text{H}\}$  NMR (100 MHz,  $\text{CDCl}_3$ ):  $\delta = 212.3, 42.0, 27.0, 25.0$ .

### 1,5-diphenylpent-1-en-3-one (36):<sup>4</sup>

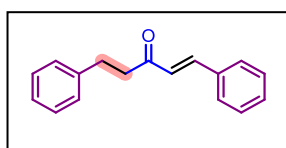

Purified by column chromatography using silica gel and ethyl acetate-hexane as eluent 80% (94.5 mg) isolated yield; white solid.  $^1\text{H NMR}$  (500 MHz,  $\text{CDCl}_3$ ):  $\delta = 7.56 - 7.50$  (m, 3H),  $7.41 - 7.35$  (m, 3H),  $7.30$  (t,  $J_{\text{H,H}} = 7.4$  Hz, 2H),  $7.26 - 7.18$  (m, 3H),  $6.73$  (d,  $J_{\text{H,H}} = 16.1$  Hz, 1H),  $3.00$  (s, 4H).  $^{13}\text{C}\{^1\text{H}\}$  NMR (125 MHz,  $\text{CDCl}_3$ ):  $\delta = 199.4, 142.8, 141.3, 130.6, 129.0, 128.6, 128.5, 128.3, 126.2, 42.5, 30.2$ .

### 1,5-diphenylpentan-3-one (37):<sup>27</sup>

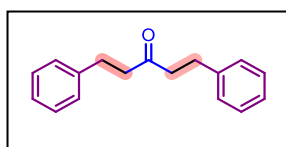

Purified by column chromatography using silica gel and ethyl acetate-hexane as eluent 77% (91.8 mg) isolated yield; white solid.  $^1\text{H NMR}$  (500 MHz,  $\text{CDCl}_3$ ):  $\delta = 7.28 - 7.24$  (m, 5H),  $7.17$  (dd,  $J_{\text{H,H}} = 21.0, 7.4$  Hz, 6H),  $2.88$  (t,  $J_{\text{H,H}} = 7.6$  Hz, 4H),  $2.70$  (t,  $J_{\text{H,H}} = 7.6$  Hz, 4H).  $^{13}\text{C}\{^1\text{H}\}$  NMR (125 MHz,  $\text{CDCl}_3$ ):  $\delta = 209.3, 141.1, 128.6, 128.4, 126.2, 44.6, 29.8$ .

### 1-phenylnonadec-10-en-1-one (38):<sup>28</sup>

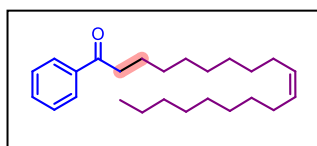

Purified by column chromatography using silica gel and ethyl acetate-hexane as eluent 76% (135.5 mg) isolated yield; white solid.  $^1\text{H NMR}$  (400 MHz,  $\text{CDCl}_3$ ):  $\delta = 7.93$  (s, 2H),  $7.53$  (s, 1H),  $7.43$  (s, 2H),  $5.34$  (dt,  $J_{\text{H,H}} = 14.6, 4.3$  Hz, 2H),  $2.94$  (s, 2H),  $1.95$  (m, 4H),  $1.72$  (q,  $J_{\text{H,H}} = 7.3$  Hz, 4H),  $1.24$  (s, 23H),  $0.86$  (s, 3H).  $^{13}\text{C}\{^1\text{H}\}$  NMR (100 MHz,  $\text{CDCl}_3$ ):  $\delta = 200.7, 137.2, 132.9, 130.5, 130.4, 128.6, 128.1, 38.7, 32.7, 32.0, 29.8, 29.7, 29.6, 29.5, 29.3, 29.2, 27.3, 24.5, 22.8, 14.2$ .

### 1-(2,4-dimethoxyphenyl)-3-(4-methoxyphenyl)propan-1-one (39):<sup>29</sup>

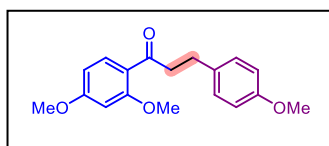

Purified by column chromatography using silica gel and ethyl acetate-hexane as eluent 78% (117.1 mg) isolated yield; white solid.  $^1\text{H NMR}$  (500 MHz,  $\text{CDCl}_3$ ):  $\delta = 7.79$  (d,  $J_{\text{H,H}} = 9.1$  Hz, 1H),  $7.13$  (d,  $J_{\text{H,H}} = 8.4$  Hz, 2H),  $6.81$  (d,  $J_{\text{H,H}} = 8.4$  Hz, 2H),  $6.51$  (dd,  $J_{\text{H,H}} = 8.8, 2.5$  Hz, 1H),  $6.43$  (d,  $J_{\text{H,H}} = 2.3$  Hz, 1H),  $3.85$  (s, 3H),  $3.83$  (s, 3H),  $3.77$  (s, 3H),  $3.23 - 3.20$  (m, 2H),  $2.93$  (d,  $J_{\text{H,H}} = 7.9$  Hz, 2H).  $^{13}\text{C}\{^1\text{H}\}$  NMR (125 MHz,  $\text{CDCl}_3$ ):  $\delta = 199.7, 164.4, 160.8, 157.9, 134.1, 132.8, 129.4, 121.2, 113.9, 105.2, 98.4, 55.6, 55.5, 55.3, 45.7, 29.8$ .

### 5,9-dimethyl-1-phenyldec-8-en-1-one (40):<sup>30</sup>

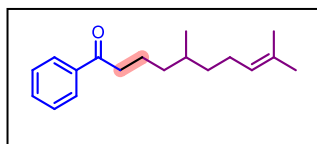

Purified by column chromatography using silica gel and ethyl acetate-hexane as eluent 75% (96.9 mg) isolated yield; white solid.  $^1\text{H NMR}$  (400 MHz,  $\text{CDCl}_3$ ):  $\delta$  = 7.94 (d,  $J_{\text{H,H}} = 7.6$  Hz, 2H), 7.53 (t,  $J_{\text{H,H}} = 7.4$  Hz, 1H), 7.44 (t,  $J_{\text{H,H}} = 7.6$  Hz, 2H), 5.08 (t,  $J_{\text{H,H}} = 7.4$  Hz, 1H), 2.93 (t,  $J_{\text{H,H}} = 7.4$  Hz, 2H), 1.94 (dt,  $J_{\text{H,H}} = 14.7, 6.8$  Hz, 2H), 1.76 – 1.68 (m, 2H), 1.66 (s, 3H), 1.58 (s, 3H), 1.44 – 1.32 (m, 3H), 1.18 (m, 2H), 0.88 (d,  $J_{\text{H,H}} = 6.2$  Hz, 3H).  $^{13}\text{C}\{^1\text{H}\}$  NMR (125 MHz,  $\text{CDCl}_3$ ):  $\delta$  = 200.7, 137.2, 132.9, 131.2, 128.6, 128.1, 125.0, 39.0, 37.0, 36.7, 32.4, 25.8, 25.6, 21.9, 19.5, 17.7.

#### Cholestan-3-one (41):<sup>31</sup>

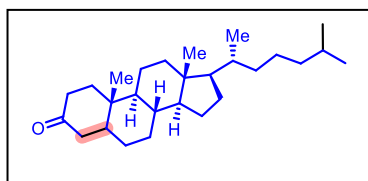

Purified by column chromatography using silica gel and ethyl acetate-hexane as eluent 72% (139.2 mg) isolated yield; white solid.  $^1\text{H NMR}$  (400 MHz,  $\text{CDCl}_3$ ):  $\delta$  = 2.73 (dt,  $J_{\text{H,H}} = 14.8, 3.5$  Hz, 1H), 2.48 – 2.28 (m, 2H), 2.12 – 1.92 (m, 3H), 1.87 – 1.79 (m, 2H), 1.76 (s, 3H), 1.68 – 1.46 (m, 7H), 1.44 – 1.21 (m, 7H), 1.15 (s, 4H), 1.11 – 1.03 (m, 4H), 1.01 – 0.92 (m, 3H), 0.89 (d,  $J_{\text{H,H}} = 6.3$  Hz, 3H), 0.86 – 0.84 (m, 5H), 0.70 (s, 2H).  $^{13}\text{C}\{^1\text{H}\}$  NMR (100 MHz,  $\text{CDCl}_3$ ):  $\delta$  = 215.0, 56.4, 56.3, 54.7, 54.2, 49.4, 44.8, 42.7, 40.8, 40.0, 39.6, 36.9, 36.2, 35.9, 34.9, 28.4, 28.4, 28.1, 24.3, 23.9, 22.9, 22.6, 21.5, 18.8, 15.0, 13.7, 12.2, 11.6.

#### Loureirin A (42):<sup>32</sup>

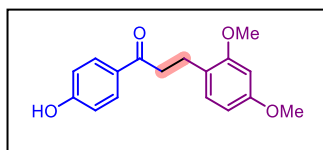

Purified by column chromatography using silica gel and ethyl acetate-hexane as eluent 76% (108.8 mg) isolated yield; white solid.  $^1\text{H NMR}$  (500 MHz,  $\text{CDCl}_3$ ):  $\delta$  = 7.90 (d,  $J_{\text{H,H}} = 8.5$  Hz, 2H), 7.06 (d,  $J_{\text{H,H}} = 8.2$  Hz, 1H), 6.88 (d,  $J_{\text{H,H}} = 8.5$  Hz, 2H), 6.44 – 6.38 (m, 2H), 3.78 (s, 6H), 3.17 (t,  $J_{\text{H,H}} = 7.7$  Hz, 2H), 2.97 – 2.93 (m, 2H).  $^{13}\text{C}\{^1\text{H}\}$  NMR (125 MHz,  $\text{CDCl}_3$ ):  $\delta$  = 200.0, 160.8, 159.5, 158.4, 130.9, 130.4, 121.9, 115.5, 103.9, 98.6, 55.5, 55.3, 39.0, 25.6.

#### Loureirin B (43):<sup>33</sup>

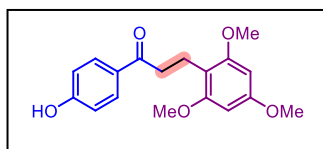

Purified by column chromatography using silica gel and ethyl acetate-hexane as eluent 70% (110.72 mg) isolated yield; white solid.  $^1\text{H NMR}$  (500 MHz,  $\text{CDCl}_3$ ):  $\delta$  = 7.89 (d,  $J_{\text{H,H}} = 8.6$  Hz, 2H), 6.87 (d,  $J_{\text{H,H}} = 8.8$  Hz, 2H), 6.74 (s, 1H), 6.50 (s, 1H), 3.85 (s, 3H), 3.79 (s, 3H), 3.79 (s, 3H), 3.18 – 3.15 (m, 2H), 2.97 – 2.94 (m, 2H).  $^{13}\text{C}\{^1\text{H}\}$  NMR (100 MHz,  $\text{CDCl}_3$ ):  $\delta$  = 199.6, 160.8, 151.7, 148.1, 142.8, 130.9, 129.8, 121.2, 115.4, 114.6, 97.9, 56.8, 56.3, 39.1, 25.7.

#### Davidigenin (44):<sup>34</sup>

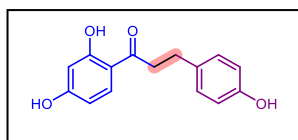

Purified by column chromatography using silica gel and ethyl acetate-hexane as eluent 61% (78.8 mg) isolated yield; white solid.  $^1\text{H NMR}$  (500 MHz,  $\text{CDCl}_3$ ):  $\delta$  = 12.65 (s, 1H), 7.77 (d,  $J_{\text{H,H}} = 9.0$  Hz, 1H), 7.06 – 7.03 (m, 2H), 6.67 (d,  $J_{\text{H,H}} = 8.4$  Hz, 2H), 6.36 (dd,  $J_{\text{H,H}} = 8.8, 2.6$  Hz, 1H), 6.26 (d,  $J_{\text{H,H}} = 2.3$  Hz, 1H), 3.19 (t,  $J_{\text{H,H}} = 7.6$  Hz, 2H), 2.81 (t,  $J_{\text{H,H}} = 7.6$  Hz, 2H).  $^{13}\text{C}\{^1\text{H}\}$  NMR (125 MHz,  $\text{CDCl}_3$ ):  $\delta$  = 203.9, 164.8, 164.4, 155.6, 133.0, 131.1, 129.3, 115.1, 112.6, 108.2, 102.5, 39.4, 29.1.

#### Menthone (45):<sup>35</sup>

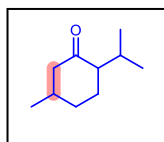

Purified by column chromatography using silica gel and ethyl acetate-hexane as eluent 81% (62.5 mg) isolated yield; white solid.  $^1\text{H NMR}$  (400 MHz,  $\text{CDCl}_3$ ):  $\delta$  = 2.34 – 2.27 (m, 1H), 2.15 – 1.80 (m, 6H), 1.38 – 1.25 (m, 2H), 0.97 (d,  $J_{\text{H,H}}$  = 6.7 Hz, 3H), 0.87 (d,  $J_{\text{H,H}}$  = 6.5 Hz, 3H), 0.81 (d,  $J_{\text{H,H}}$  = 6.6 Hz, 3H).  $^{13}\text{C}\{^1\text{H}\}$  NMR (125 MHz,  $\text{CDCl}_3$ ):  $\delta$  = 212.5, 55.9, 50.9, 35.5, 34.0, 27.9, 25.9, 22.3, 21.3, 18.7.

#### Rheosmin (46):<sup>36</sup>

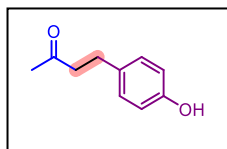

Purified by column chromatography using silica gel and ethyl acetate-hexane as eluent 76% (59.9 mg) isolated yield; white solid.  $^1\text{H NMR}$  (500 MHz,  $\text{CDCl}_3$ ):  $\delta$  = 7.03 (d,  $J_{\text{H,H}}$  = 8.3 Hz, 2H), 6.74 (d,  $J_{\text{H,H}}$  = 8.3 Hz, 2H), 2.82 (t,  $J_{\text{H,H}}$  = 7.5 Hz, 2H), 2.72 (t,  $J_{\text{H,H}}$  = 7.5 Hz, 2H), 2.13 (s, 3H).  $^{13}\text{C}\{^1\text{H}\}$  NMR (125 MHz,  $\text{CDCl}_3$ ):  $\delta$  = 209.3, 154.2, 132.9, 132.6, 129.5, 116.1, 115.5, 45.6, 30.3, 29.1.

#### Uvangoletin (47):<sup>37</sup>

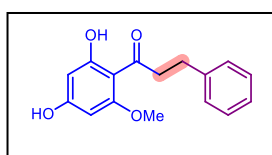

Purified by column chromatography using silica gel and ethyl acetate-hexane as eluent 65% (88.5 mg) isolated yield; white solid.  $^1\text{H NMR}$  (500 MHz,  $\text{CDCl}_3$ ):  $\delta$  = 7.03 (d,  $J_{\text{H,H}}$  = 8.3 Hz, 2H), 6.74 (d,  $J_{\text{H,H}}$  = 8.3 Hz, 2H), 2.82 (t,  $J_{\text{H,H}}$  = 7.5 Hz, 2H), 2.72 (t,  $J_{\text{H,H}}$  = 7.5 Hz, 2H), 2.13 (s, 3H).  $^{13}\text{C}\{^1\text{H}\}$  NMR (125 MHz,  $\text{CDCl}_3$ ):  $\delta$  = 206.5, 164.8, 161.4, 141.6, 136.0, 128.5, 126.1, 111.2, 111.0, 101.3, 55.8, 46.6, 30.5.

#### Donepezil (48):<sup>38</sup>

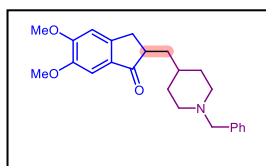

Purified by column chromatography using silica gel and ethyl acetate-hexane as eluent 88% (167 mg) isolated yield; white solid.  $^1\text{H NMR}$  (500 MHz,  $\text{CDCl}_3$ ):  $\delta$  = 7.29 (d,  $J_{\text{H,H}}$  = 4.5 Hz, 4H), 7.23 (d,  $J_{\text{H,H}}$  = 9.2 Hz, 1H), 7.14 (s, 1H), 6.83 (s, 1H), 3.93 (s, 3H), 3.88 (s, 3H), 3.50 (s, 2H), 3.23 – 3.19 (m, 1H), 2.91 – 2.88 (m, 2H), 2.67 (dd,  $J_{\text{H,H}}$  = 14.3, 3.7 Hz, 2H), 1.99 – 1.89 (m, 3H), 1.71 – 1.64 (m, 2H), 1.51 – 1.45 (m, 1H), 1.36 – 1.29 (m, 3H).  $^{13}\text{C}\{^1\text{H}\}$  NMR (125 MHz,  $\text{CDCl}_3$ ):  $\delta$  = 207.8, 155.5, 149.5, 148.8, 138.2, 129.4, 129.3, 128.2, 127.1, 107.4, 104.5, 63.4, 45.5, 38.7, 34.4, 33.4, 32.9, 31.8, 31.3.

#### 1,3-diphenylpropan-1-ol (2a):<sup>39</sup>

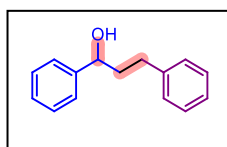

Purified by column chromatography using silica gel and ethyl acetate-hexane as eluent 85% (90.2 mg) isolated yield; colourless oil.  $^1\text{H NMR}$  (400 MHz,  $\text{CDCl}_3$ ):  $\delta$  = 7.35 (d,  $J_{\text{H,H}}$  = 3.8 Hz, 4H), 7.31-7.25 (m, 3H), 7.23-7.16 (m, 3H), 4.68 (dd,  $J_{\text{H,H}}$  = 7.9, 5.5 Hz, 1H), 2.77-2.64 (m, 2H), 2.18-2.00 (m, 3H).  $^{13}\text{C}\{^1\text{H}\}$  NMR (100 MHz,  $\text{CDCl}_3$ ):  $\delta$  = 144.6, 141.8, 128.6, 128.5, 128.4, 127.7, 126.0, 125.9, 73.9, 40.5, 32.1.

#### 1-(4-methoxyphenyl)-3-phenylpropan-1-ol (49):<sup>39</sup>

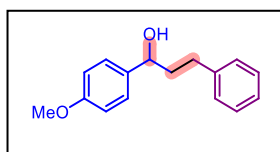

Purified by column chromatography using silica gel and ethyl acetate-hexane as eluent 80% (96.9 mg) isolated yield; colourless oil.  $^1\text{H NMR}$  (400 MHz,  $\text{CDCl}_3$ ):  $\delta$  = 7.27 (dd,  $J_{\text{H,H}}$  = 8.2, 6.4 Hz, 4H), 7.20 – 7.12 (m, 3H), 6.88 (d,  $J_{\text{H,H}}$  = 8.6 Hz, 2H), 4.62 (dd,  $J_{\text{H,H}}$  = 7.7, 5.7 Hz, 1H), 3.80 (s, 3H), 2.75 – 2.61 (m, 2H), 2.18 – 1.90 (m, 3H).  $^{13}\text{C}\{^1\text{H}\}$  NMR (125 MHz,  $\text{CDCl}_3$ ):  $\delta$  = 159.1, 141.9, 136.8, 128.5, 128.4, 127.3, 125.9, 113.9, 73.5, 55.3, 40.4, 32.1.

#### 3-phenyl-1-(4-(trifluoromethyl)phenyl)propan-1-ol (50):<sup>40</sup>



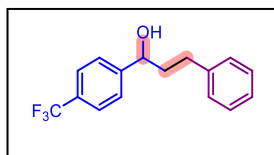

Purified by column chromatography using silica gel and ethyl acetate-hexane as eluent 87% (121.9 mg) isolated yield; colourless oil.  $^1\text{H NMR}$  (500 MHz,  $\text{CDCl}_3$ ):  $\delta$  = 7.60 (d,  $J_{\text{H,H}}$  = 8.1 Hz, 2H), 7.44 (d,  $J_{\text{H,H}}$  = 7.8 Hz, 2H), 7.29 (t,  $J_{\text{H,H}}$  = 7.5 Hz, 2H), 7.20 (t,  $J_{\text{H,H}}$  = 9.1 Hz, 3H), 4.73 (dd,  $J_{\text{H,H}}$  = 8.0, 5.0 Hz, 1H), 2.77 – 2.66 (m, 2H), 2.15 – 2.00 (m, 3H).  $^{13}\text{C}\{^1\text{H}\}$  NMR (125 MHz,  $\text{CDCl}_3$ ):  $\delta$  = 148.6, 141.4, 130.0, 129.7, 128.6, 128.5, 126.2, 126.1, 125.5, 73.2, 40.6, 31.9.

### 3-phenyl-1-(pyridin-3-yl)propan-1-ol (51):<sup>41</sup>

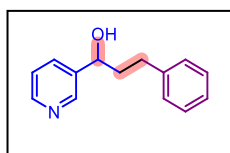

Purified by column chromatography using silica gel and ethyl acetate-hexane as eluent 81% (81.1 mg) isolated yield; colourless oil.  $^1\text{H NMR}$  (400 MHz,  $\text{CDCl}_3$ ):  $\delta$  = 8.36 – 8.31 (m, 2H), 7.67 (d,  $J_{\text{H,H}}$  = 7.6 Hz, 1H), 7.24 – 7.12 (m, 7H), 4.66 (d,  $J_{\text{H,H}}$  = 5.3 Hz, 1H), 2.69 (m, 2H), 2.15 – 1.90 (m, 3H).  $^{13}\text{C}\{^1\text{H}\}$  NMR (100 MHz,  $\text{CDCl}_3$ ):  $\delta$  = 148.3, 147.5, 141.5, 140.7, 134.0, 128.5, 128.4, 126.0, 123.6, 70.9, 40.5, 31.9.

### 3-(4-nitrophenyl)-1-phenylpropan-1-ol (52):<sup>42</sup>

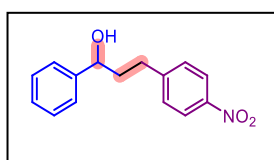

Purified by column chromatography using silica gel and ethyl acetate-hexane as eluent 85% (103.8 mg) isolated yield; colourless oil.  $^1\text{H NMR}$  (500 MHz,  $\text{CDCl}_3$ ):  $\delta$  = 8.12 (d,  $J_{\text{H,H}}$  = 8.5 Hz, 2H), 7.37 – 7.28 (m, 7H), 2.86 (m, 1H), 2.77 (m, 1H), 2.17 – 2.09 (m, 1H), 2.06 – 1.98 (m, 1H), 1.88 (s, 1H).  $^{13}\text{C}\{^1\text{H}\}$  NMR (125 MHz,  $\text{CDCl}_3$ ):  $\delta$  = 129.3, 128.8, 128.0, 125.9, 123.8, 73.7, 39.9, 32.1.

### 3-(6-methoxynaphthalen-2-yl)-1-phenylpropan-1-ol (53):

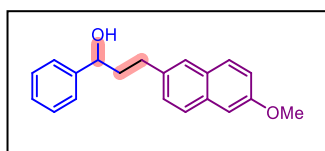

Purified by column chromatography using silica gel and ethyl acetate-hexane as eluent 80% (101.3 mg) isolated yield; colourless oil.  $^1\text{H NMR}$  (500 MHz,  $\text{CDCl}_3$ ):  $\delta$  = 7.65 (dd,  $J_{\text{H,H}}$  = 8.4, 2.4 Hz, 2H), 7.55 (s, 1H), 7.35 (d,  $J_{\text{H,H}}$  = 4.2 Hz, 4H), 7.31 – 7.25 (m, 2H), 7.14 – 7.09 (m, 2H), 4.70 (t,  $J_{\text{H,H}}$  = 6.7 Hz, 1H), 3.90 (s, 3H), 2.90 – 2.77 (m, 2H), 2.24 – 2.17 (m, 1H), 2.14 – 2.05 (m, 1H), 1.93 (d,  $J_{\text{H,H}}$  = 3.1 Hz, 1H).  $^{13}\text{C}\{^1\text{H}\}$  NMR (100 MHz,  $\text{CDCl}_3$ ):  $\delta$  = 157.2, 144.7, 137.0, 133.1, 129.2, 129.0, 128.6, 127.9, 127.7, 126.9, 126.4, 126.0, 118.8, 105.7, 55.4, 40.5, 32.0. **ESI-MS**: Calcd for  $\text{C}_{20}\text{H}_{21}\text{O}_2^+$ ,  $[\text{M}+\text{H}]^+$ , 293.1542; found, 293.1548.

### 3-(4-methoxyphenyl)-1-(p-tolyl)propan-1-ol (54):<sup>43</sup>

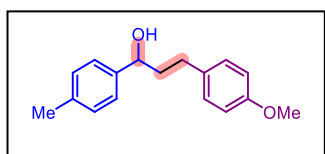

Purified by column chromatography using silica gel and ethyl acetate-hexane as eluent 79% (101.3 mg) isolated yield; colourless oil.  $^1\text{H NMR}$  (500 MHz,  $\text{CDCl}_3$ ):  $\delta$  = 7.23 (d,  $J_{\text{H,H}}$  = 7.7 Hz, 2H), 7.16 (d,  $J_{\text{H,H}}$  = 7.8 Hz, 2H), 7.11 (d,  $J_{\text{H,H}}$  = 8.6 Hz, 2H), 6.83 (d,  $J_{\text{H,H}}$  = 9.0 Hz, 2H), 4.62 (dd,  $J_{\text{H,H}}$  = 7.7, 5.4 Hz, 1H), 3.78 (s, 3H), 2.71 – 2.58 (m, 2H), 2.36 (s, 3H), 2.12 – 1.95 (m, 3H).  $^{13}\text{C}\{^1\text{H}\}$  NMR (125 MHz,  $\text{CDCl}_3$ ):  $\delta$  = 157.8, 137.2, 133.9, 129.3, 129.2, 125.9, 113.8, 73.7, 31.2, 21.1.

### 1-mesityl-3-phenylpropan-1-ol (55):<sup>44</sup>

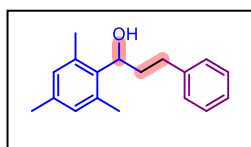

Purified by column chromatography using silica gel and ethyl acetate-hexane as eluent 77% (97.9 mg) isolated yield; colourless oil.  $^1\text{H NMR}$  (500 MHz,  $\text{CDCl}_3$ ):  $\delta = 7.31 - 7.25$  (m, 2H),  $7.23 - 7.15$  (m, 3H),  $6.80$  (s, 2H),  $5.11$  (dd,  $J_{\text{H,H}} = 9.3, 4.7$  Hz, 1H),  $2.88$  (m, 1H),  $2.67$  (m, 1H),  $2.39 - 2.34$  (m, 1H),  $2.32$  (s, 6H),  $2.23$  (s, 3H),  $1.96$  (m, 1H),  $1.71$  (s, 1H).  $^{13}\text{C}\{^1\text{H}\}$  NMR (125 MHz,  $\text{CDCl}_3$ ):  $\delta = 141.9, 136.9, 136.1, 130.2, 128.6, 128.4, 125.9, 70.7, 37.1, 32.8, 20.8, 20.7$ .

### 1-phenyltridecan-1-ol (56):<sup>45</sup>

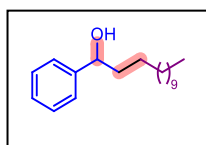

Purified by column chromatography using silica gel and ethyl acetate-hexane as eluent 75% (61.6 mg) isolated yield; colourless oil.  $^1\text{H NMR}$  (500 MHz,  $\text{CDCl}_3$ ):  $\delta = 7.33$  (d,  $J_{\text{H,H}} = 4.6$  Hz, 4H),  $7.30 - 7.24$  (m, 1H),  $4.68 - 4.62$  (m, 1H),  $1.74$  (m, 2H),  $1.40$  (dd,  $J_{\text{H,H}} = 13.0, 6.8$  Hz, 1H),  $1.24$  (s, 20H),  $0.87$  (t,  $J_{\text{H,H}} = 6.8$  Hz, 3H).  $^{13}\text{C}\{^1\text{H}\}$  NMR (125 MHz,  $\text{CDCl}_3$ ):  $\delta = 145.0, 128.5, 127.6, 126.0, 74.8, 39.2, 32.0, 29.7, 29.6, 29.4, 25.9, 22.8, 14.2$ .

### Cyclohexanol (57):<sup>46</sup>

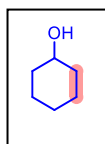

Purified by column chromatography using silica gel and ethyl acetate-hexane as eluent 86% (43.1 mg) isolated yield; colourless oil.  $^1\text{H NMR}$  (400 MHz,  $\text{CDCl}_3$ ):  $\delta = 3.55$  (hept,  $J_{\text{H,H}} = 4.1$  Hz, 1H),  $1.85$  (td,  $J_{\text{H,H}} = 11.4, 10.9, 6.2$  Hz, 3H),  $1.69$  (dd,  $J_{\text{H,H}} = 8.9, 4.5$  Hz, 2H),  $1.53 - 1.47$  (m, 1H),  $1.25 - 1.11$  (m, 5H).  $^{13}\text{C}\{^1\text{H}\}$  NMR (100 MHz,  $\text{CDCl}_3$ ):  $\delta = 70.3, 35.5, 25.5, 24.2$ .

### 3,3'-(1,3-phenylene)bis(1-(4-(trifluoromethyl)phenyl)propan-1-ol) (58):

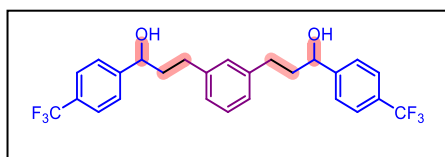

Purified by column chromatography using silica gel and ethyl acetate-hexane as eluent 86% (184.3 mg) isolated yield; colourless oil.  $^1\text{H NMR}$  (500 MHz,  $\text{CDCl}_3$ ):  $\delta = 3.55$  (m, 1H),  $1.85$  (td,  $J_{\text{H,H}} = 11.4, 10.9, 6.2$  Hz, 3H),  $1.69$  (dd,  $J_{\text{H,H}} = 8.9, 4.5$  Hz, 2H),  $1.53 - 1.47$  (m, 1H),  $1.25 - 1.11$  (m, 5H).  $^{13}\text{C}\{^1\text{H}\}$  NMR (125 MHz,  $\text{CDCl}_3$ ):  $\delta = 146.0, 144.4, 128.8, 128.7, 127.9, 125.9, 125.4, 73.8, 40.1, 31.9$ . **ESI-MS**: Calcd for  $\text{C}_{26}\text{H}_{25}\text{F}_6\text{O}_2^+$ ,  $[\text{M}+\text{H}]^+$ , 483.1759; found, 483.1759.

### Dibenzylamine (59):<sup>47</sup>

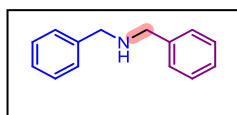

Purified by column chromatography using alumina and ethyl acetate-hexane as eluent 90% (88.8 mg) isolated yield; colourless oil.  $^1\text{H NMR}$  (500 MHz,  $\text{CDCl}_3$ ):  $\delta = 7.36 - 7.30$  (m, 8H),  $7.27 - 7.23$  (m, 2H),  $3.81$  (s, 4H).  $^{13}\text{C}\{^1\text{H}\}$  NMR (125 MHz,  $\text{CDCl}_3$ ):  $\delta = 140.4, 128.5, 128.2, 127.0, 53.2$ .

### N-benzyl-1-(4-methoxyphenyl)methanamine (60):<sup>48</sup>

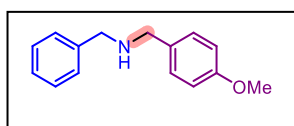

Purified by column chromatography using alumina and ethyl acetate-hexane as eluent 82% (87.9 mg) isolated yield; colourless oil.  $^1\text{H NMR}$  (500 MHz,  $\text{D}_2\text{O}$ ):  $\delta = 7.38$  (t,  $J_{\text{H,H}} = 3.4$  Hz, 3H),  $7.34$  (d,  $J_{\text{H,H}} = 2.4$  Hz, 2H),  $7.29$  (d,  $J_{\text{H,H}} = 8.9$  Hz, 2H),  $6.94$  (d,  $J_{\text{H,H}} = 8.8$  Hz, 2H),  $4.11$  (s, 2H),  $4.08$  (s, 2H),  $3.73$  (s, 3H).  $^{13}\text{C}\{^1\text{H}\}$  NMR (125 MHz,  $\text{D}_2\text{O}$ ):  $\delta = 159.8, 131.6, 130.8, 129.9, 129.7, 129.3, 123.1, 114.7, 55.5, 50.3, 50.0$ .

### bis(4-methoxybenzyl)amine (61):<sup>49</sup>

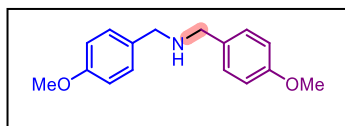

Purified by column chromatography using alumina and ethyl acetate-hexane as eluent 76% (87.5 mg) isolated yield; colourless oil.  $^1\text{H NMR}$  (500 MHz,  $\text{CDCl}_3$ ):  $\delta = 7.25$  (d,  $J_{\text{H,H}} = 8.3$  Hz, 4H), 6.87 (d,  $J_{\text{H,H}} = 8.3$  Hz, 4H), 3.78 (s, 6H), 3.72 (s, 4H).  $^{13}\text{C}\{^1\text{H}\}$  NMR (125 MHz,  $\text{CDCl}_3$ ):  $\delta = 158.6, 132.4, 129.3, 129.3, 113.7, 113.7, 55.2, 55.1, 52.4$ .

#### N-benzyl-1-(4-(trifluoromethyl)phenyl)methanamine (62):<sup>50</sup>

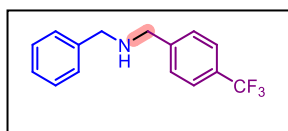

Purified by column chromatography using alumina and ethyl acetate-hexane as eluent 91% (120.7 mg) isolated yield; colourless oil.  $^1\text{H NMR}$  (500 MHz,  $\text{CDCl}_3$ ):  $\delta = 7.59$  (d,  $J_{\text{H,H}} = 7.9$  Hz, 2H), 7.47 (d,  $J_{\text{H,H}} = 8.1$  Hz, 2H), 7.34 (d,  $J_{\text{H,H}} = 4.4$  Hz, 4H), 7.30 – 7.24 (m, 1H), 3.86 (s, 2H), 3.81 (s, 2H).  $^{13}\text{C}\{^1\text{H}\}$  NMR (125 MHz,  $\text{CDCl}_3$ ):  $\delta = 144.6, 140.1, 128.6, 128.4, 128.3, 127.2, 127.2, 125.5, 125.4, 53.3, 52.7$ .

#### N-benzyl-1-(2-chlorophenyl)methanamine (63):<sup>51</sup>

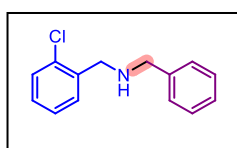

Purified by column chromatography using alumina and ethyl acetate-hexane as eluent 83% (96.2 mg) isolated yield; colourless oil.  $^1\text{H NMR}$  (500 MHz,  $\text{CDCl}_3$ ):  $\delta = 7.43 - 7.34$  (m, 6H), 7.30 – 7.18 (m, 3H), 3.92 (s, 2H), 3.82 (s, 2H).  $^{13}\text{C}\{^1\text{H}\}$  NMR (100 MHz,  $\text{CDCl}_3$ ):  $\delta = 140.1, 137.6, 133.8, 130.2, 129.5, 128.4, 128.3, 128.2, 127.0, 127.0, 126.8, 53.2, 53.1, 50.8$ .

#### bis(thiophen-2-ylmethyl)amine (64):<sup>52</sup>

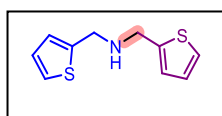

Purified by column chromatography using alumina and ethyl acetate-hexane as eluent 87% (91 mg) isolated yield; colourless oil.  $^1\text{H NMR}$  (500 MHz,  $\text{CDCl}_3$ ):  $\delta = 7.22$  (d,  $J_{\text{H,H}} = 5.3$  Hz, 2H), 6.95 (d,  $J_{\text{H,H}} = 5.1$  Hz, 2H), 6.93 (d,  $J_{\text{H,H}} = 3.3$  Hz, 2H), 4.02 (s, 4H).  $^{13}\text{C}\{^1\text{H}\}$  NMR (125 MHz,  $\text{CDCl}_3$ ):  $\delta = 143.7, 126.7, 125.2, 124.6, 47.1$ .

#### N-benzyl-1-(pyridin-3-yl)methanamine (65):<sup>53</sup>

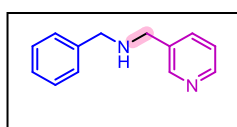

Purified by column chromatography using alumina and ethyl acetate-hexane as eluent 80% (79.3 mg) isolated yield; colourless oil.  $^1\text{H NMR}$  (500 MHz,  $\text{CDCl}_3$ ):  $\delta = 8.52$  (d,  $J_{\text{H,H}} = 2.2$  Hz, 1H), 8.45 (dd,  $J_{\text{H,H}} = 5.2, 1.6$  Hz, 1H), 7.67 – 7.64 (m, 1H), 7.29 (s, 5H), 7.23 – 7.19 (m, 2H), 3.75 (s, 4H).  $^{13}\text{C}\{^1\text{H}\}$  NMR (100 MHz,  $\text{CDCl}_3$ ):  $\delta = 149.6, 148.3, 139.8, 135.8, 128.4, 128.0, 127.0, 123.3, 53.1, 50.3$ .

#### N-benzyl-2-(1H-indol-3-yl)ethan-1-amine (66):<sup>54</sup>

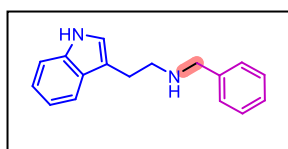

Purified by column chromatography using alumina and ethyl acetate-hexane as eluent 74% (92.6 mg) isolated yield; colourless oil.  $^1\text{H NMR}$  (500 MHz,  $\text{CDCl}_3$ ):  $\delta = 8.31$  (s, 1H), 7.63 (d,  $J_{\text{H,H}} = 7.8$  Hz, 1H), 7.34 – 7.28 (m, 5H), 7.27 – 7.24 (m, 1H), 7.21 (t,  $J_{\text{H,H}} = 7.6$  Hz, 1H), 7.13 (t,  $J_{\text{H,H}} = 7.5$  Hz, 1H), 6.97 (d,  $J_{\text{H,H}} = 2.8$  Hz, 1H), 3.84 (s, 2H), 3.03 (s, 4H).  $^{13}\text{C}\{^1\text{H}\}$  NMR (125 MHz,  $\text{CDCl}_3$ ):  $\delta = 140.3, 136.6, 128.8, 128.6, 128.5, 128.3, 127.1, 122.2, 122.1, 119.3, 119.0, 113.8, 111.3, 54.0, 49.5, 25.9$ .

#### N-benzyl-1-(naphthalen-1-yl)methanamine (67):<sup>55</sup>

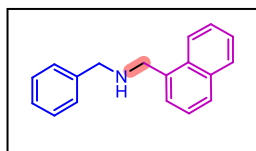

Purified by column chromatography using alumina and ethyl acetate-hexane as eluent 83% (102.6 mg) isolated yield; colourless oil.  $^1\text{H NMR}$  (500 MHz,  $\text{CDCl}_3$ ):  $\delta$  = 8.21 (d,  $J_{\text{H,H}} = 8.2$  Hz, 1H), 7.96 (d,  $J_{\text{H,H}} = 7.9$  Hz, 1H), 7.88 (d,  $J_{\text{H,H}} = 8.2$  Hz, 1H), 7.64 – 7.56 (m, 3H), 7.50 (m, 5H), 7.39 (t,  $J_{\text{H,H}} = 7.3$  Hz, 1H), 4.33 (s, 2H), 4.00 (s, 2H).  $^{13}\text{C}\{^1\text{H}\}$  NMR (100 MHz,  $\text{CDCl}_3$ ):  $\delta$  = 140.3, 135.9, 133.9, 131.8, 128.6, 128.4, 128.2, 127.7, 127.0, 126.0, 126.0, 125.6, 125.3, 123.8, 53.7, 50.8.

#### 2-(benzylamino)ethan-1-ol (68):<sup>56</sup>

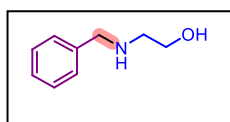

Purified by column chromatography using alumina and ethyl acetate-hexane as eluent 71% (53.7 mg) isolated yield; colourless oil.  $^1\text{H NMR}$  (500 MHz,  $\text{CDCl}_3$ ):  $\delta$  = 8.21 (d,  $J_{\text{H,H}} = 8.2$  Hz, 1H), 7.96 (d,  $J_{\text{H,H}} = 7.9$  Hz, 1H), 7.88 (d,  $J_{\text{H,H}} = 8.2$  Hz, 1H), 7.64 – 7.56 (m, 3H), 7.50 (m, 5H), 7.39 (t,  $J_{\text{H,H}} = 7.3$  Hz, 1H), 4.33 (s, 2H), 4.00 (s, 2H).  $^{13}\text{C}\{^1\text{H}\}$  NMR (125 MHz,  $\text{CDCl}_3$ ):  $\delta$  = 139.7, 128.5, 128.2, 127.1, 60.7, 53.5, 50.7.

#### N-benzylcyclohexanamine (69):<sup>50</sup>

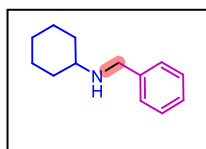

Purified by column chromatography using alumina and ethyl acetate-hexane as eluent 78% (73.8 mg) isolated yield; colourless oil.  $^1\text{H NMR}$  (500 MHz,  $\text{CDCl}_3$ ):  $\delta$  = 7.33 – 7.21 (m, 5H), 3.80 (s, 2H), 2.49 (td,  $J_{\text{H,H}} = 10.1, 5.0$  Hz, 1H), 1.91 (d,  $J_{\text{H,H}} = 12.0$  Hz, 2H), 1.76 – 1.70 (m, 2H), 1.60 (d,  $J_{\text{H,H}} = 11.4$  Hz, 2H), 1.24 (d,  $J_{\text{H,H}} = 10.7$  Hz, 2H), 1.13 (t,  $J_{\text{H,H}} = 11.0$  Hz, 2H).  $^{13}\text{C}\{^1\text{H}\}$  NMR (125 MHz,  $\text{CDCl}_3$ ):  $\delta$  = 128.5, 128.2, 126.9, 56.3, 51.1, 33.6, 26.3, 25.1.

#### N-benzyl-1-phenylethan-1-amine (70):<sup>50</sup>

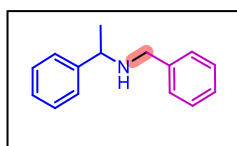

Purified by column chromatography using alumina and ethyl acetate-hexane as eluent 80% (84.5 mg) isolated yield; colourless oil.  $^1\text{H NMR}$  (500 MHz,  $\text{CDCl}_3$ ):  $\delta$  = 7.36 – 7.21 (m, 10H), 3.81 (q,  $J_{\text{H,H}} = 6.5$  Hz, 1H), 3.67 – 3.57 (m, 2H), 1.36 (d,  $J_{\text{H,H}} = 6.8$  Hz, 3H).  $^{13}\text{C}\{^1\text{H}\}$  NMR (125 MHz,  $\text{CDCl}_3$ ):  $\delta$  = 145.6, 140.6, 128.5, 128.4, 128.2, 127.0, 126.9, 126.7, 57.5, 51.7, 24.5.

#### 1,1'-(1,3-phenylene)bis(N-benzylmethanamine) (71):

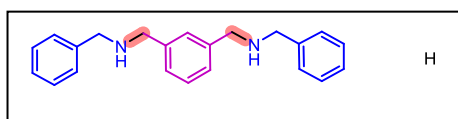

Purified by column chromatography using alumina and ethyl acetate-hexane as eluent 88% (139.2 mg) isolated yield; colourless oil.  $^1\text{H NMR}$  (500 MHz,  $\text{CDCl}_3$ ):  $\delta$  = 7.36 – 7.21 (m, 10H), 3.81 (q,  $J_{\text{H,H}} = 6.5$  Hz, 1H), 3.67 – 3.57 (m, 2H), 1.36 (d,  $J_{\text{H,H}} = 6.8$  Hz, 3H).  $^{13}\text{C}\{^1\text{H}\}$  NMR (125 MHz,  $\text{CDCl}_3$ ):  $\delta$  = 140.5, 140.4, 128.5, 128.5, 128.2, 128.0, 127.0, 126.9, 53.3, 53.2. **ESI-MS:** Calcd for  $\text{C}_{22}\text{H}_{25}\text{N}_2^+$ ,  $[\text{M}+\text{H}]^+$ , 317.2018; found, 317.2016.

## 10. Copies of $^1\text{H}$ and $^{13}\text{C}\{^1\text{H}\}$ NMR Spectra of Products

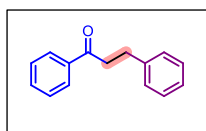

$^1\text{H NMR}$  ( $\text{CDCl}_3$ , 400 MHz)

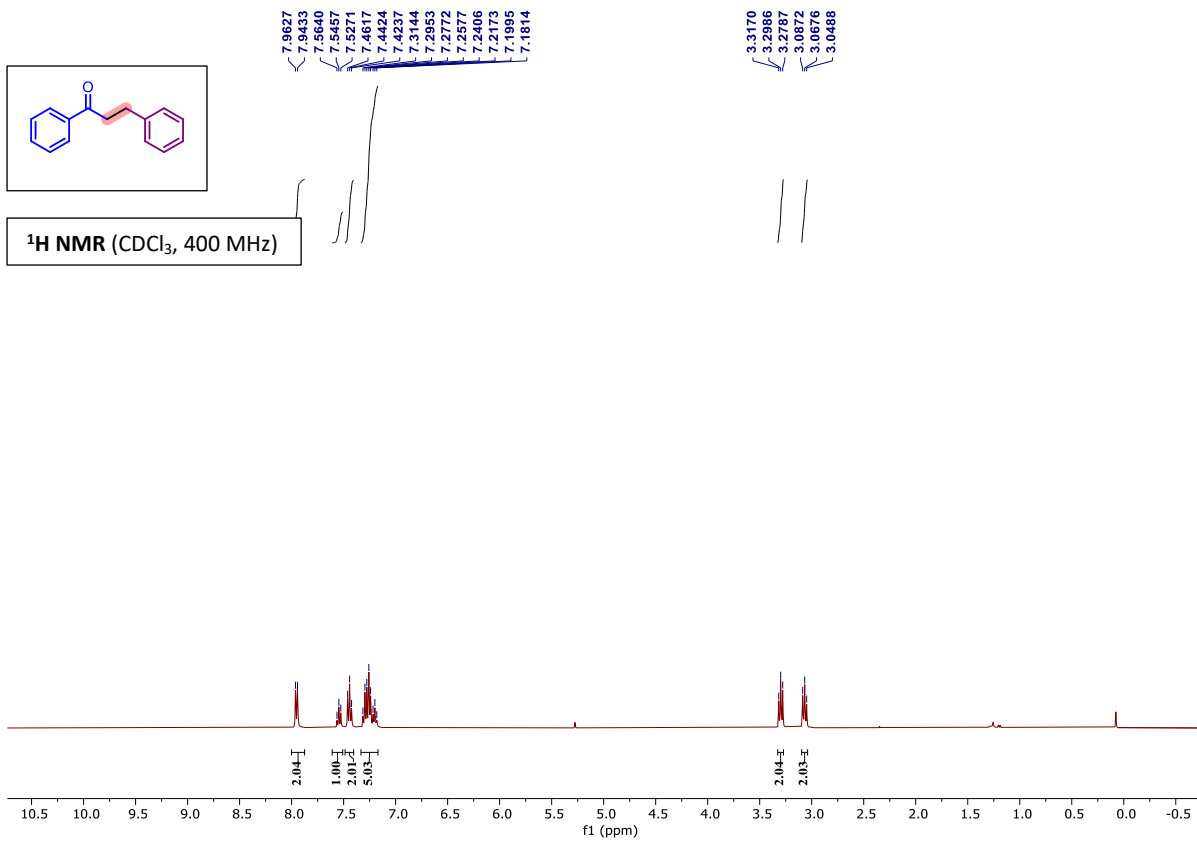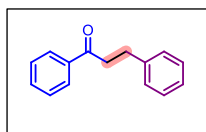

$^{13}\text{C}\{^1\text{H}\}$  NMR ( $\text{CDCl}_3$ , 125 MHz)

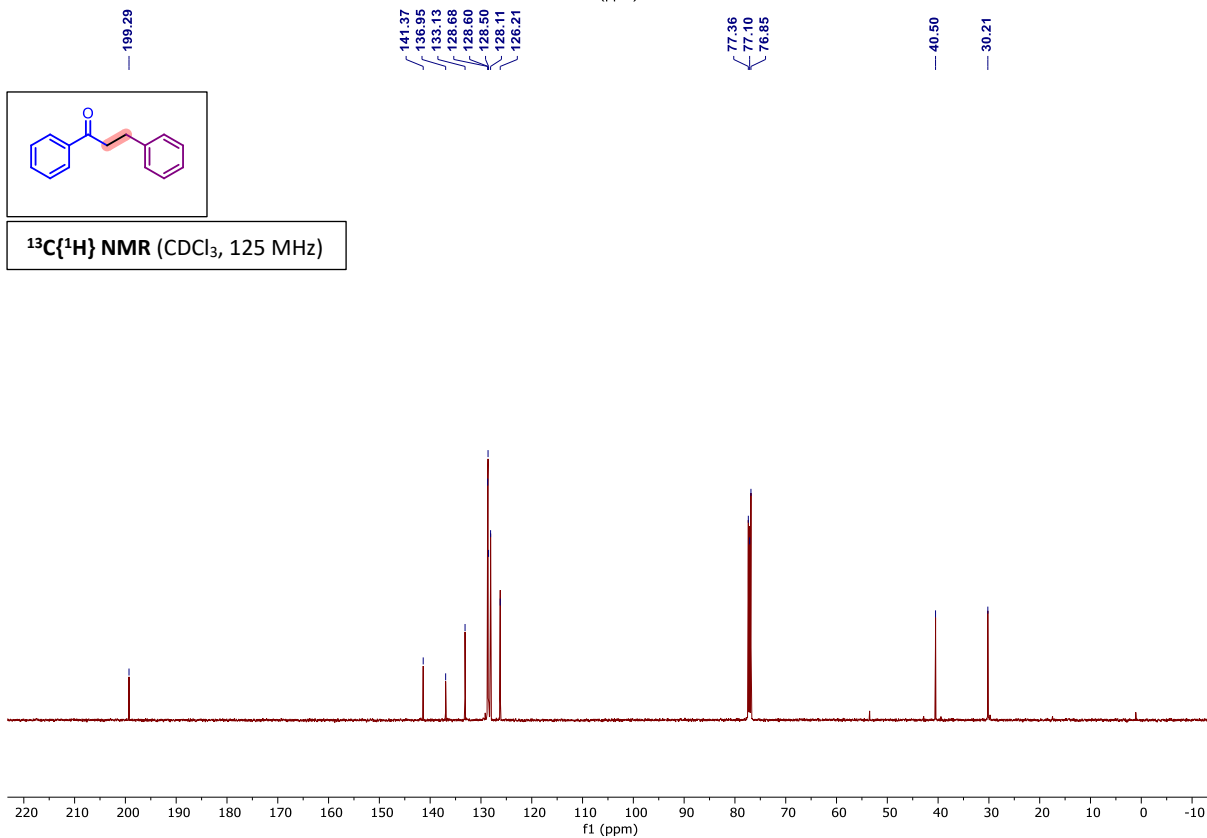

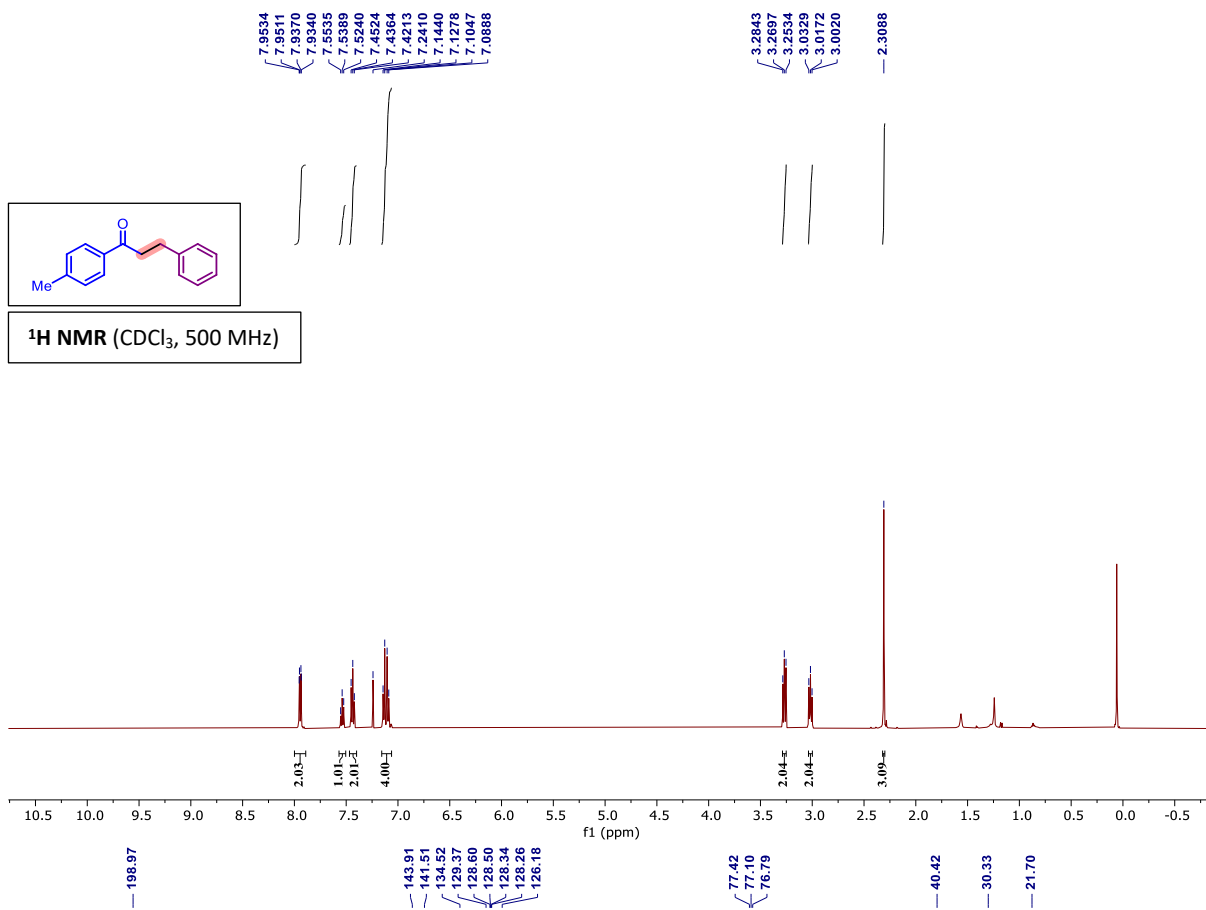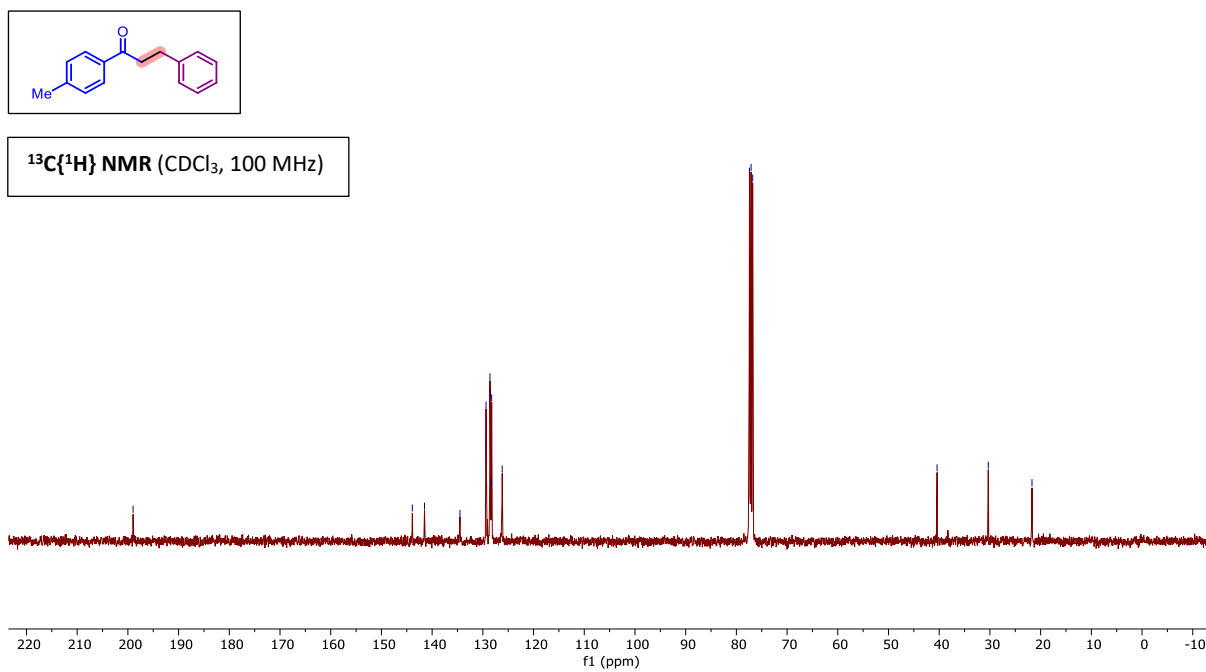

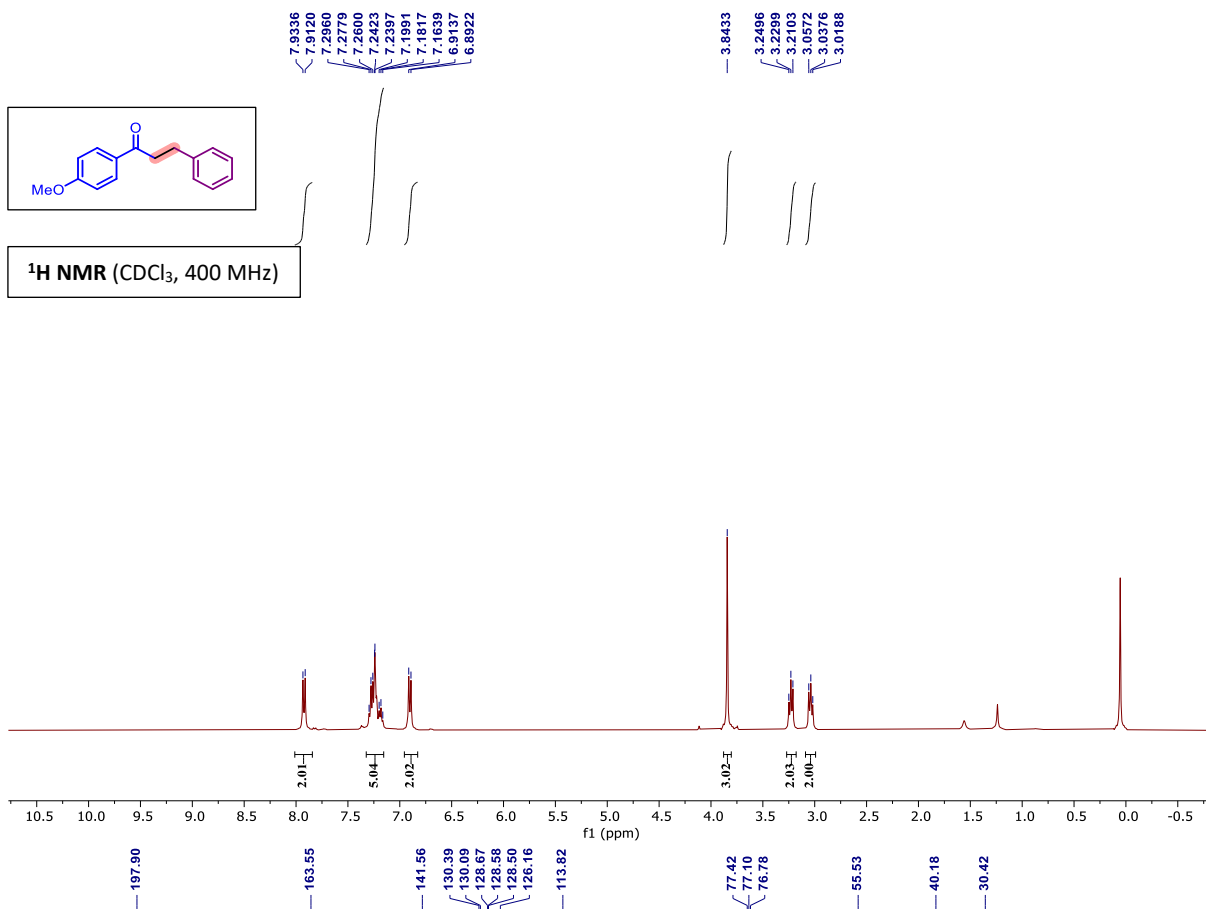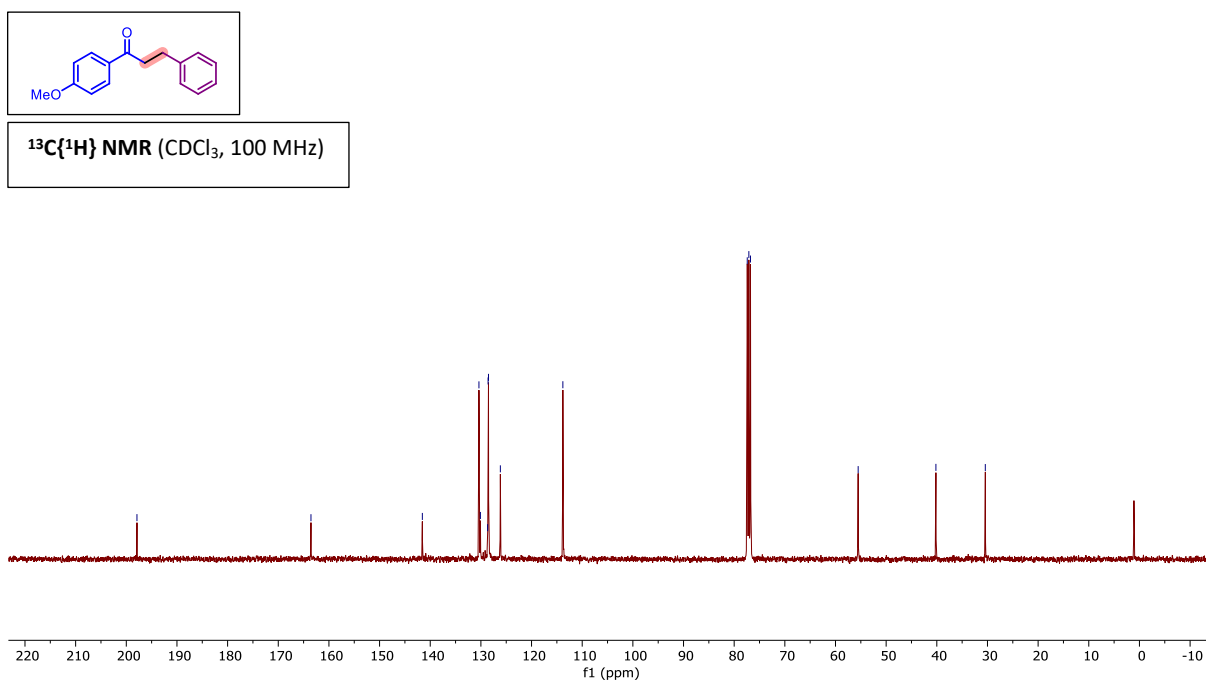

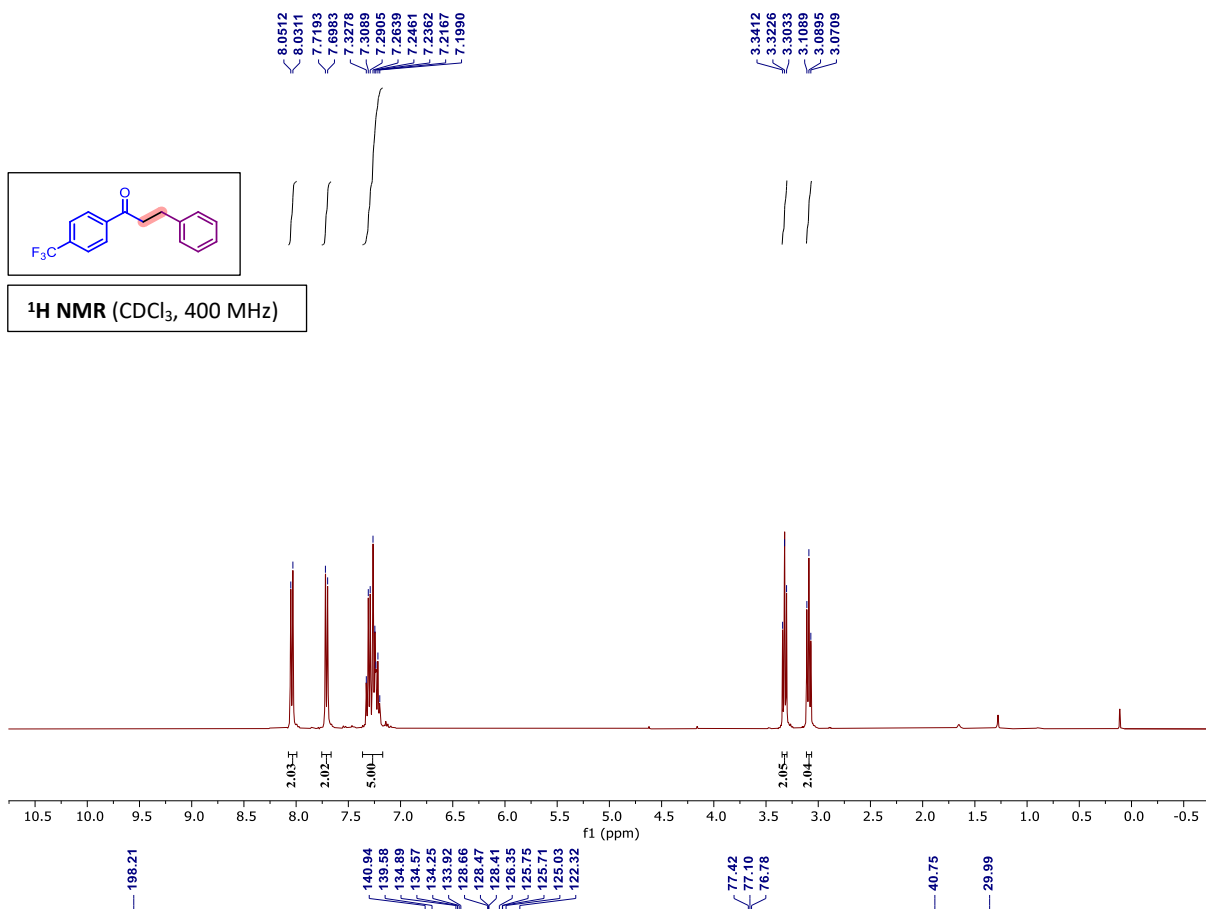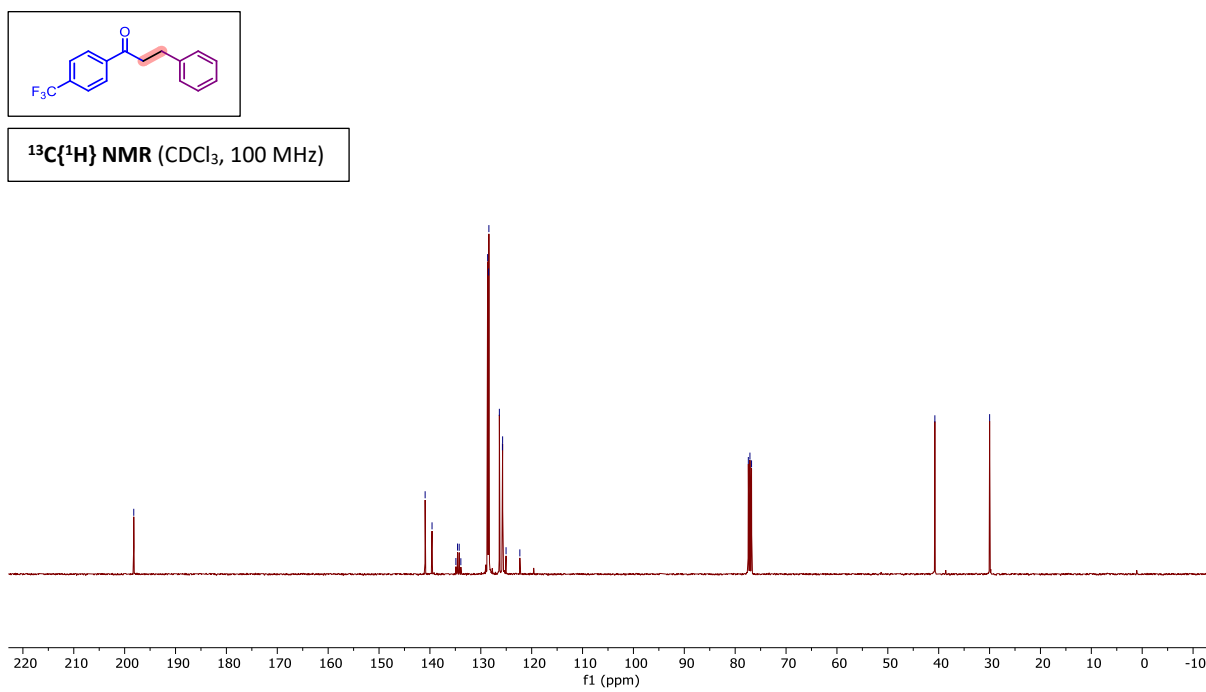



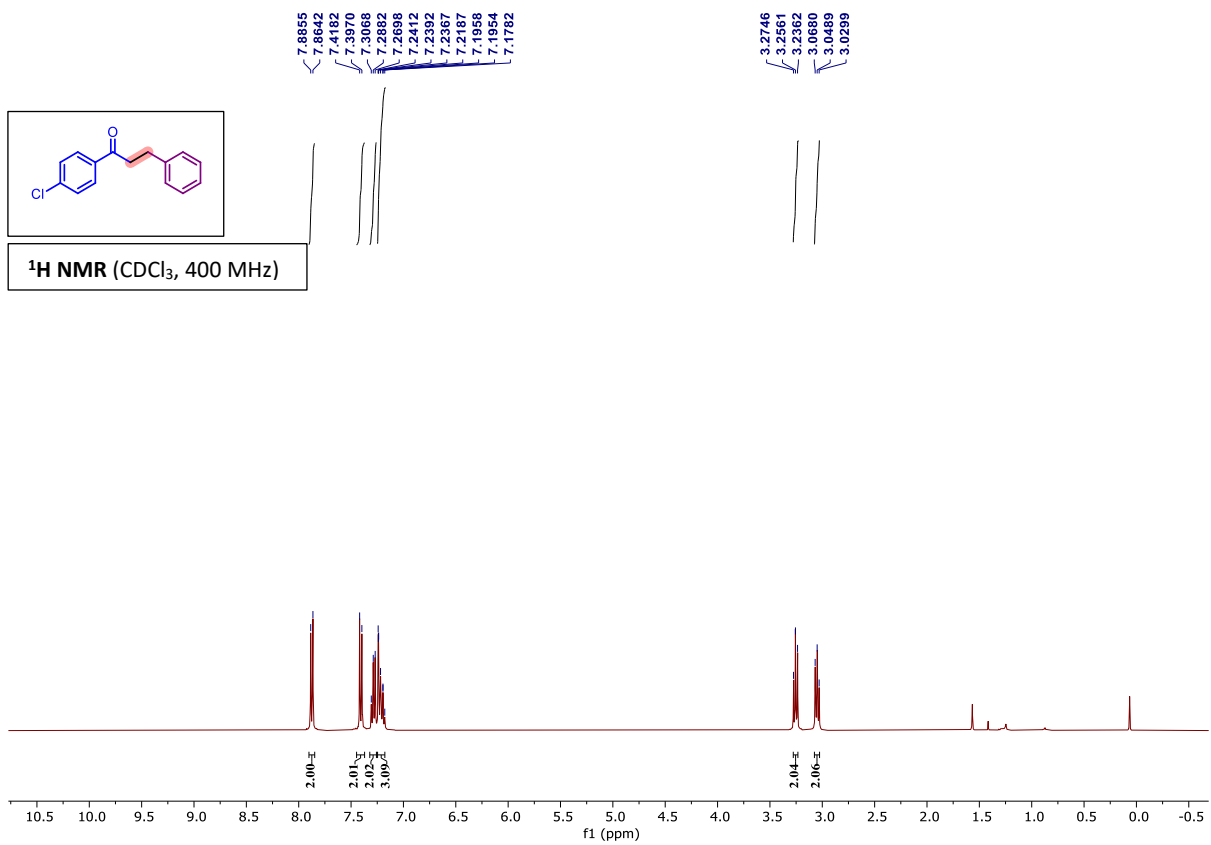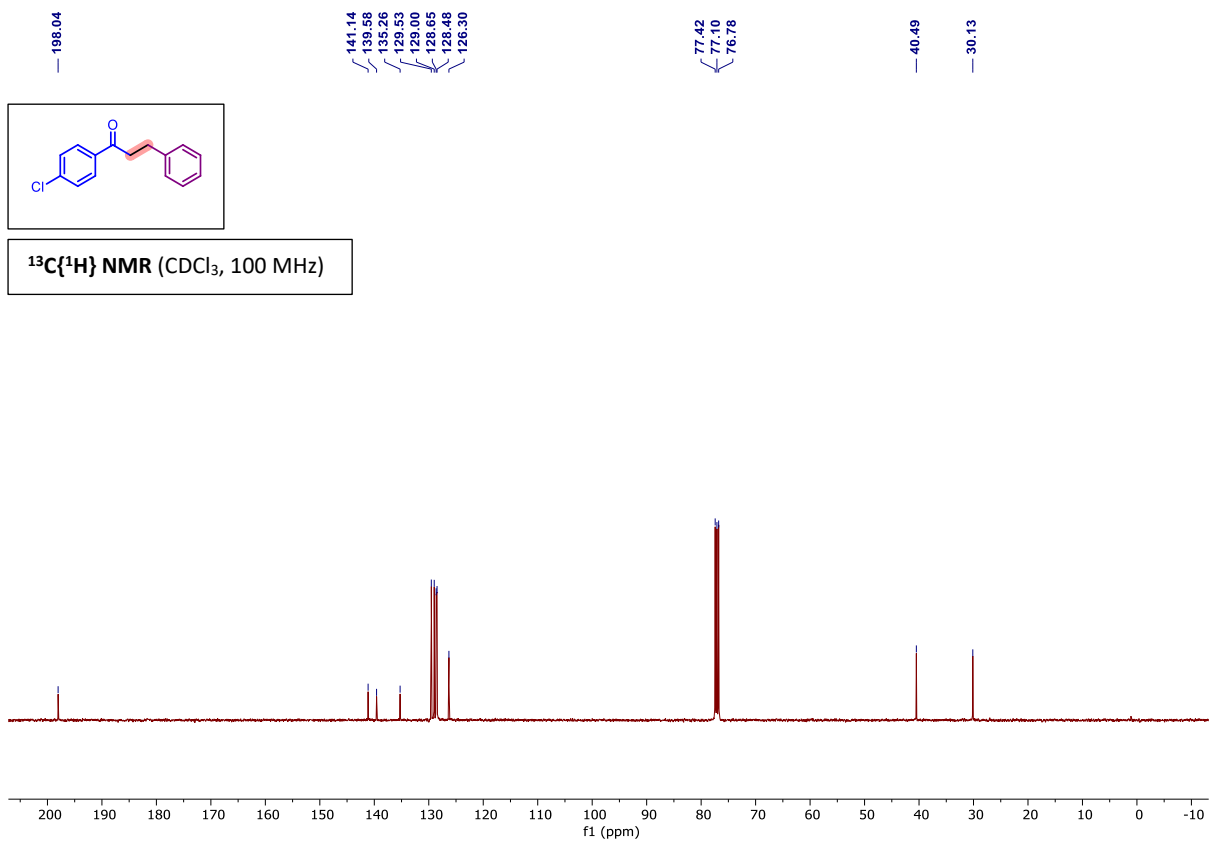

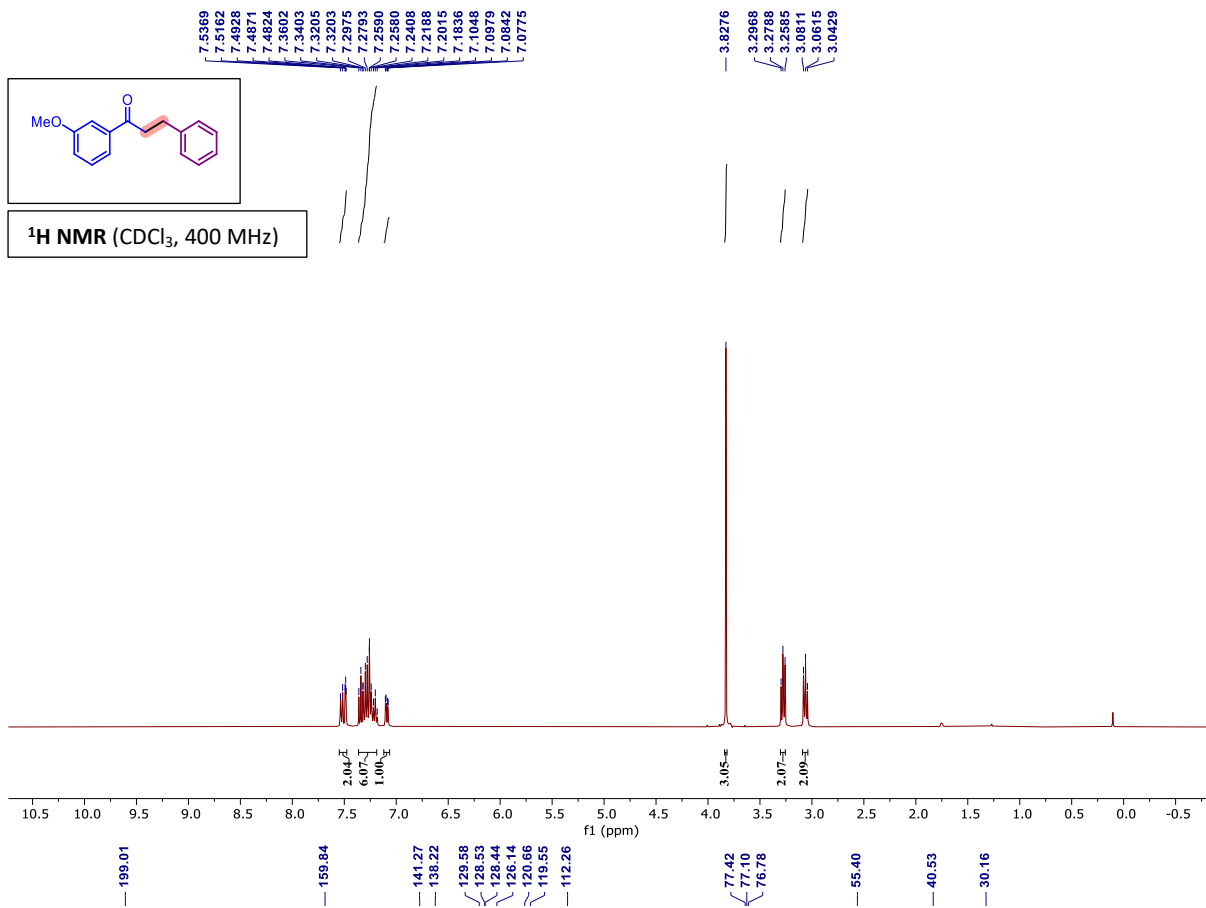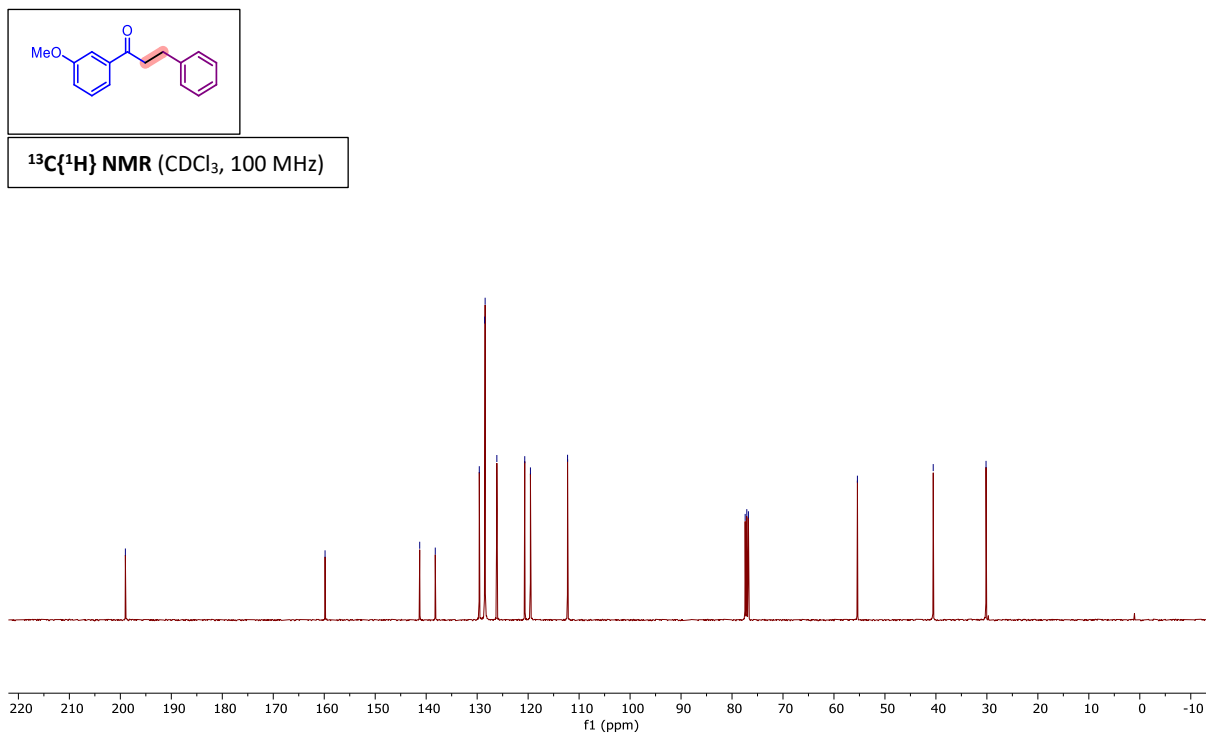

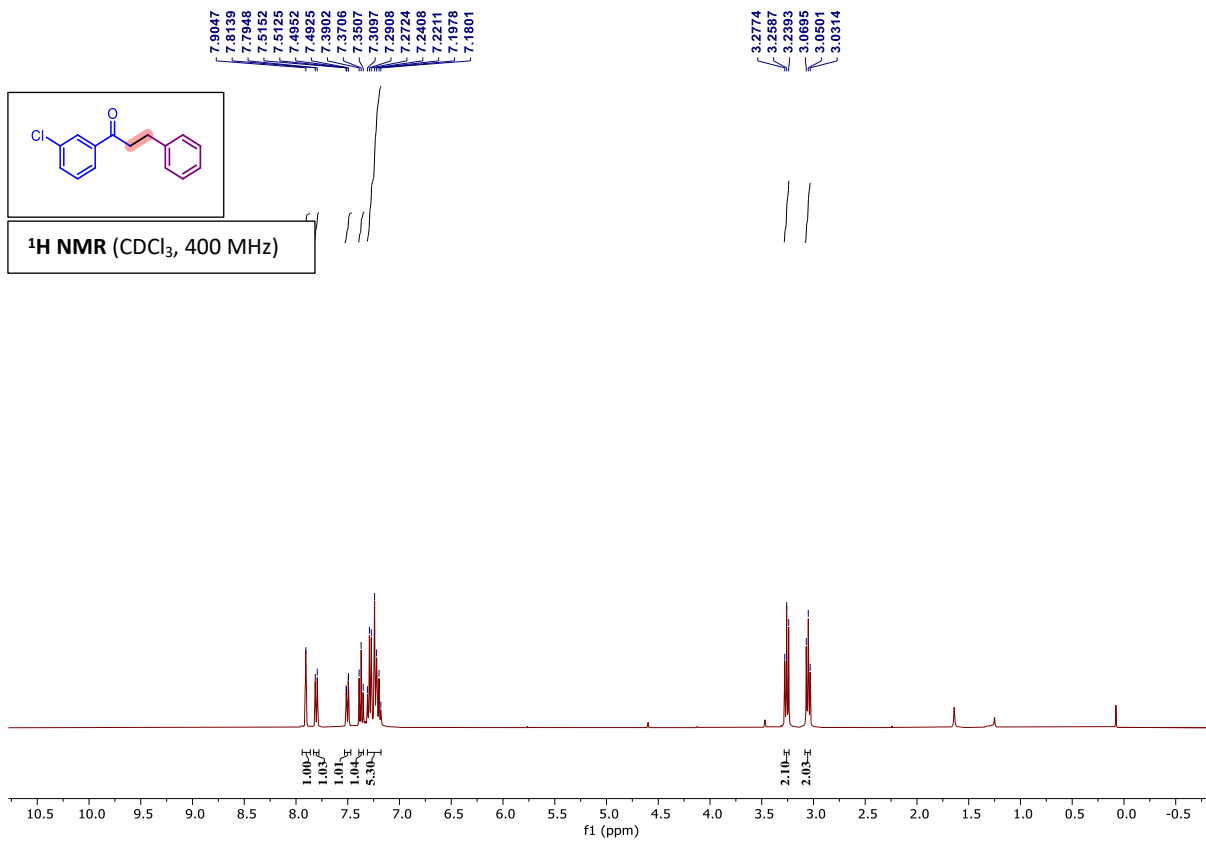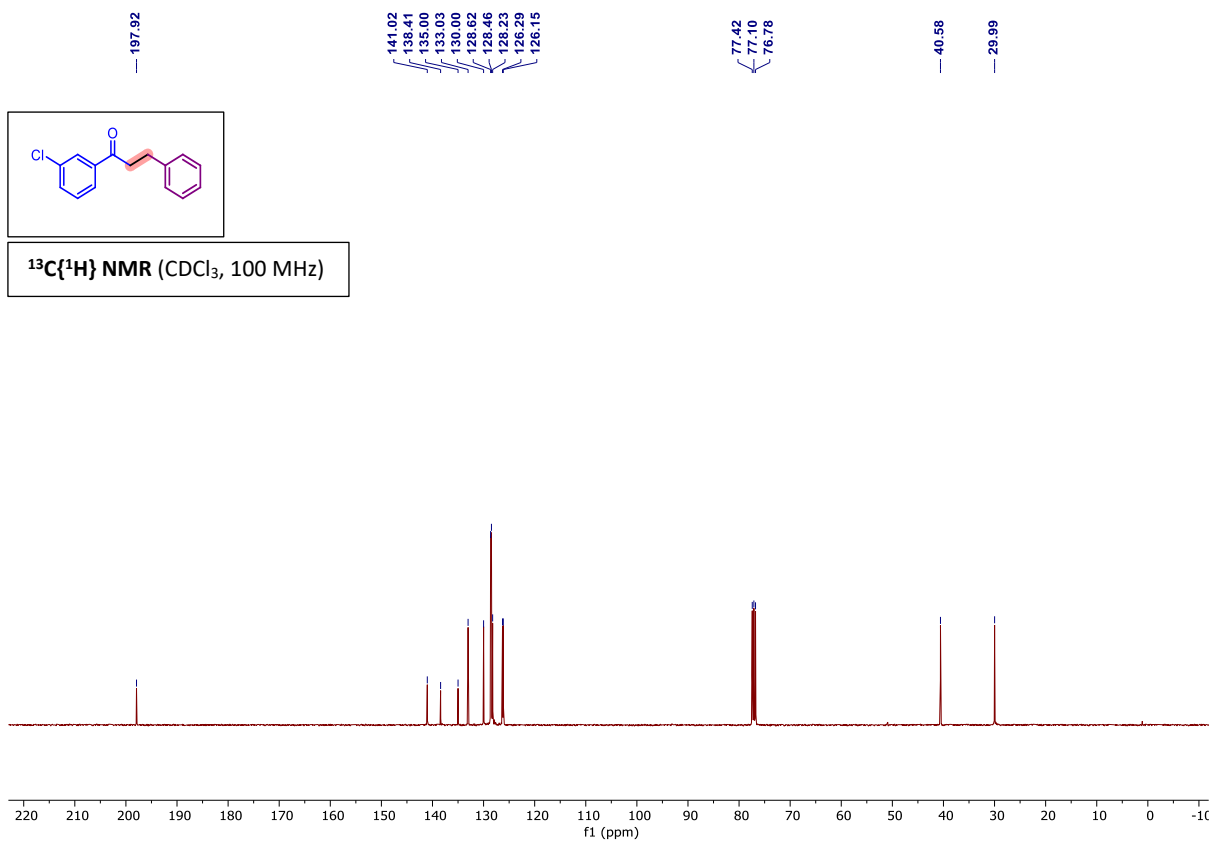

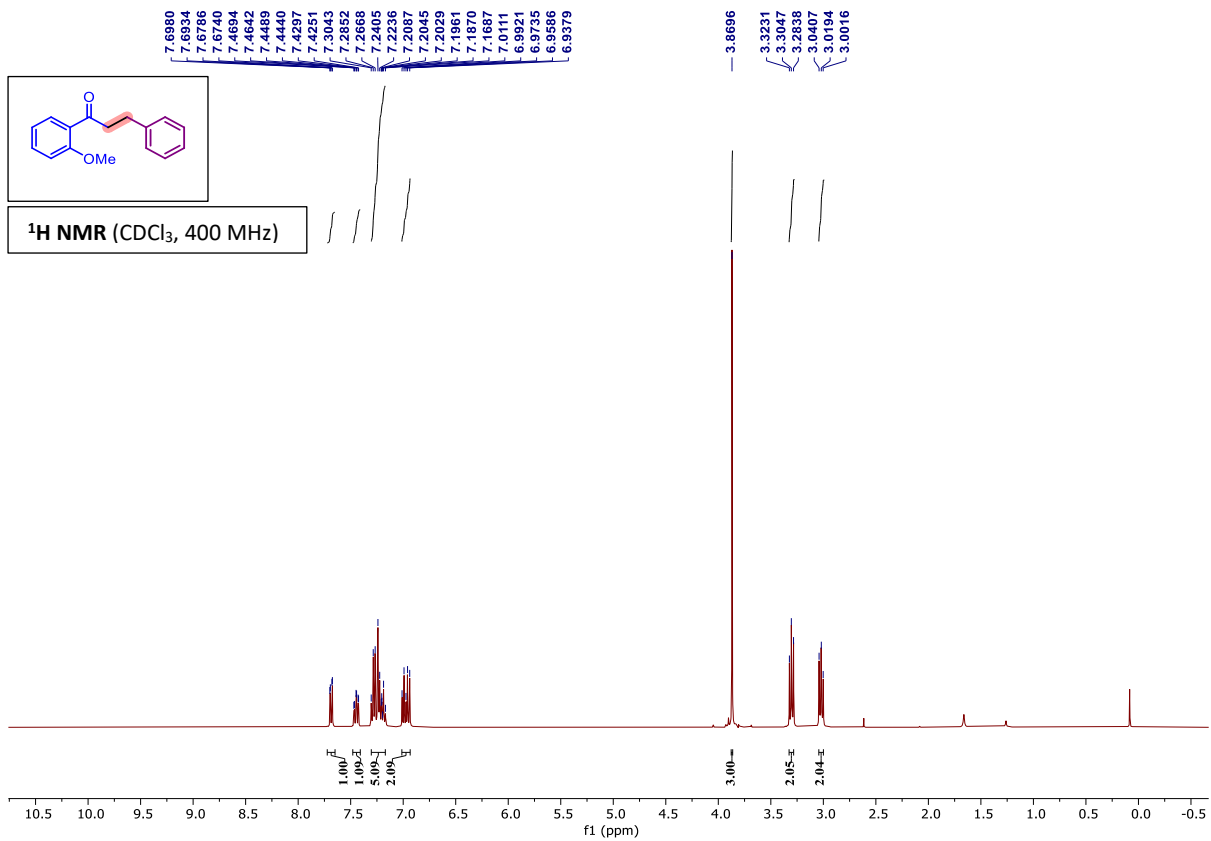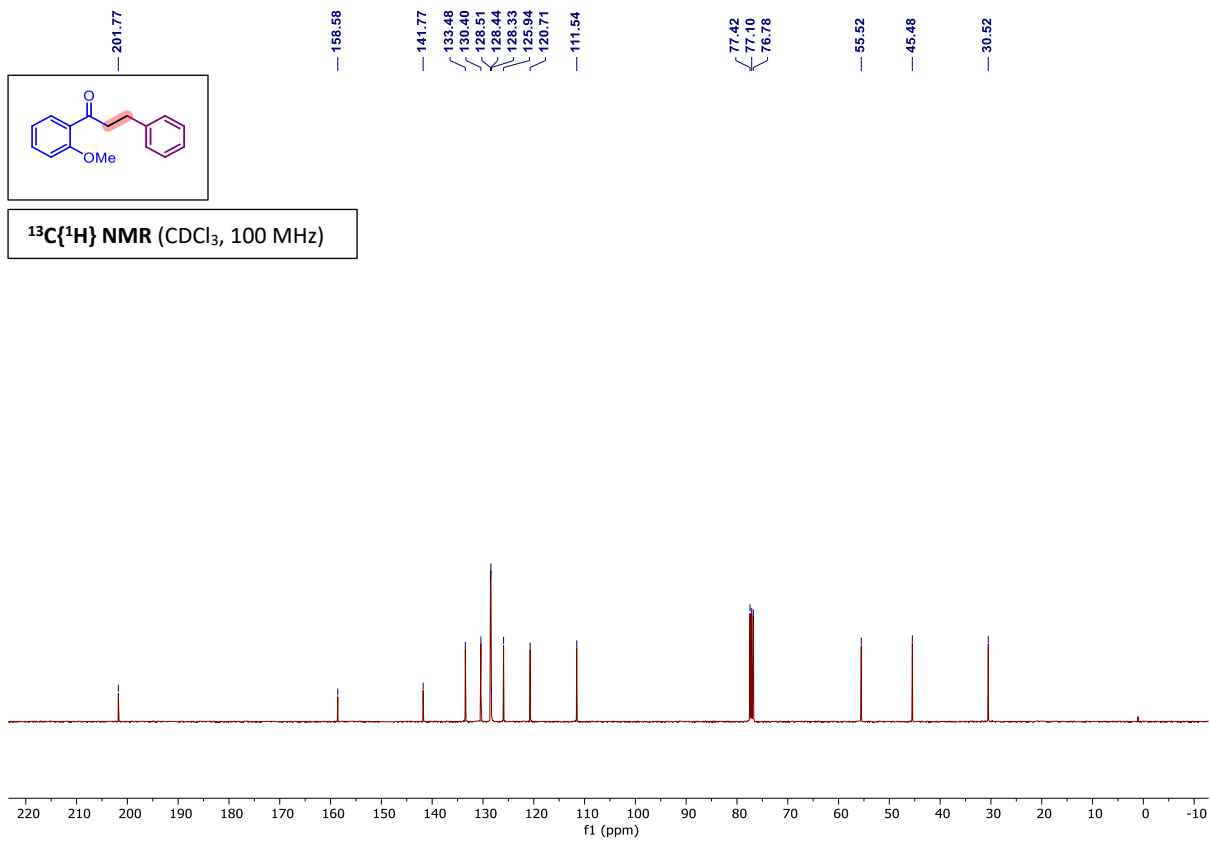

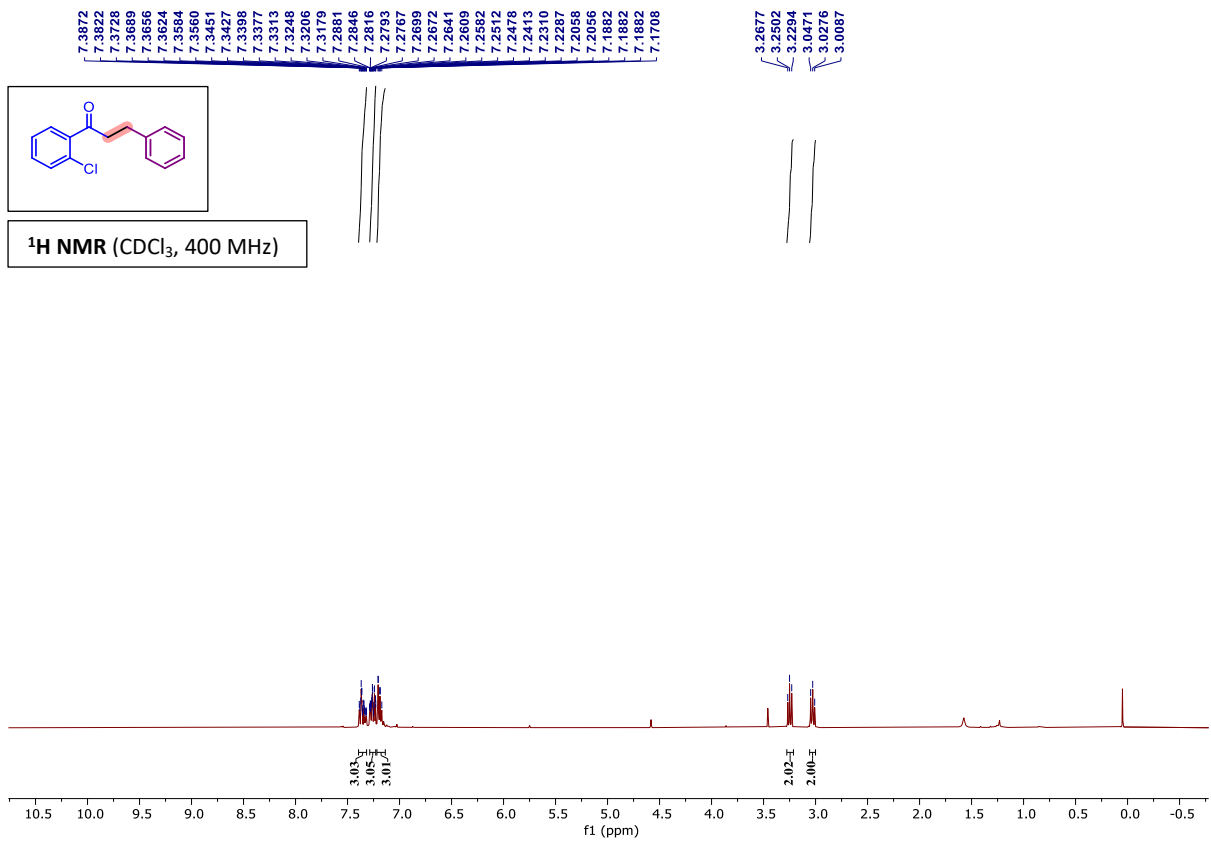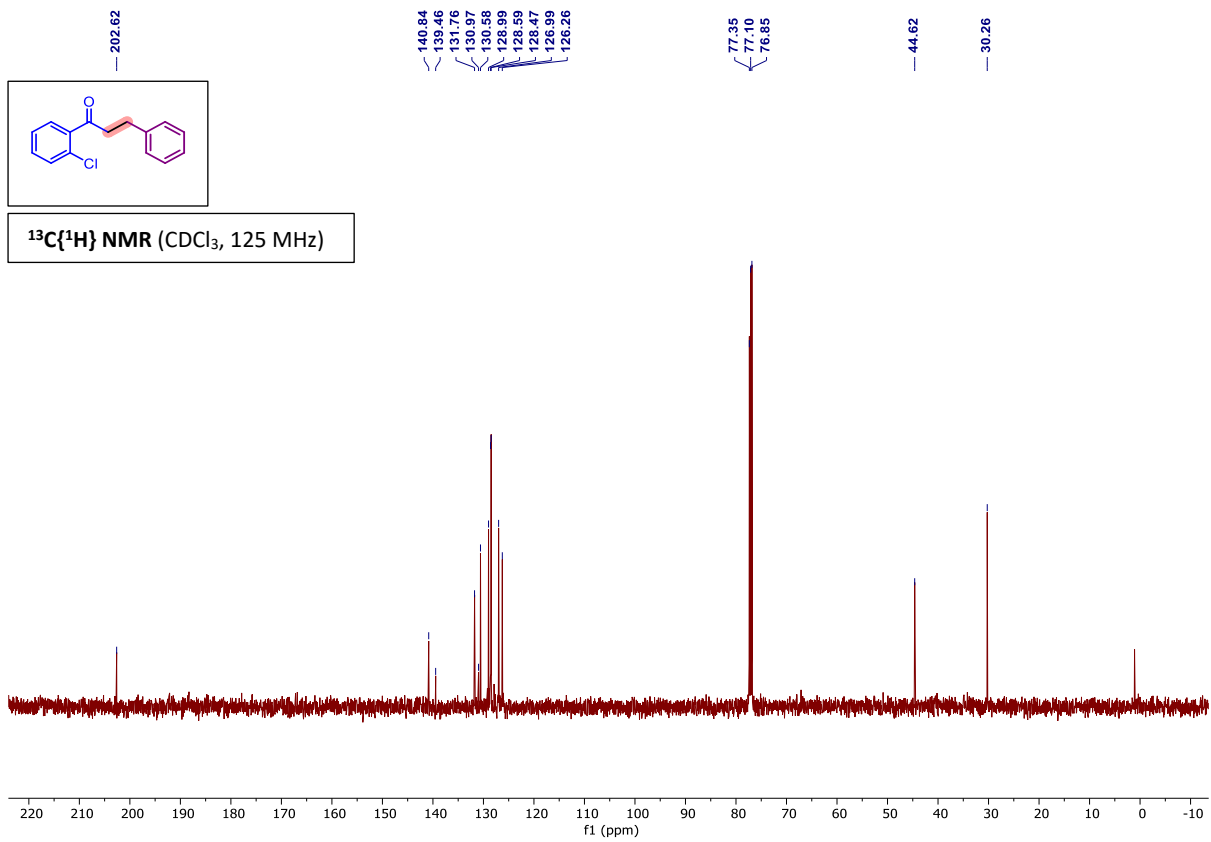

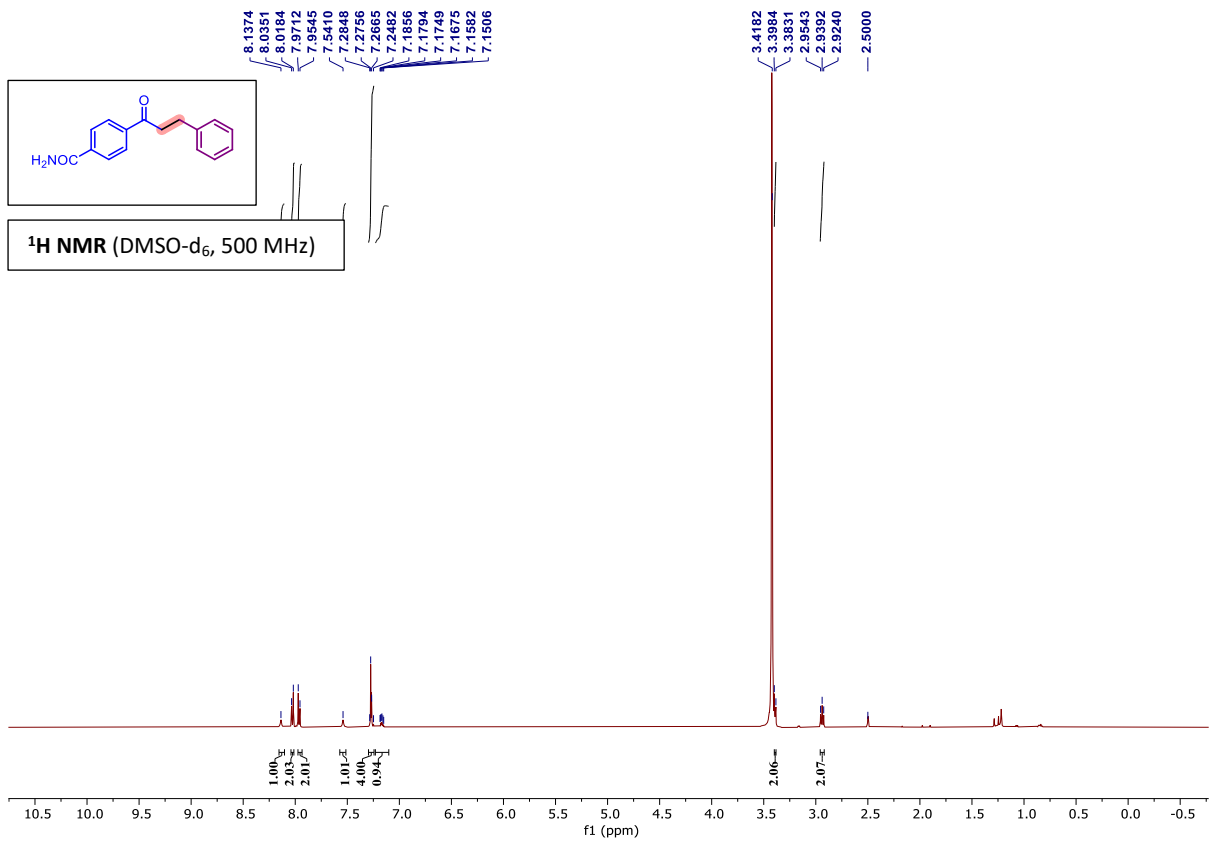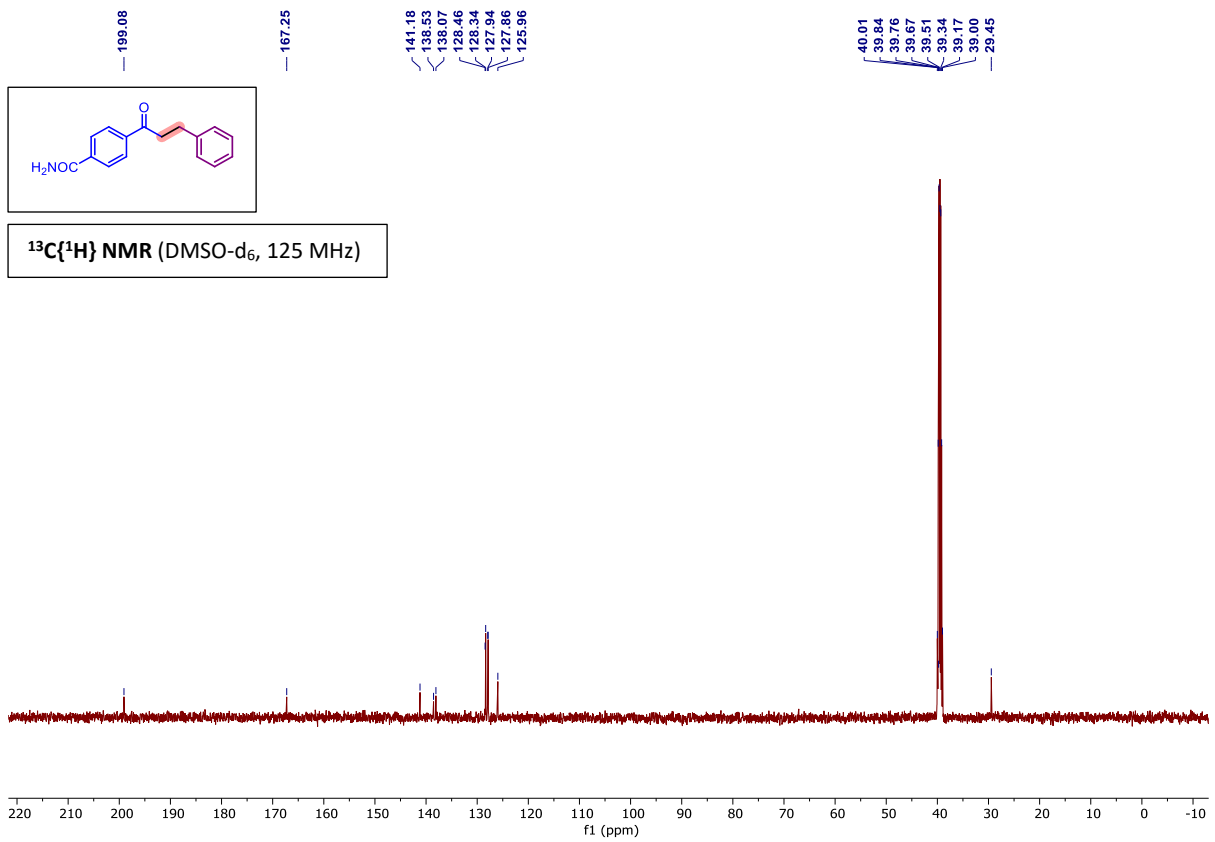

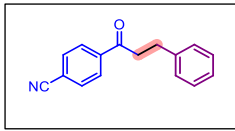

$^1\text{H NMR}$  ( $\text{CDCl}_3$ , 500 MHz)

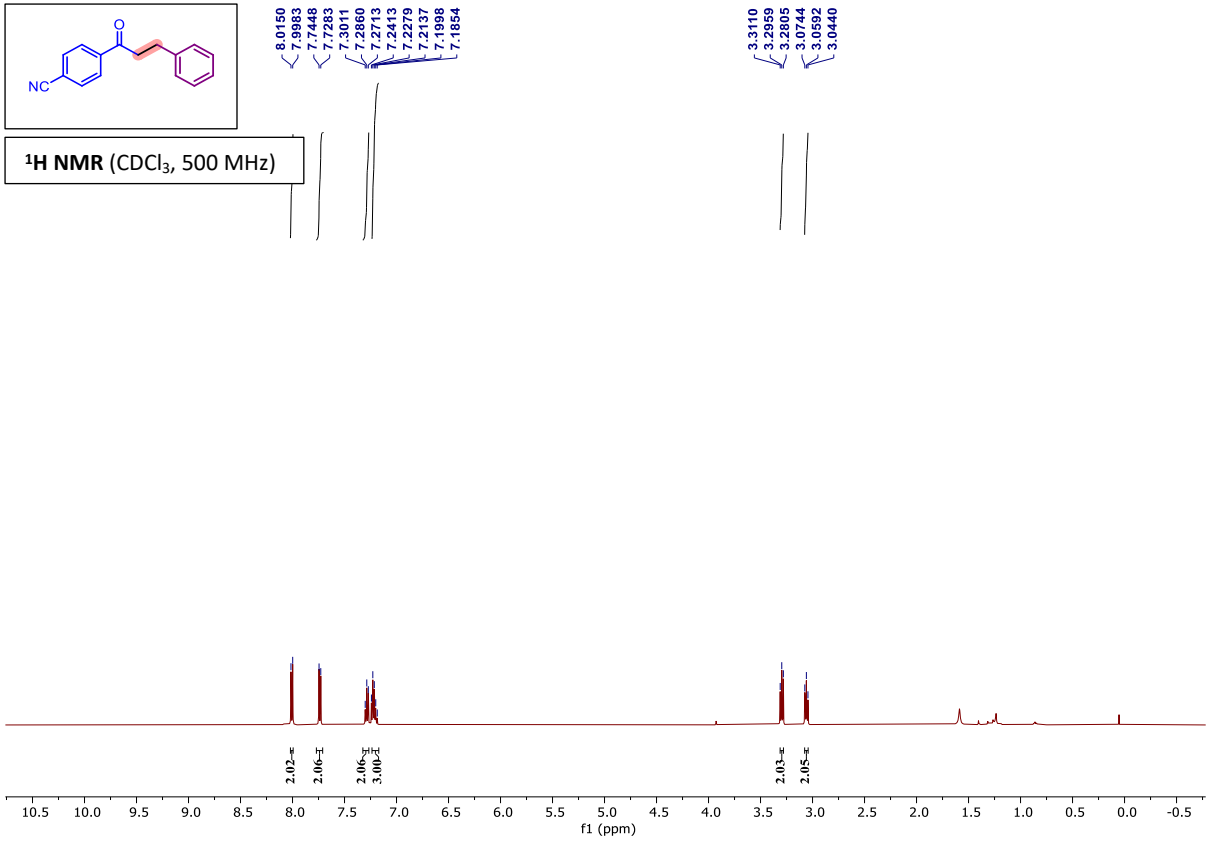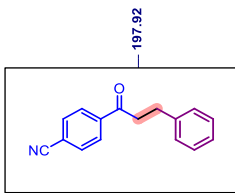

$^{13}\text{C}\{^1\text{H}\}$  NMR ( $\text{CDCl}_3$ , 125 MHz)

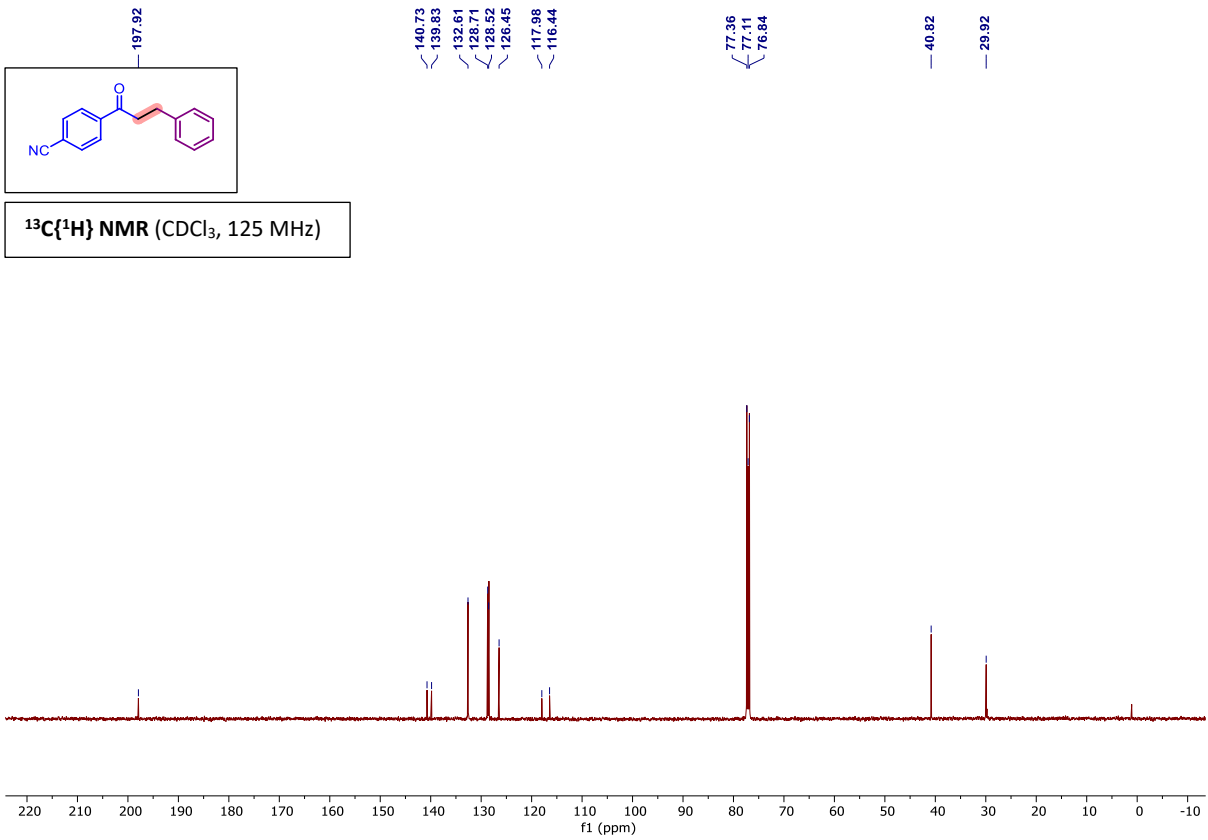

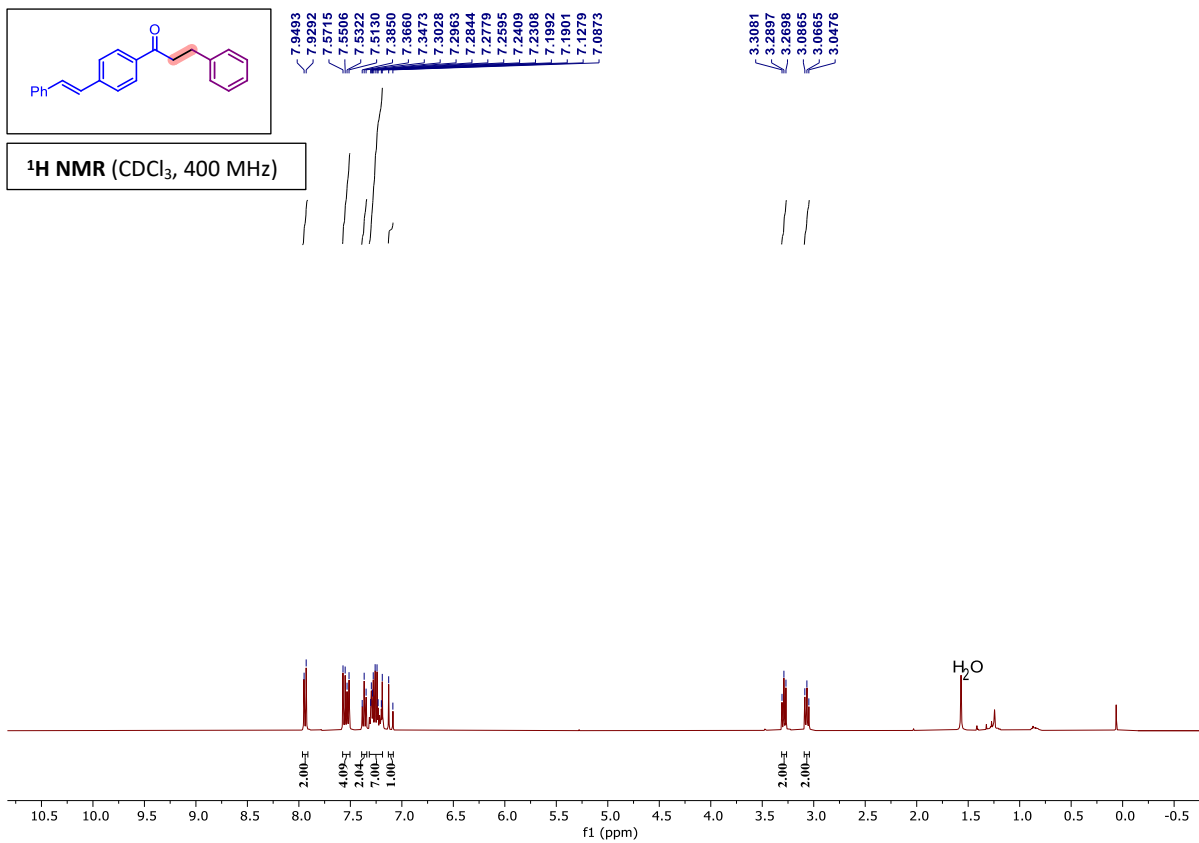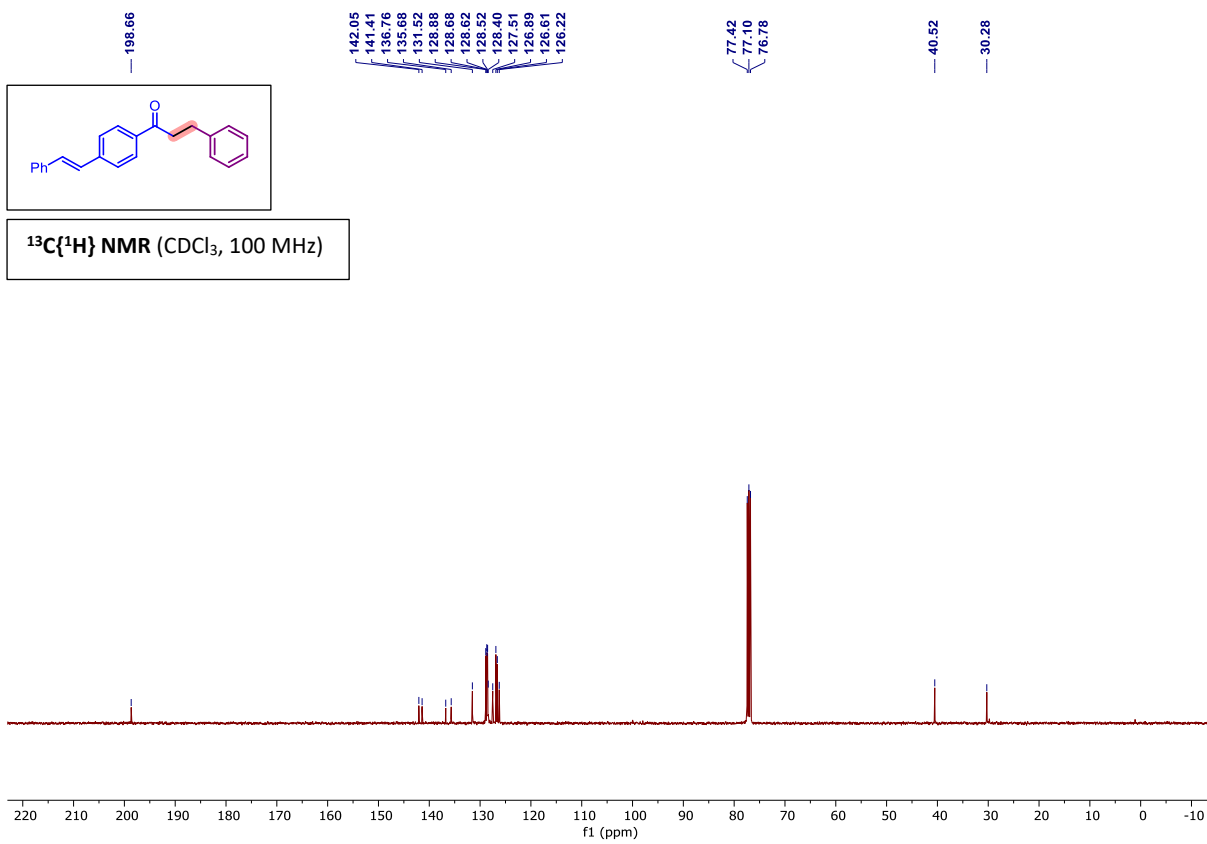



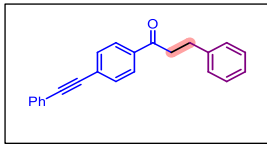

$^1\text{H NMR}$  ( $\text{CDCl}_3$ , 400 MHz)

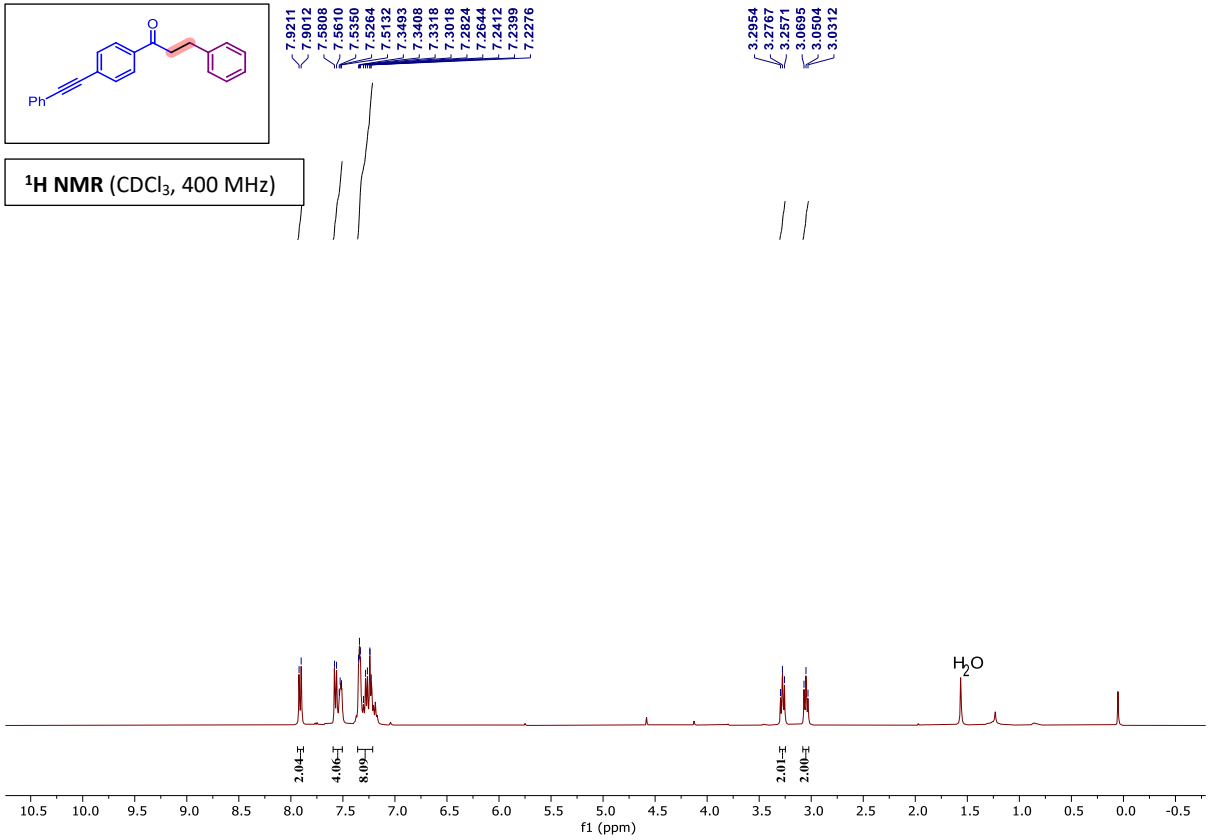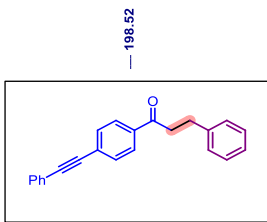

$^{13}\text{C}\{^1\text{H}\}$  NMR ( $\text{CDCl}_3$ , 100 MHz)

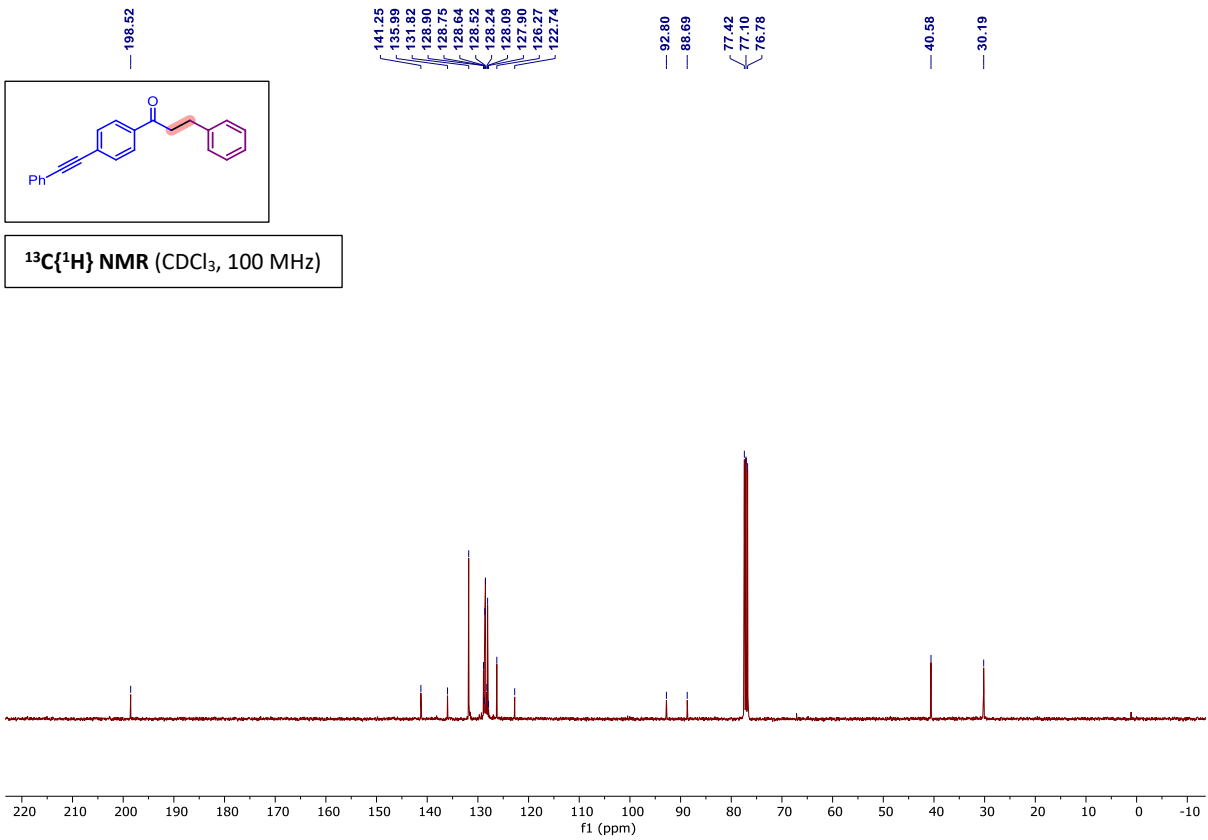

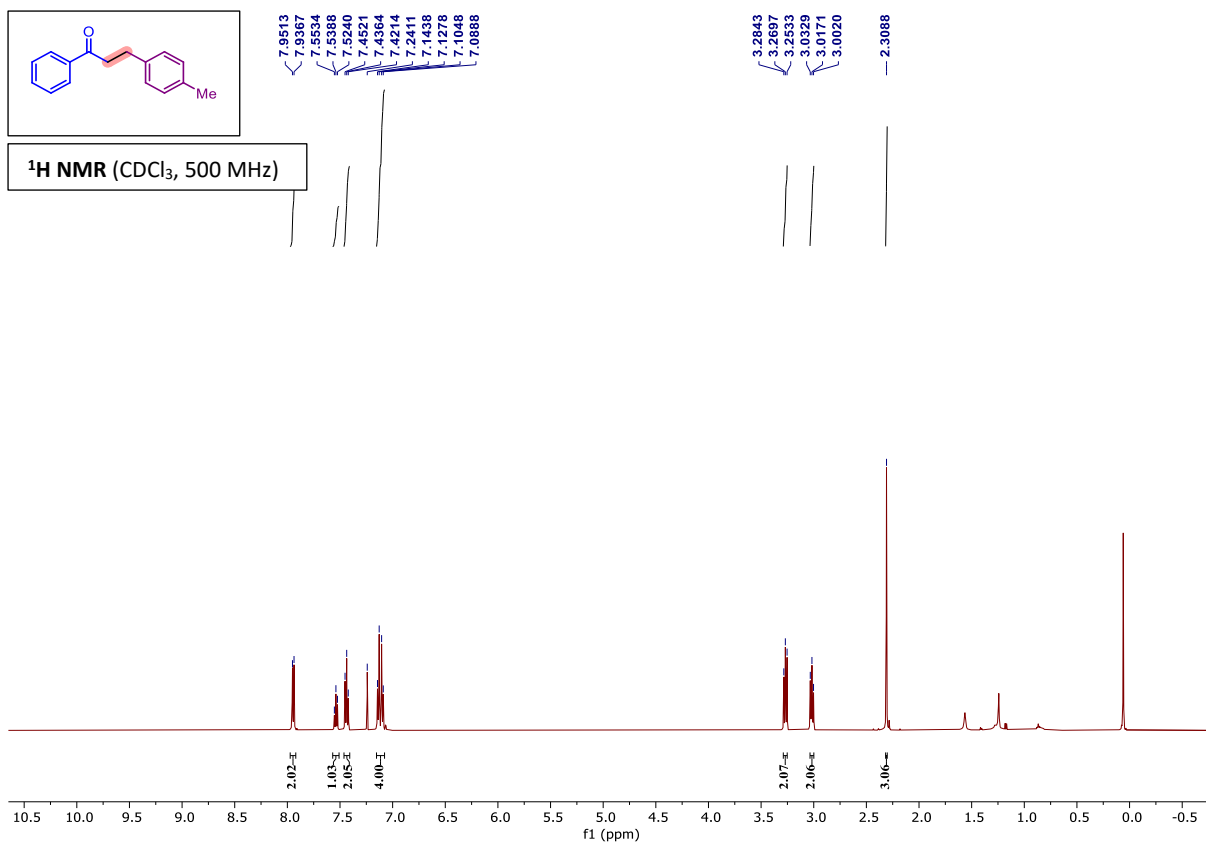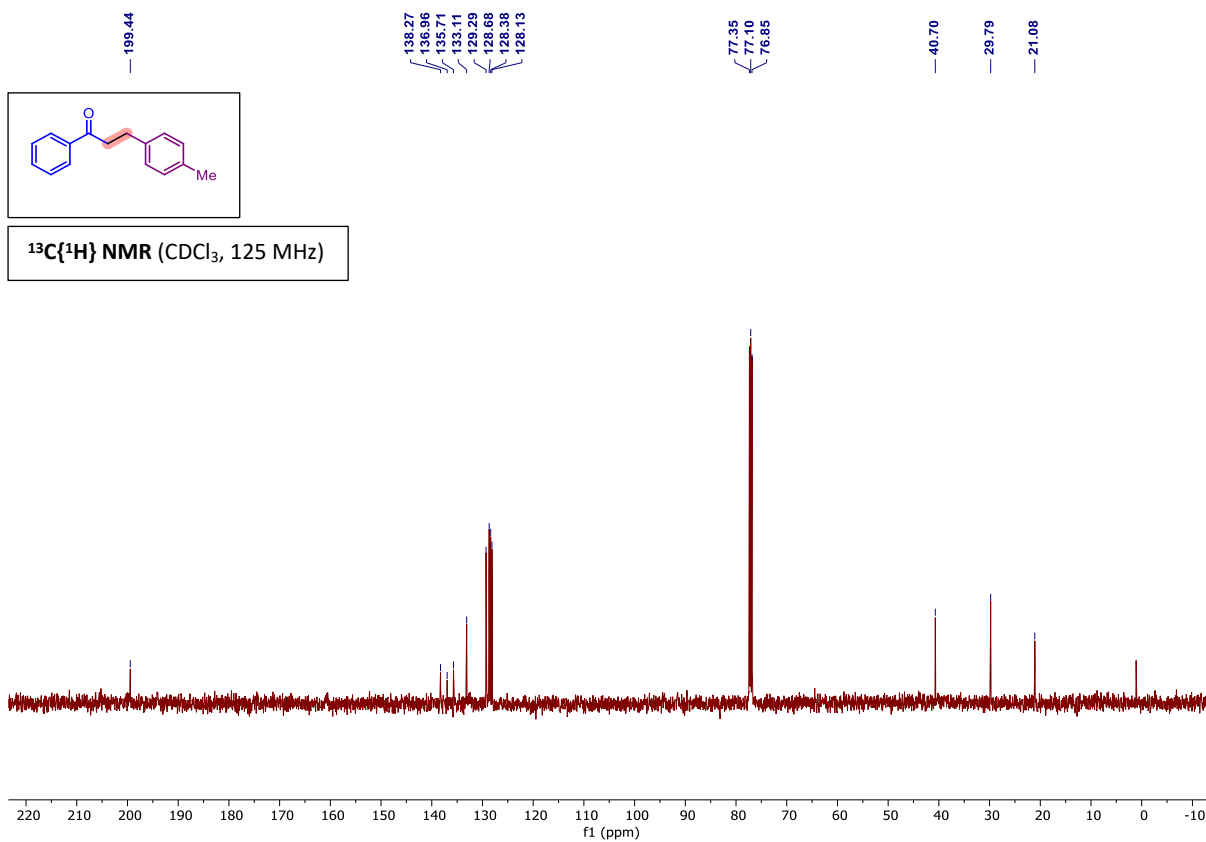

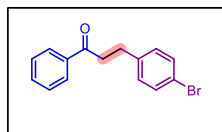

$^1\text{H NMR}$  ( $\text{CDCl}_3$ , 400 MHz)

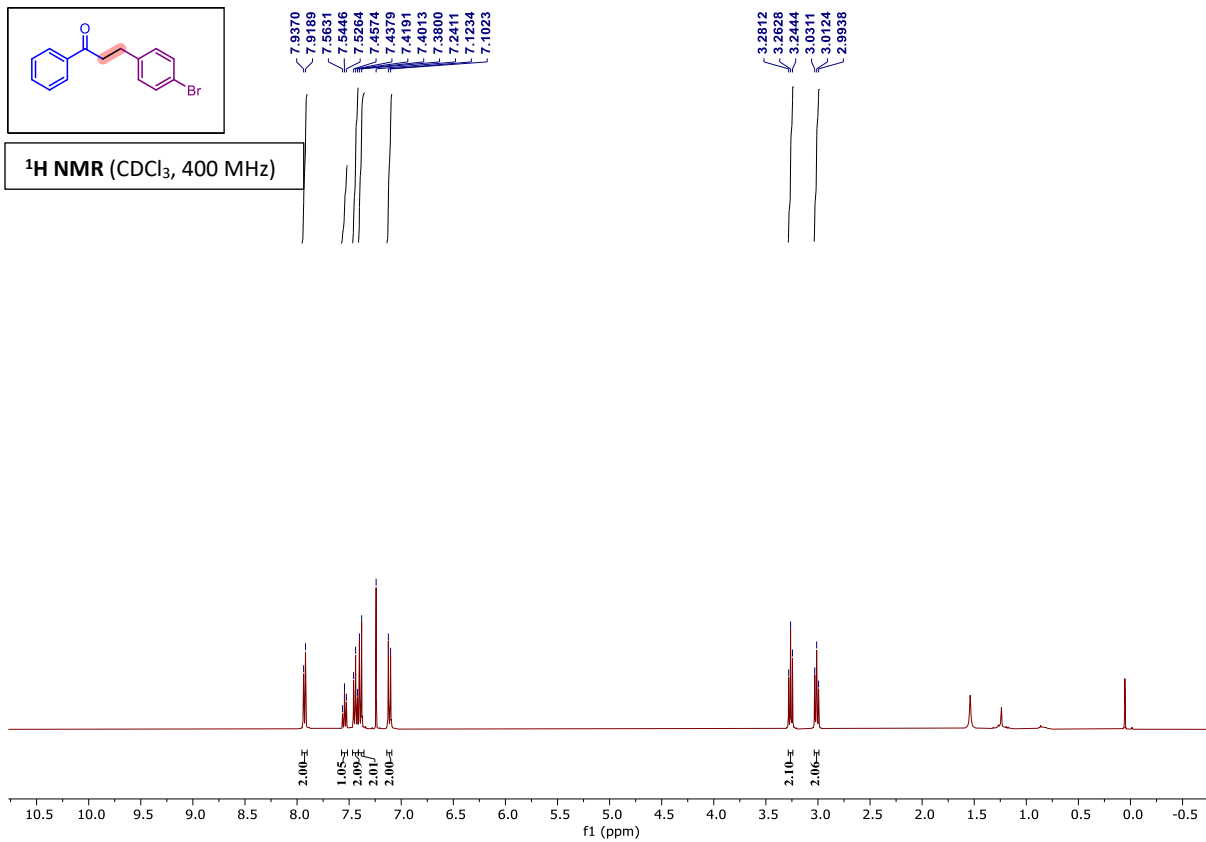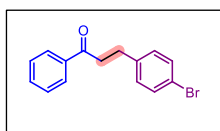

$^{13}\text{C}\{^1\text{H}\}$  NMR ( $\text{CDCl}_3$ , 100 MHz)

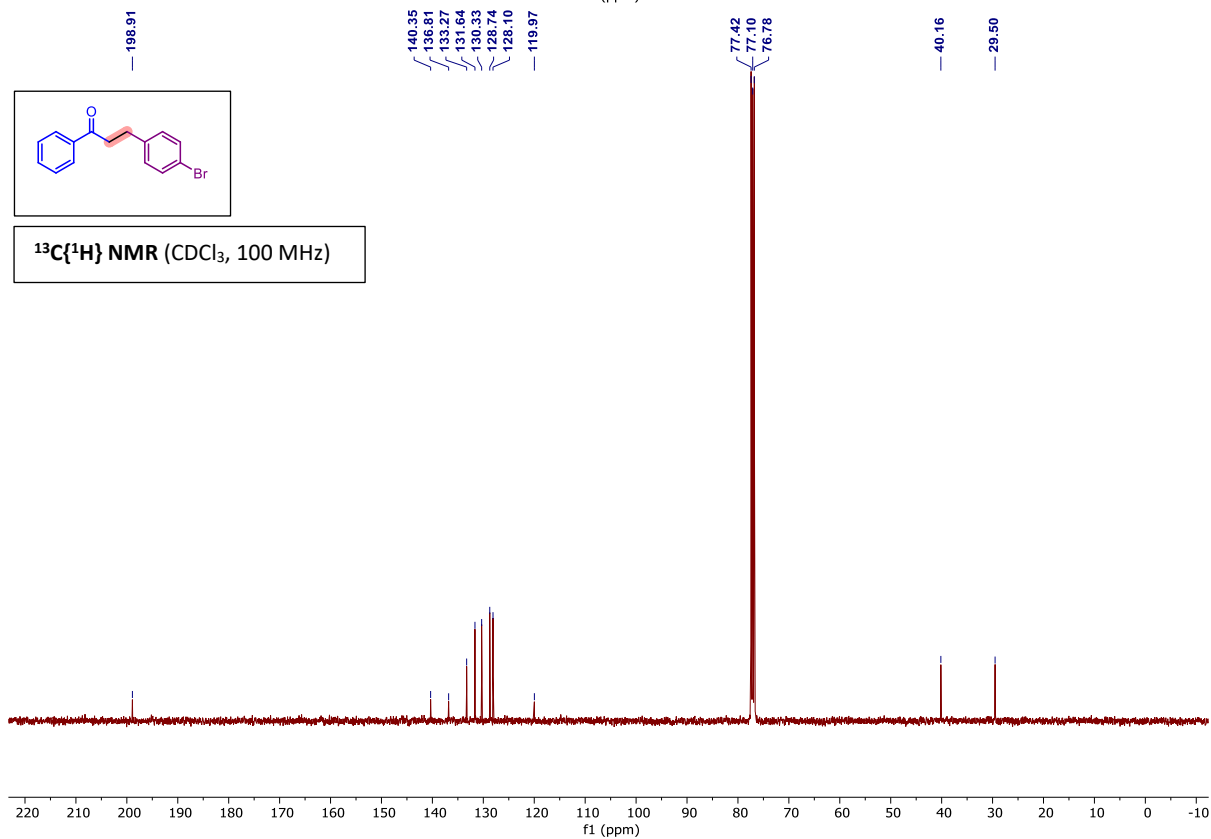

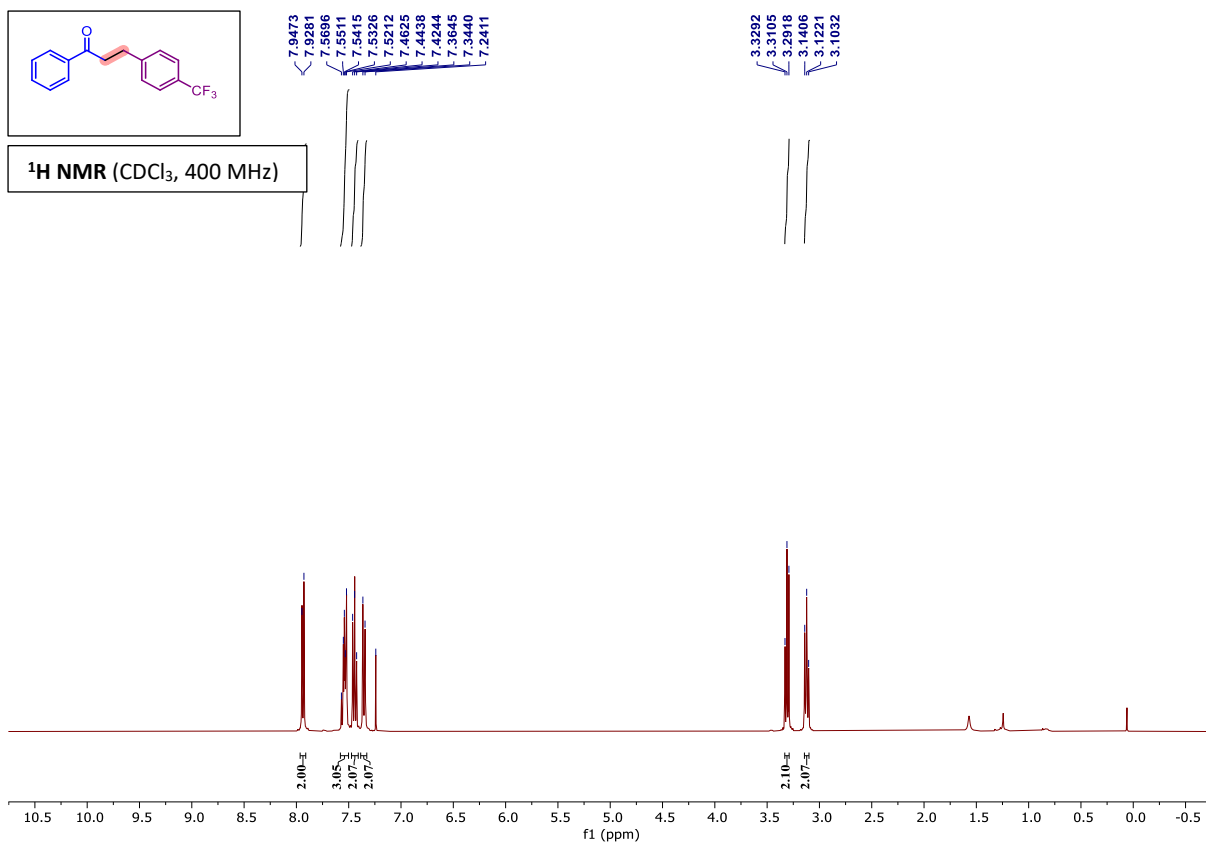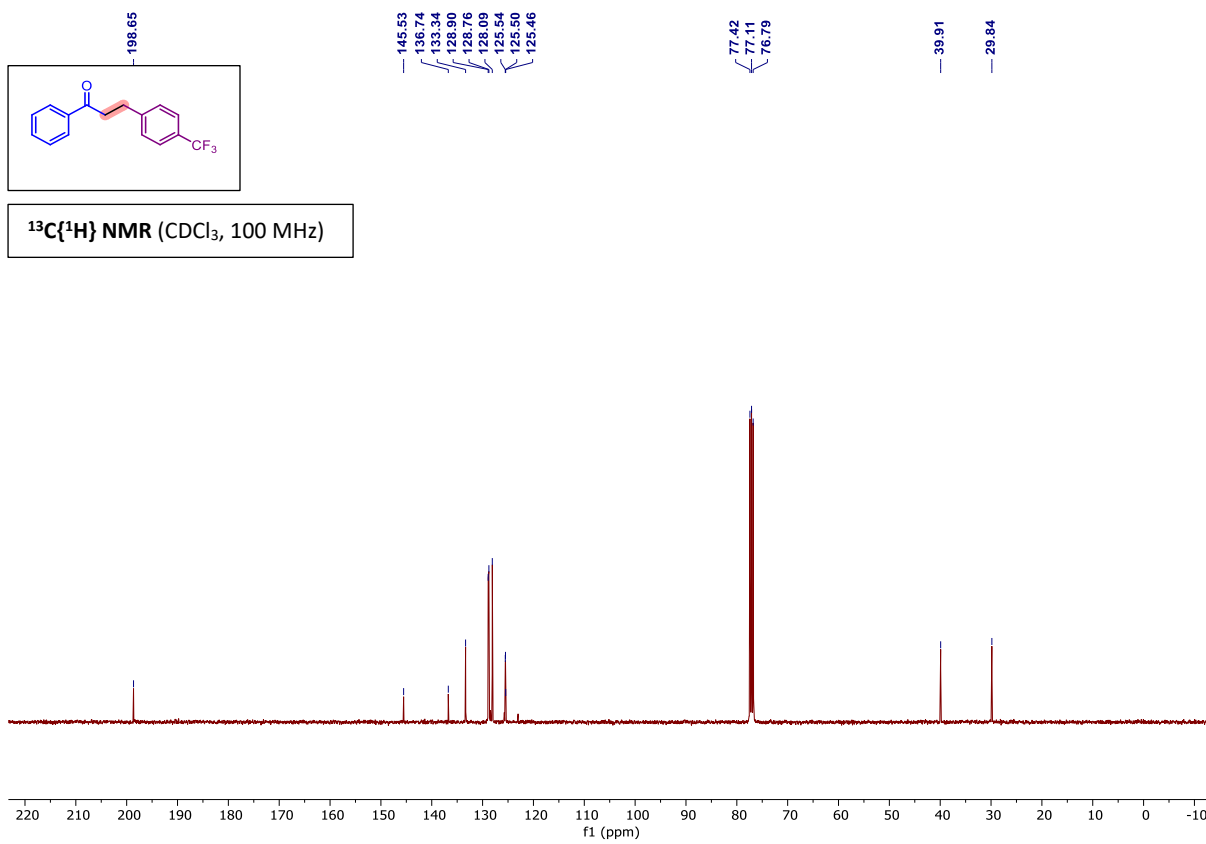

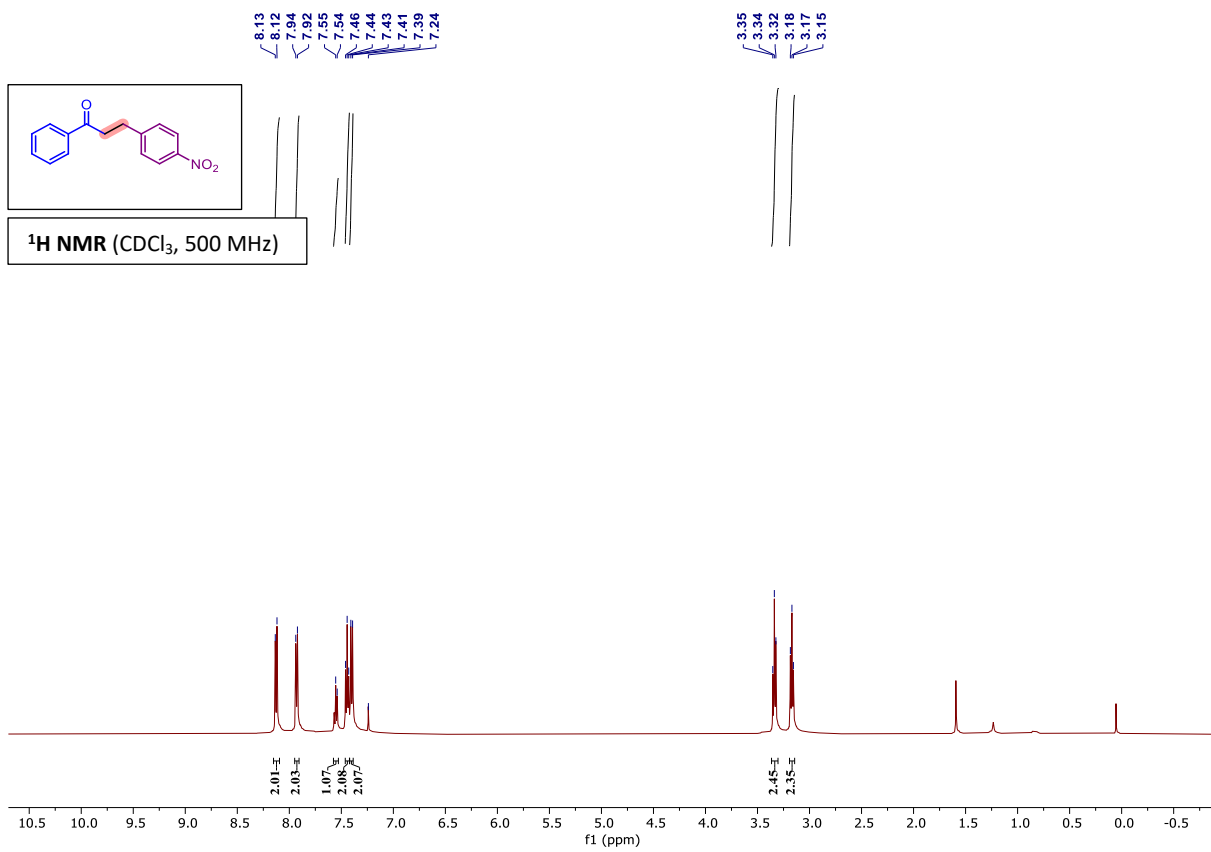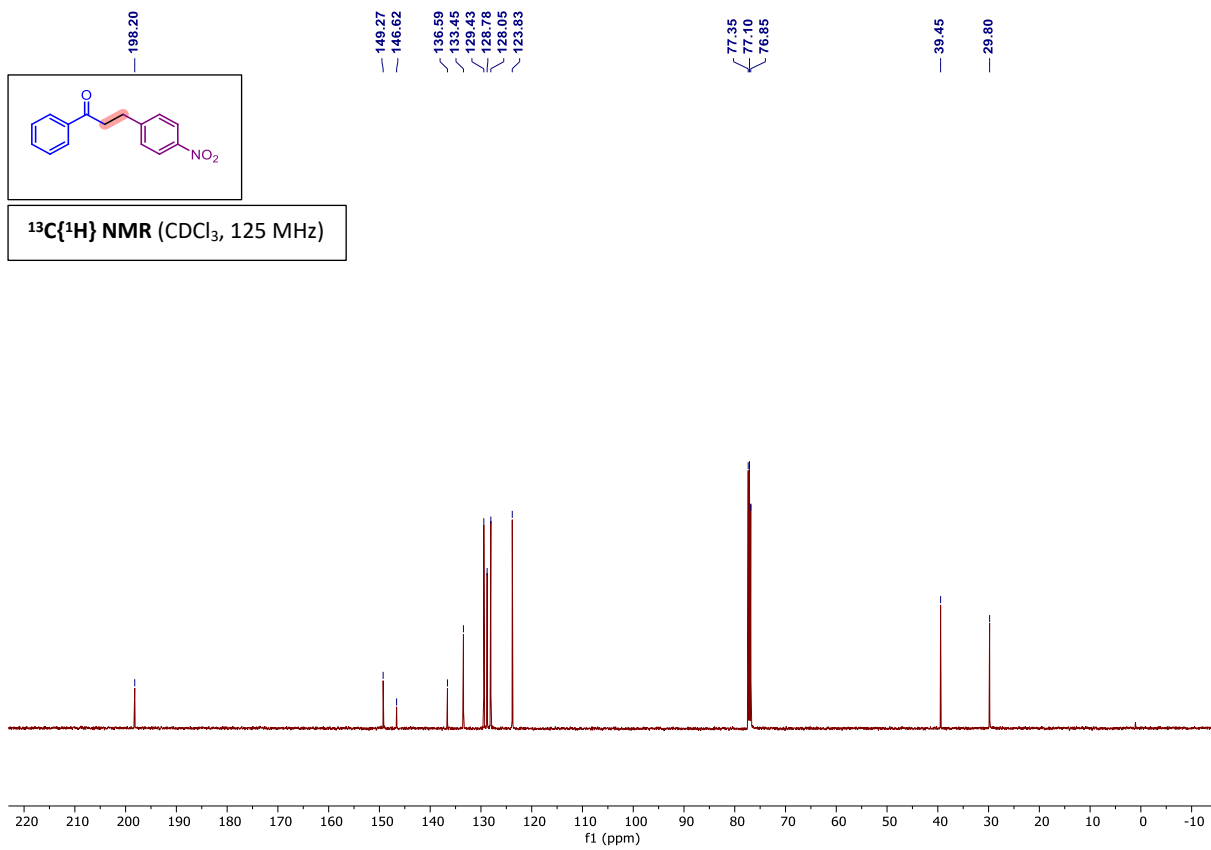

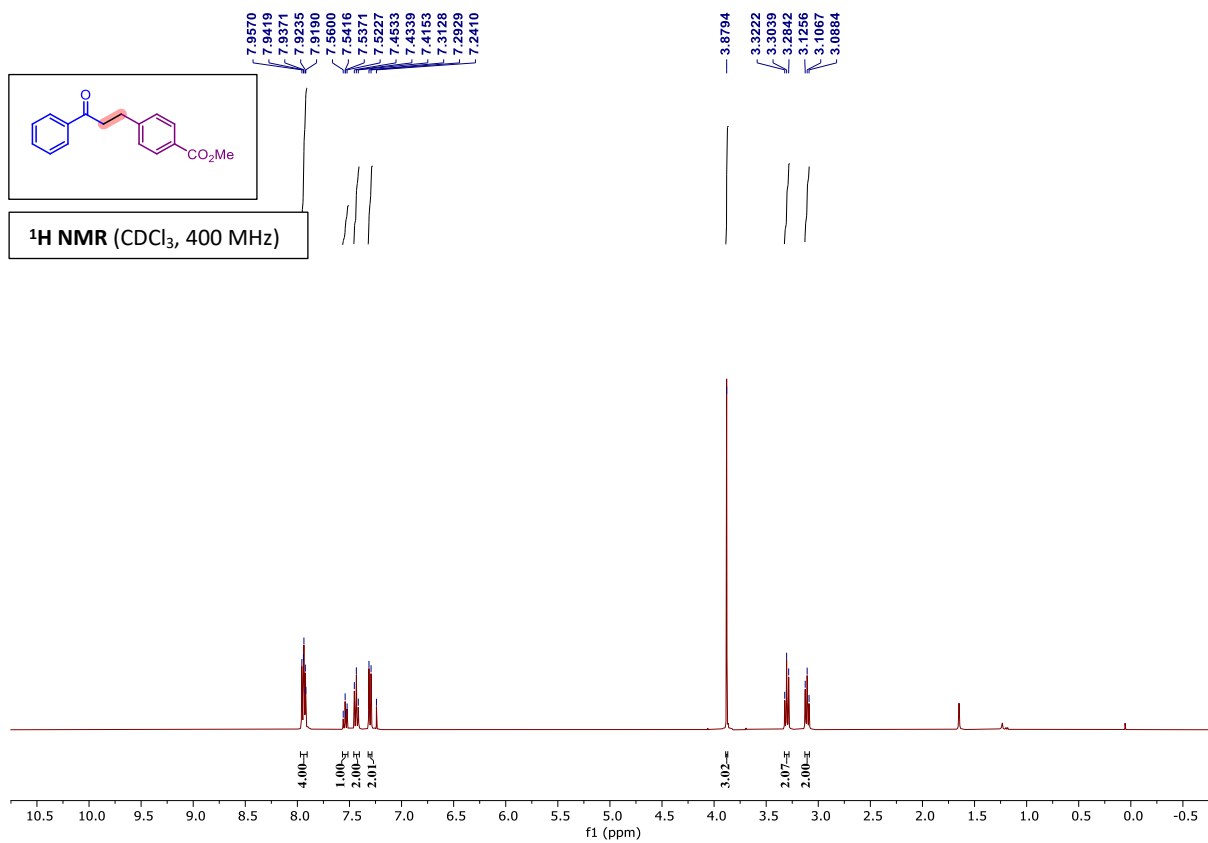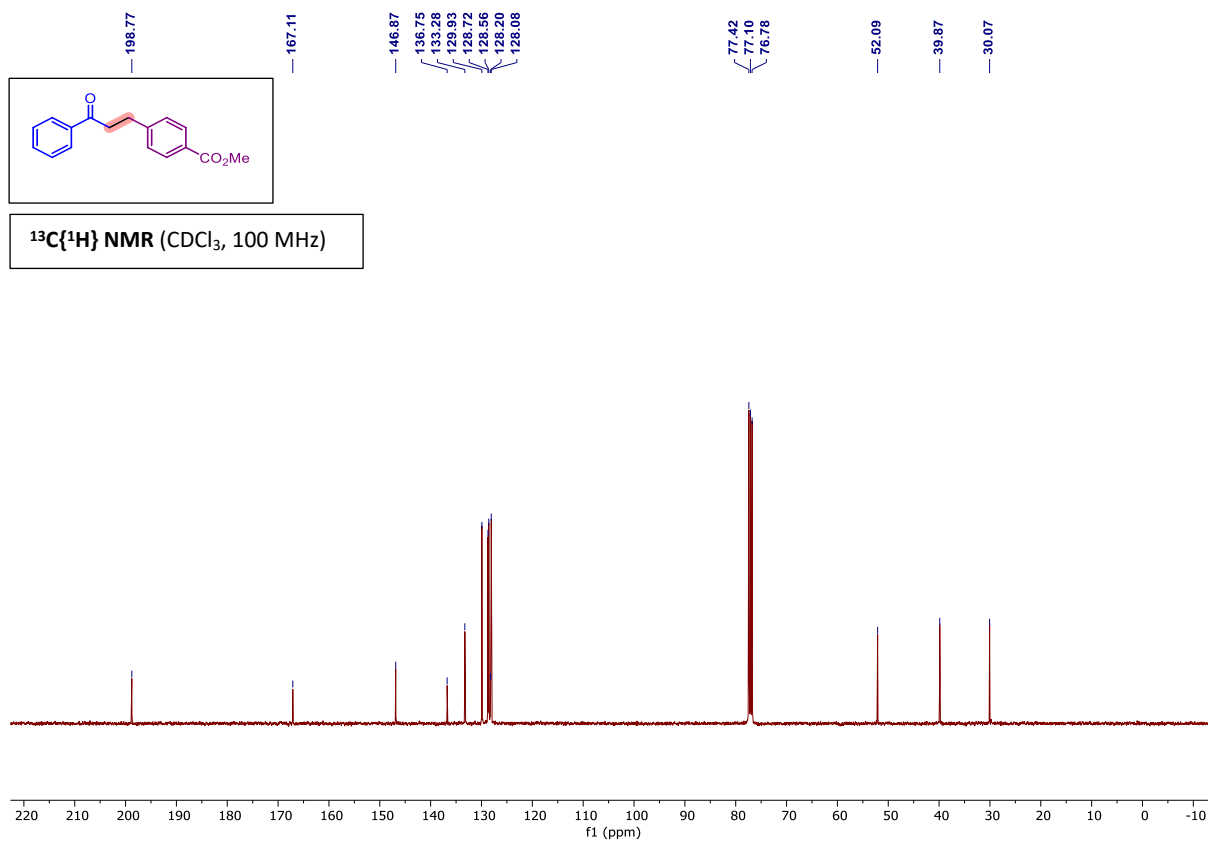

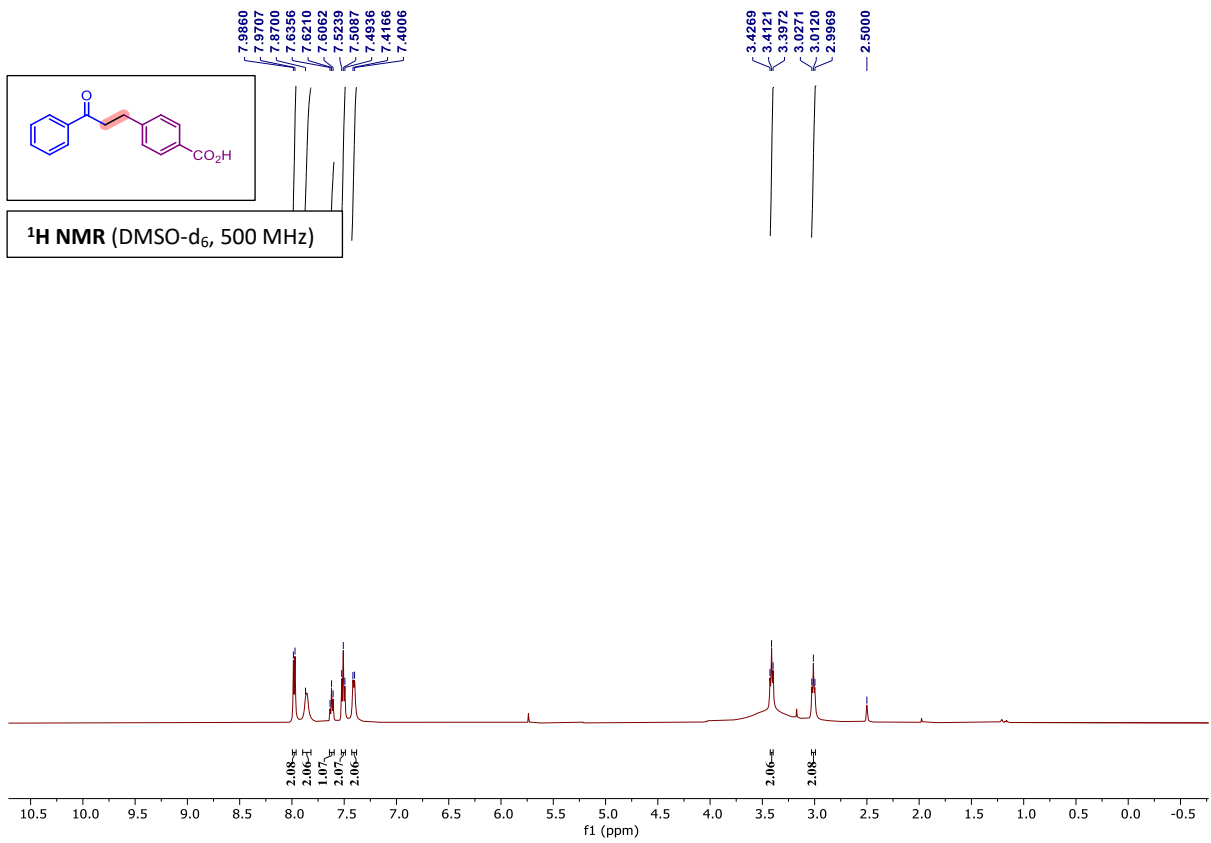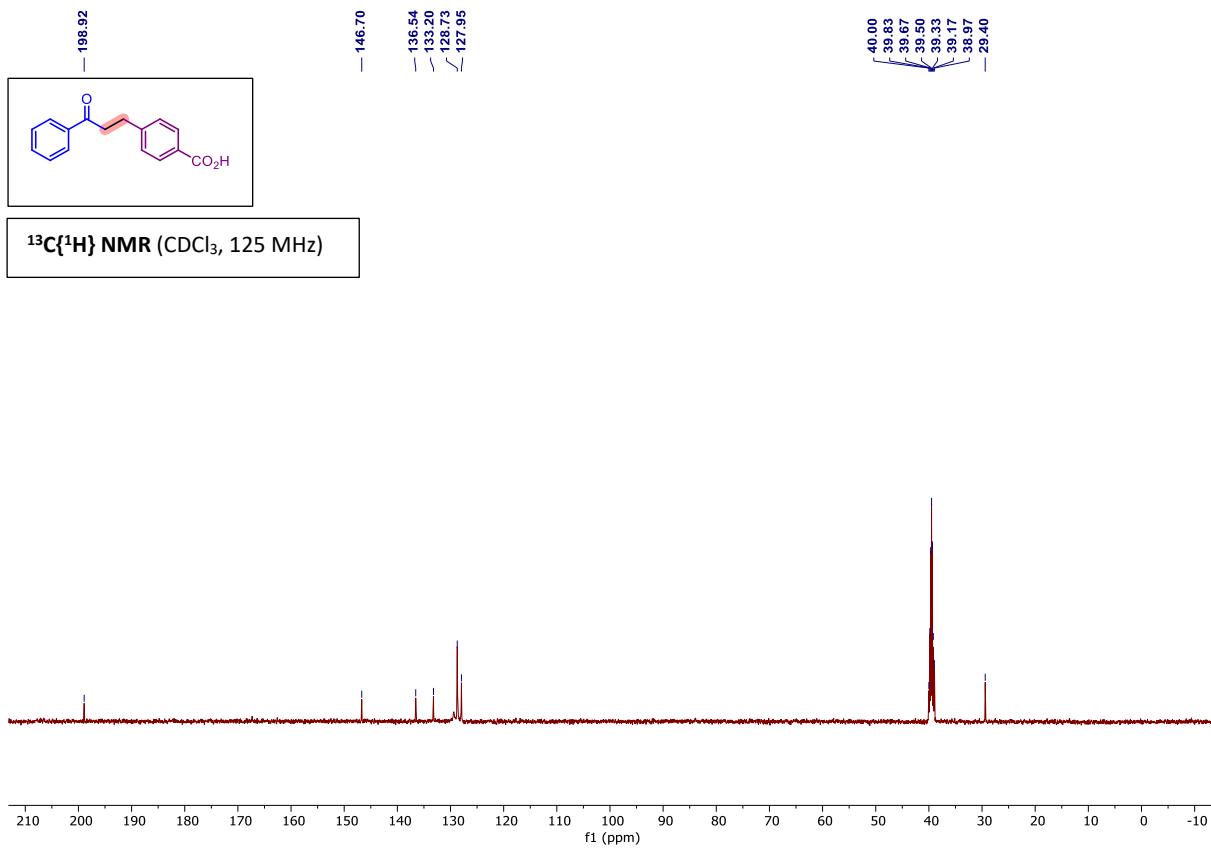

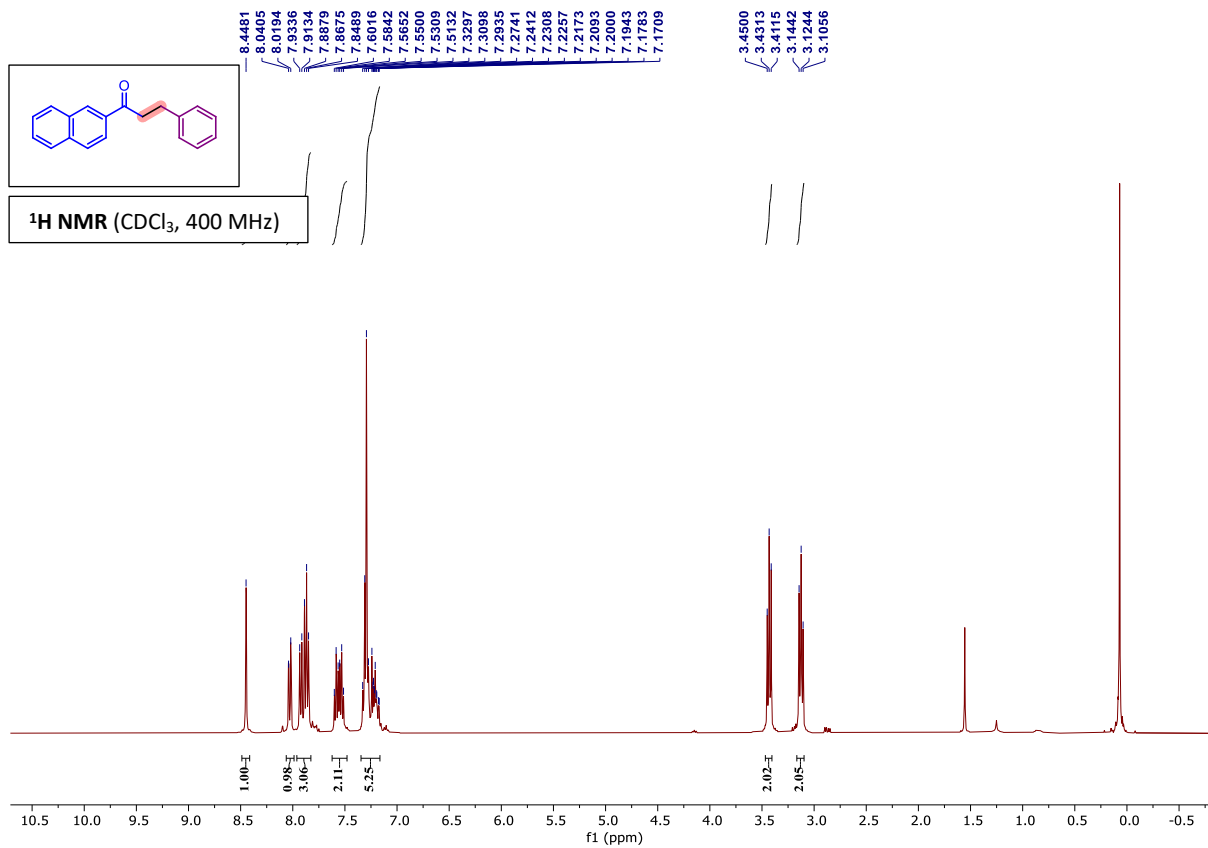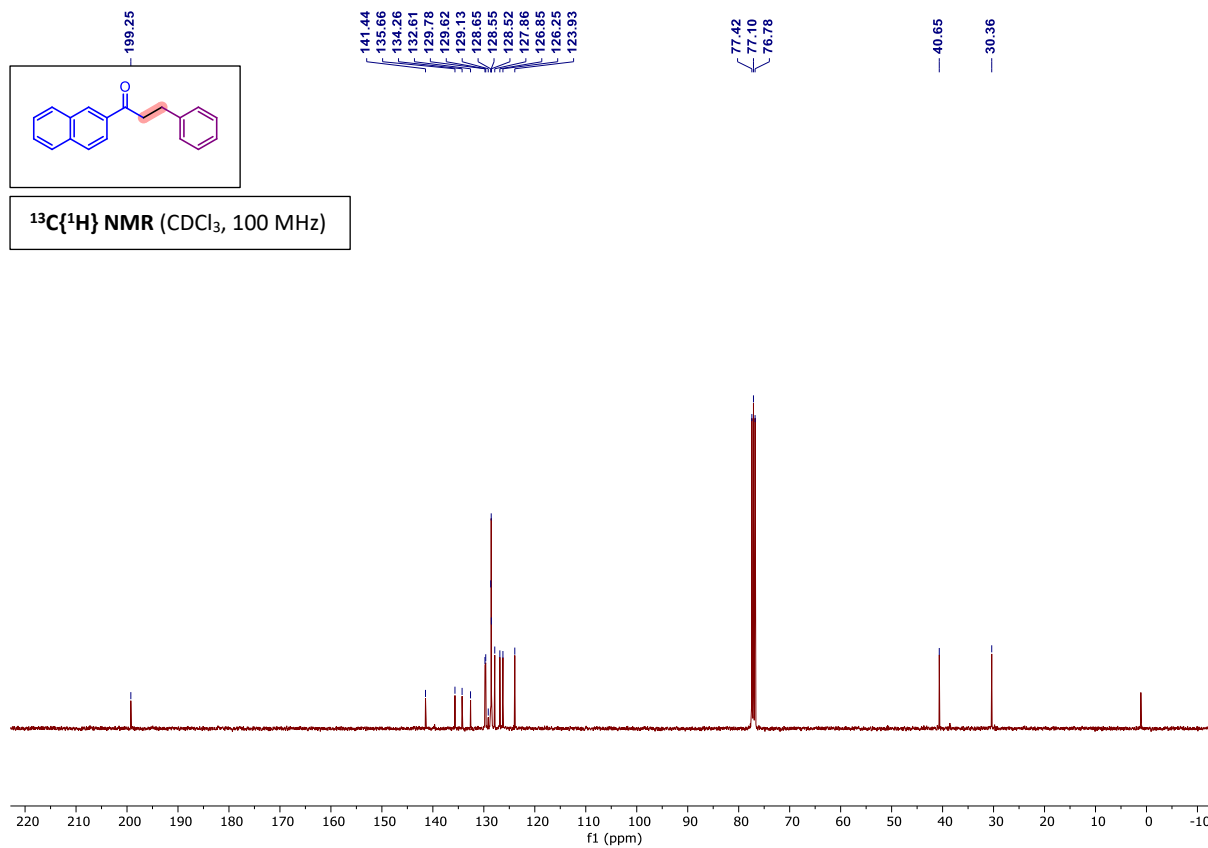



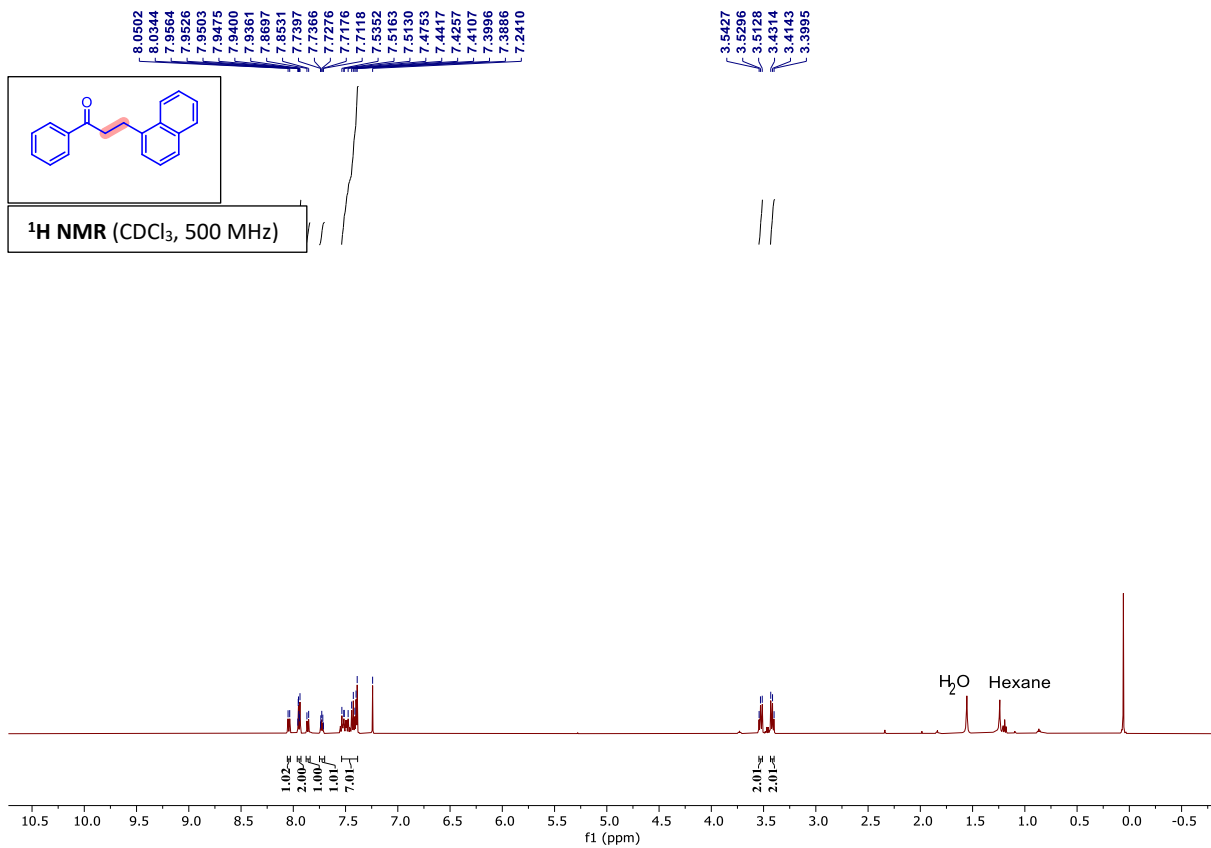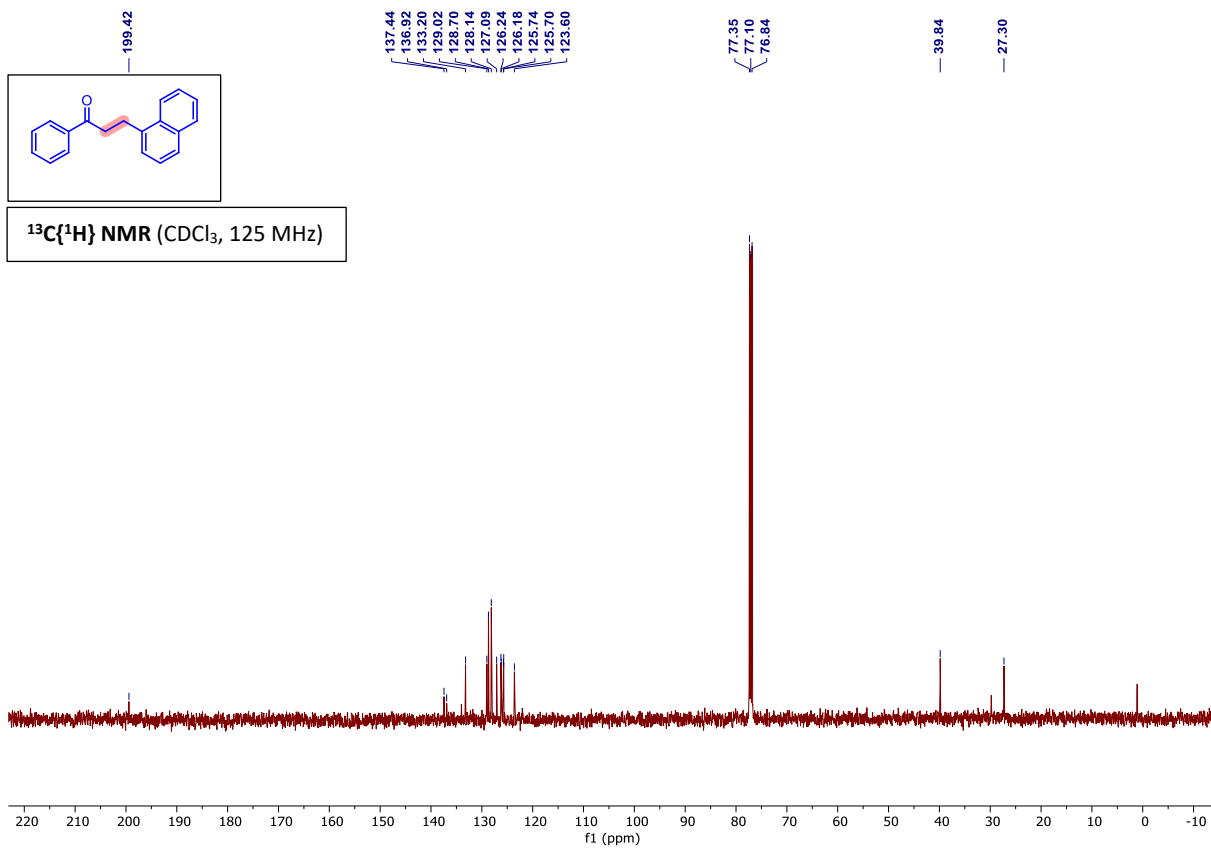

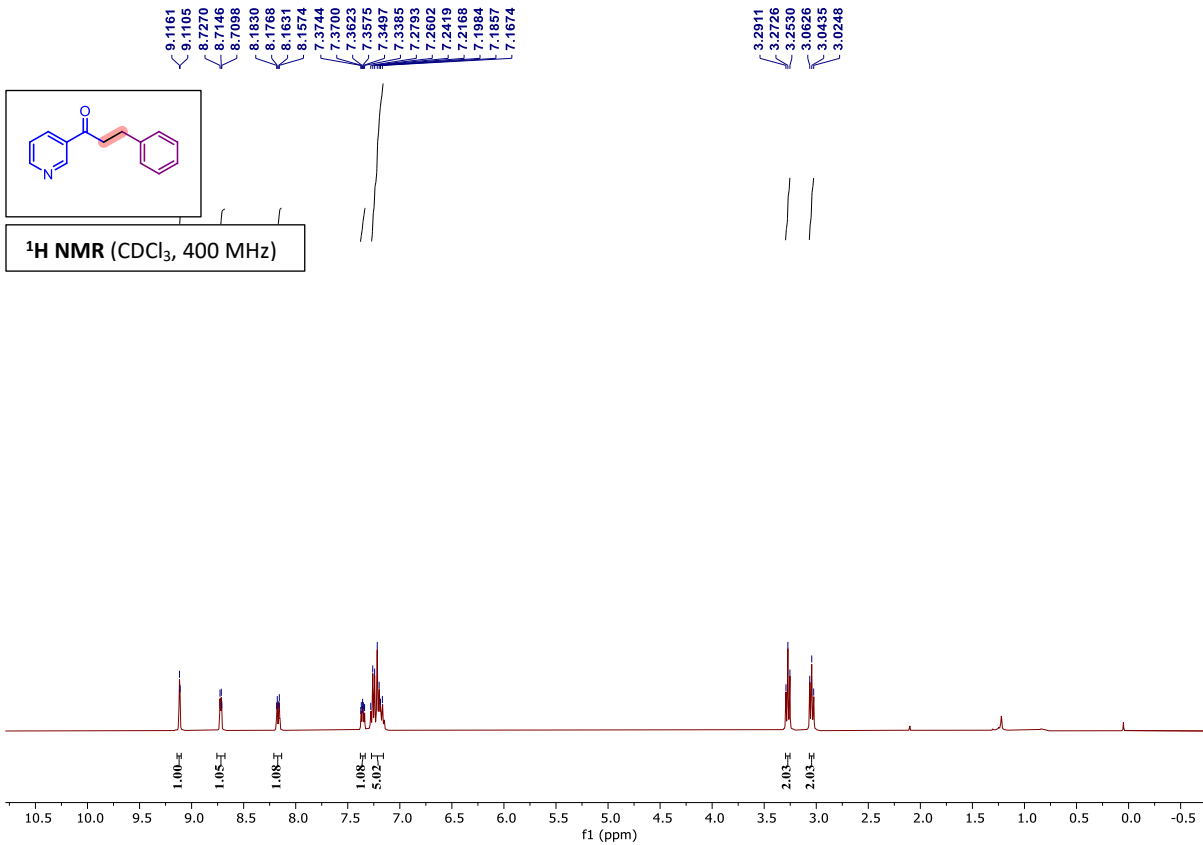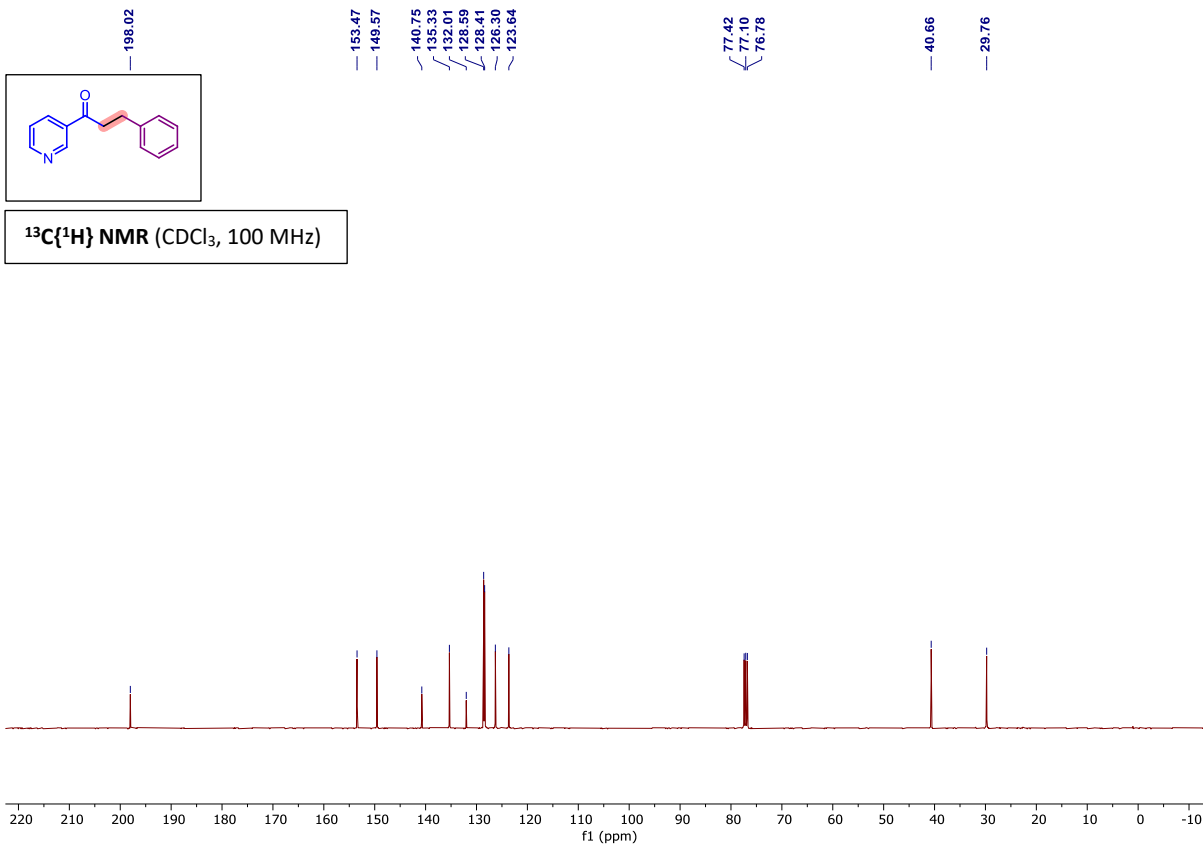

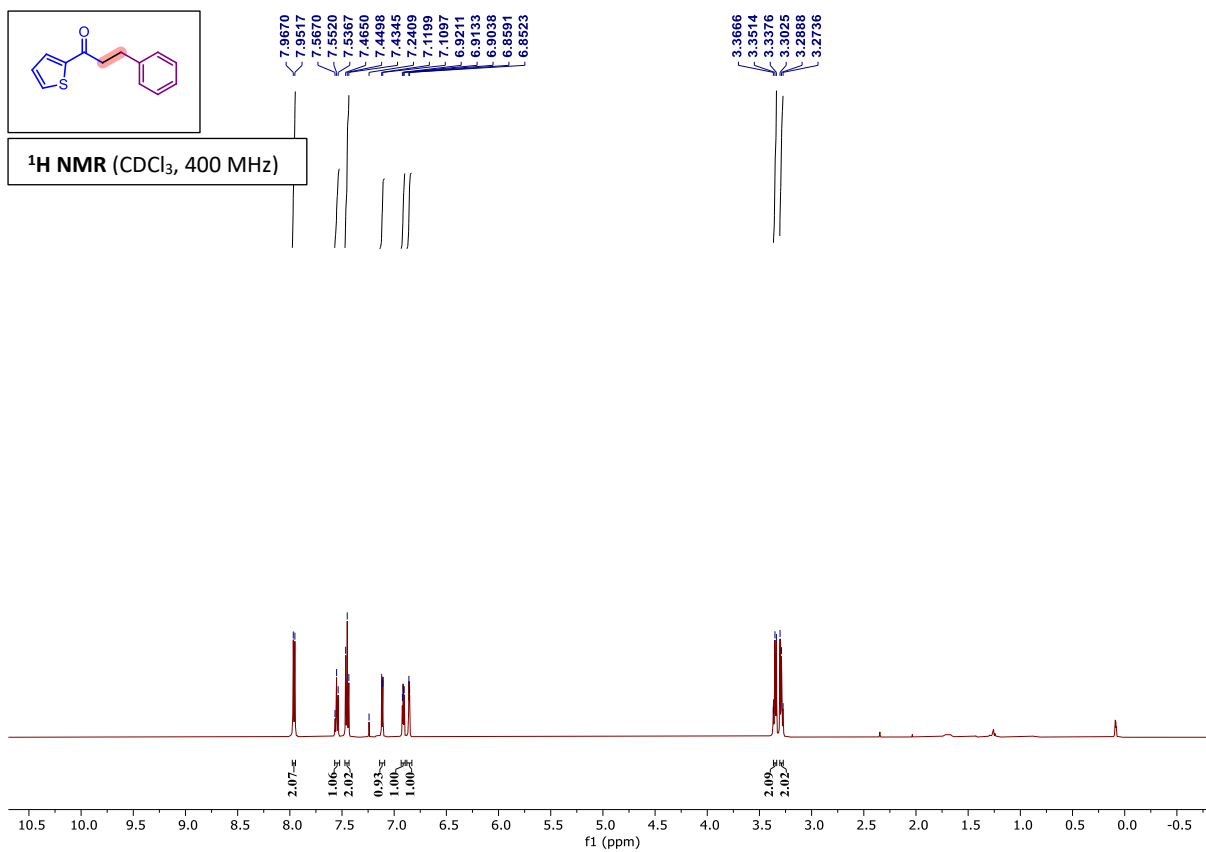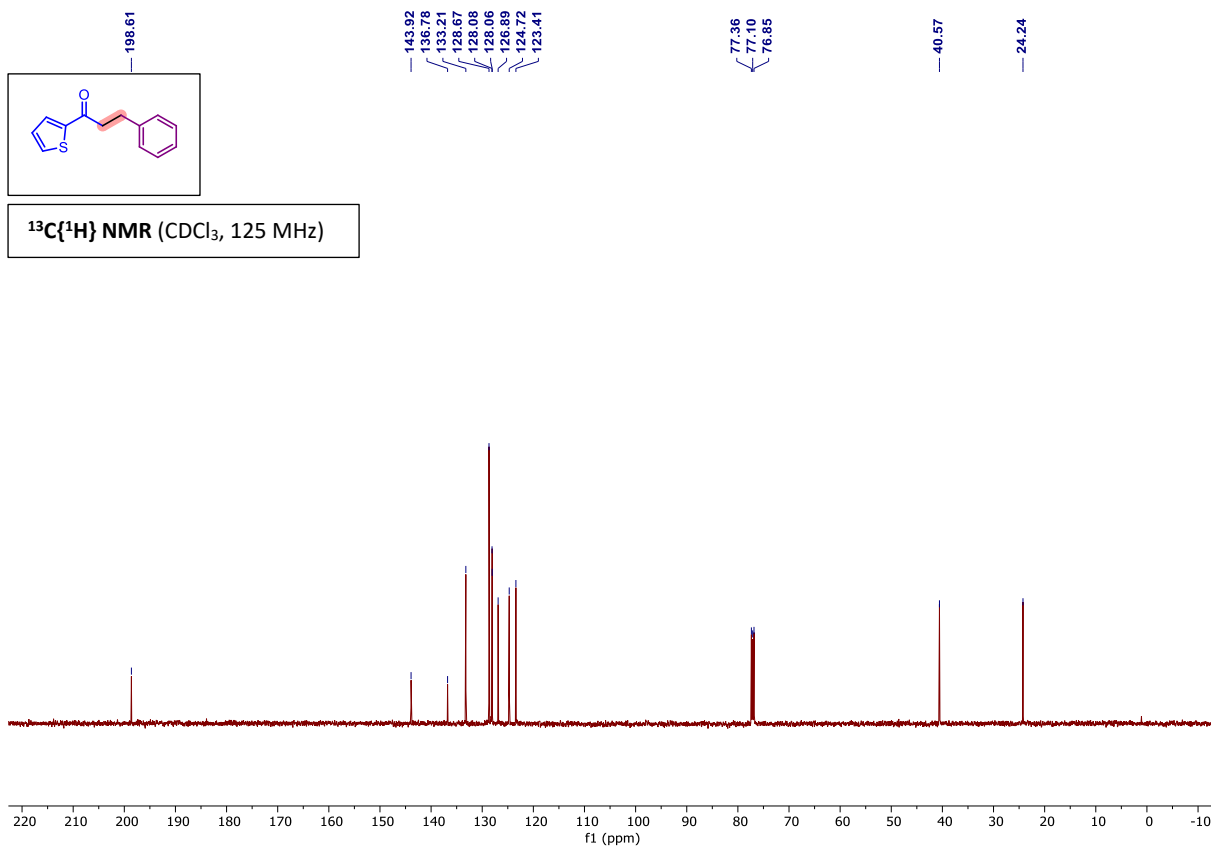

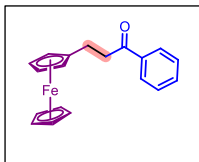

$^1\text{H NMR}$  ( $\text{CDCl}_3$ , 400 MHz)

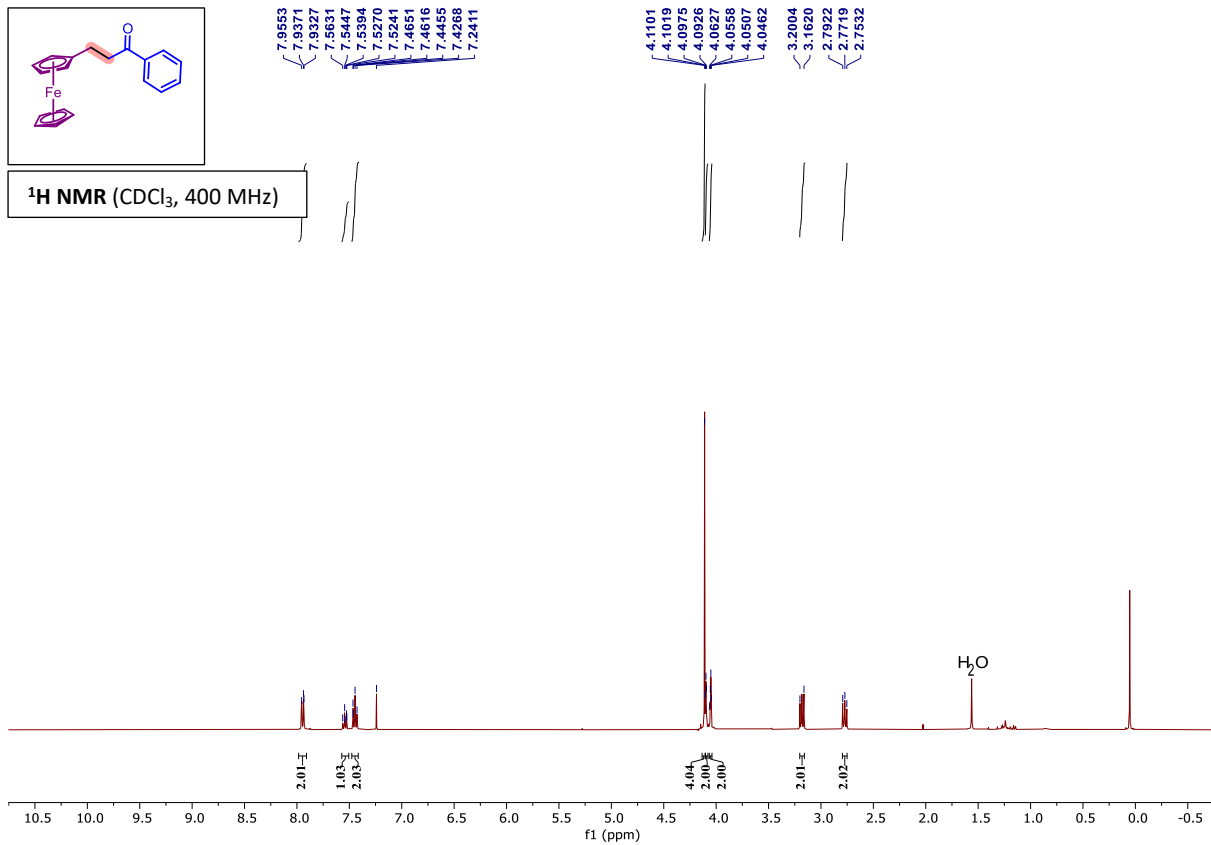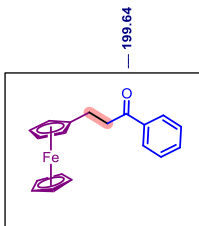

$^{13}\text{C}\{^1\text{H}\}$  NMR ( $\text{CDCl}_3$ , 100 MHz)

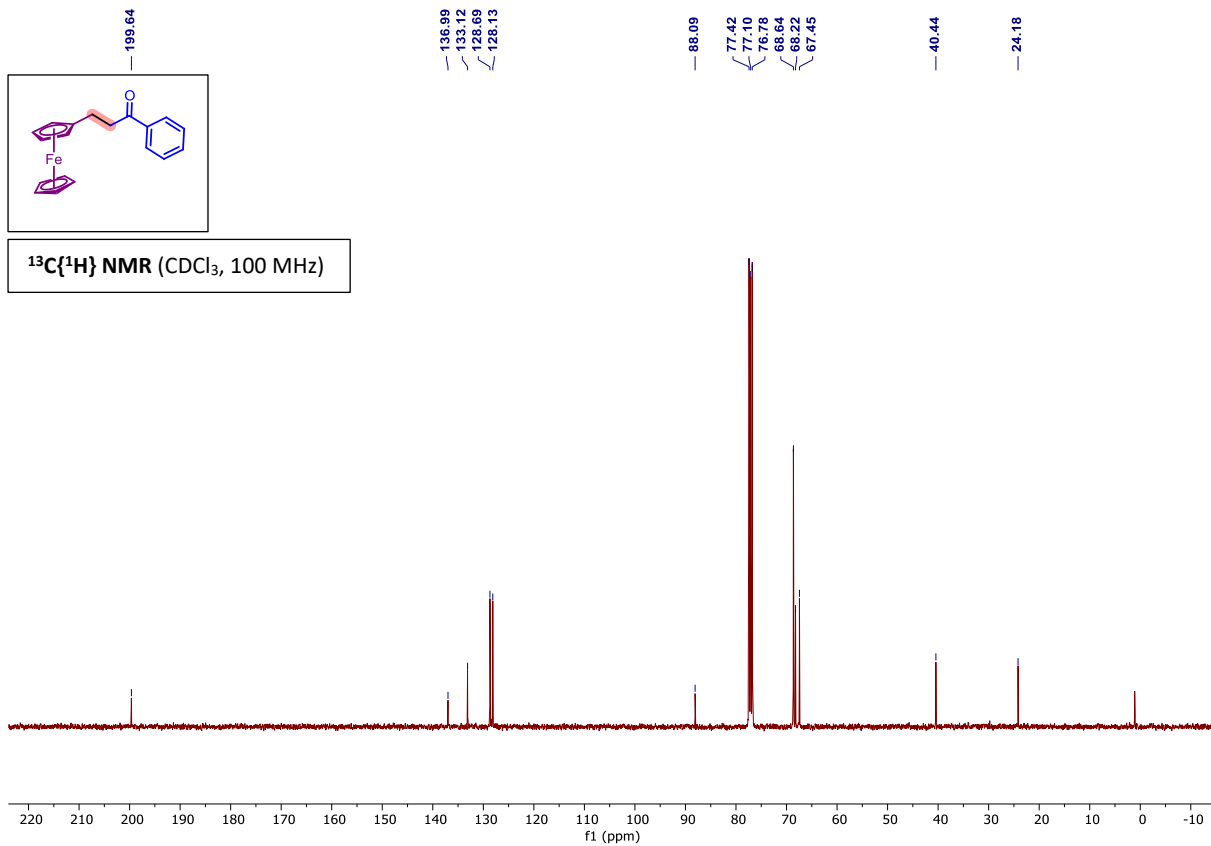

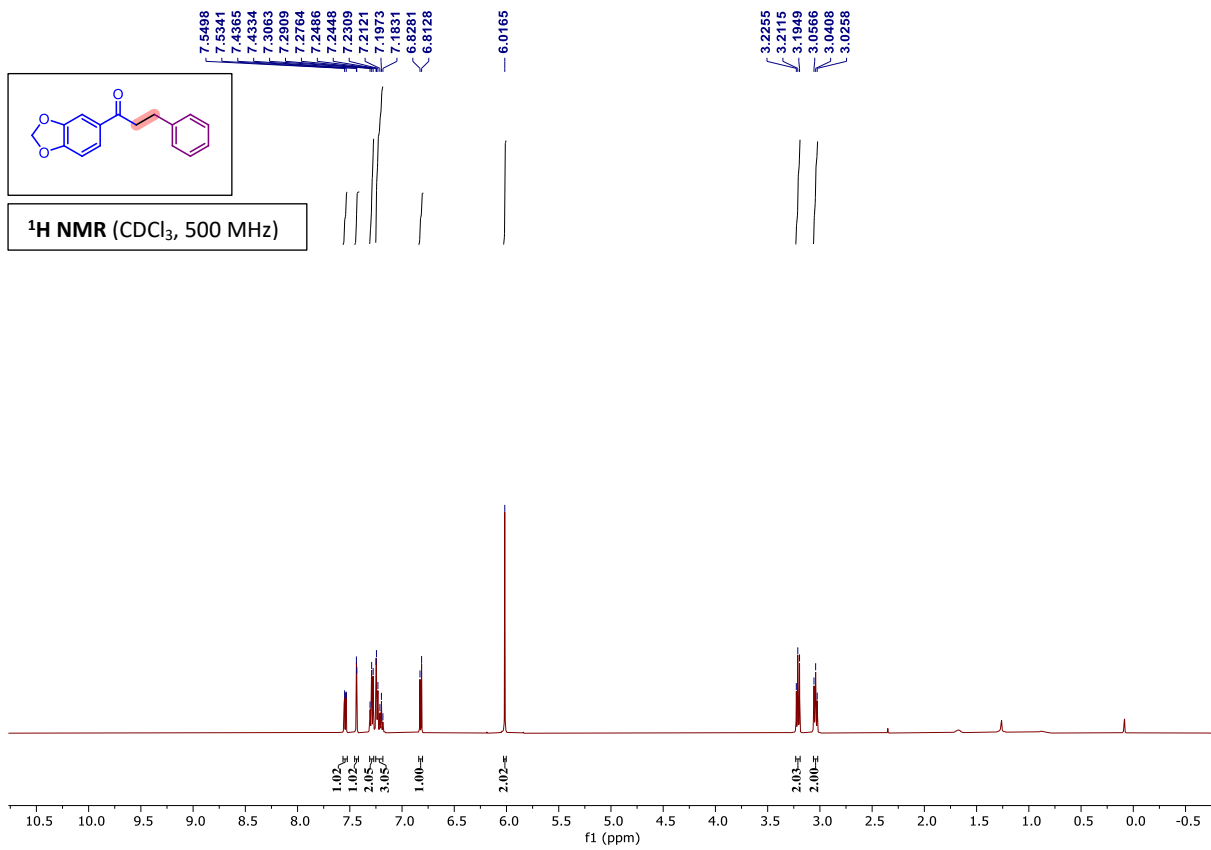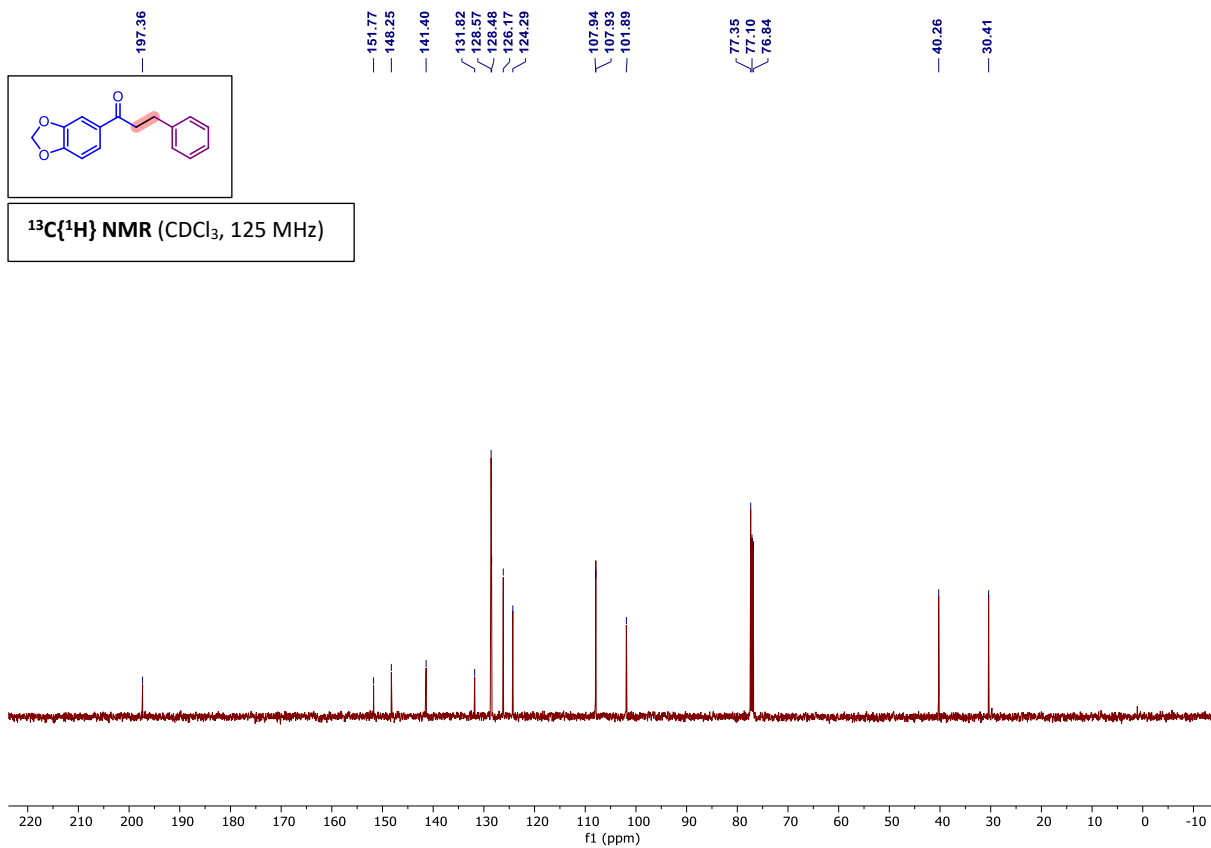

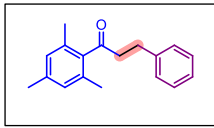

$^1\text{H NMR}$  ( $\text{CDCl}_3$ , 400 MHz)

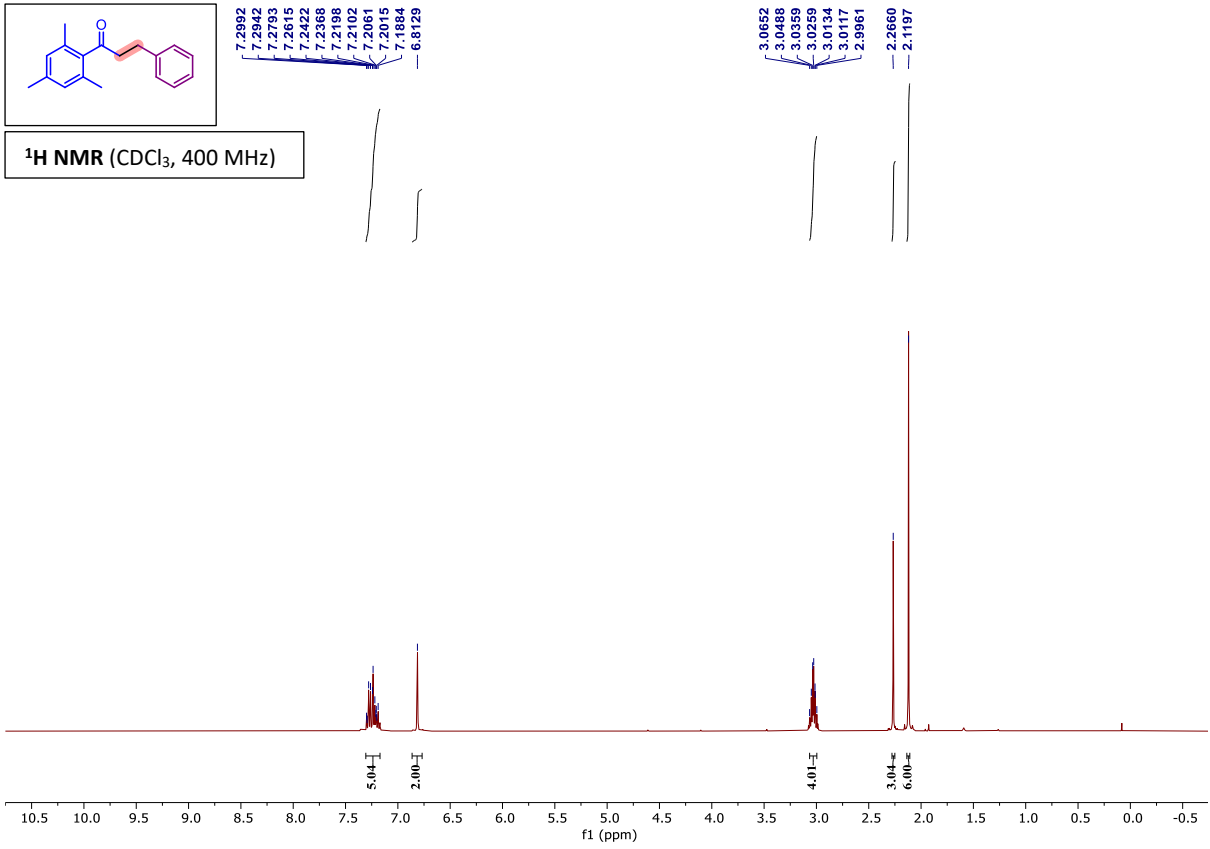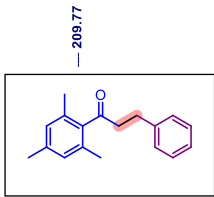

$^{13}\text{C}\{^1\text{H}\}$  NMR ( $\text{CDCl}_3$ , 100 MHz)

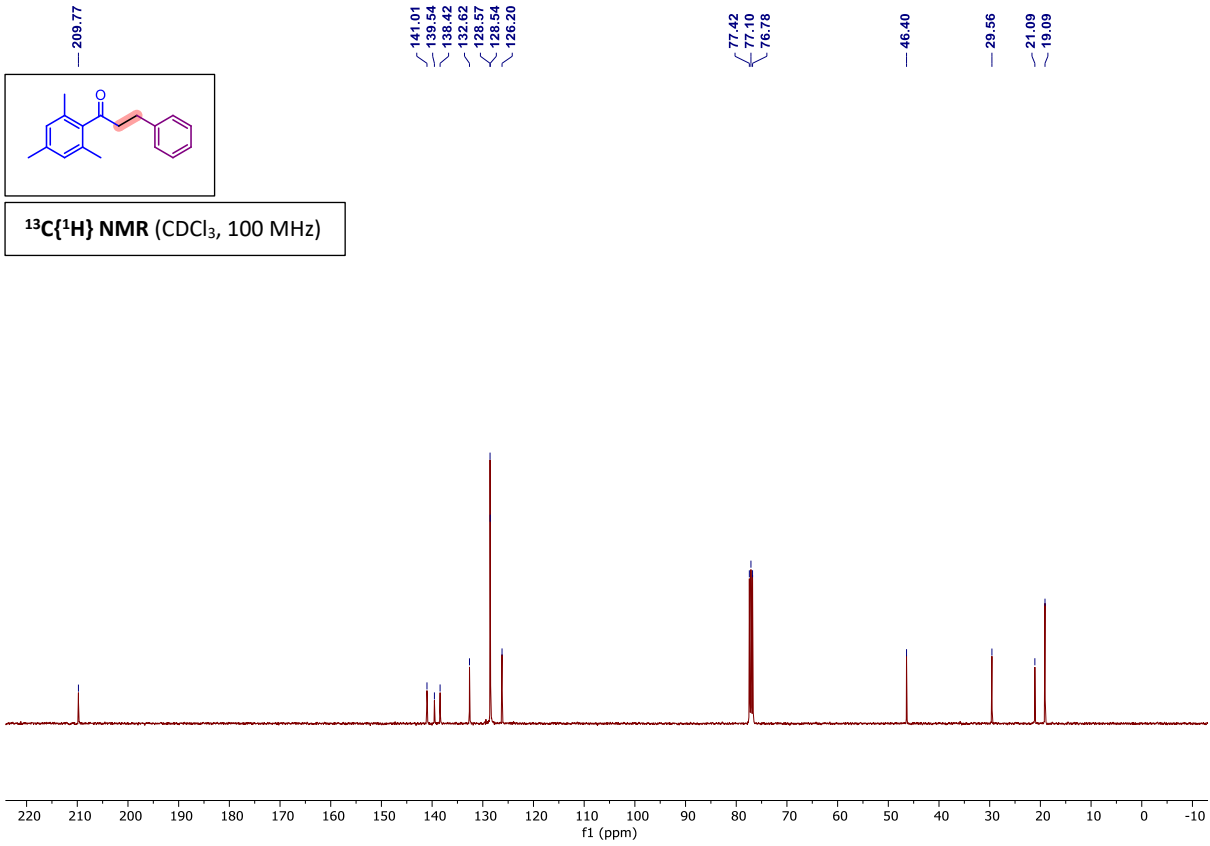

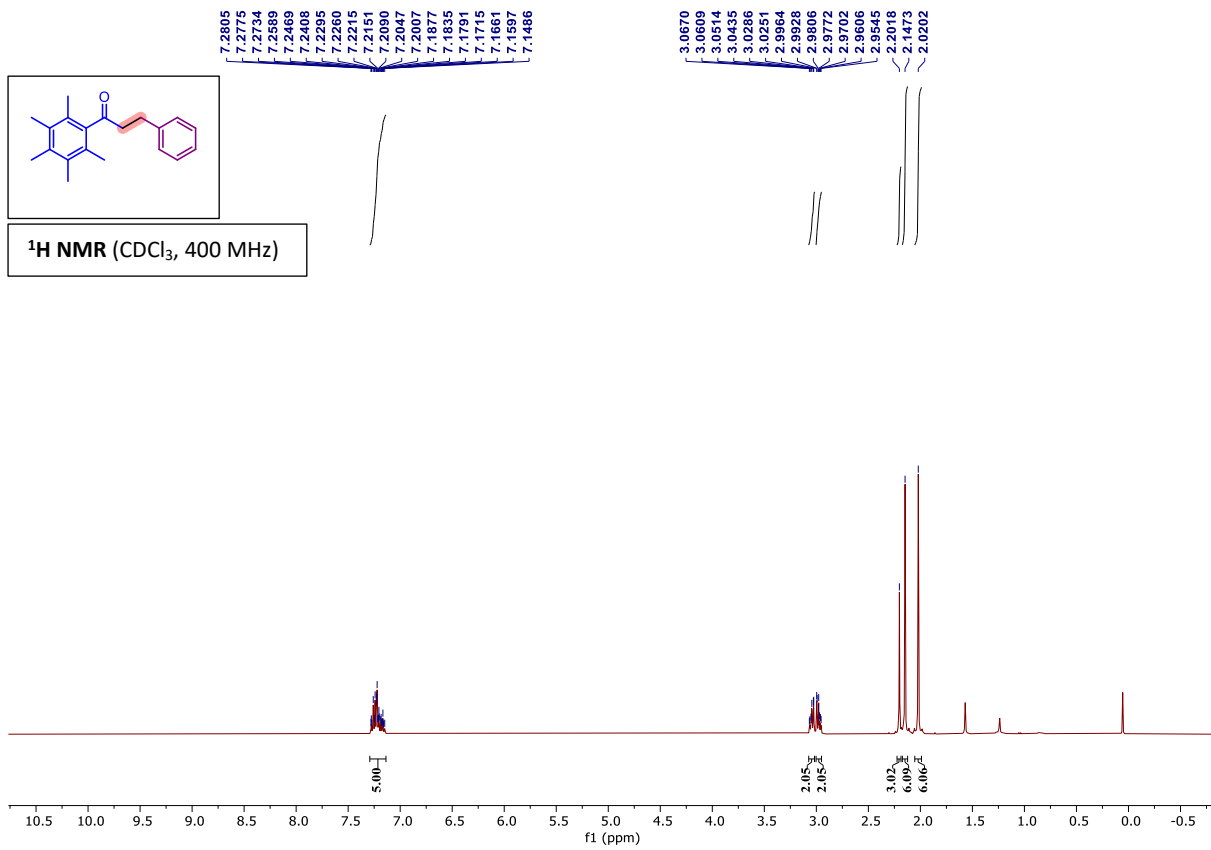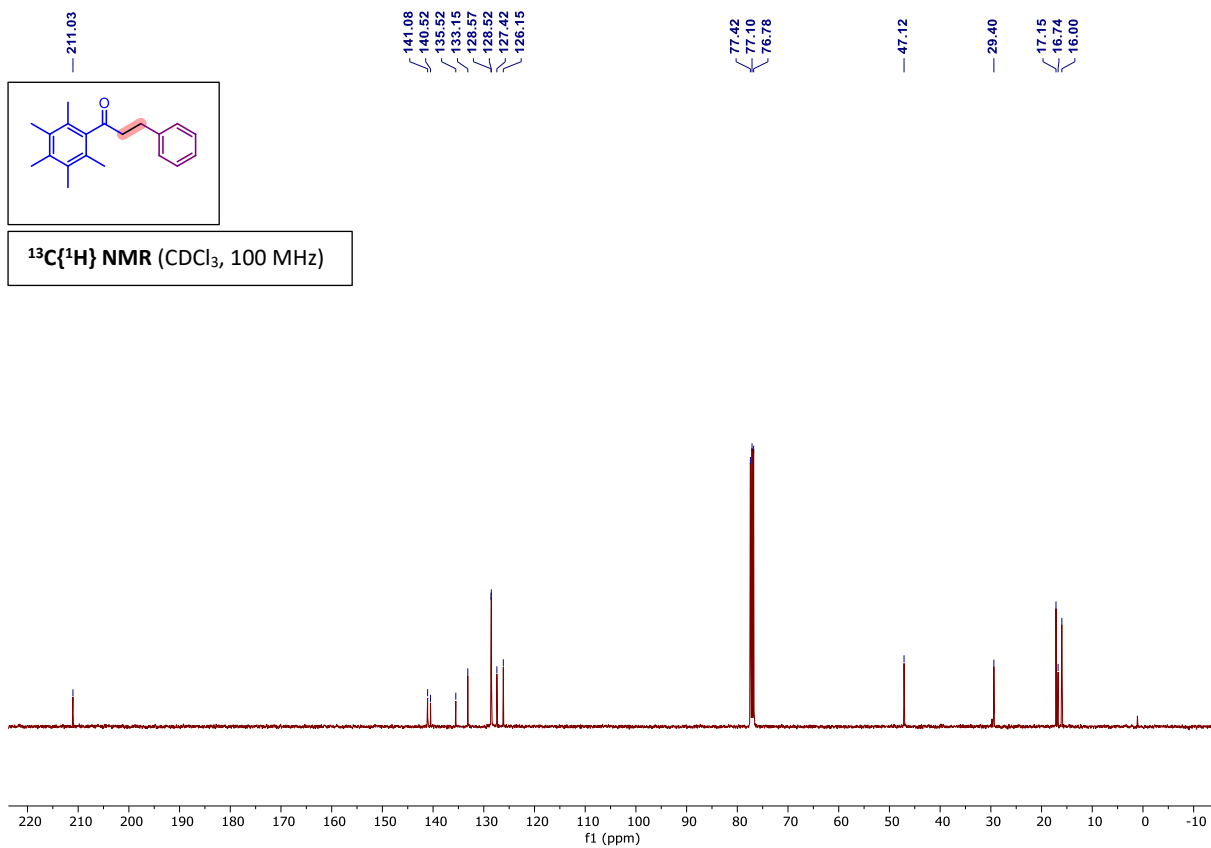

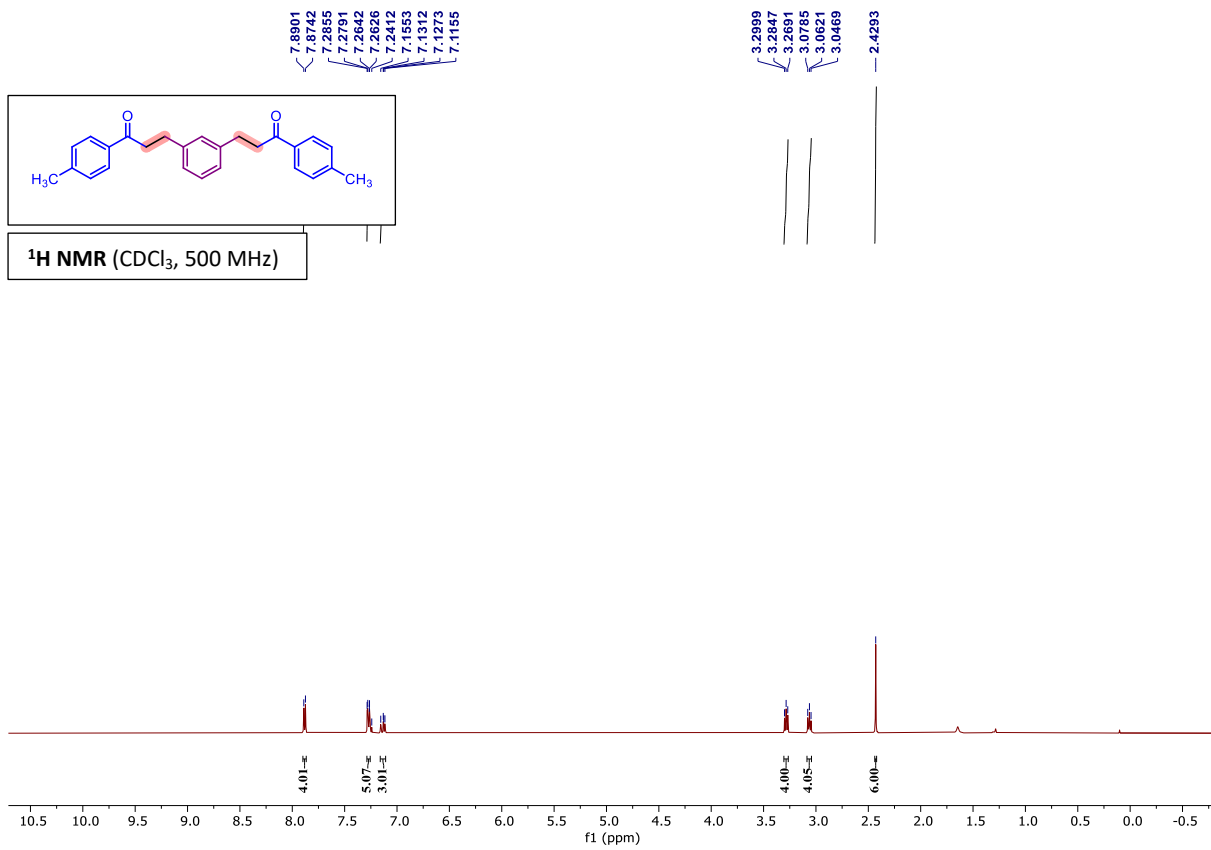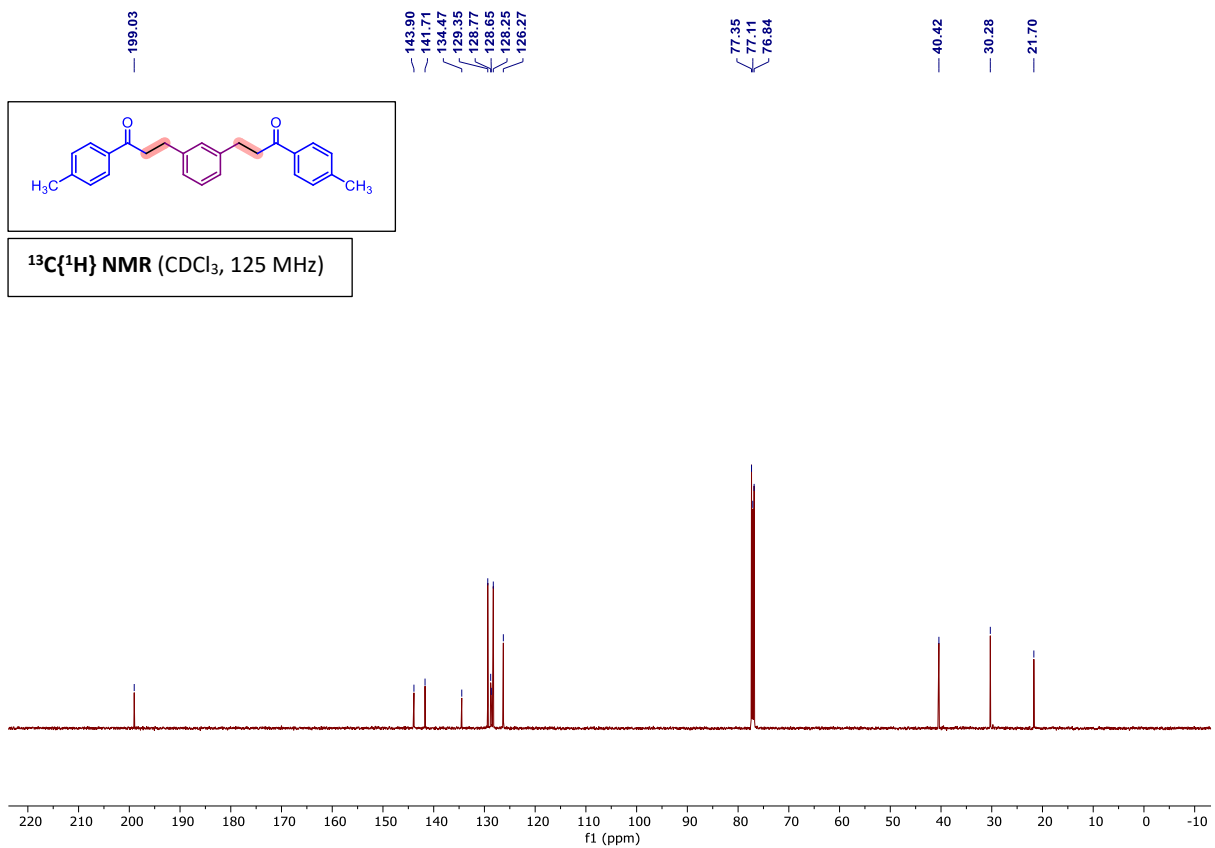



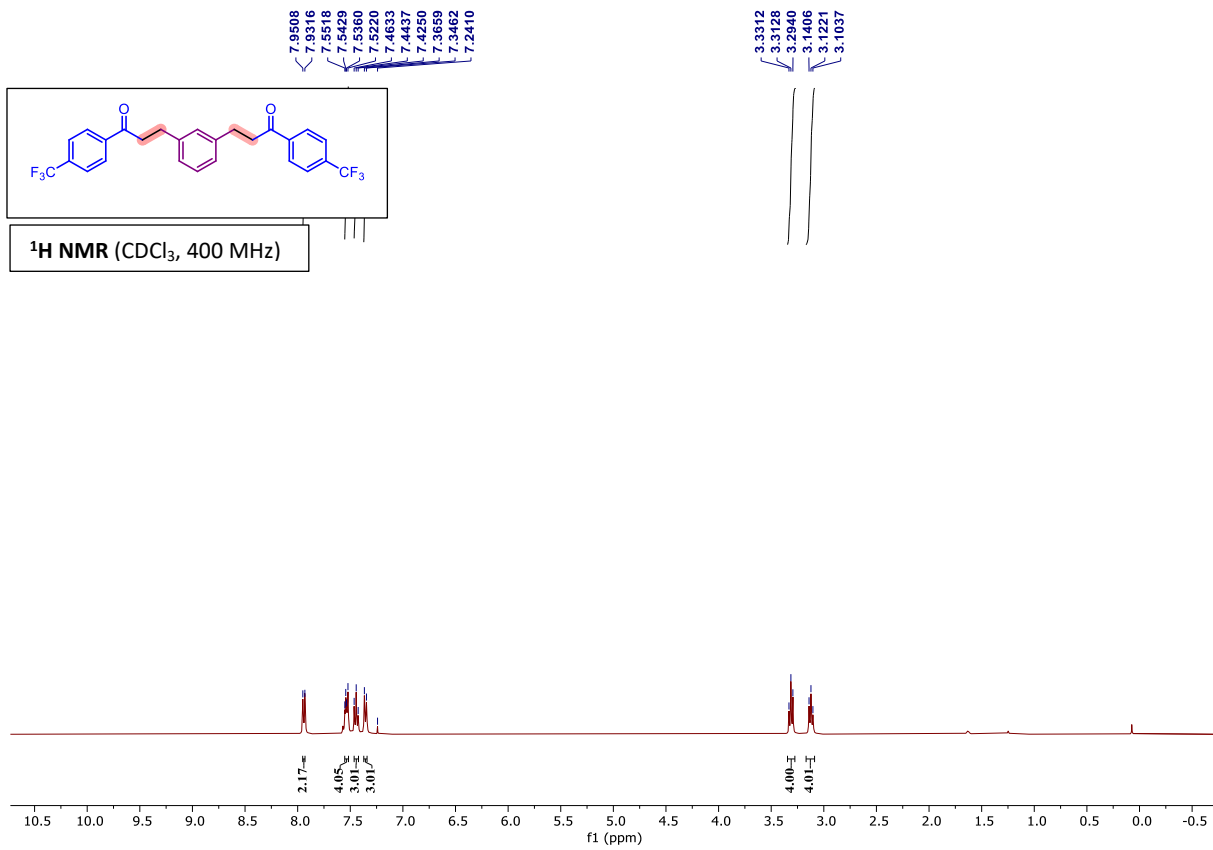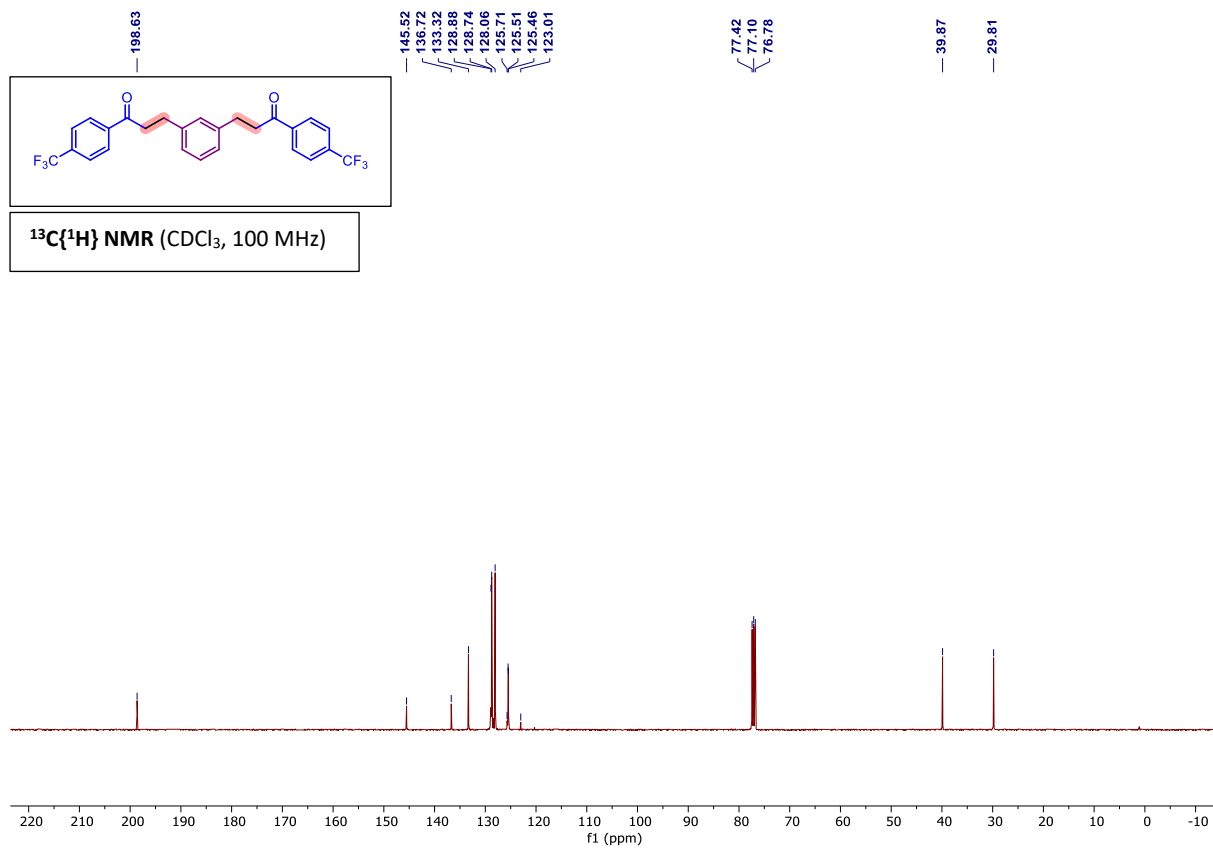

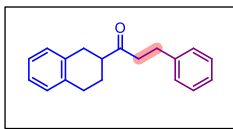

<sup>1</sup>H NMR (CDCl<sub>3</sub>, 400 MHz)

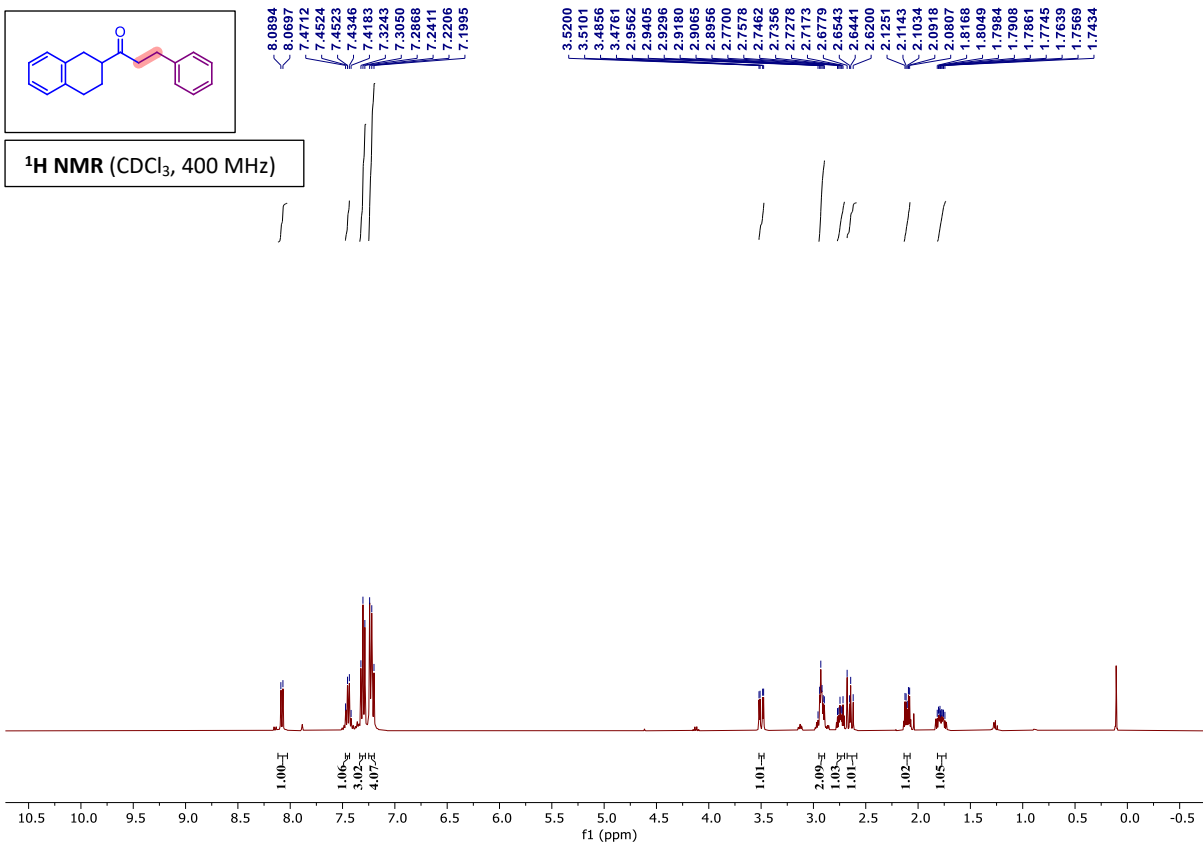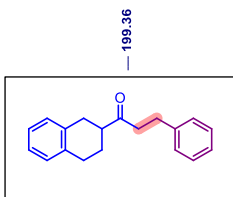

<sup>13</sup>C{<sup>1</sup>H} NMR (CDCl<sub>3</sub>, 100 MHz)

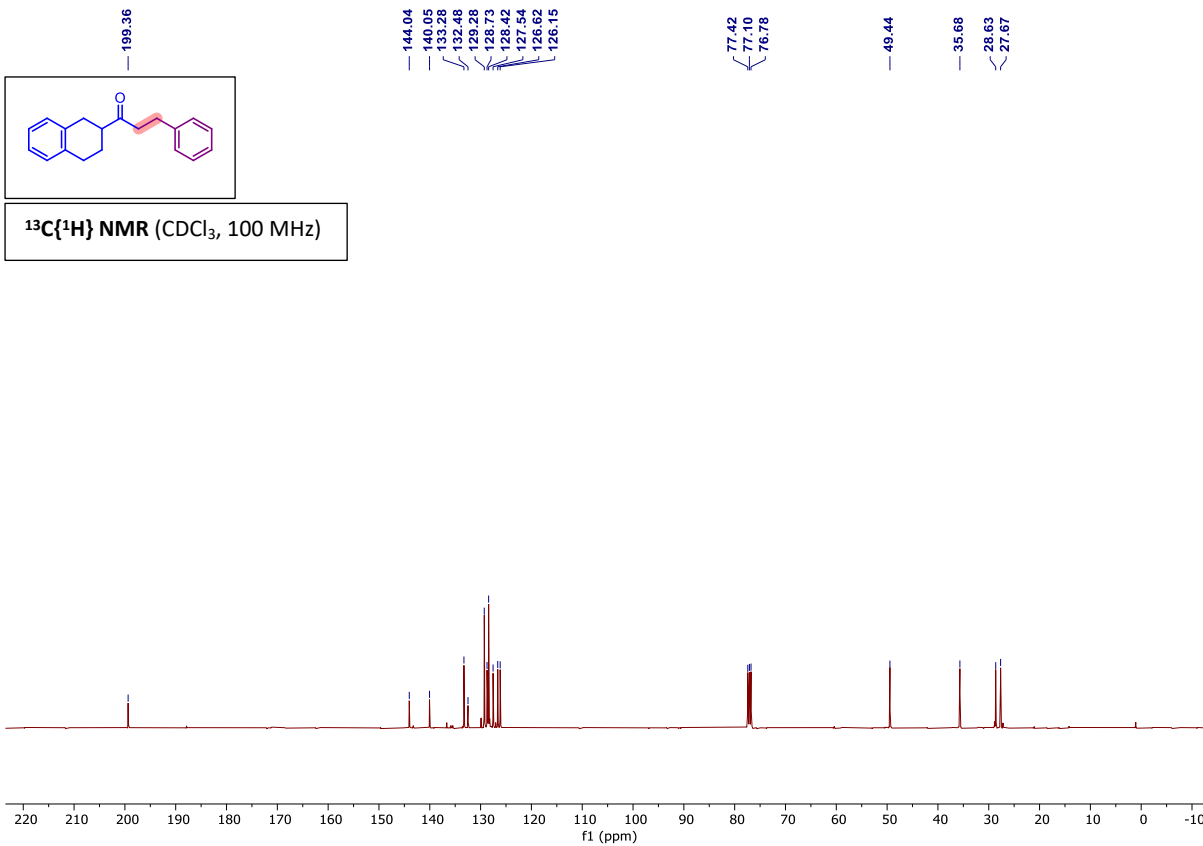

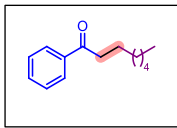

$^1\text{H NMR}$  ( $\text{CDCl}_3$ , 400 MHz)

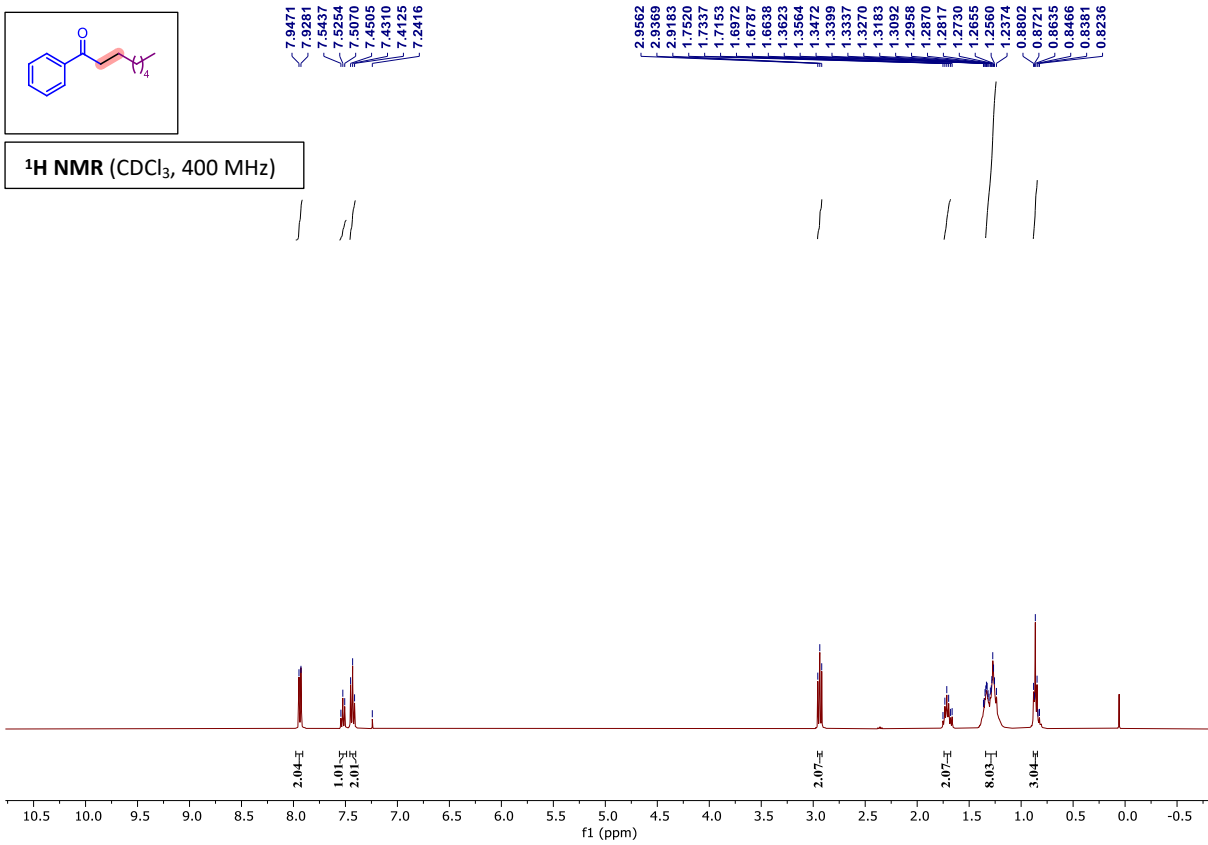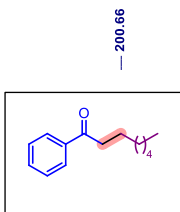

$^{13}\text{C}\{^1\text{H}\}$  NMR ( $\text{CDCl}_3$ , 100 MHz)

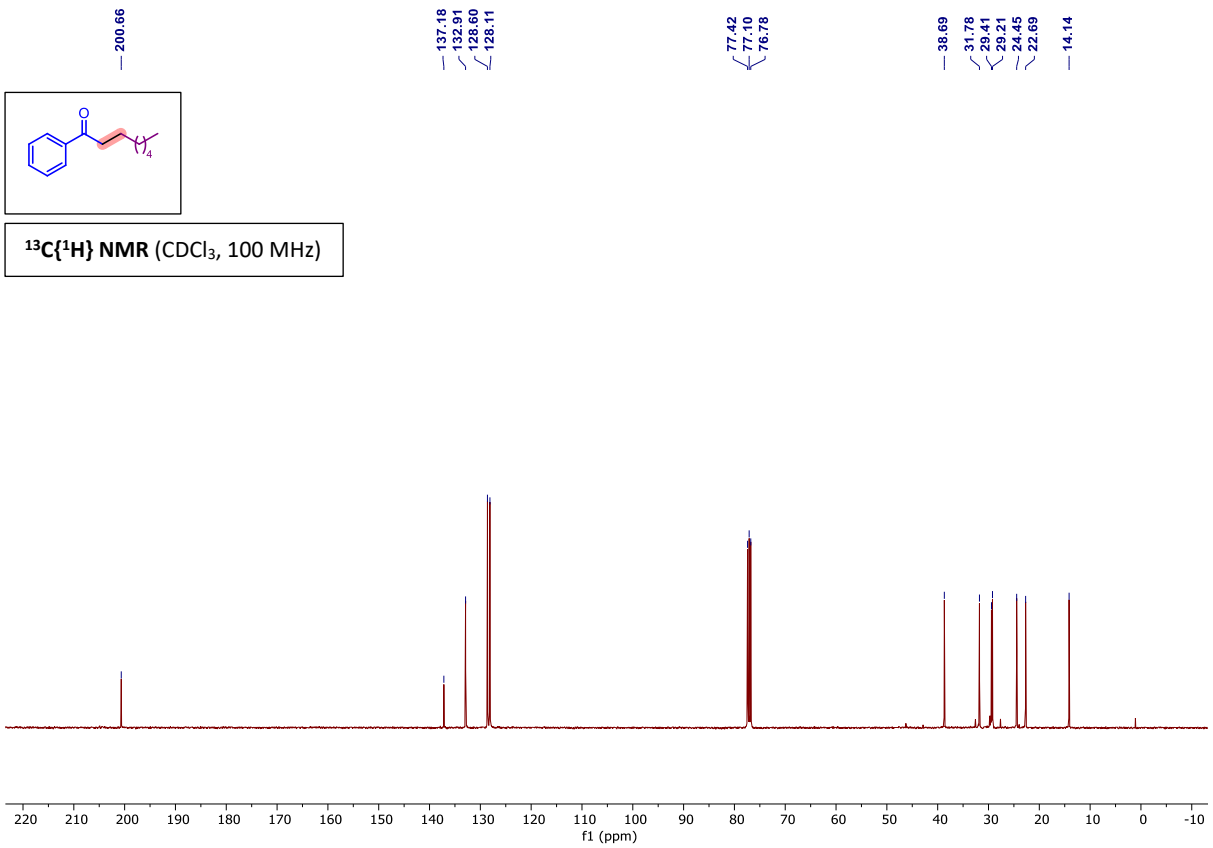

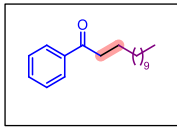

<sup>1</sup>H NMR (CDCl<sub>3</sub>, 400 MHz)

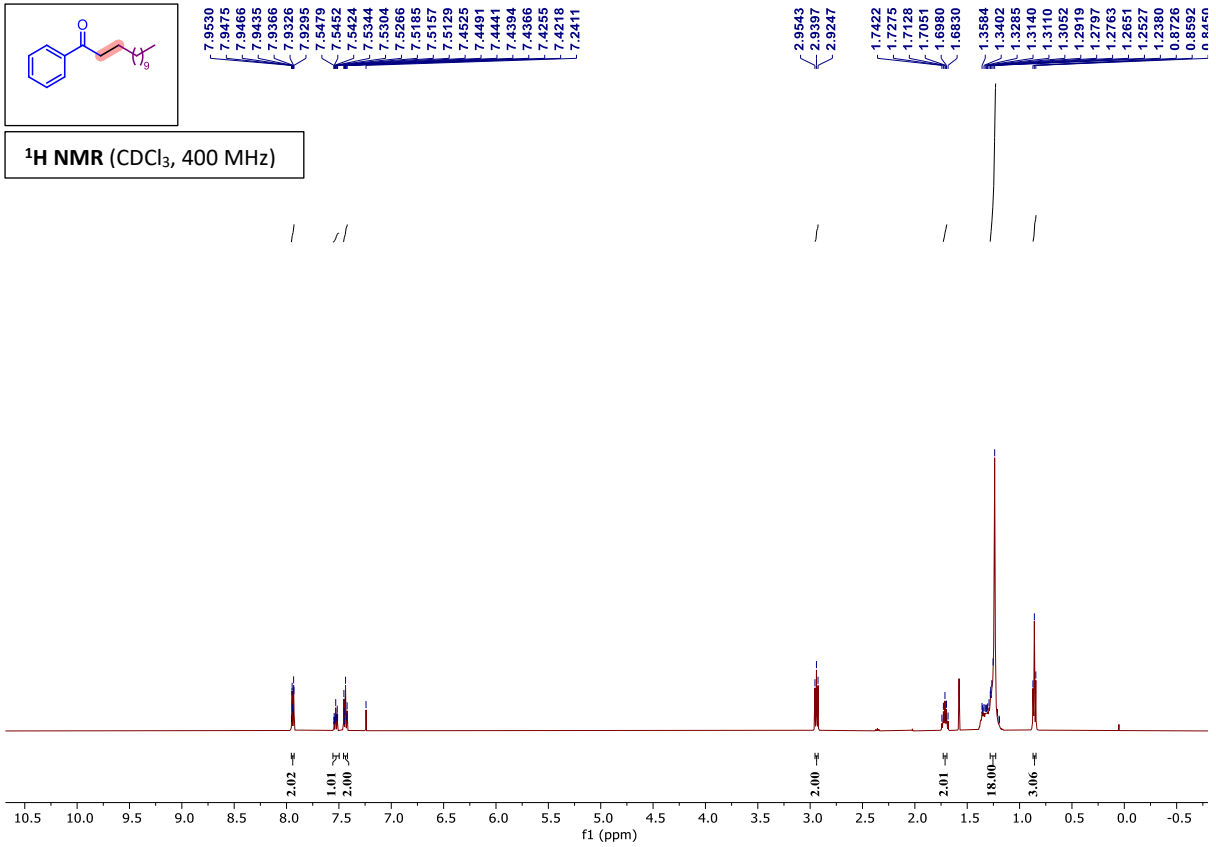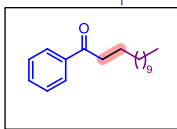

<sup>13</sup>C{<sup>1</sup>H} NMR (CDCl<sub>3</sub>, 100 MHz)

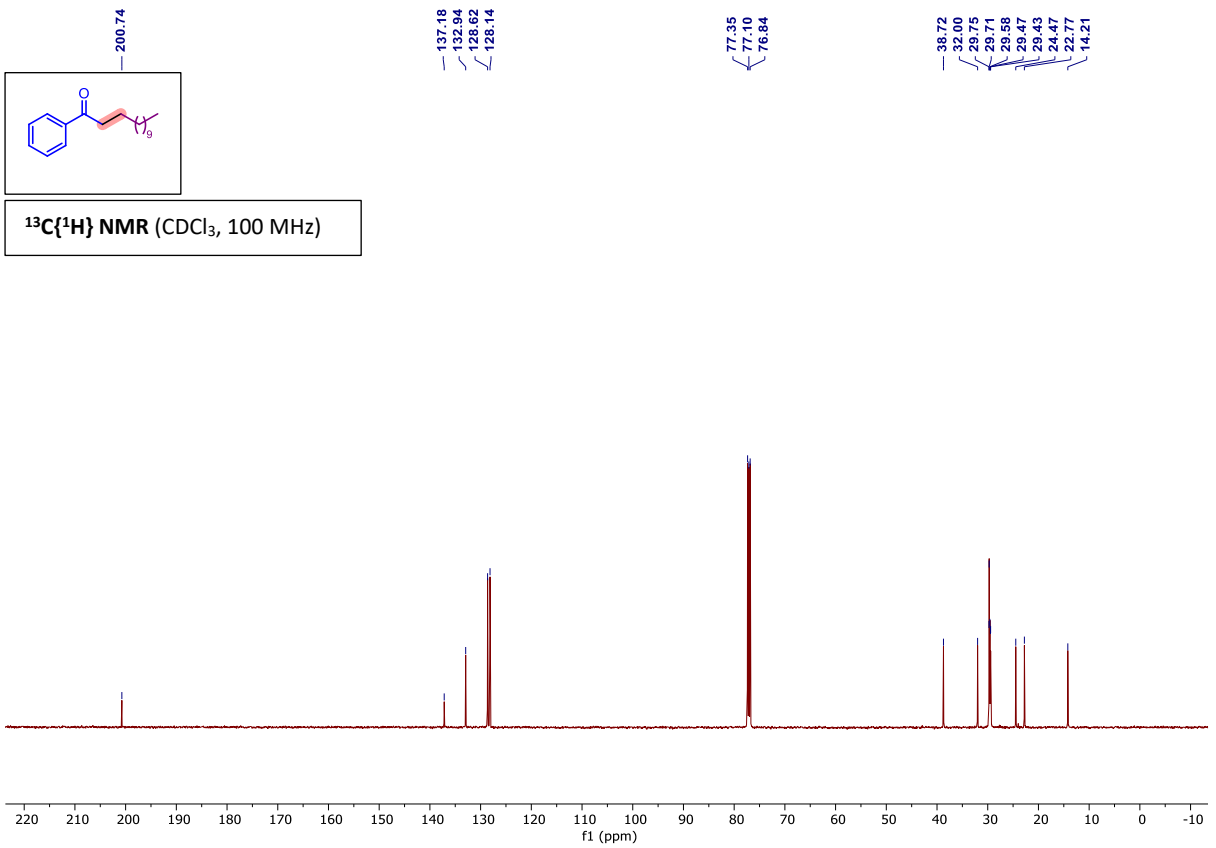

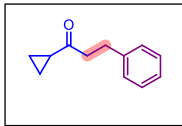

$^1\text{H NMR}$  ( $\text{CDCl}_3$ , 400 MHz)

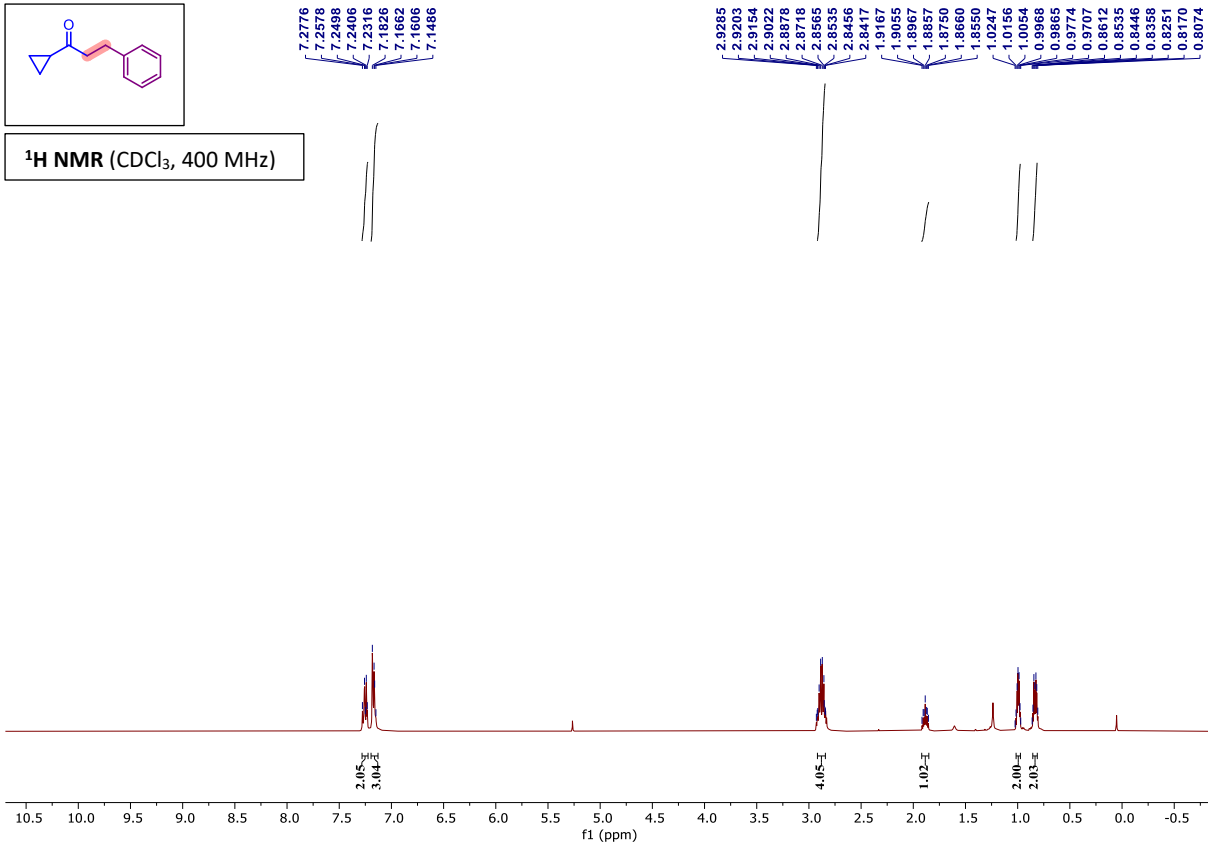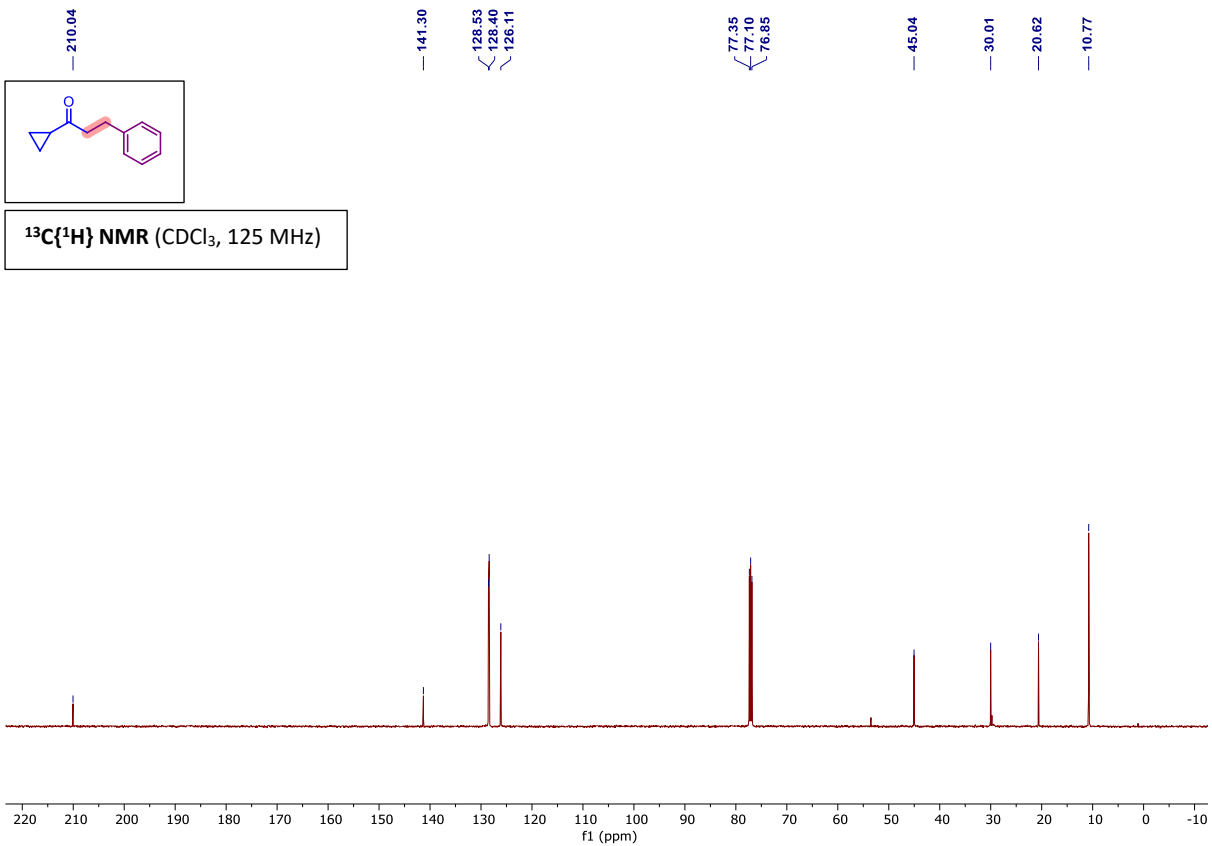

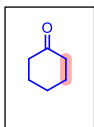

$^1\text{H}$  NMR ( $\text{CDCl}_3$ , 400 MHz)

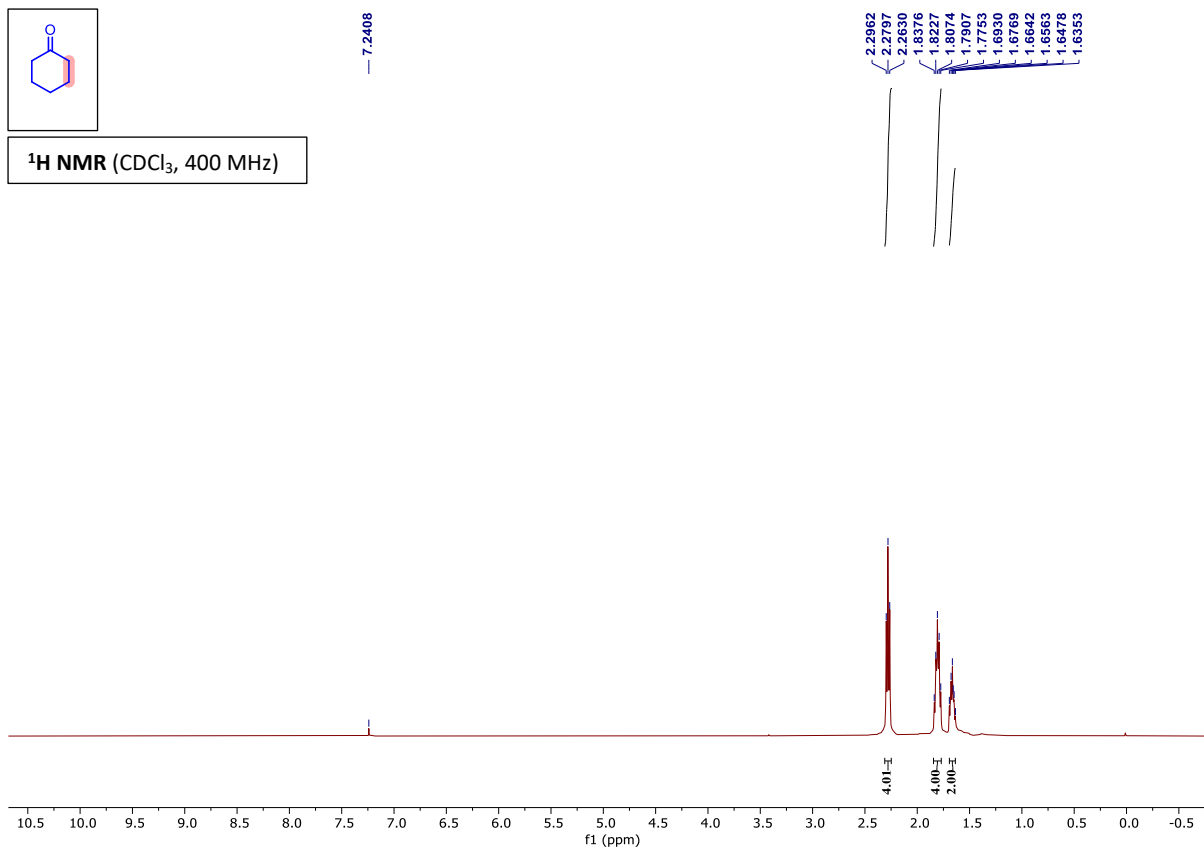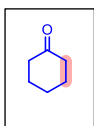

$^{13}\text{C}\{^1\text{H}\}$  NMR ( $\text{CDCl}_3$ , 100 MHz)

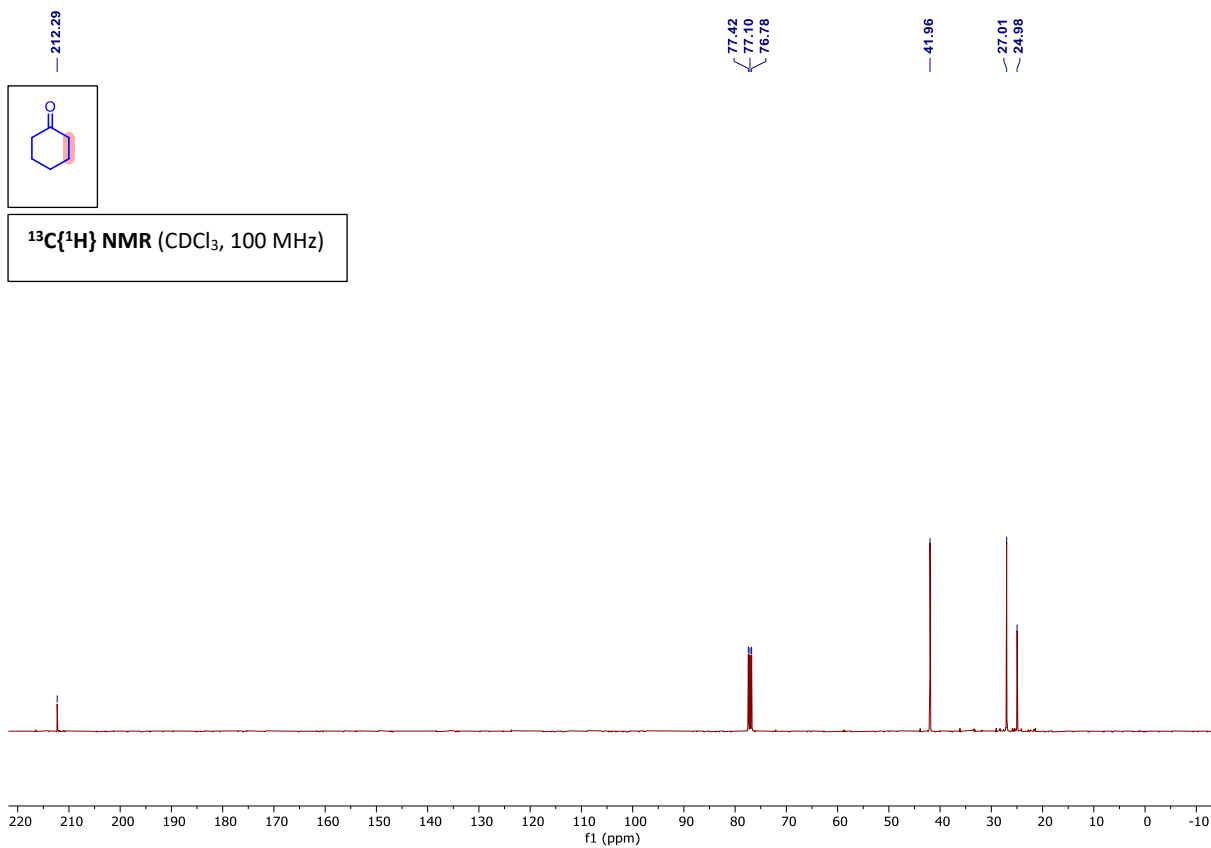

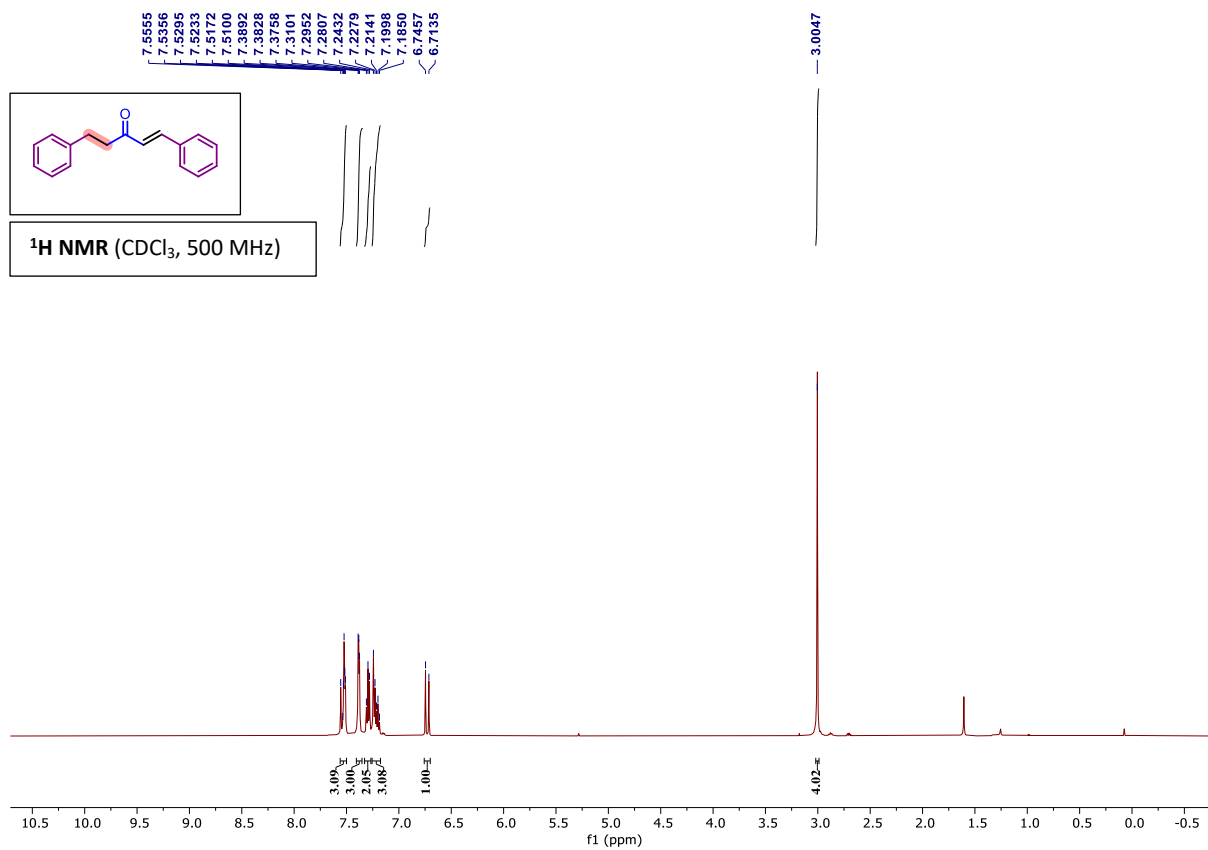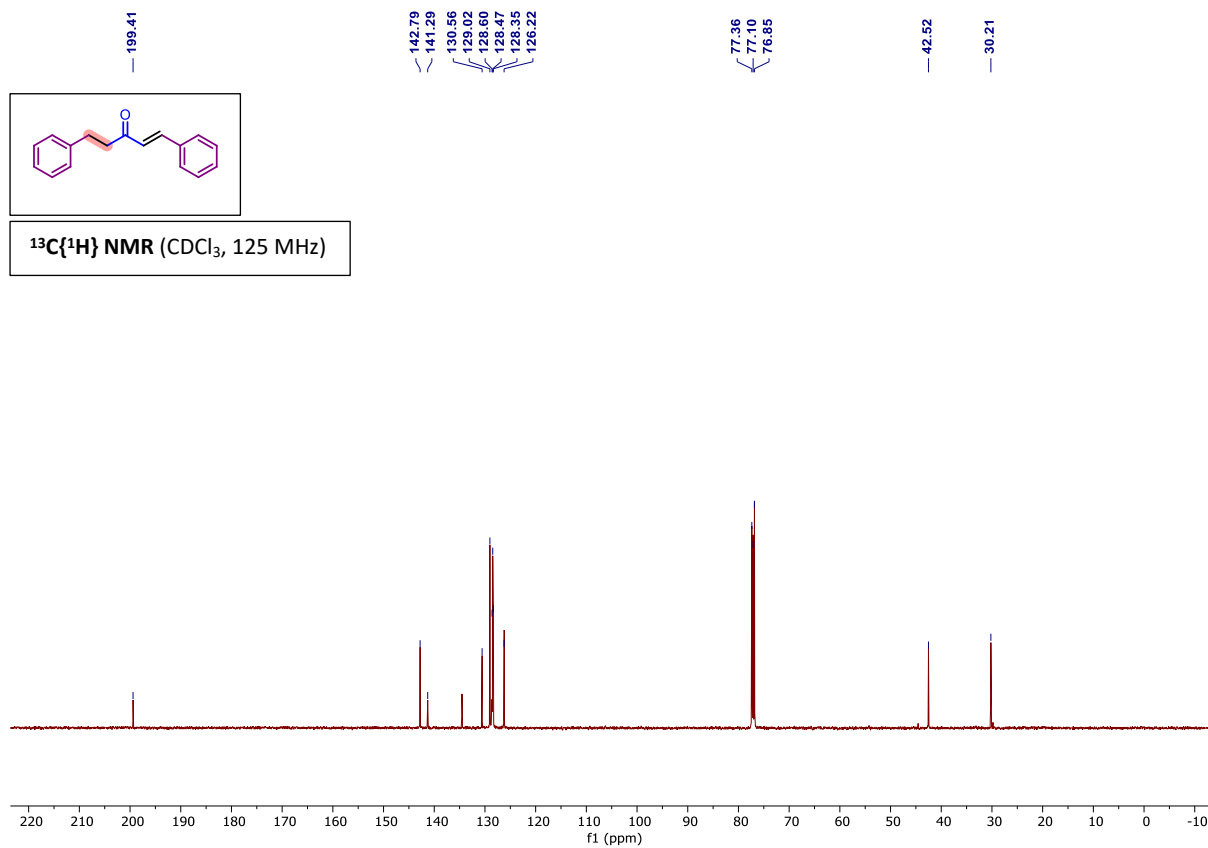

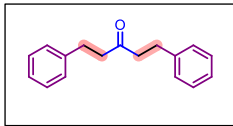

$^1\text{H NMR}$  ( $\text{CDCl}_3$ , 500 MHz)

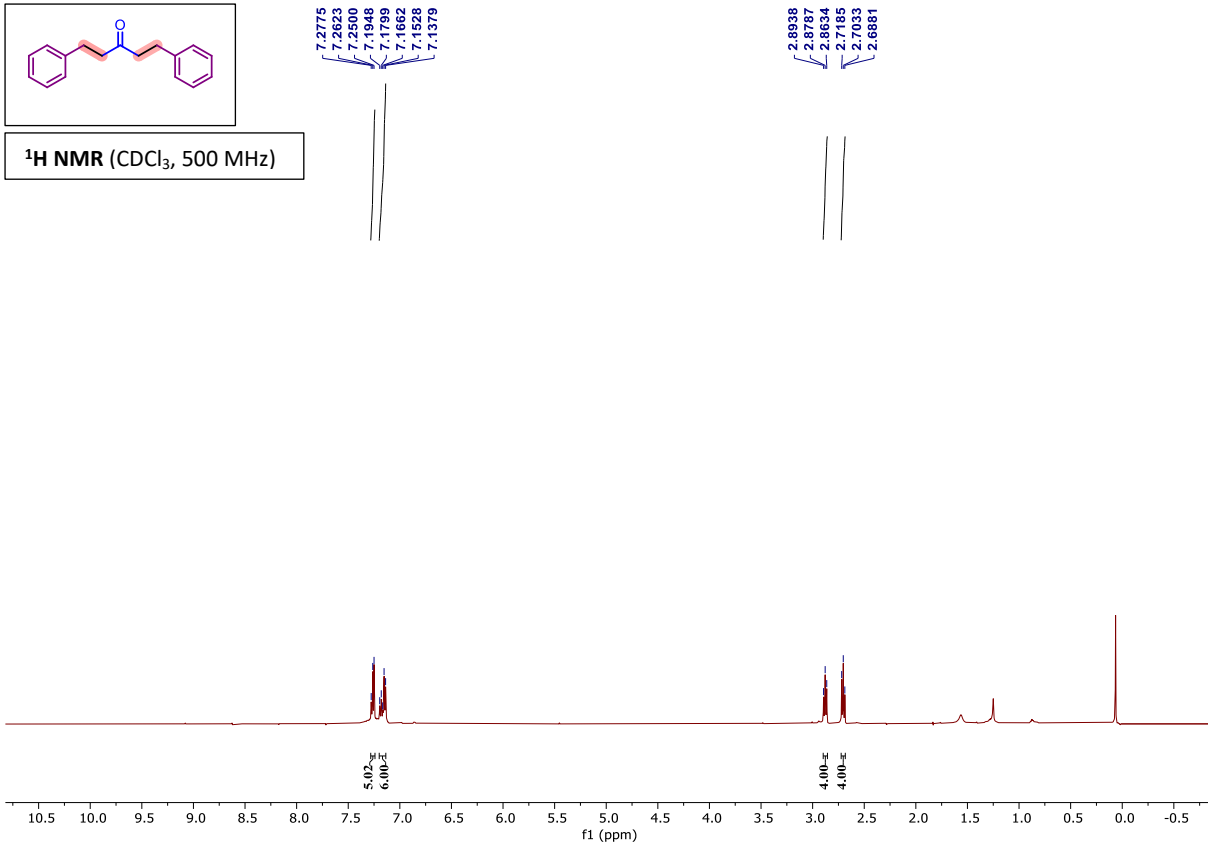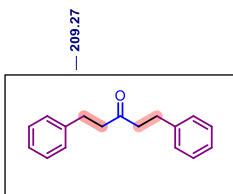

$^{13}\text{C}\{^1\text{H}\}$  NMR ( $\text{CDCl}_3$ , 125 MHz)

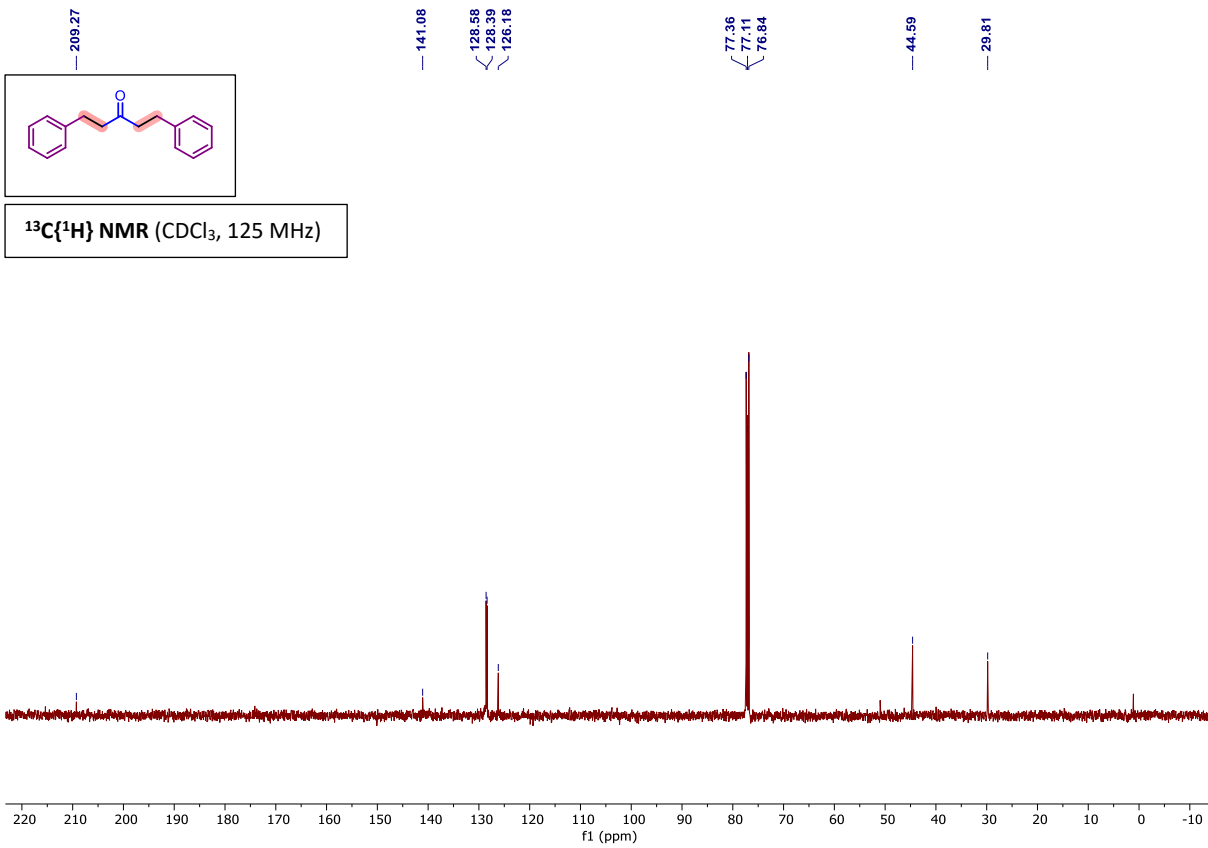



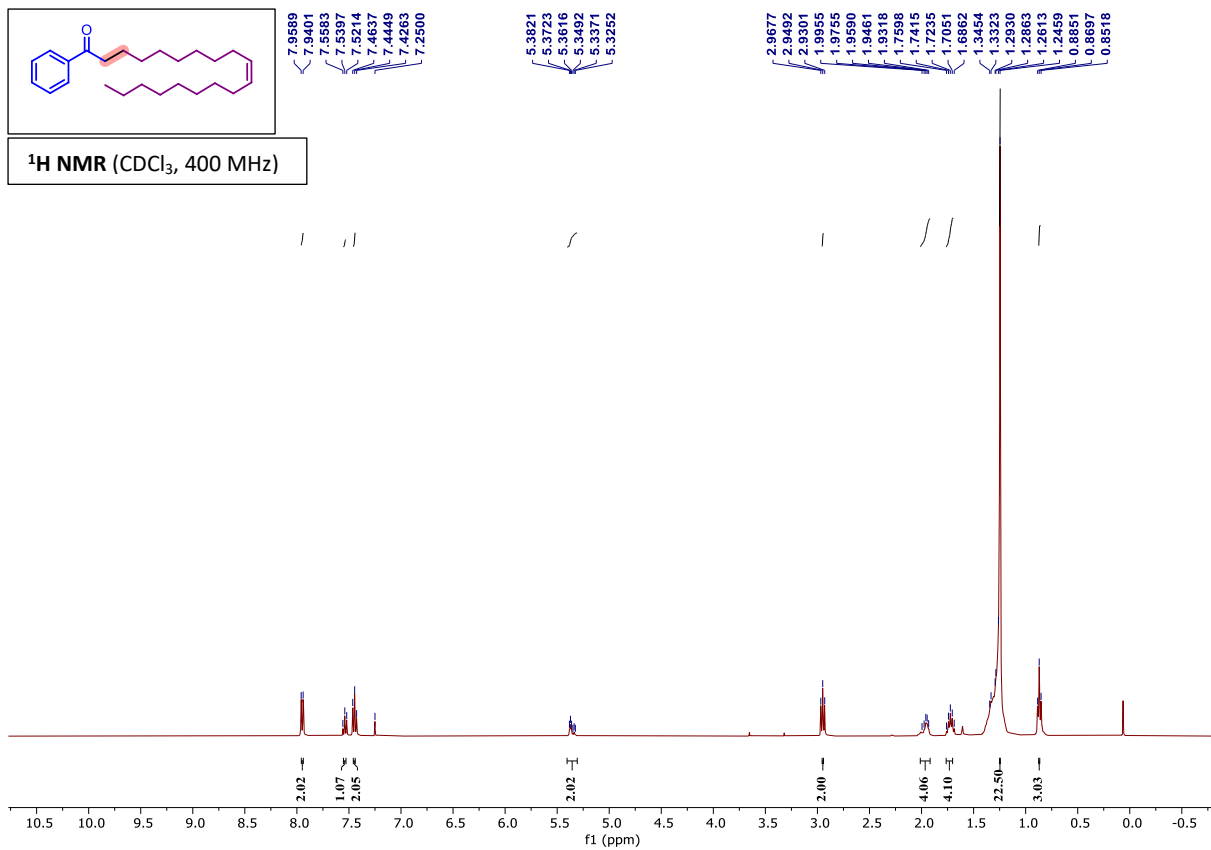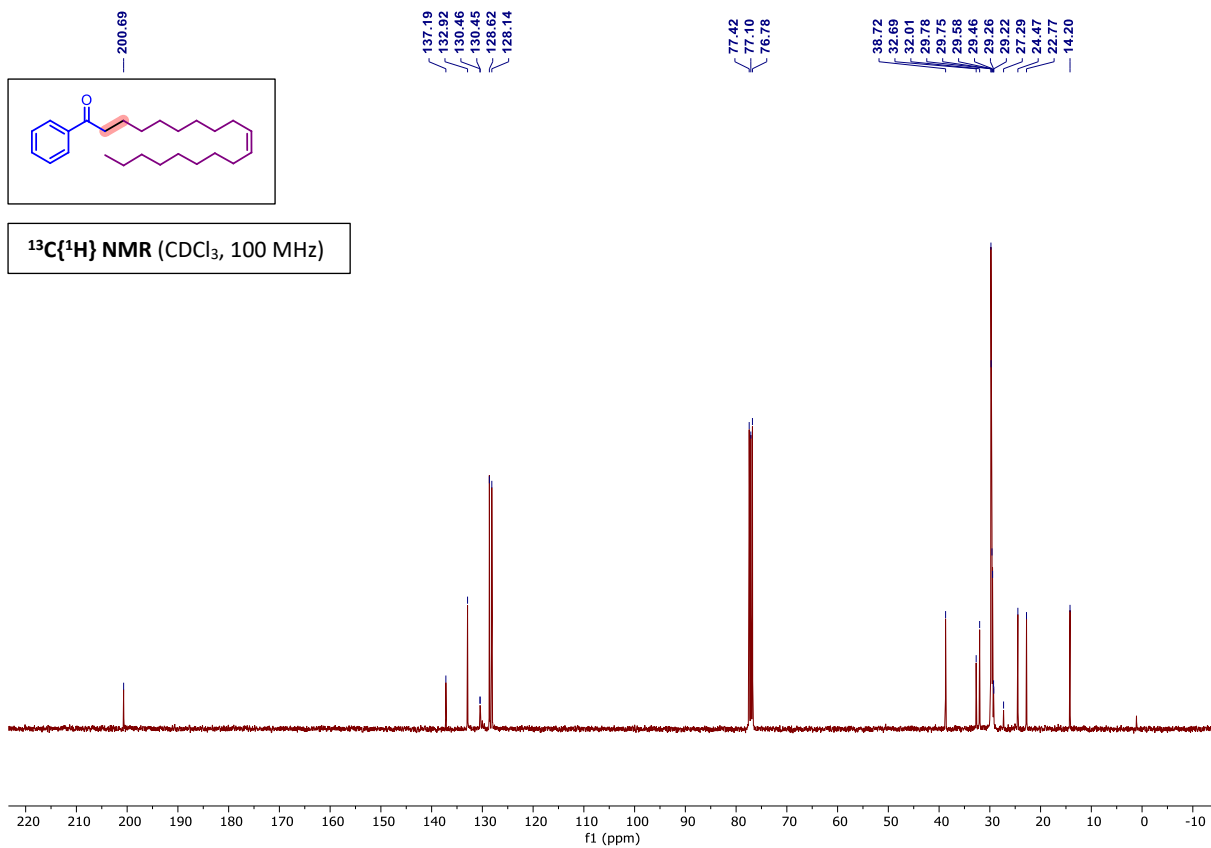

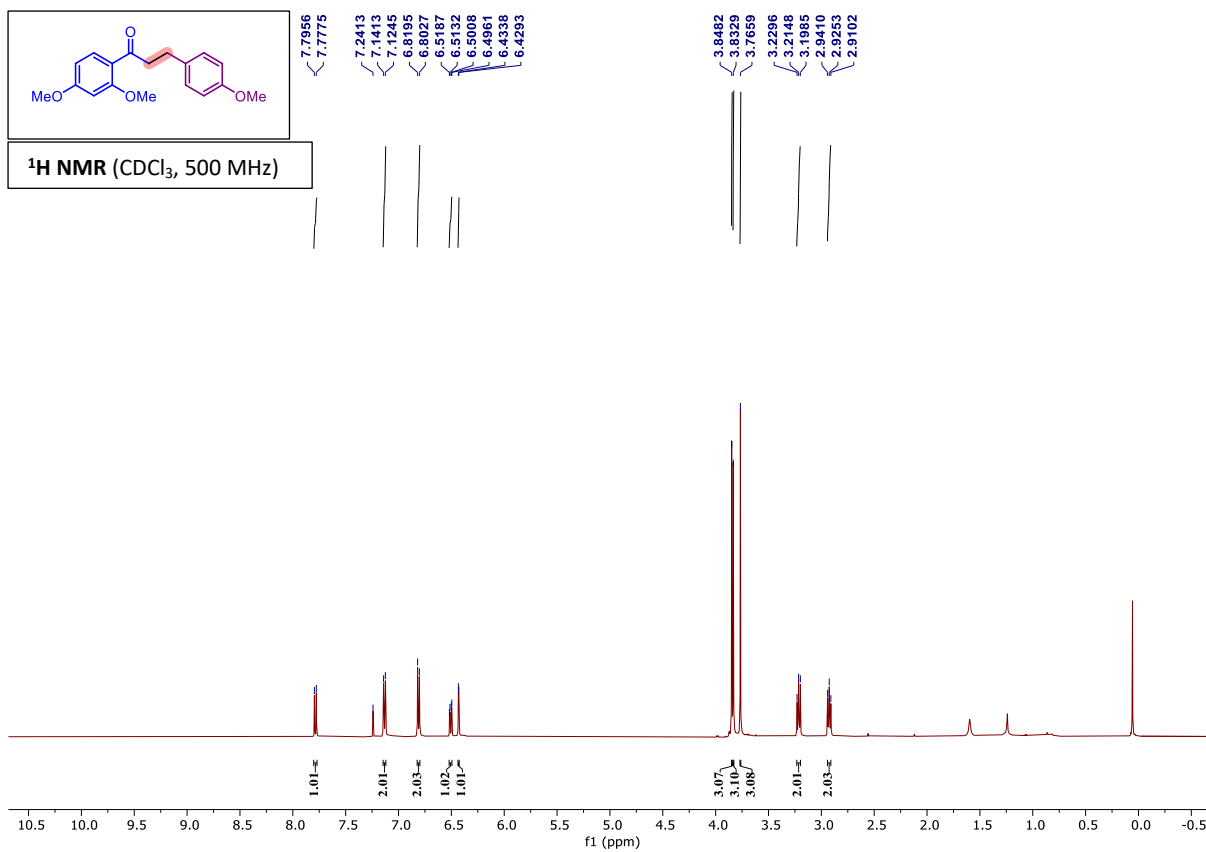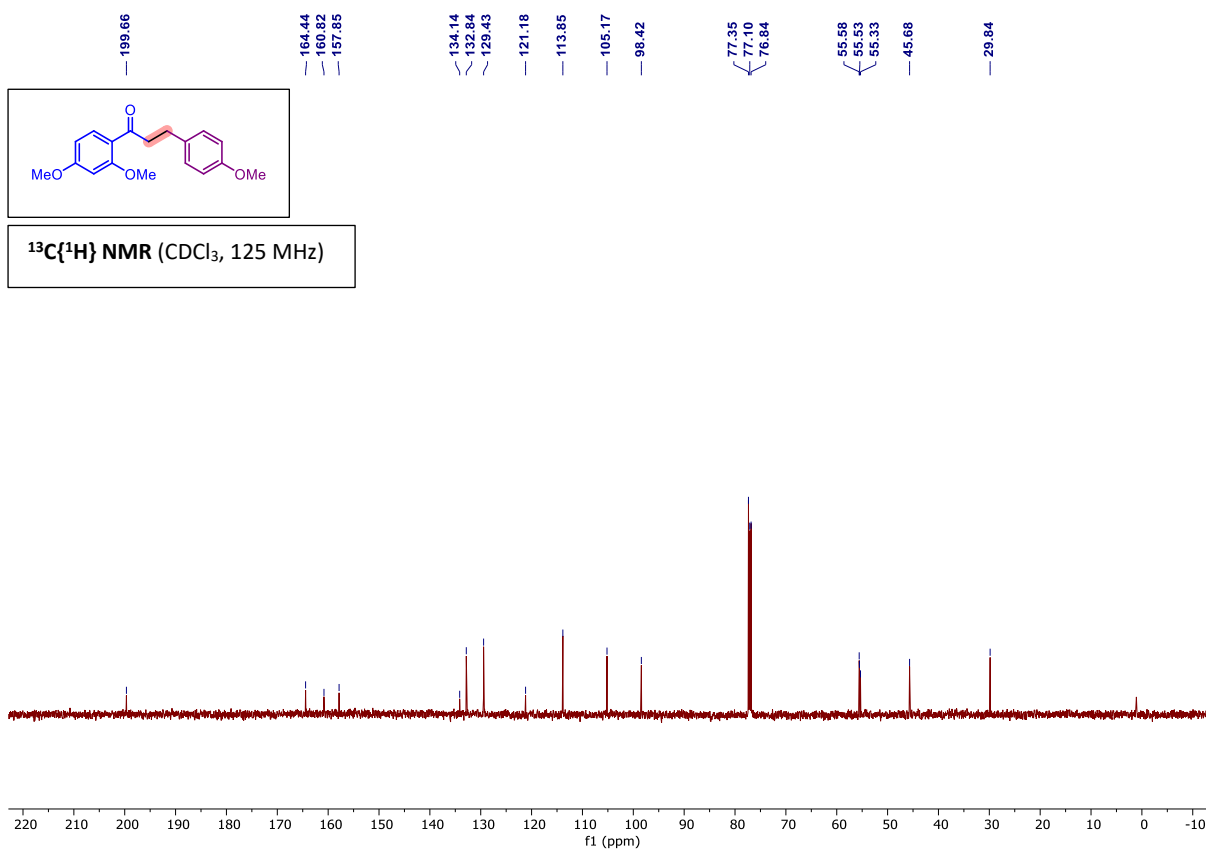

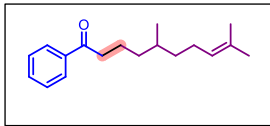

<sup>1</sup>H NMR (CDCl<sub>3</sub>, 400 MHz)

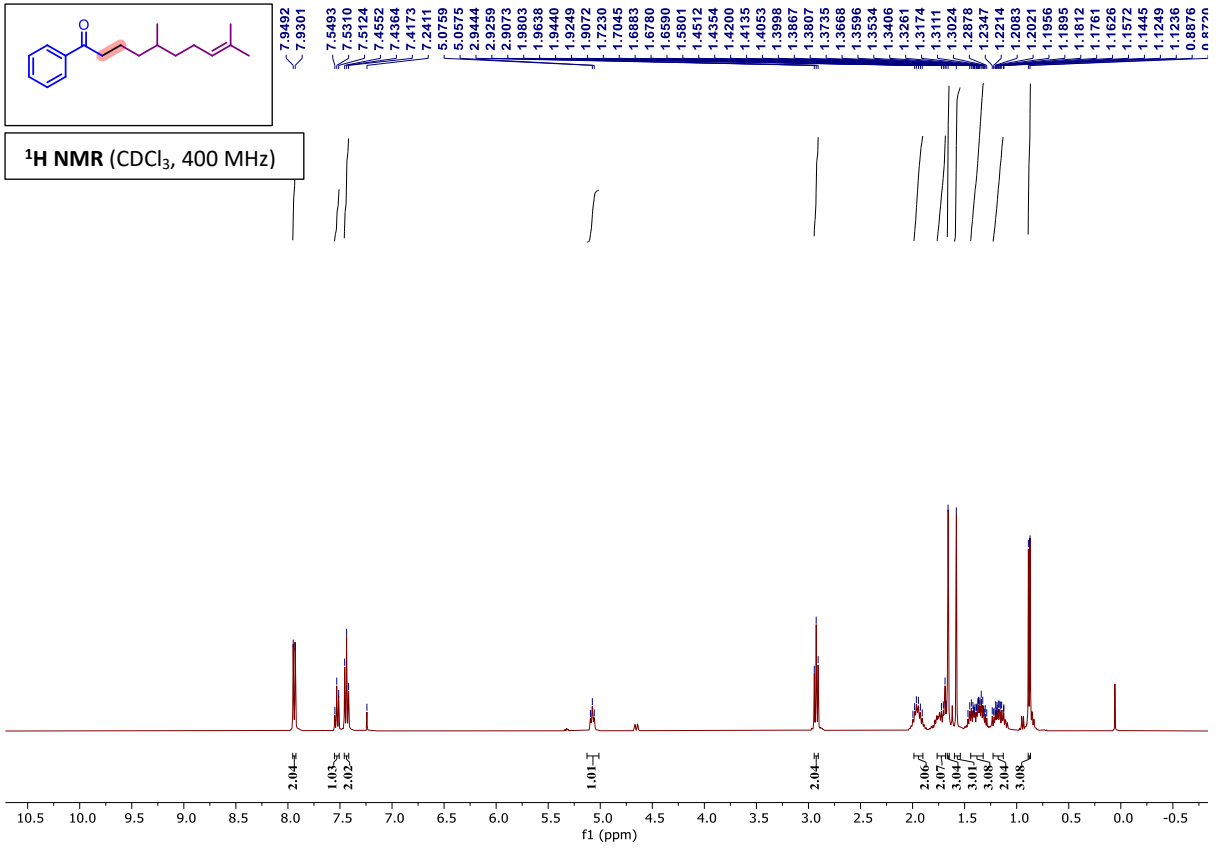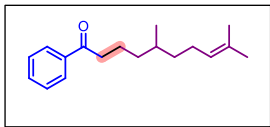

<sup>13</sup>C{<sup>1</sup>H} NMR (CDCl<sub>3</sub>, 125 MHz)

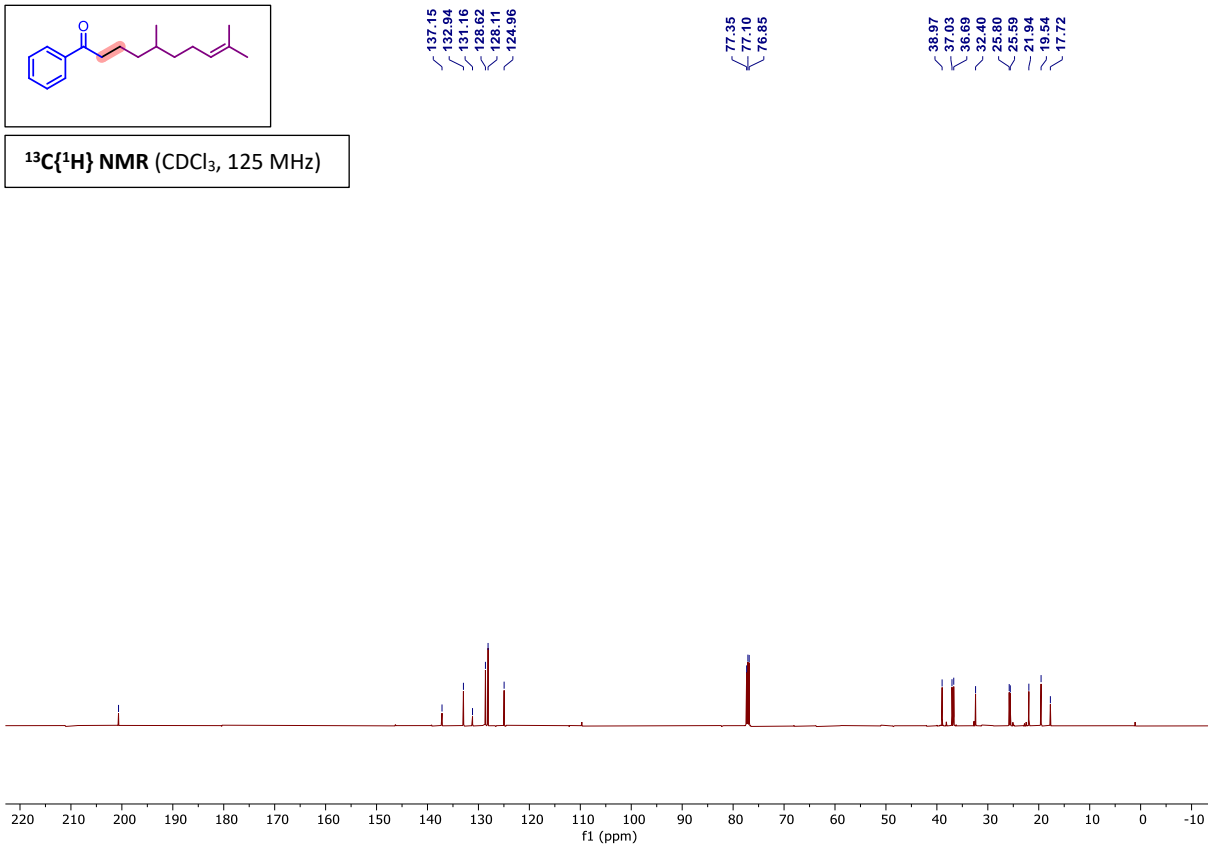

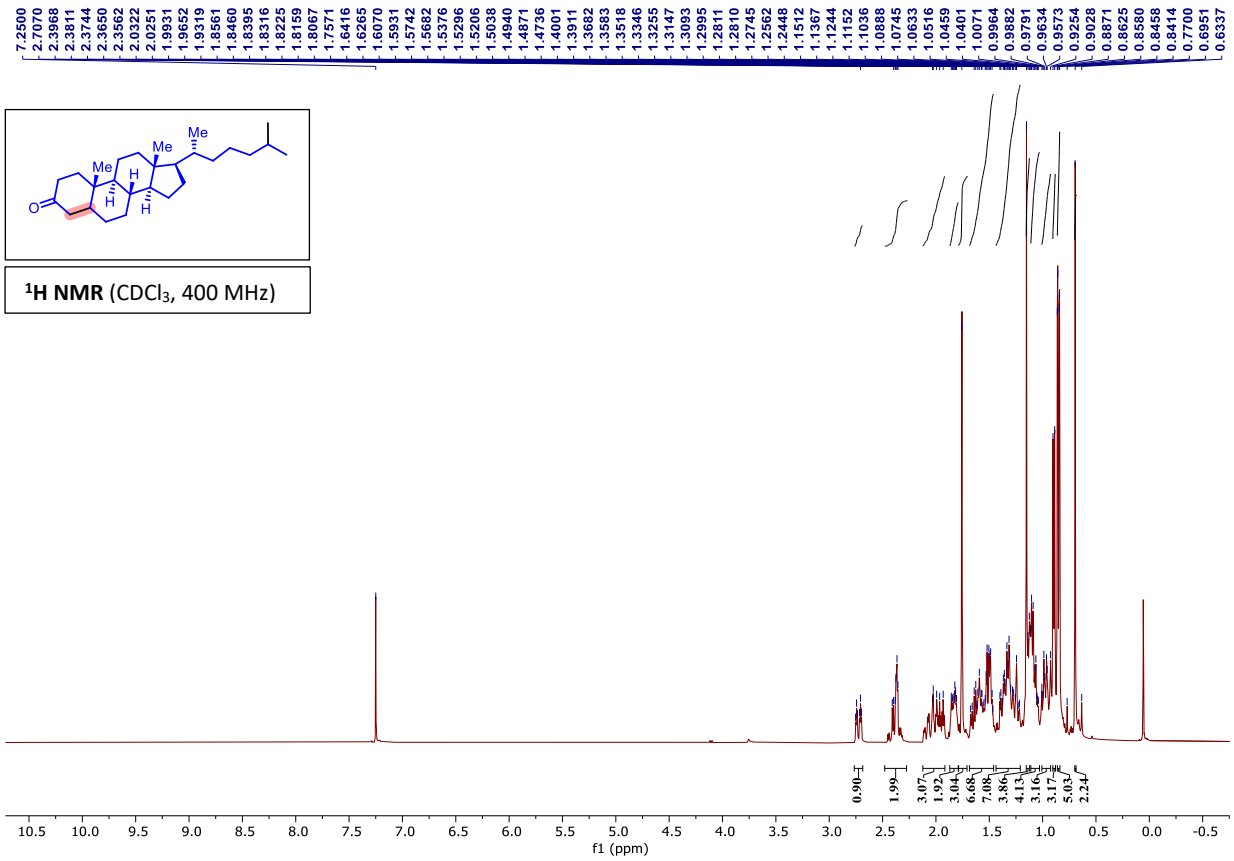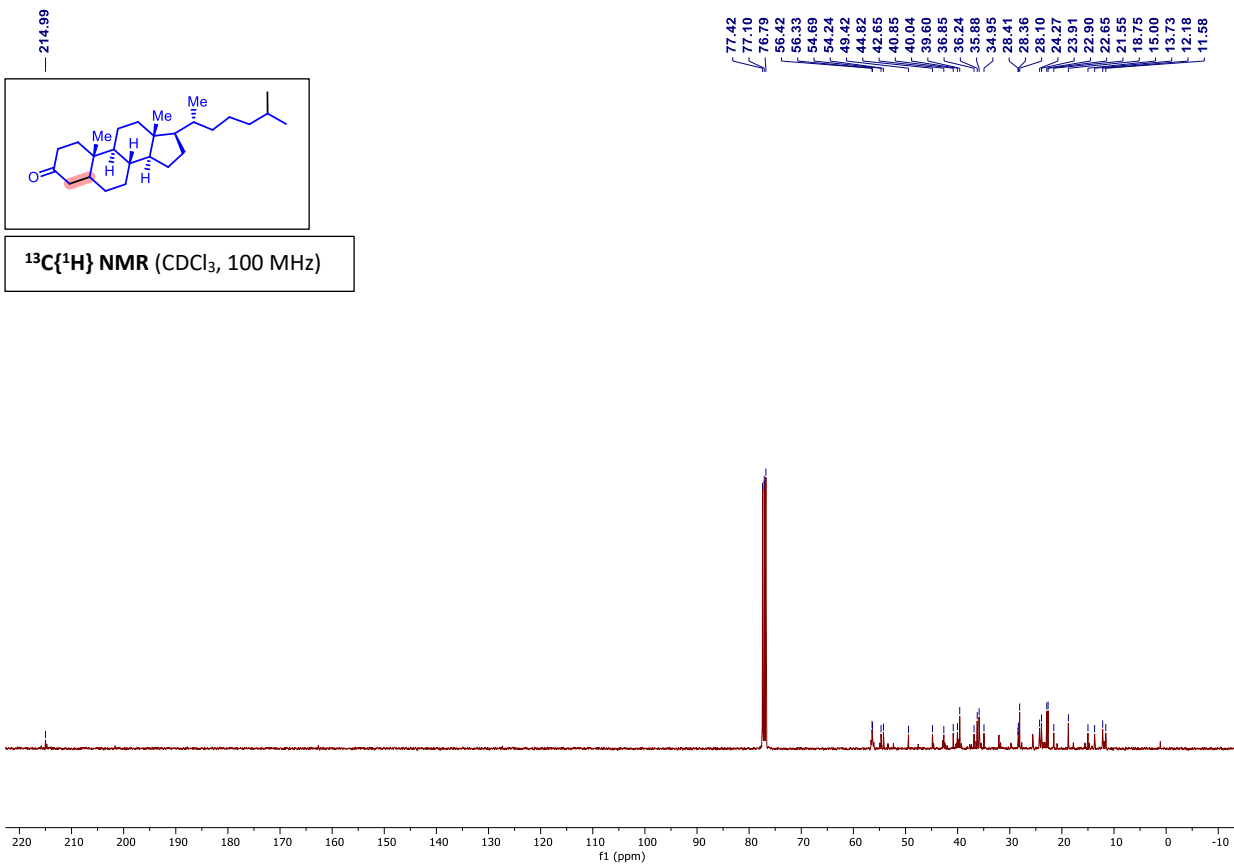

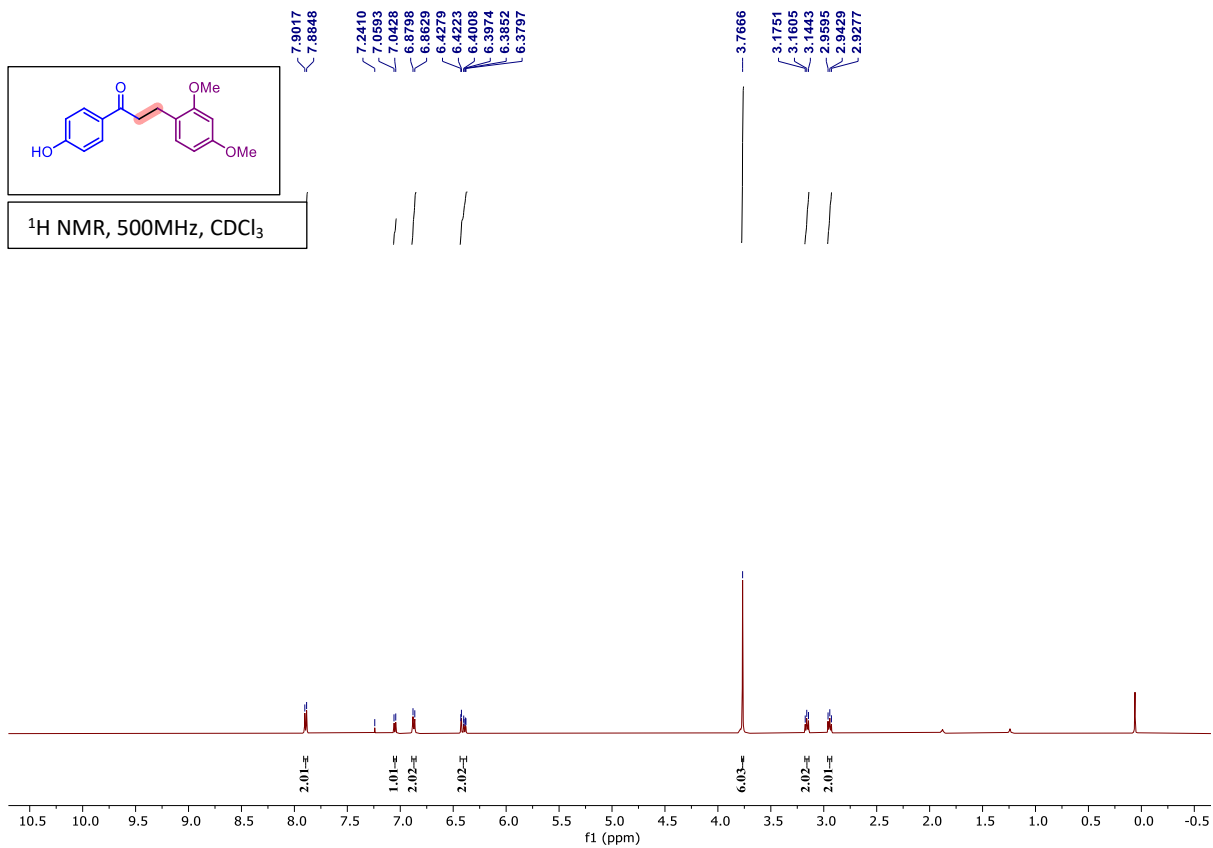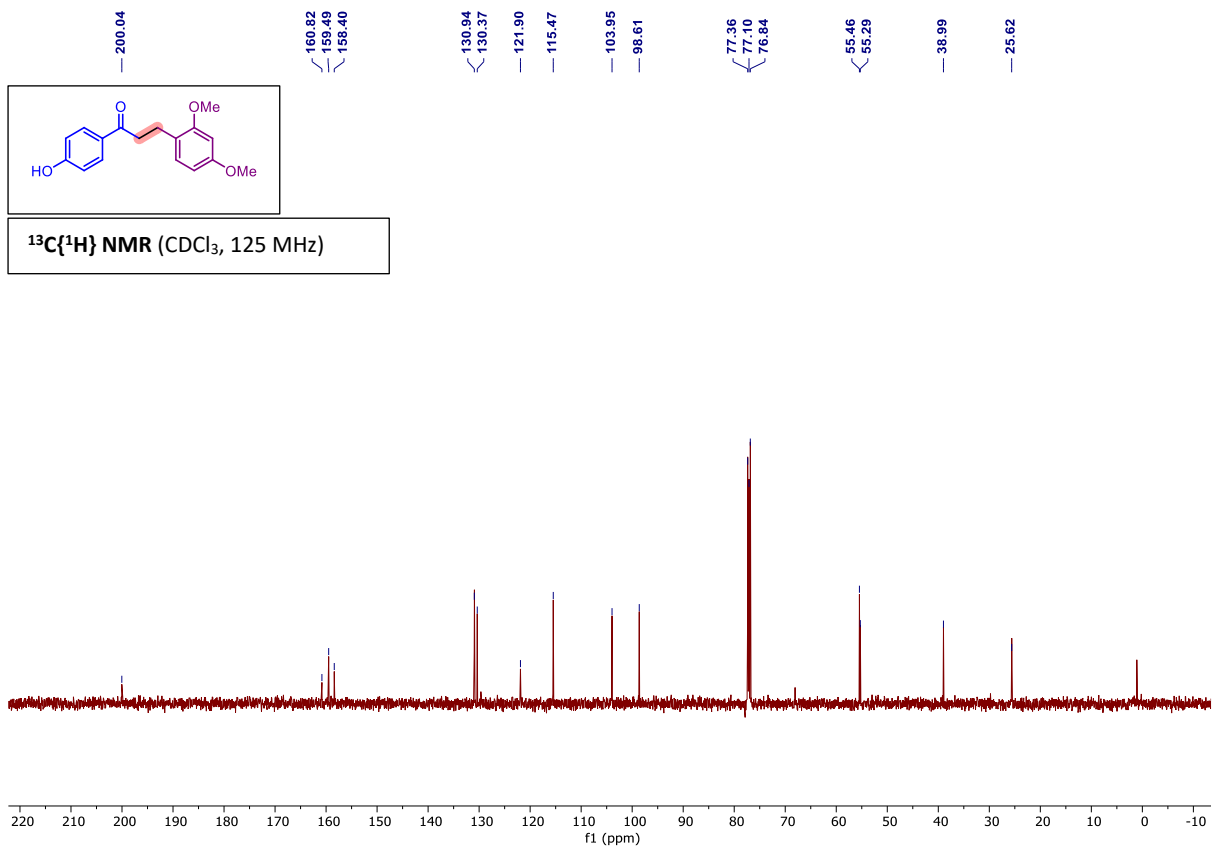

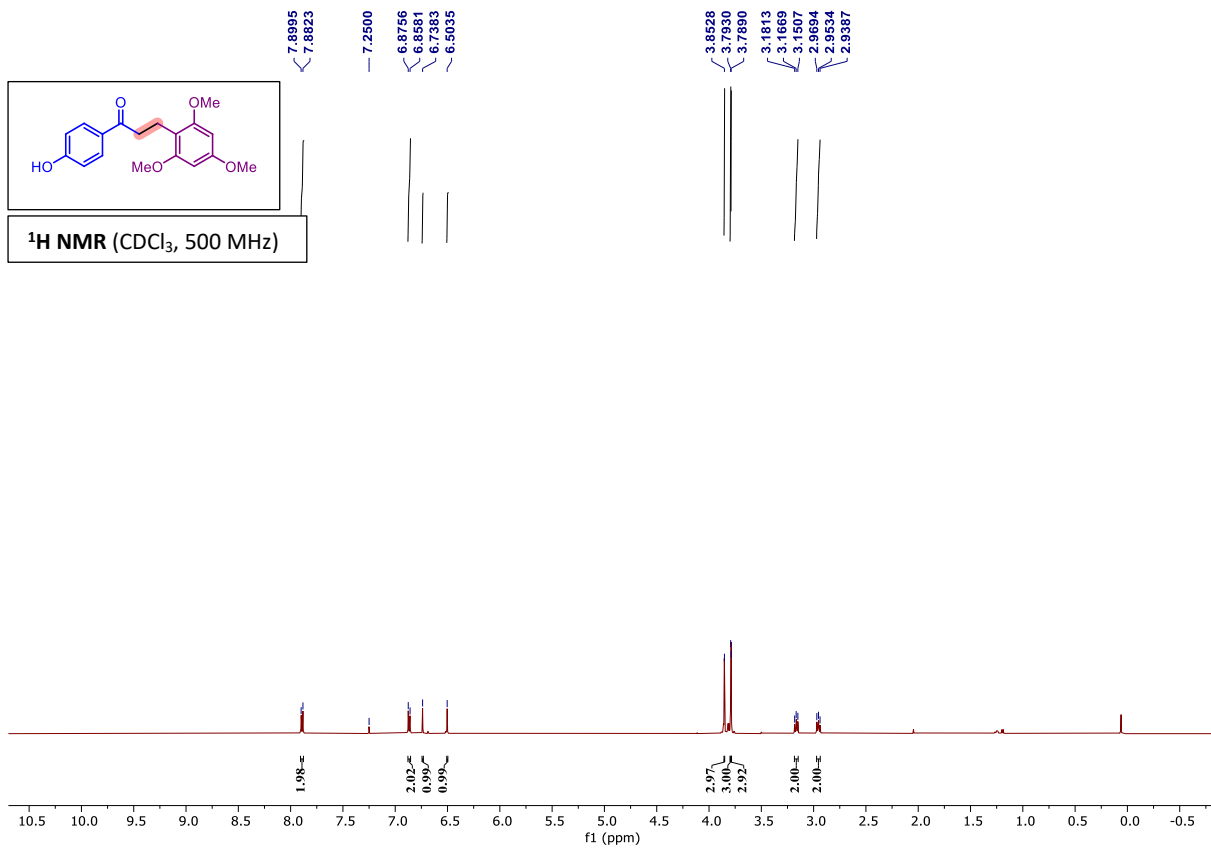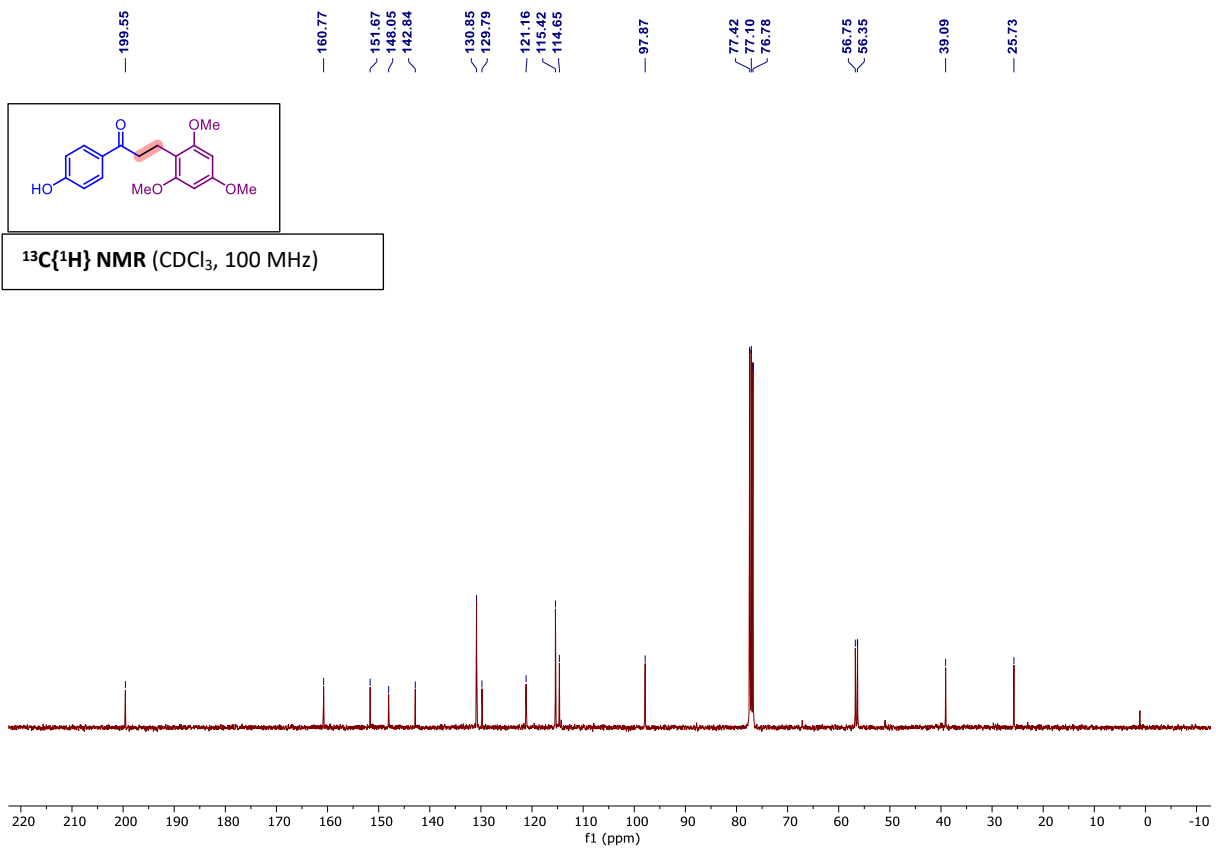

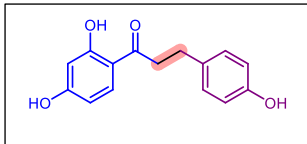

**<sup>1</sup>H NMR (CDCl<sub>3</sub>, 500 MHz)**

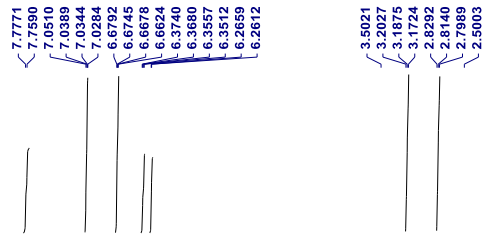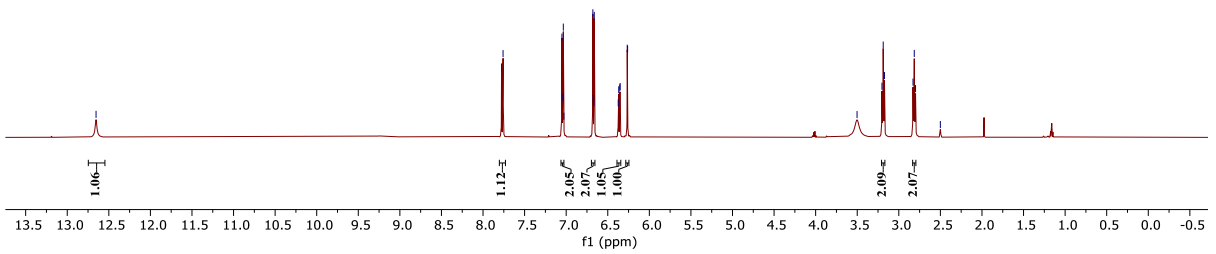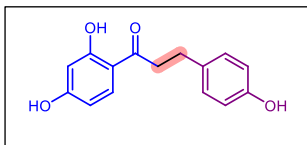

**<sup>13</sup>C{<sup>1</sup>H} NMR (CDCl<sub>3</sub>, 125 MHz)**

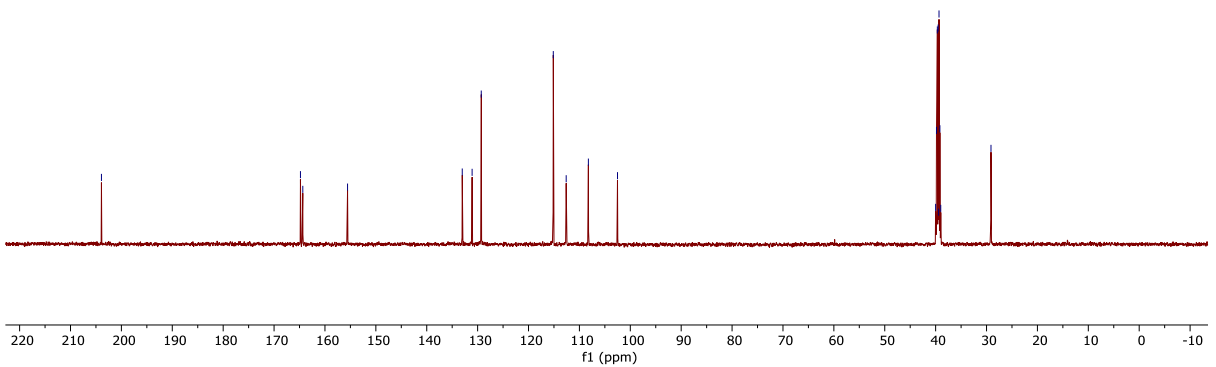

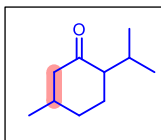

$^1\text{H}$  NMR ( $\text{CDCl}_3$ , 400 MHz)

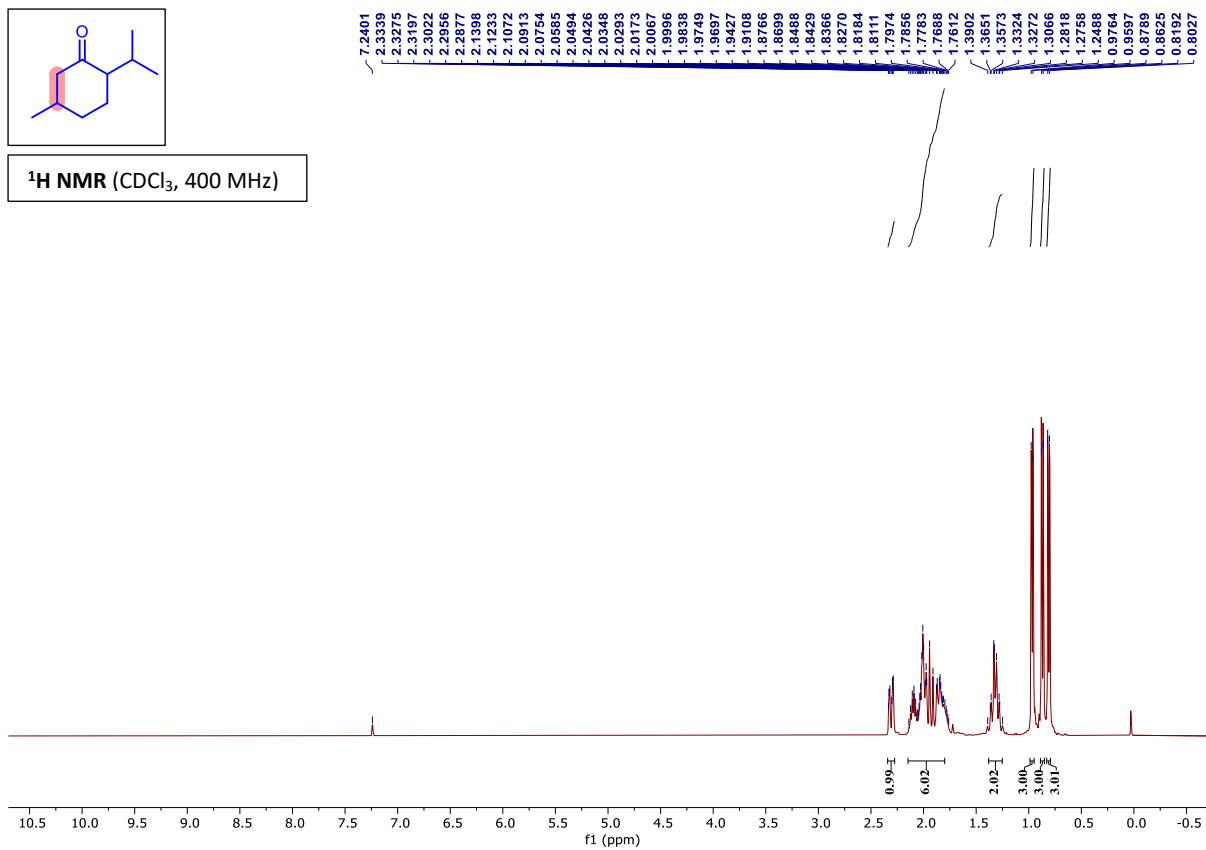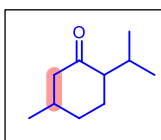

$^{13}\text{C}\{^1\text{H}\}$  NMR ( $\text{CDCl}_3$ , 100 MHz)

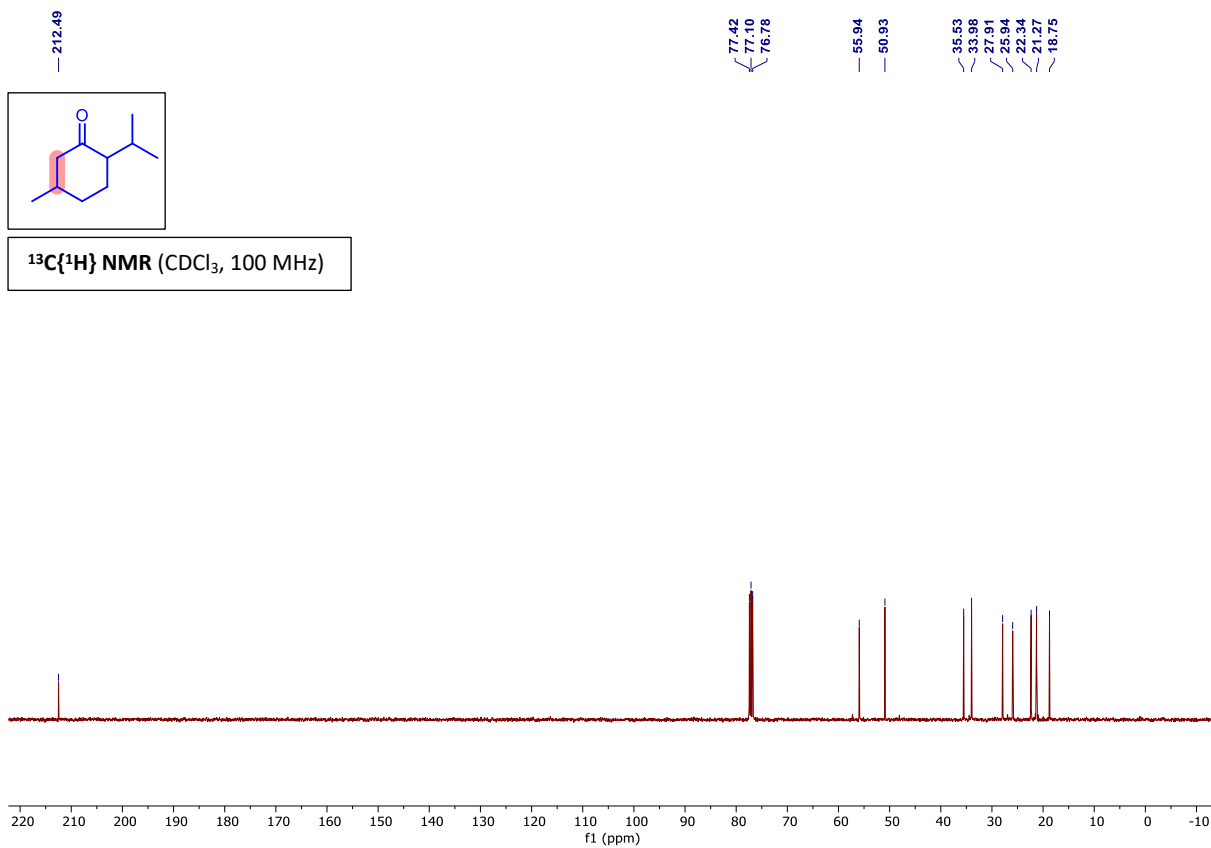



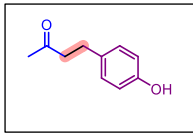

$^1\text{H NMR}$  ( $\text{CDCl}_3$ , 500 MHz)

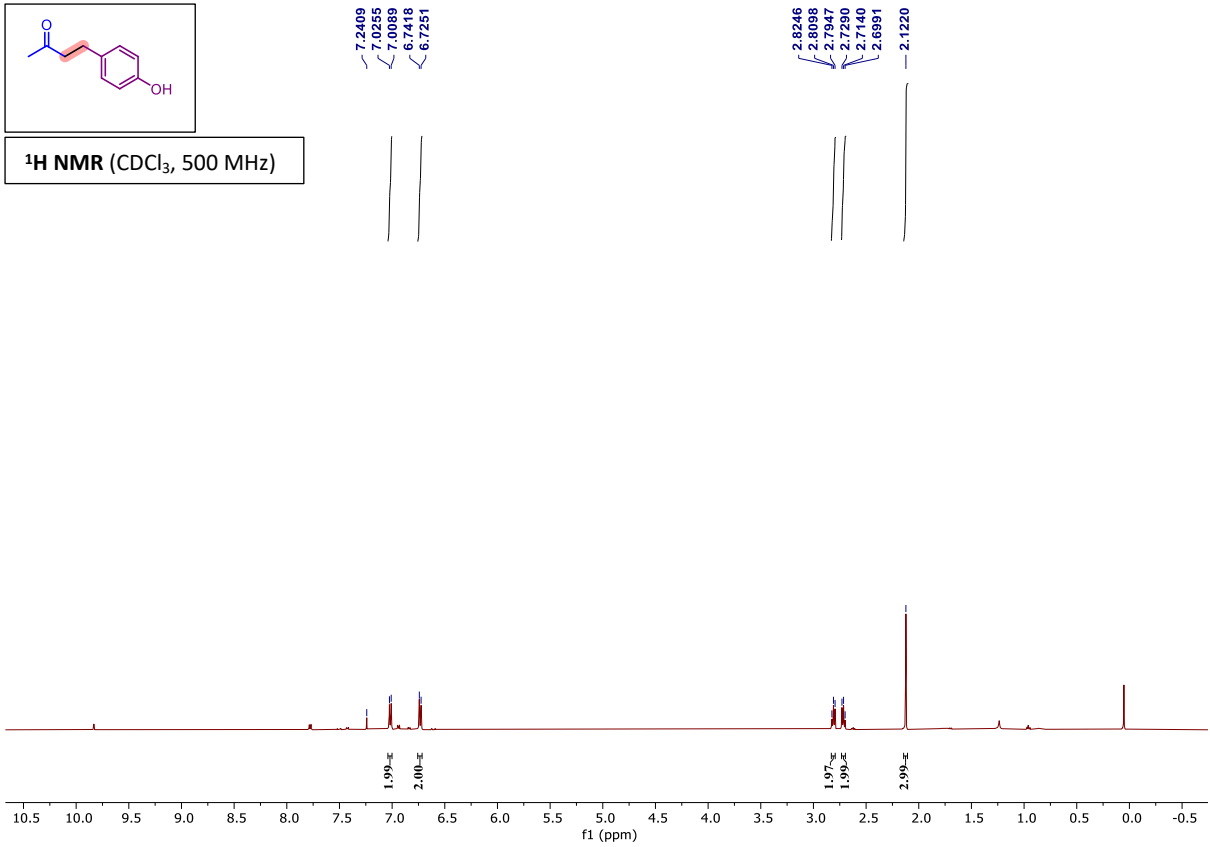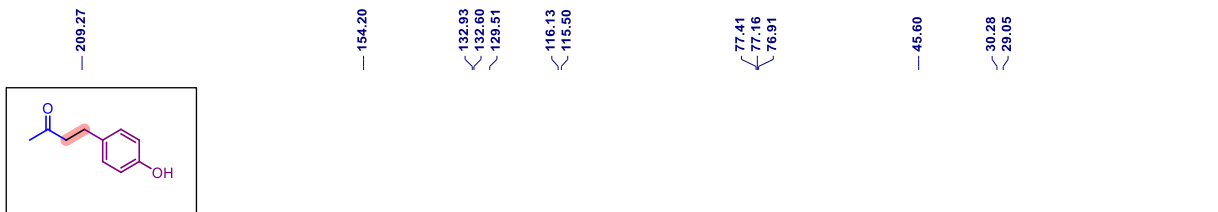

$^{13}\text{C}\{^1\text{H}\}$  NMR ( $\text{CDCl}_3$ , 125 MHz)

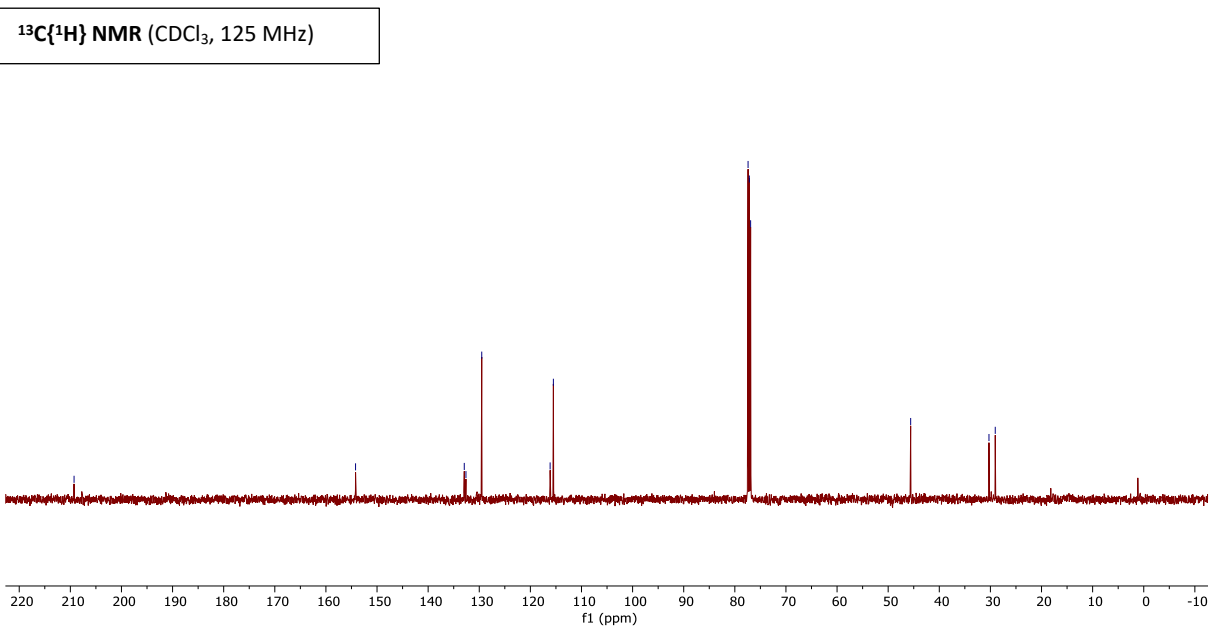

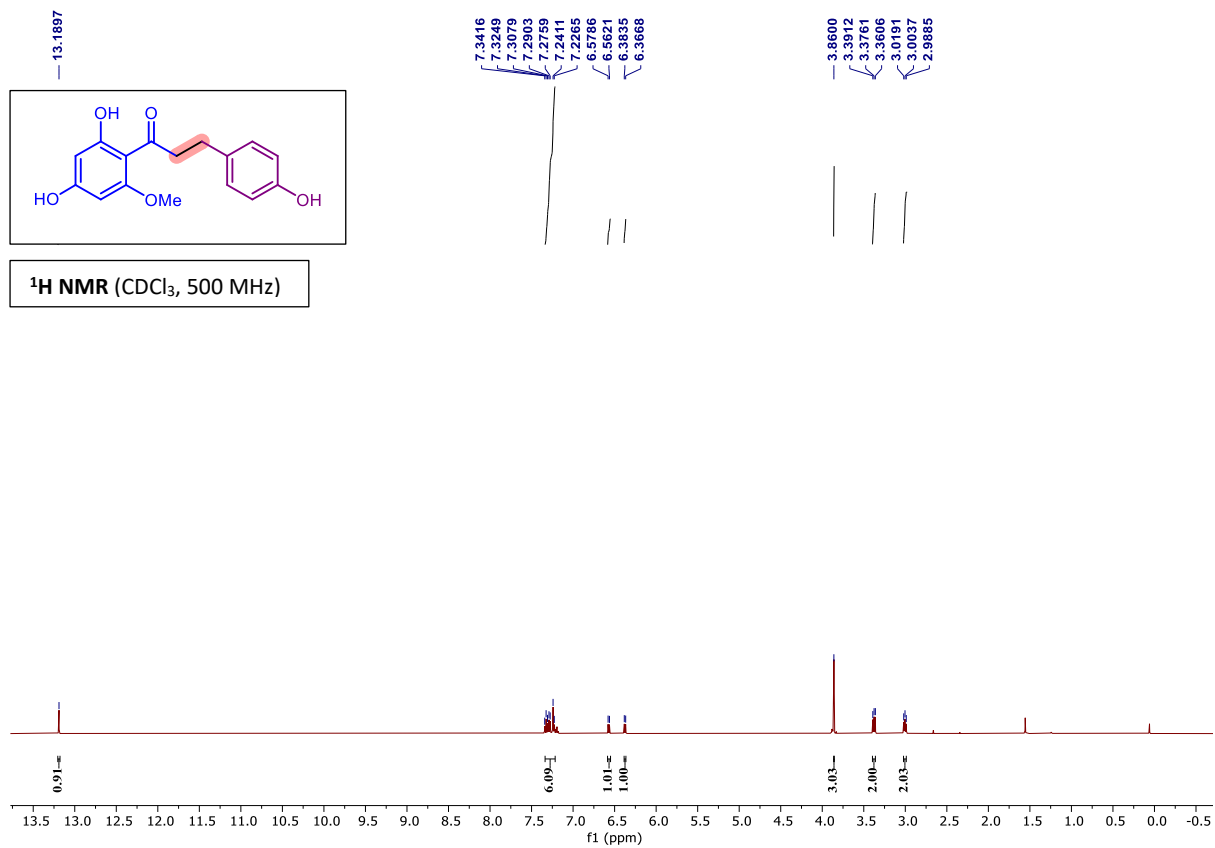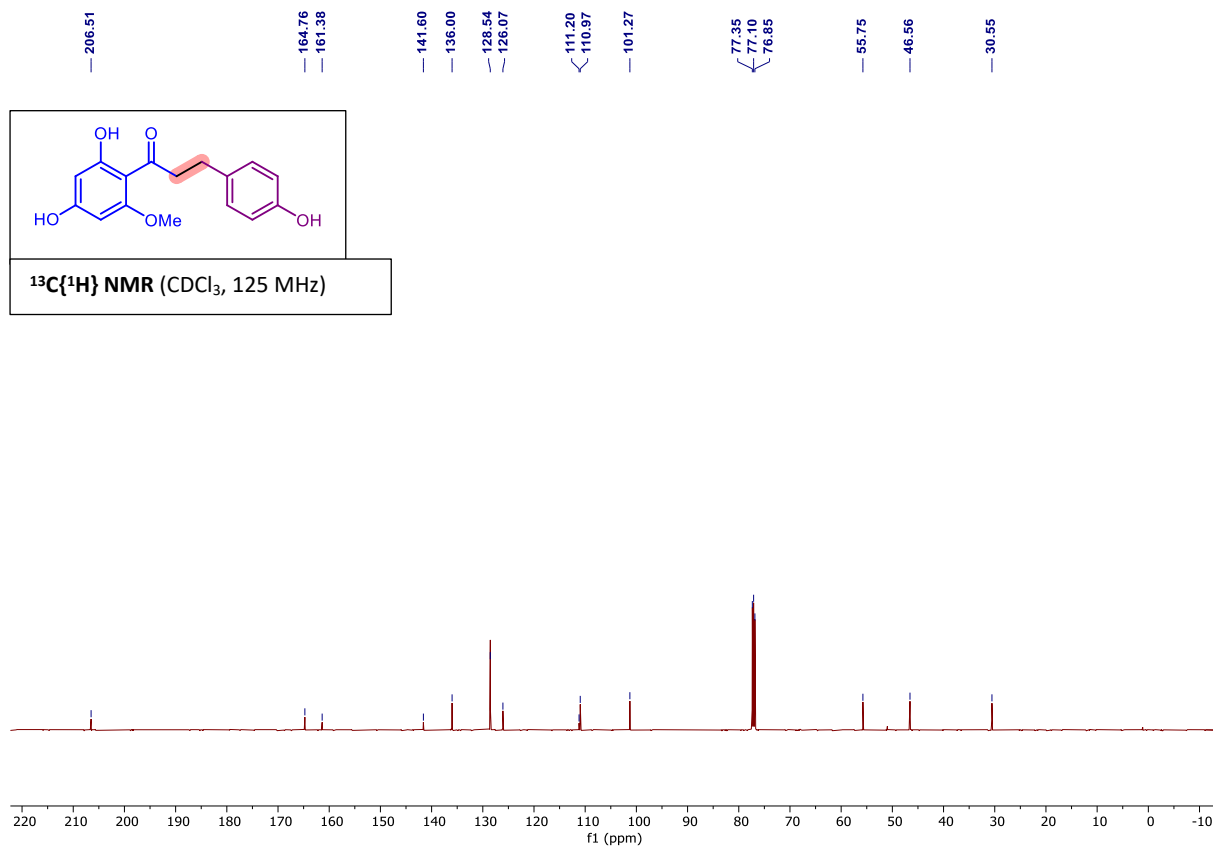

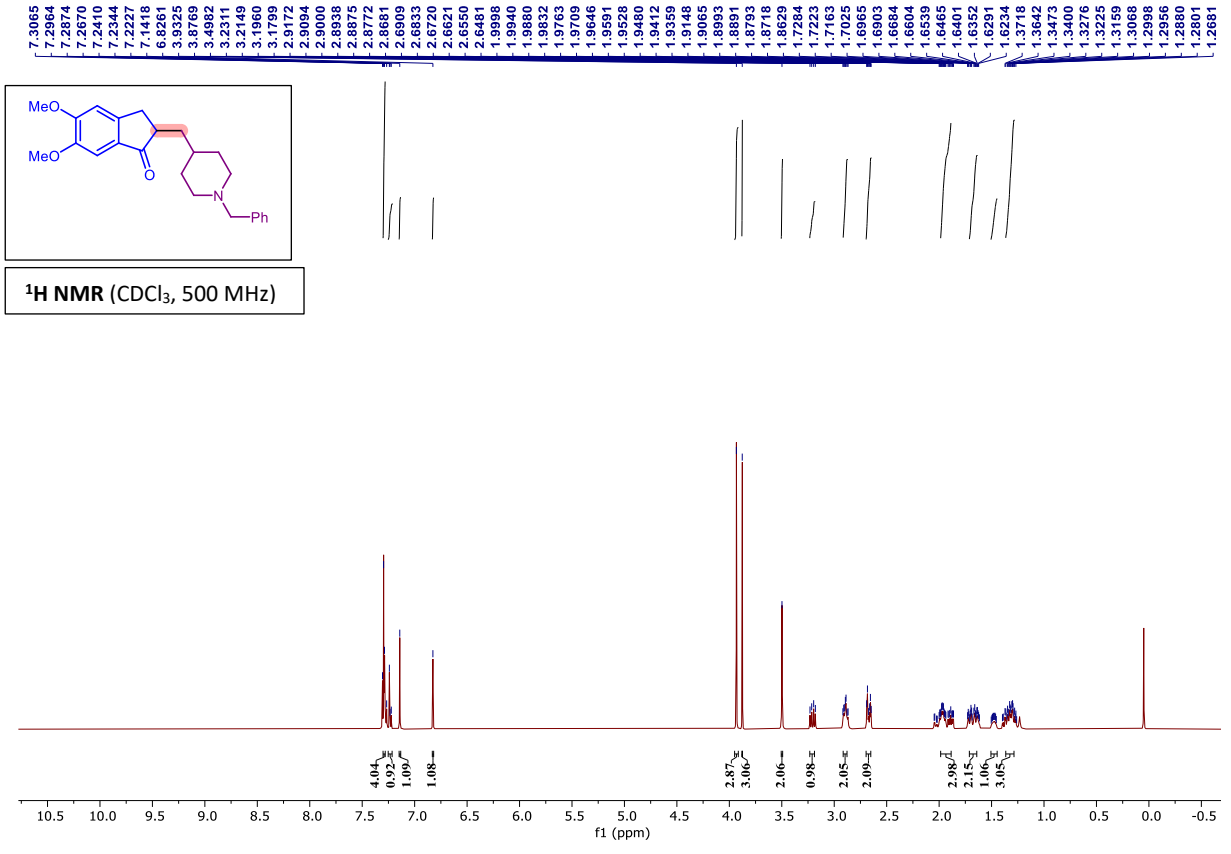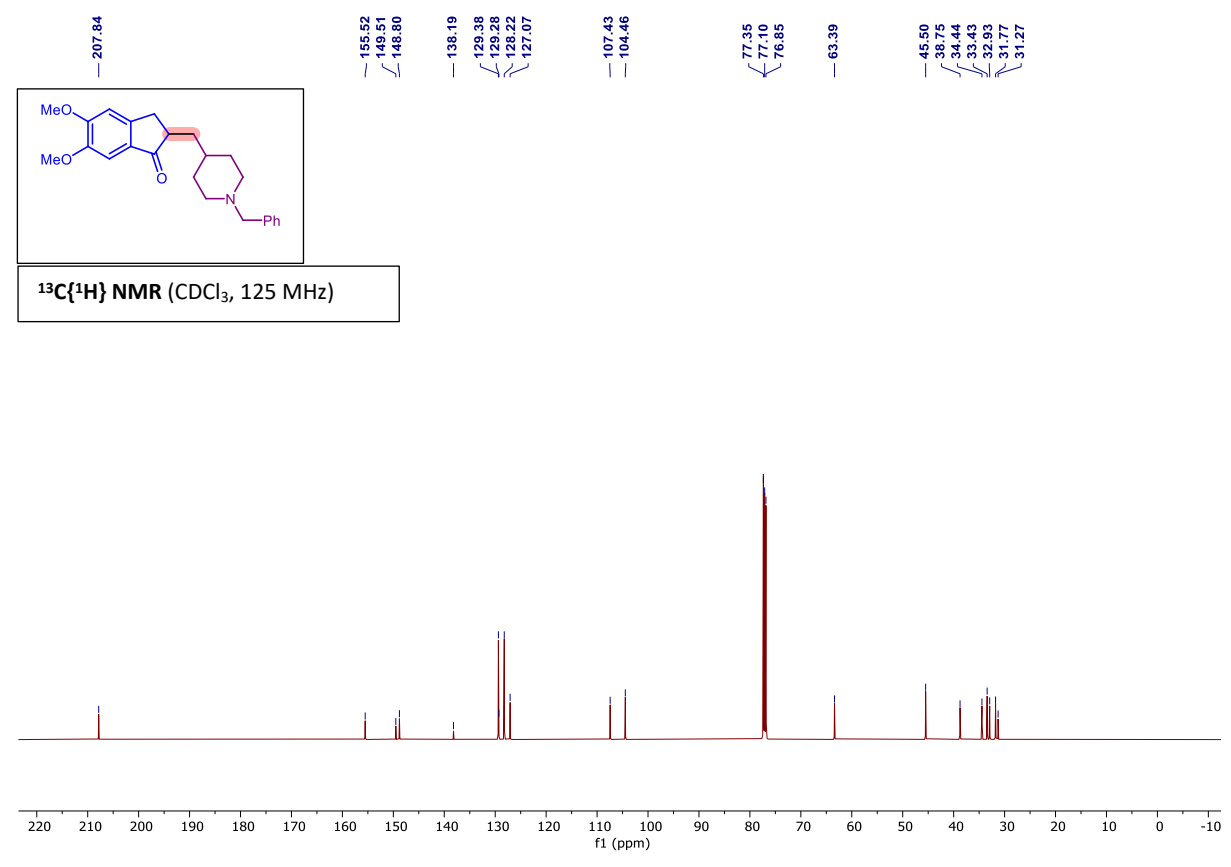

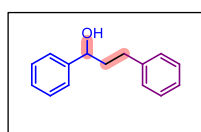

$^1\text{H NMR}$  ( $\text{CDCl}_3$ , 400 MHz)

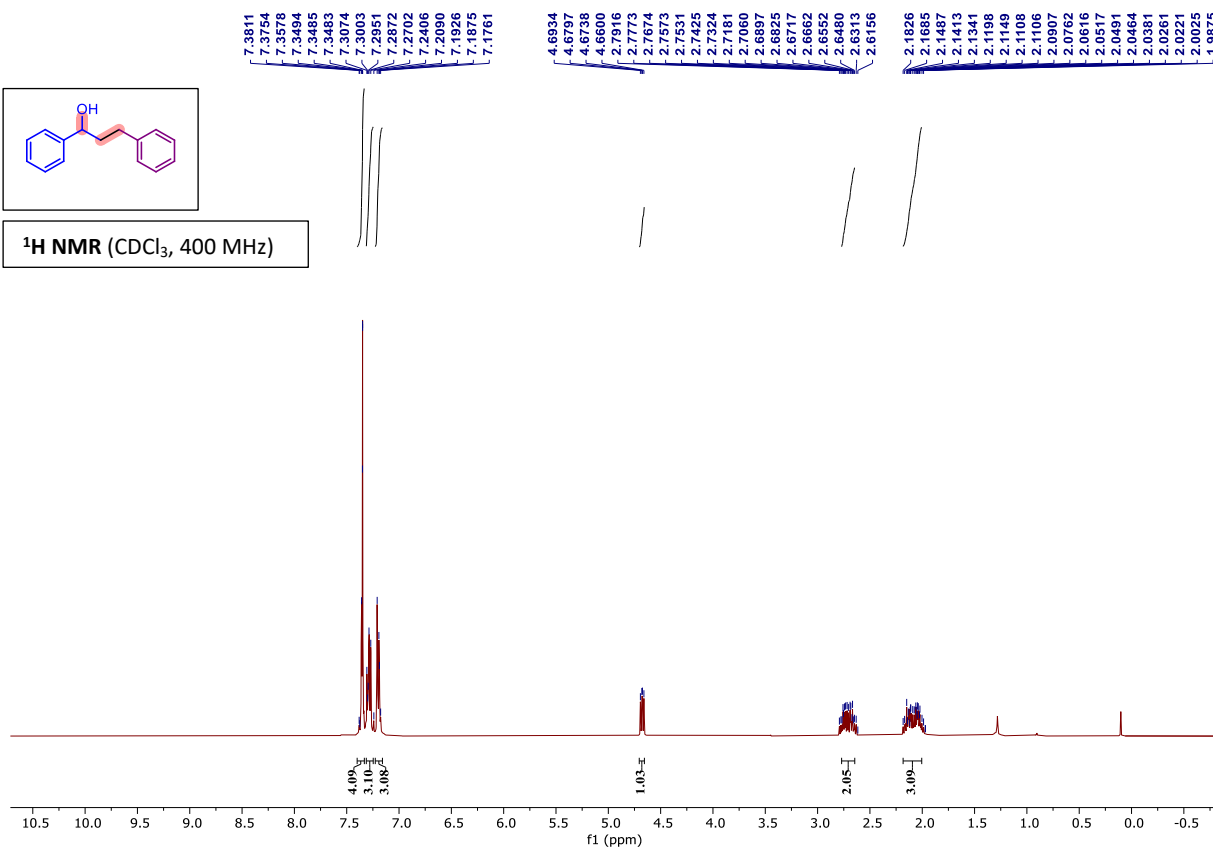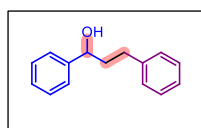

$^{13}\text{C}\{^1\text{H}\}$  NMR ( $\text{CDCl}_3$ , 100 MHz)

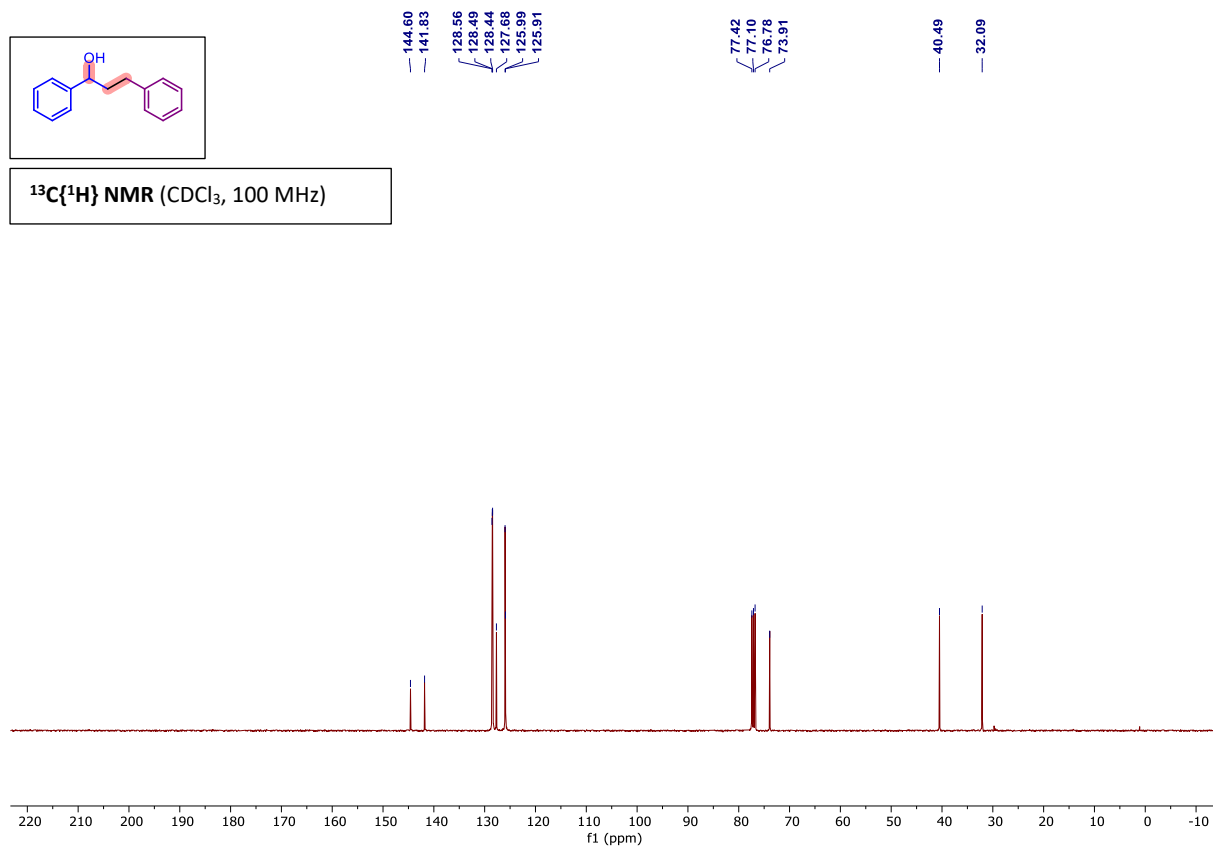

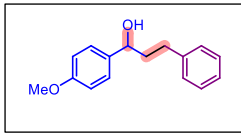

<sup>1</sup>H NMR (CDCl<sub>3</sub>, 400 MHz)

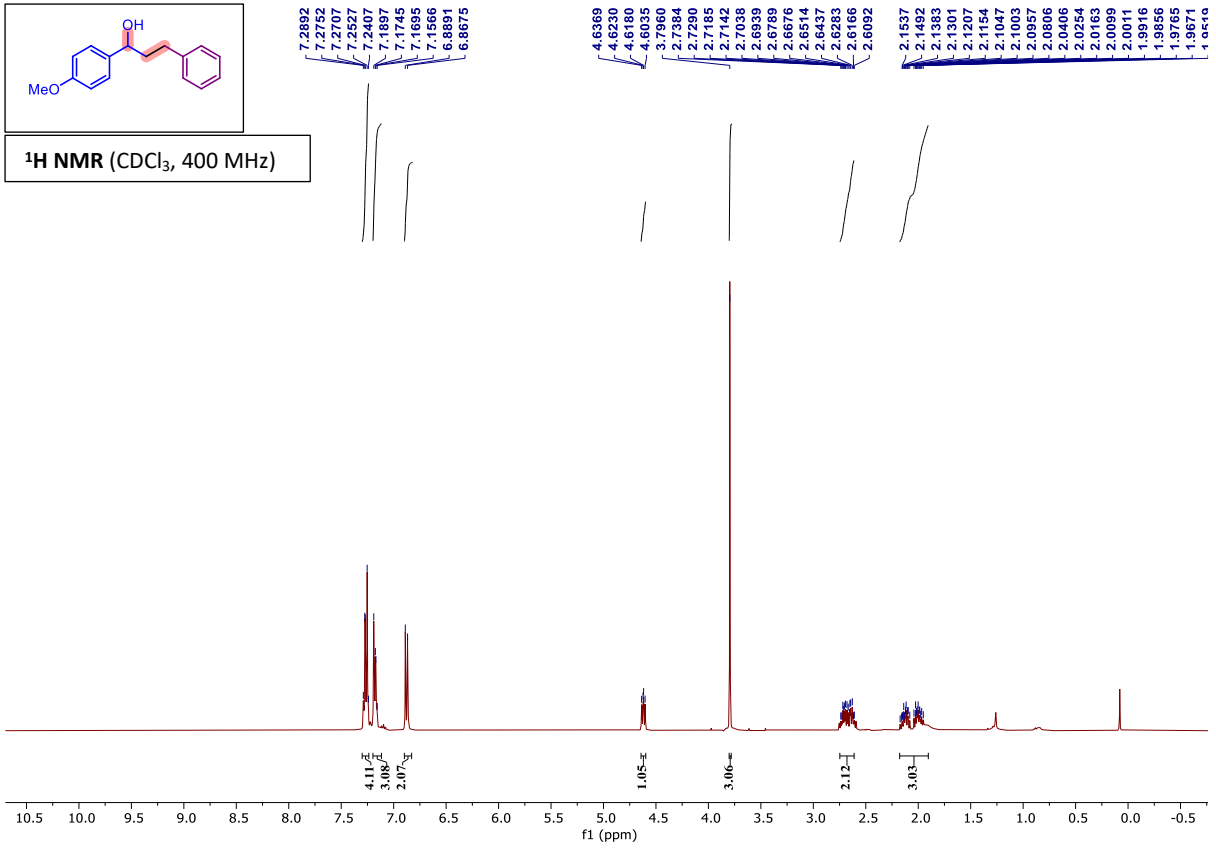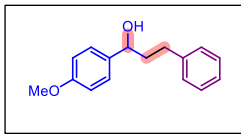

<sup>13</sup>C{<sup>1</sup>H} NMR (CDCl<sub>3</sub>, 125 MHz)

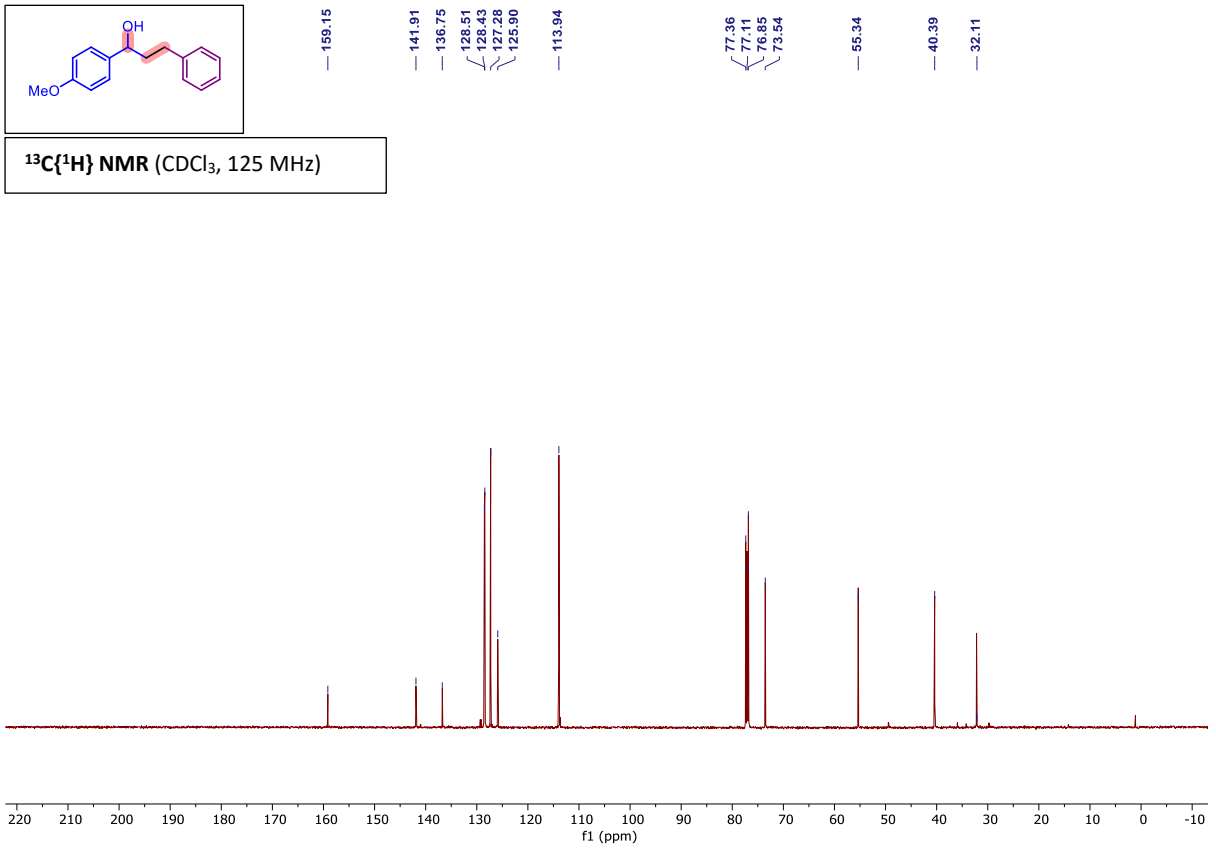

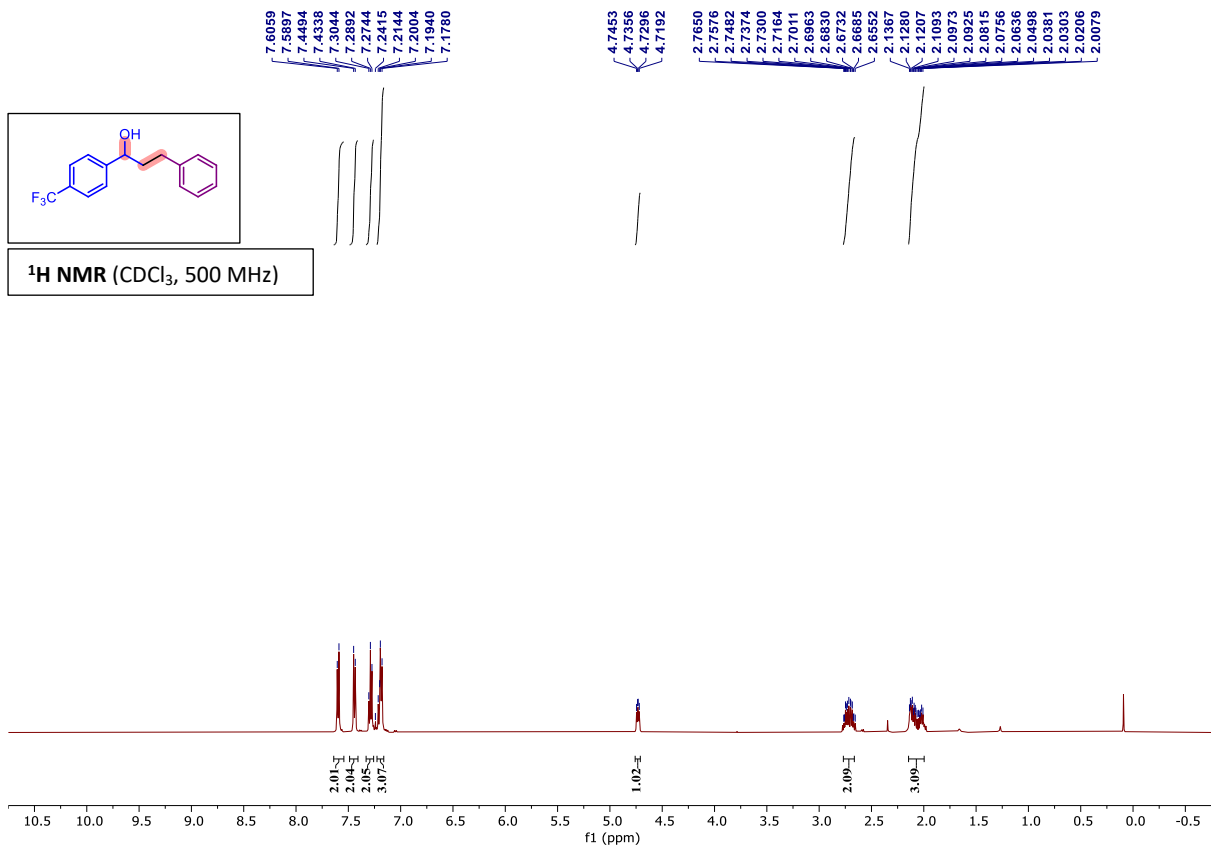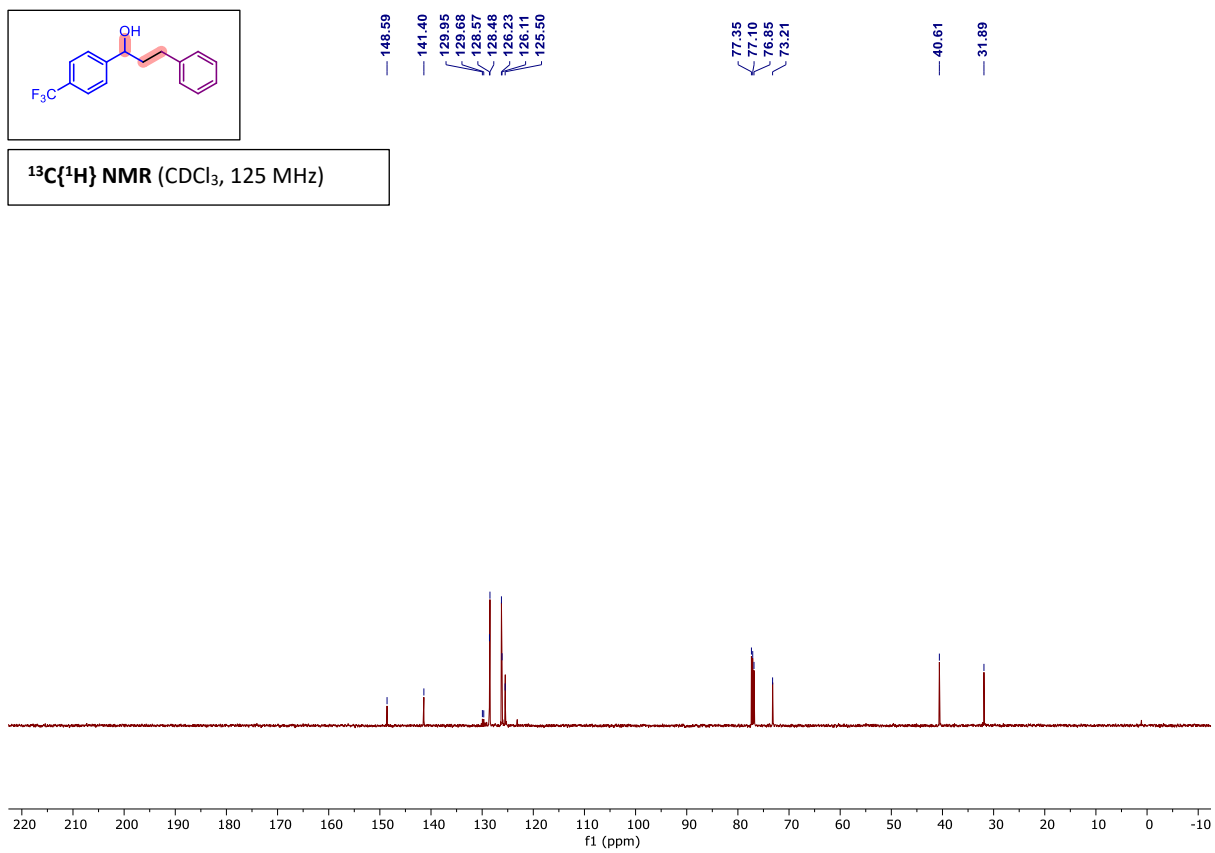

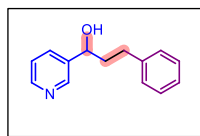

<sup>1</sup>H NMR (CDCl<sub>3</sub>, 400 MHz)

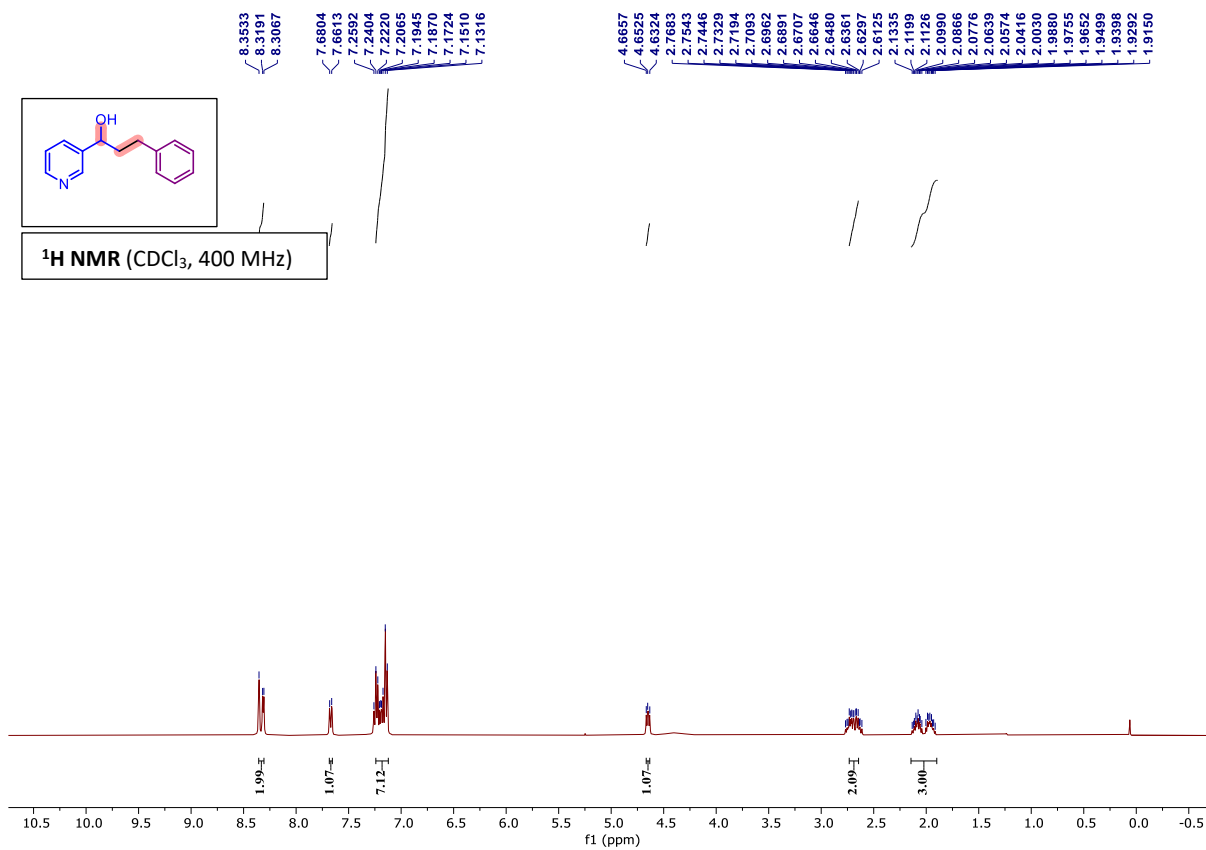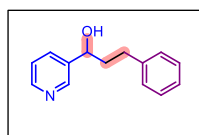

<sup>13</sup>C{<sup>1</sup>H} NMR (CDCl<sub>3</sub>, 100 MHz)

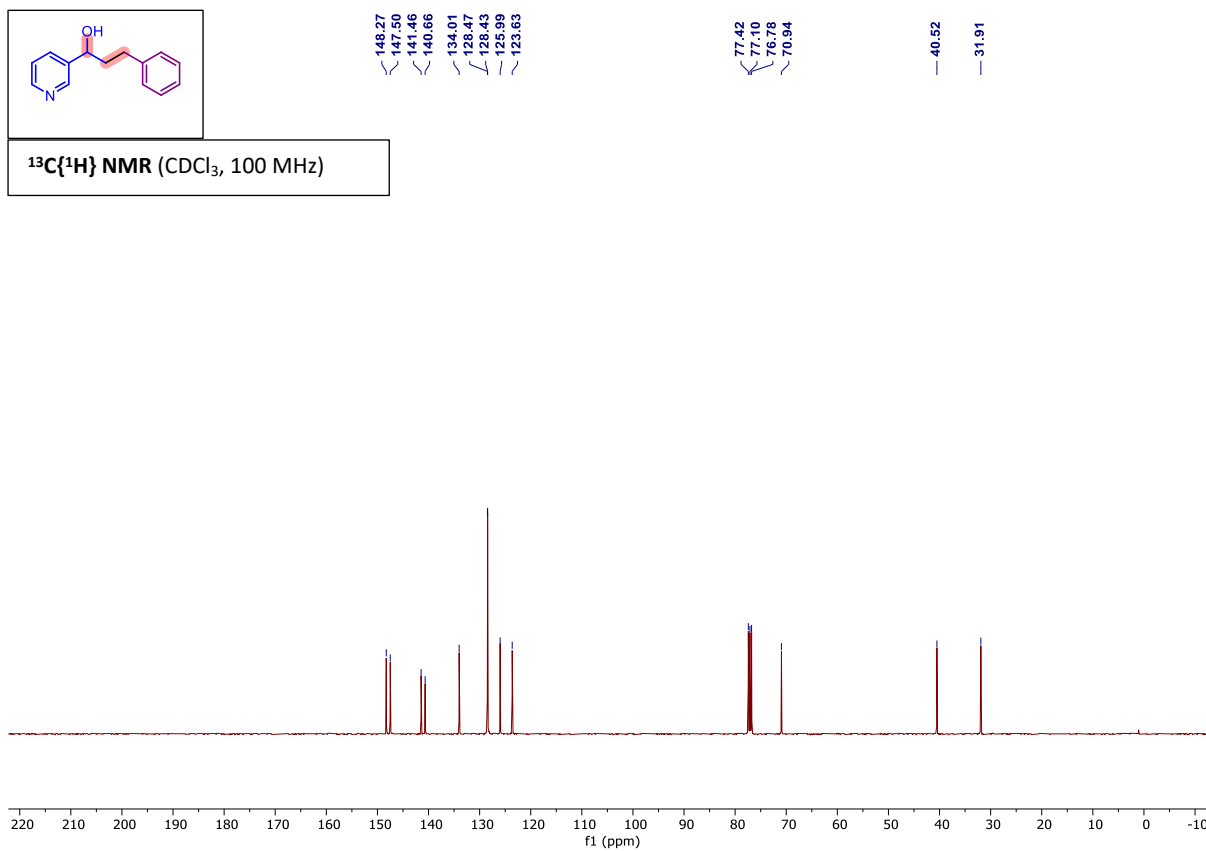

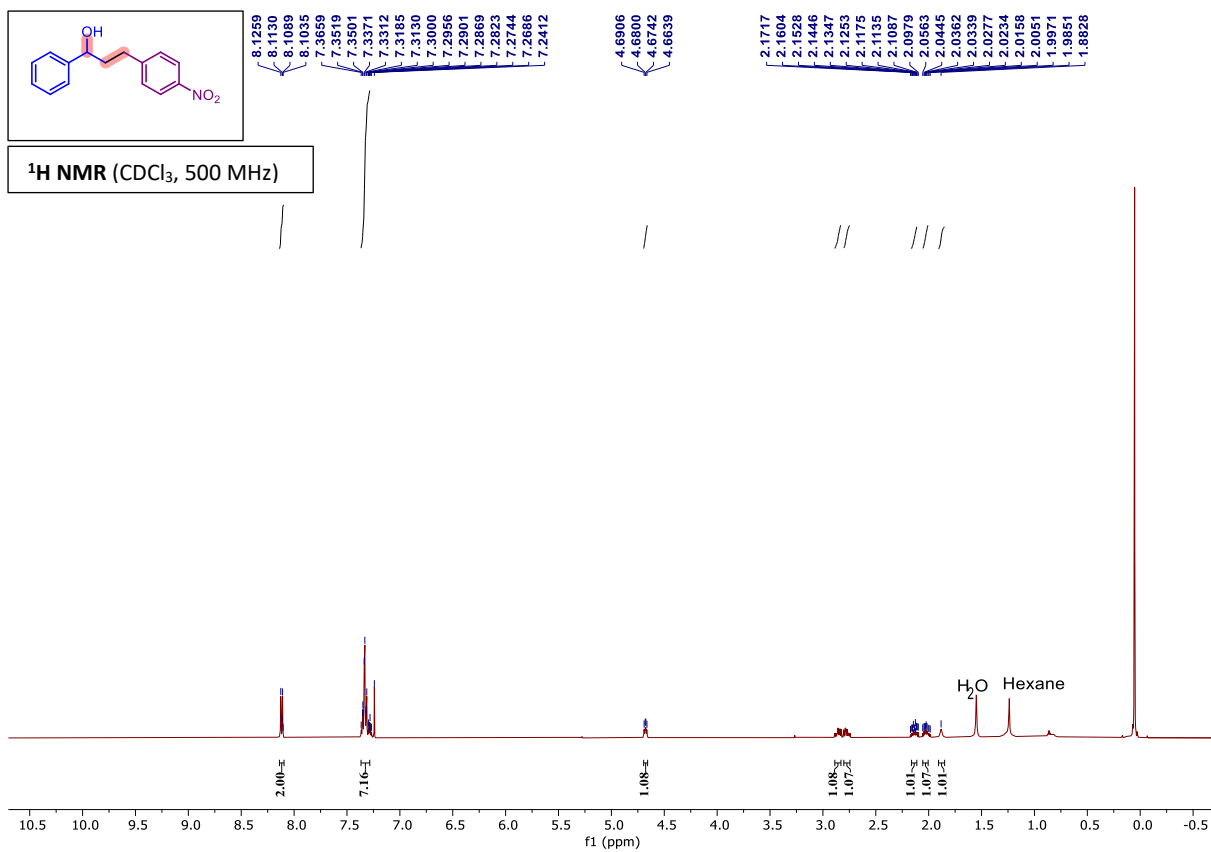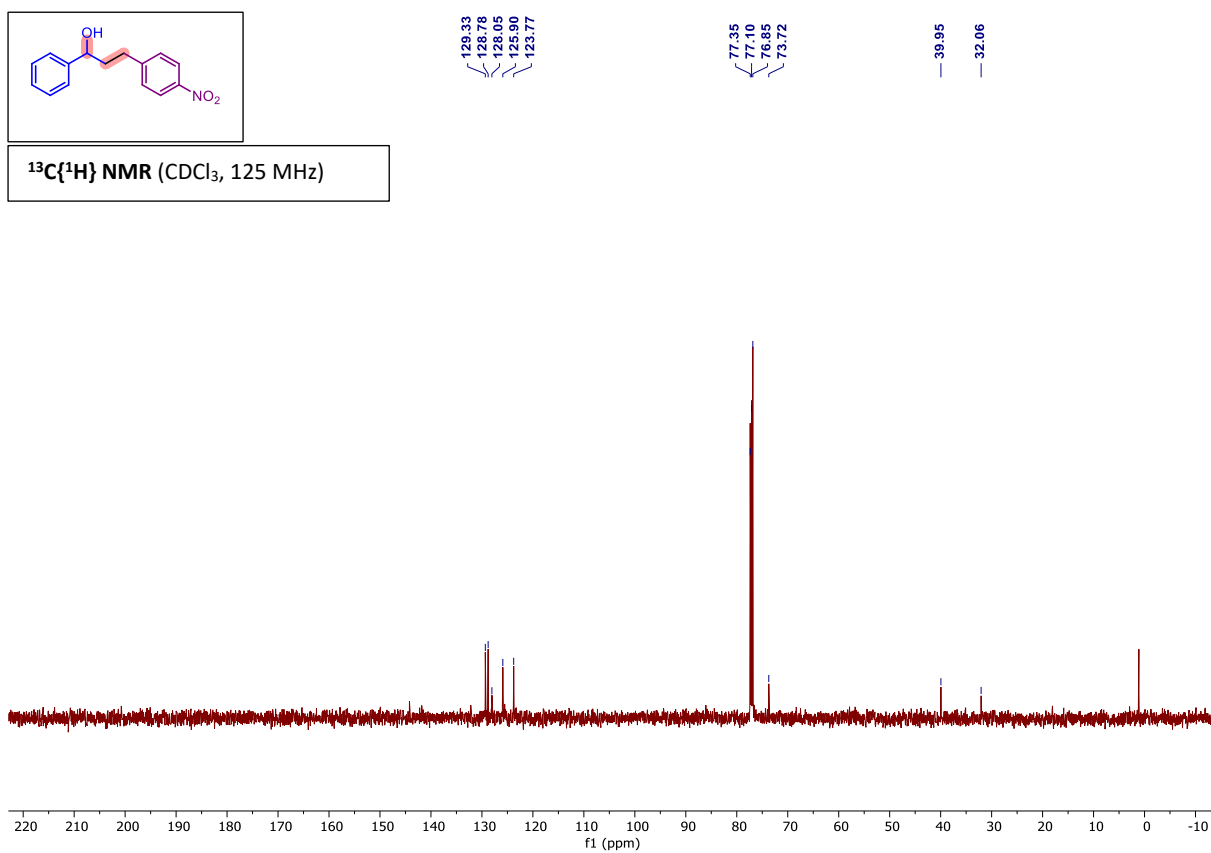



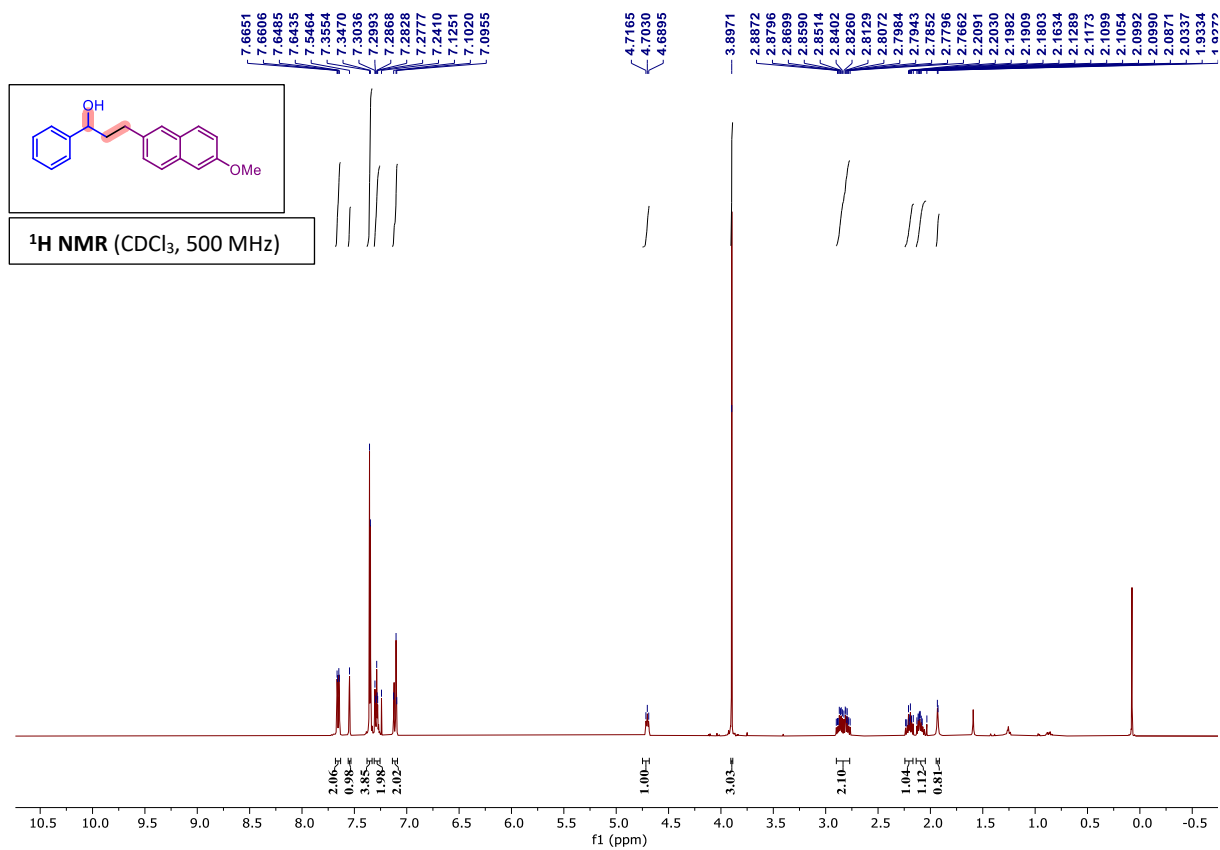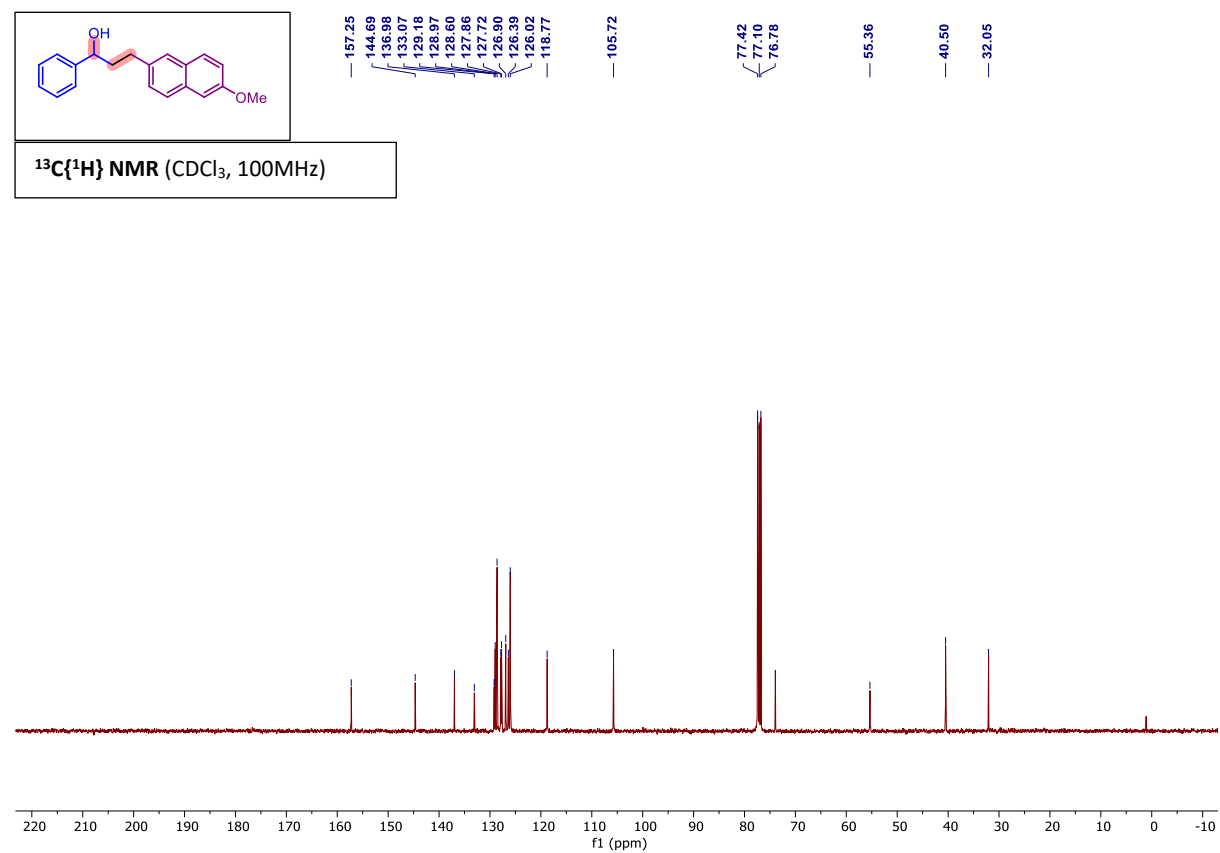

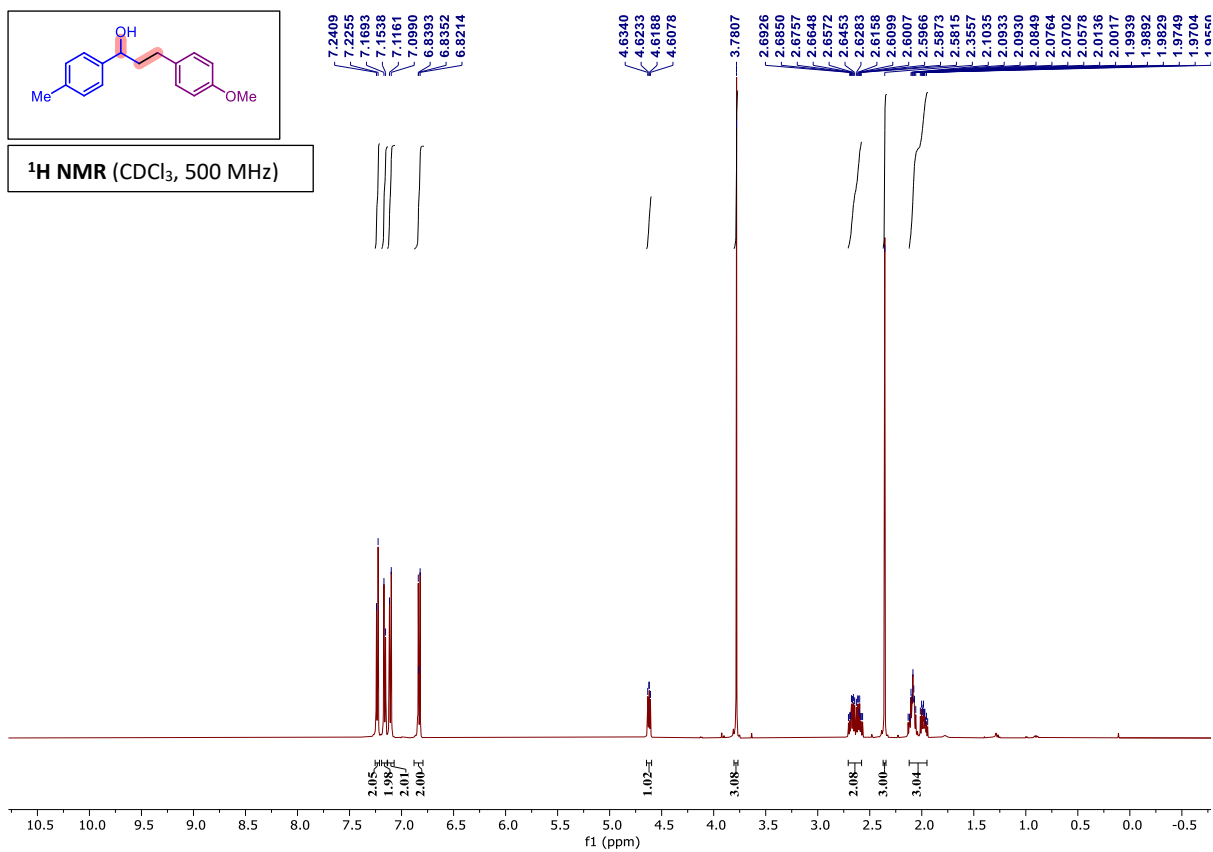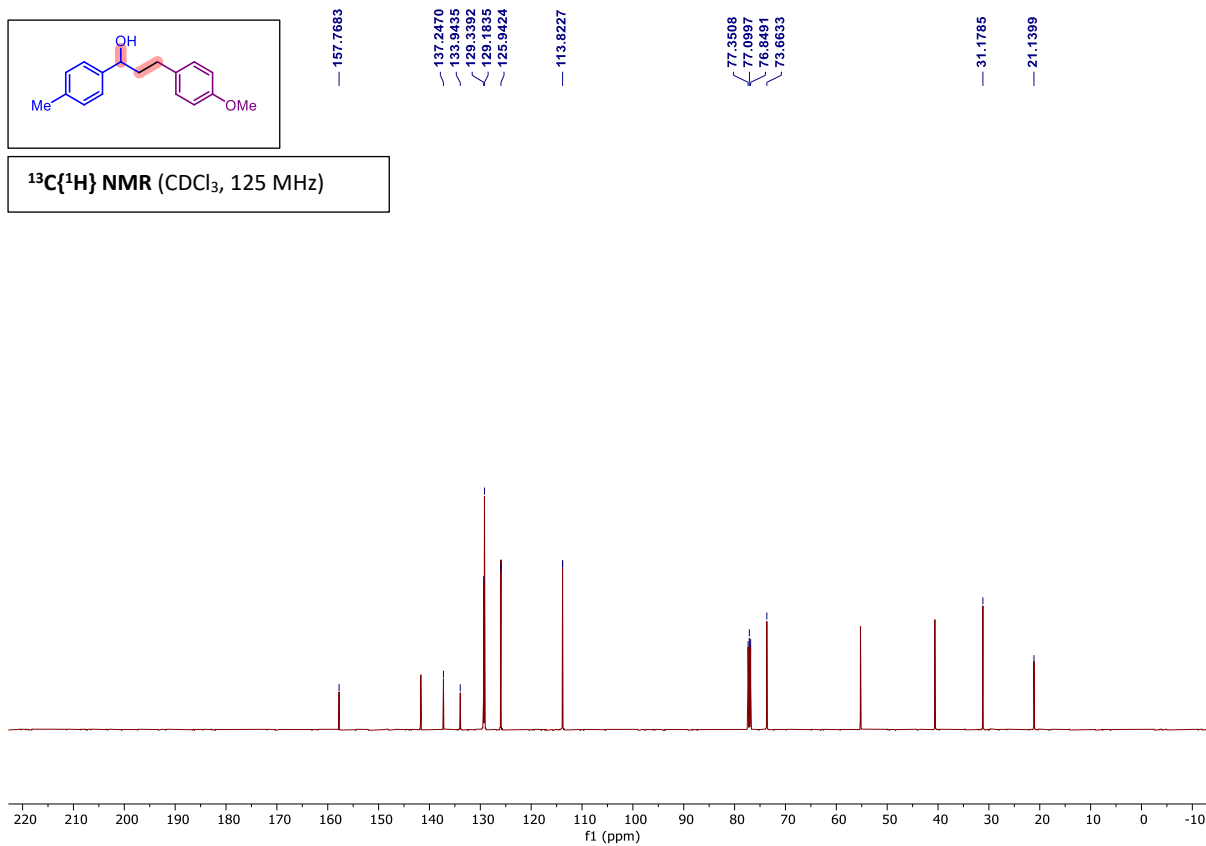

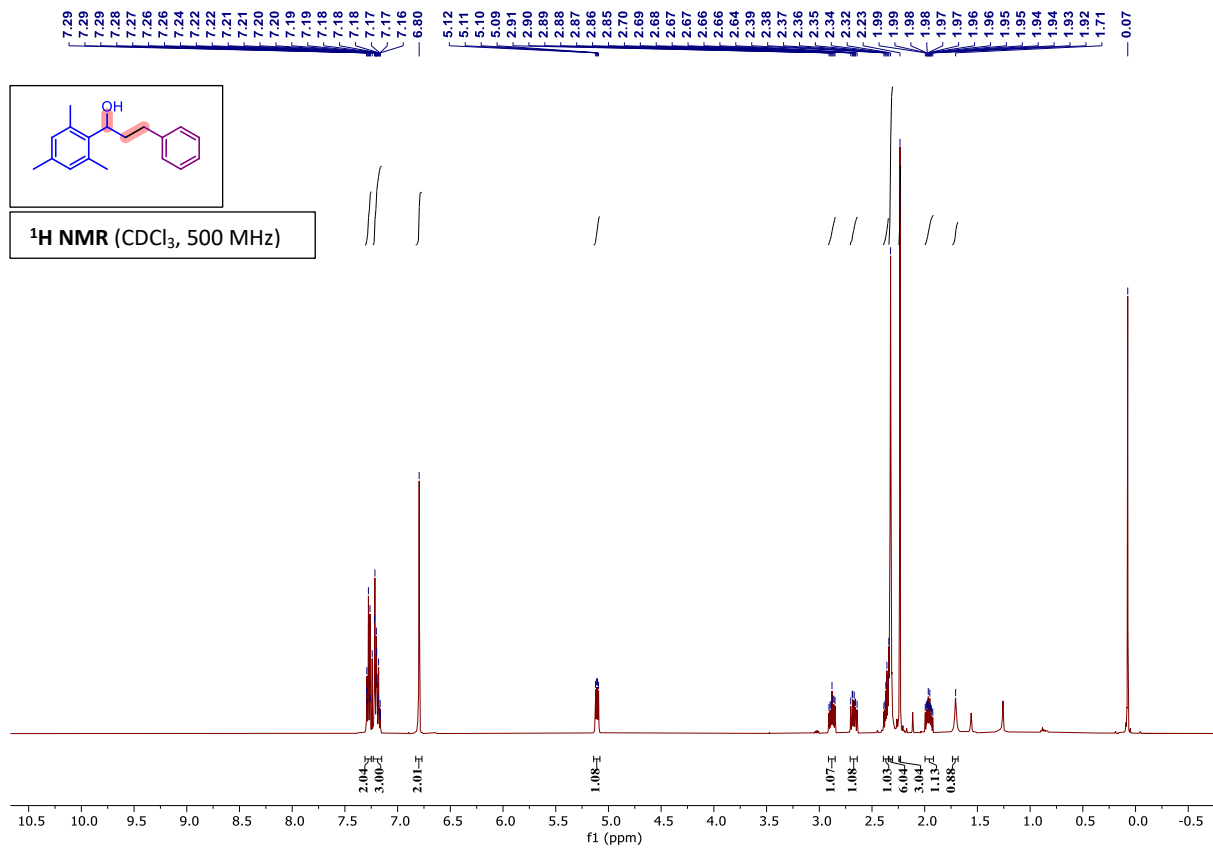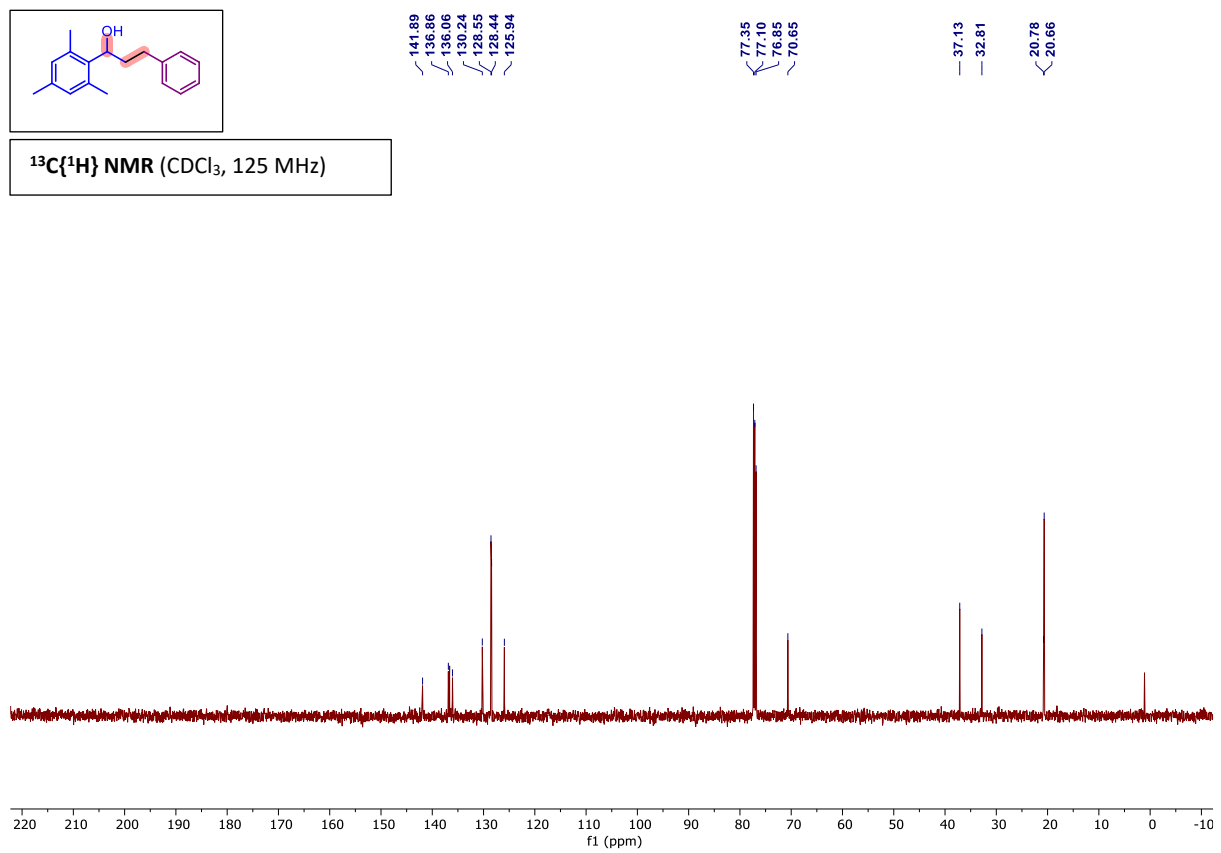

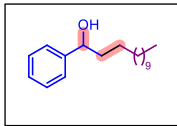

$^1\text{H NMR}$  ( $\text{CDCl}_3$ , 500 MHz)

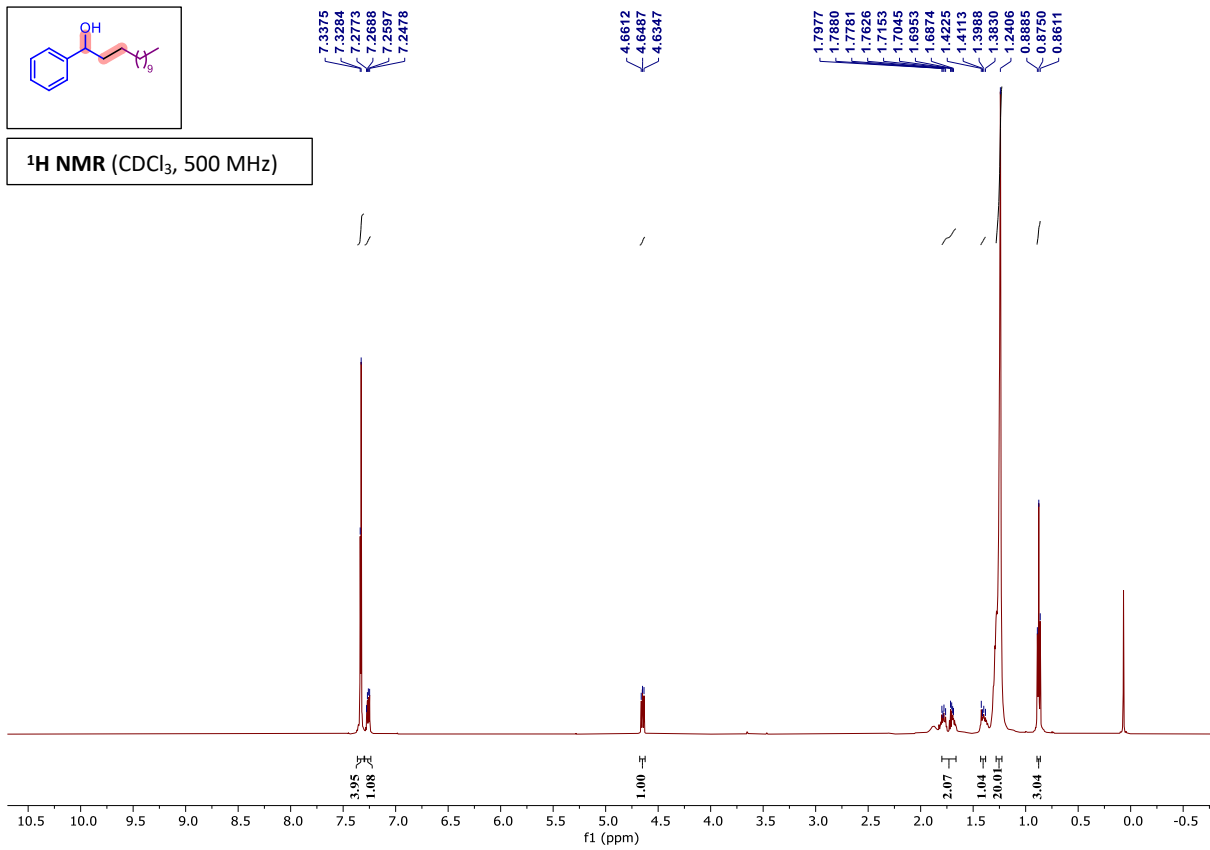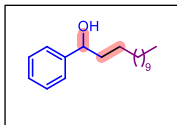

$^{13}\text{C}\{^1\text{H}\}$  NMR ( $\text{CDCl}_3$ , 125 MHz)

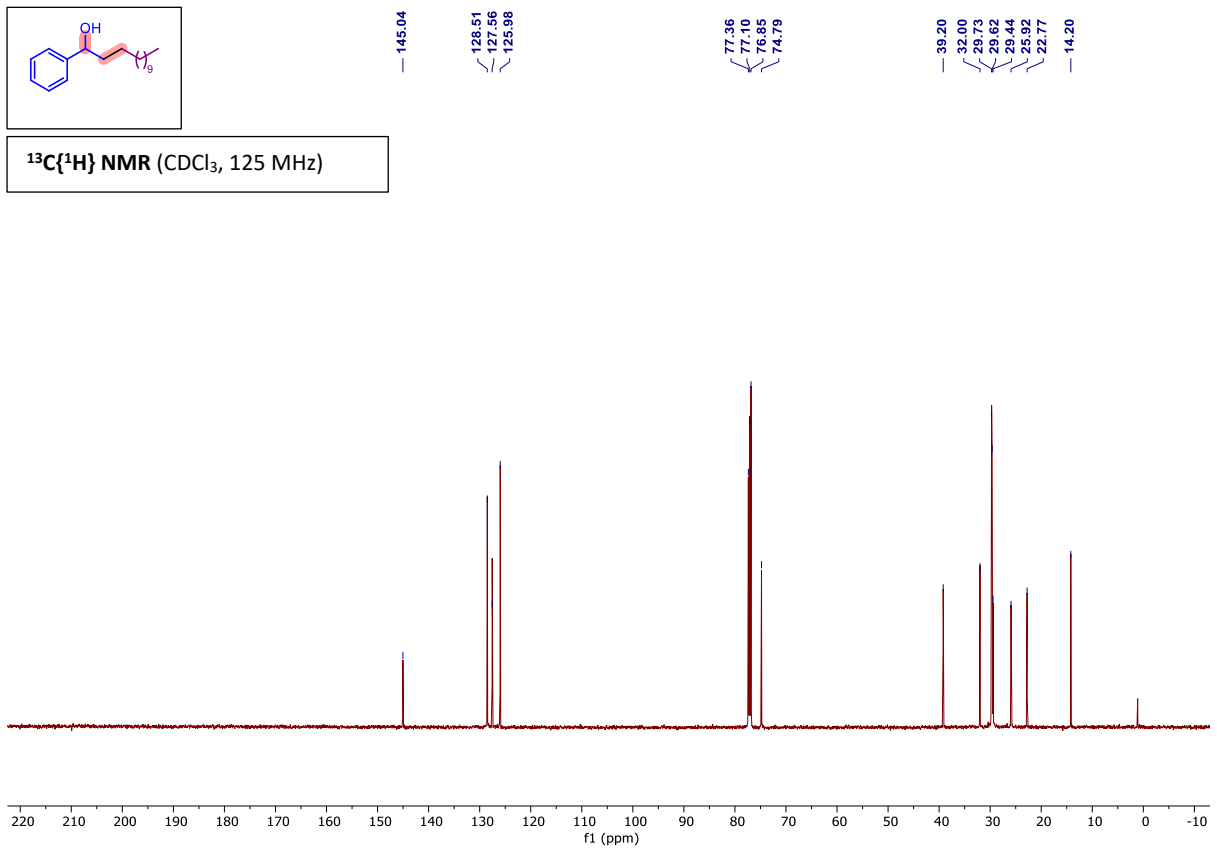

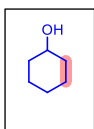

$^1\text{H NMR}$  ( $\text{CDCl}_3$ , 400 MHz)

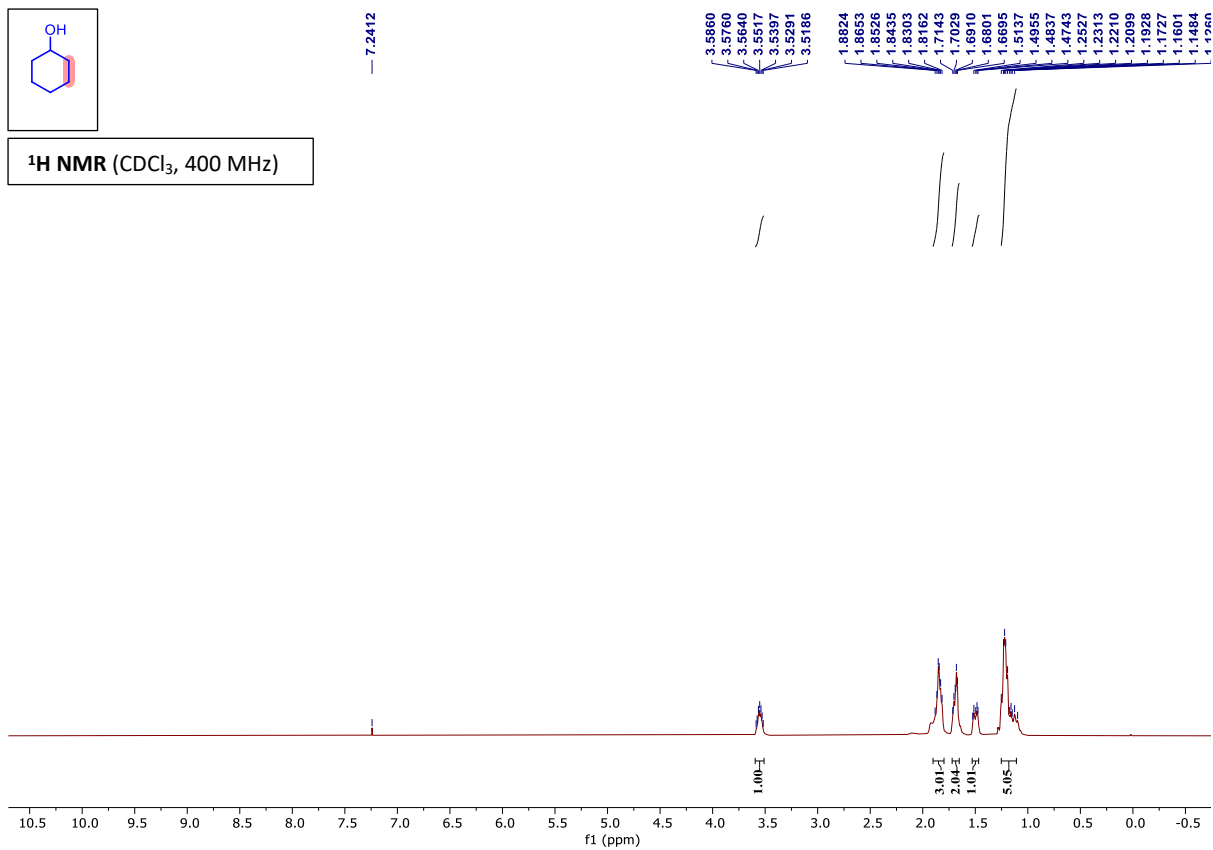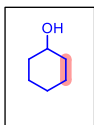

$^{13}\text{C}\{^1\text{H}\}$  NMR ( $\text{CDCl}_3$ , 100 MHz)

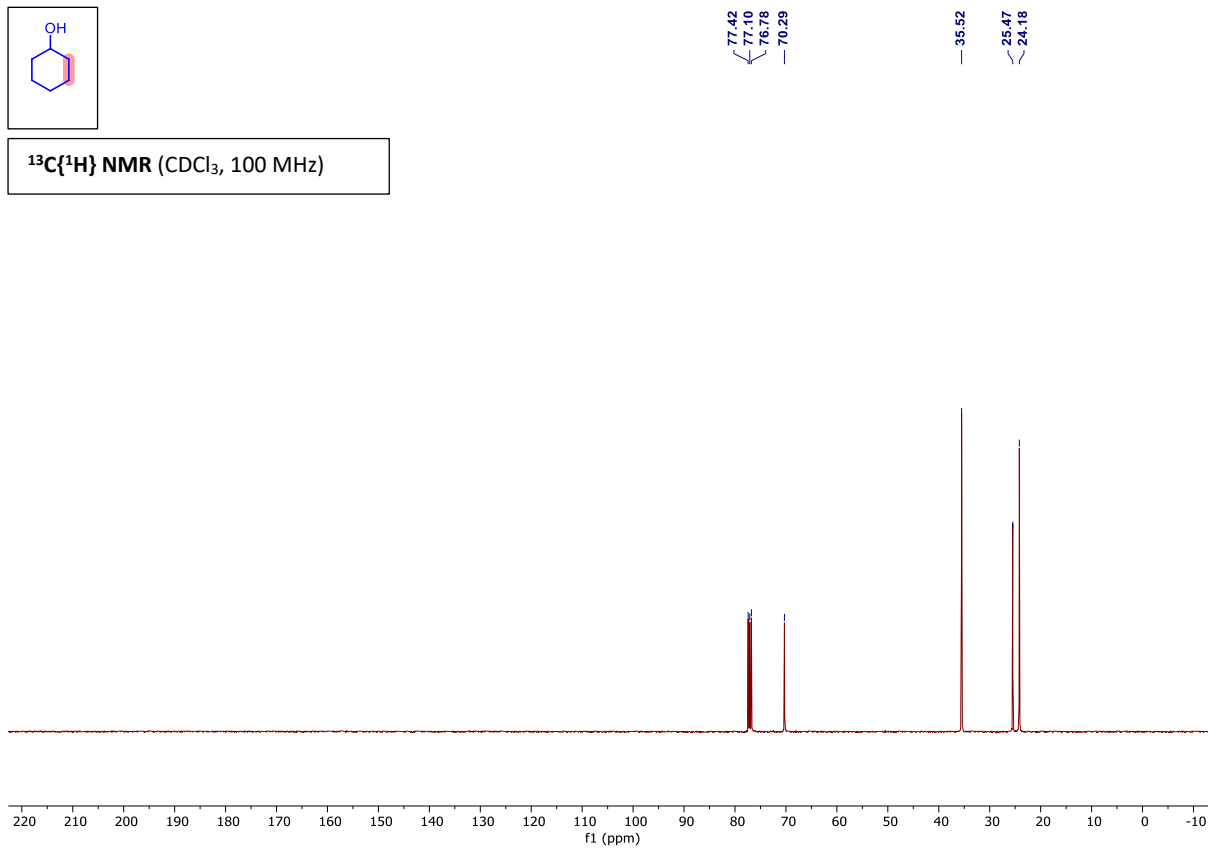

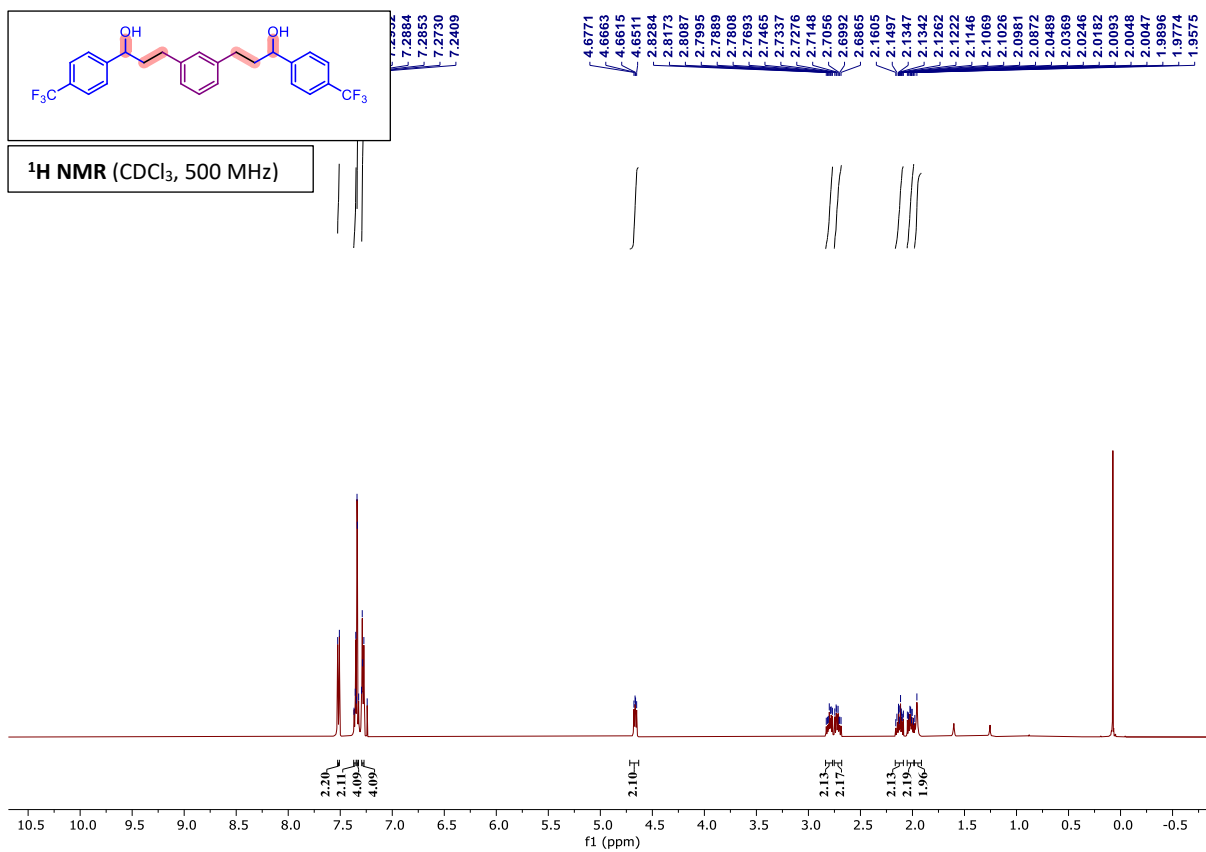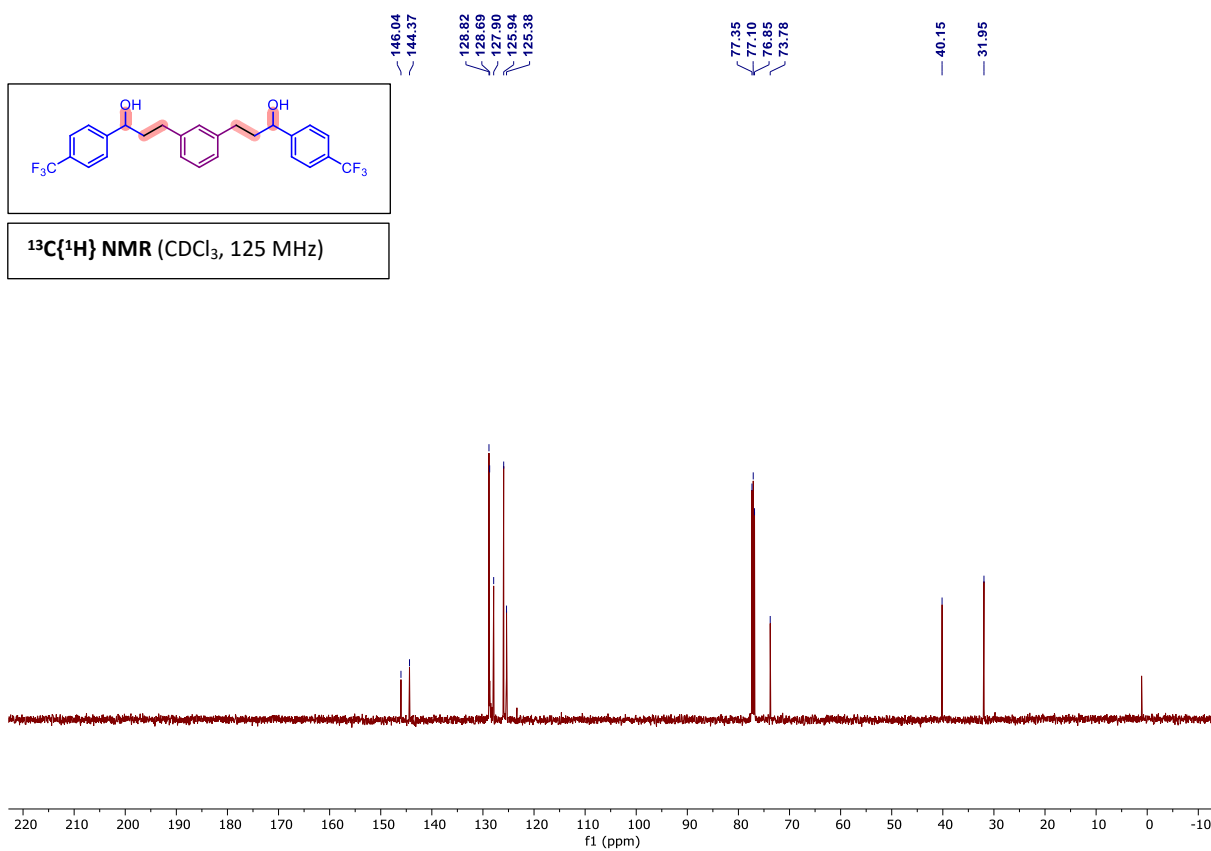

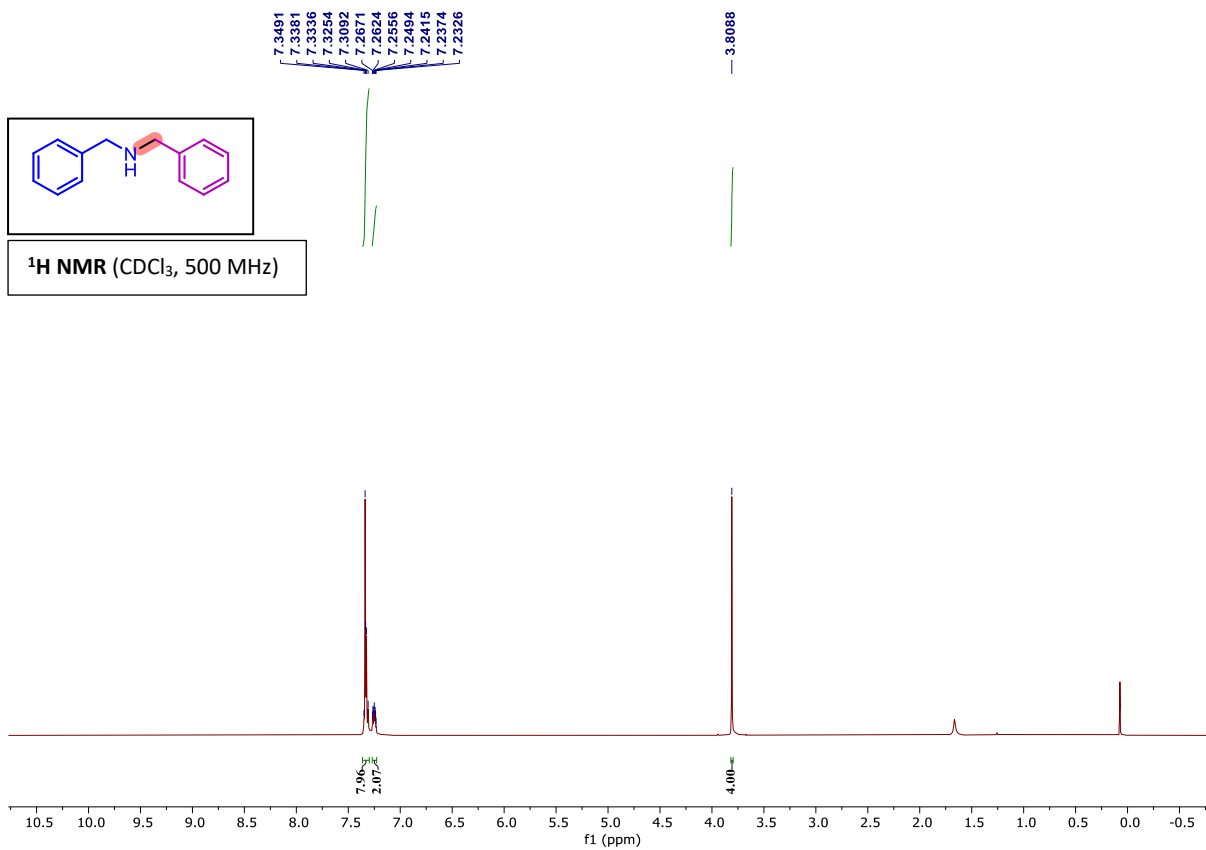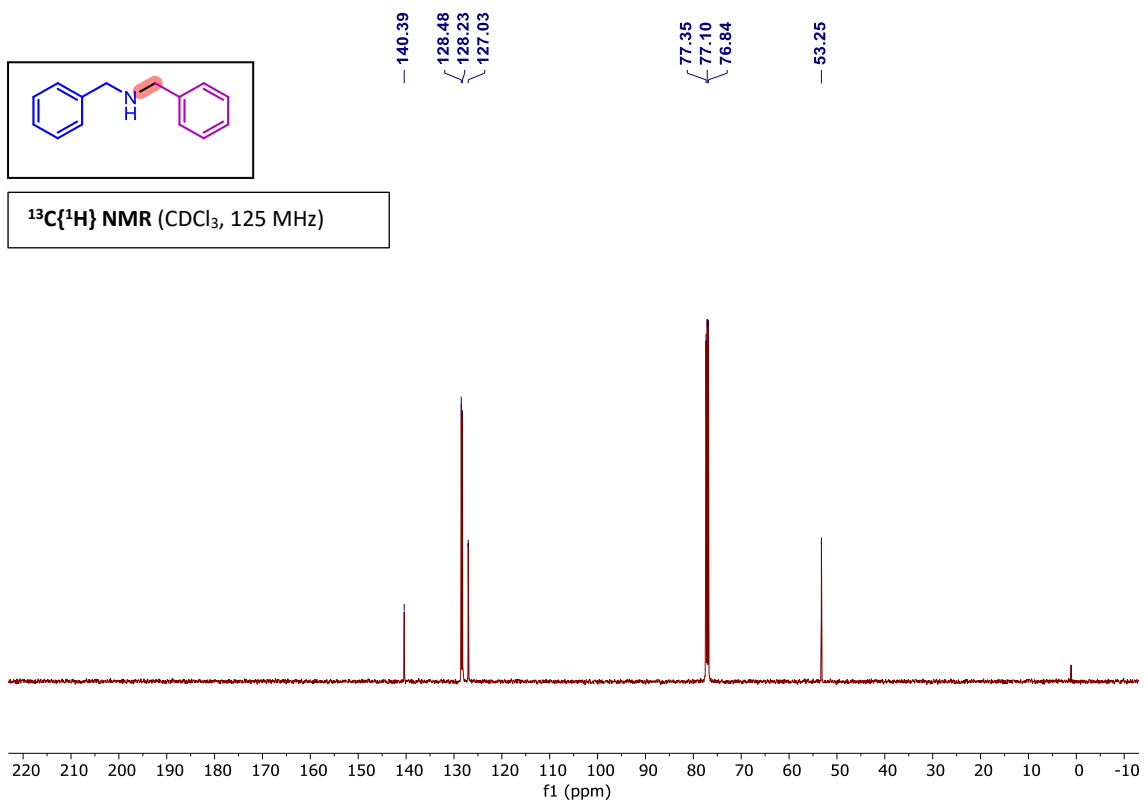

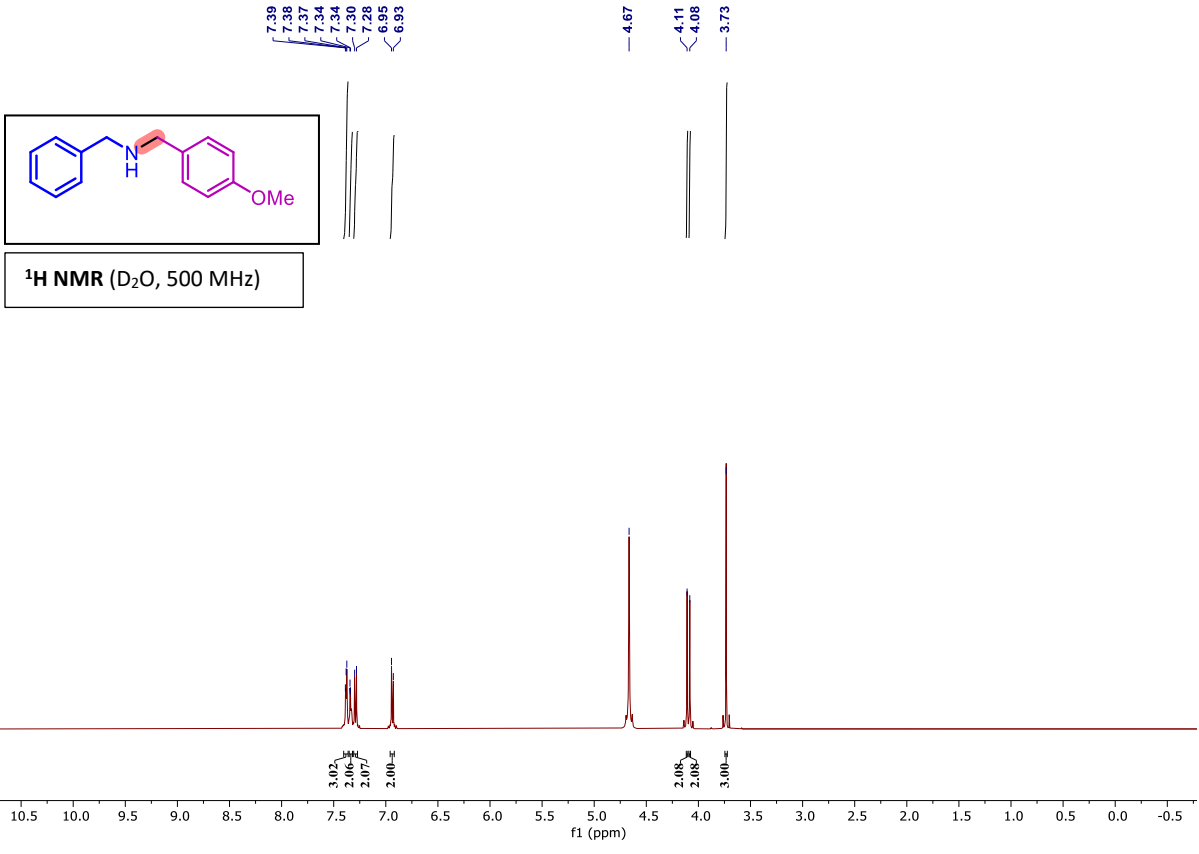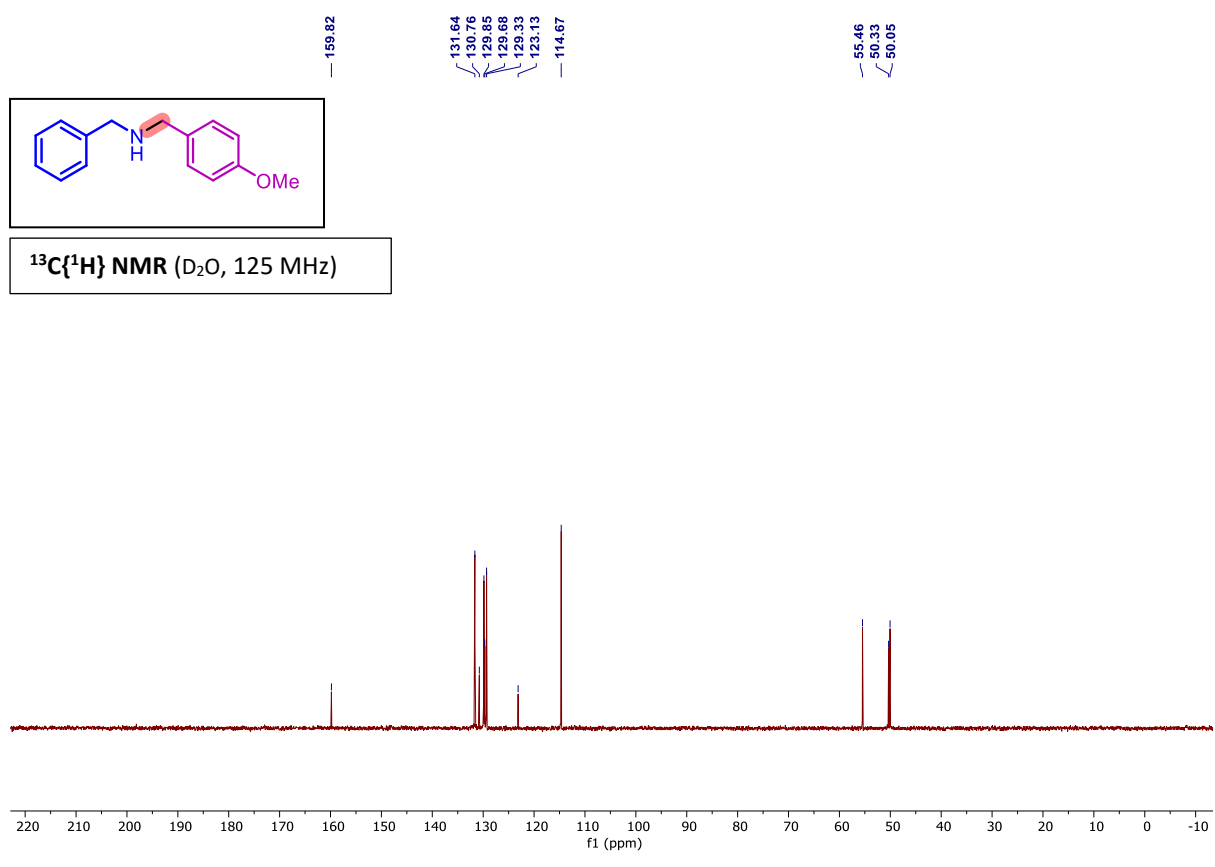



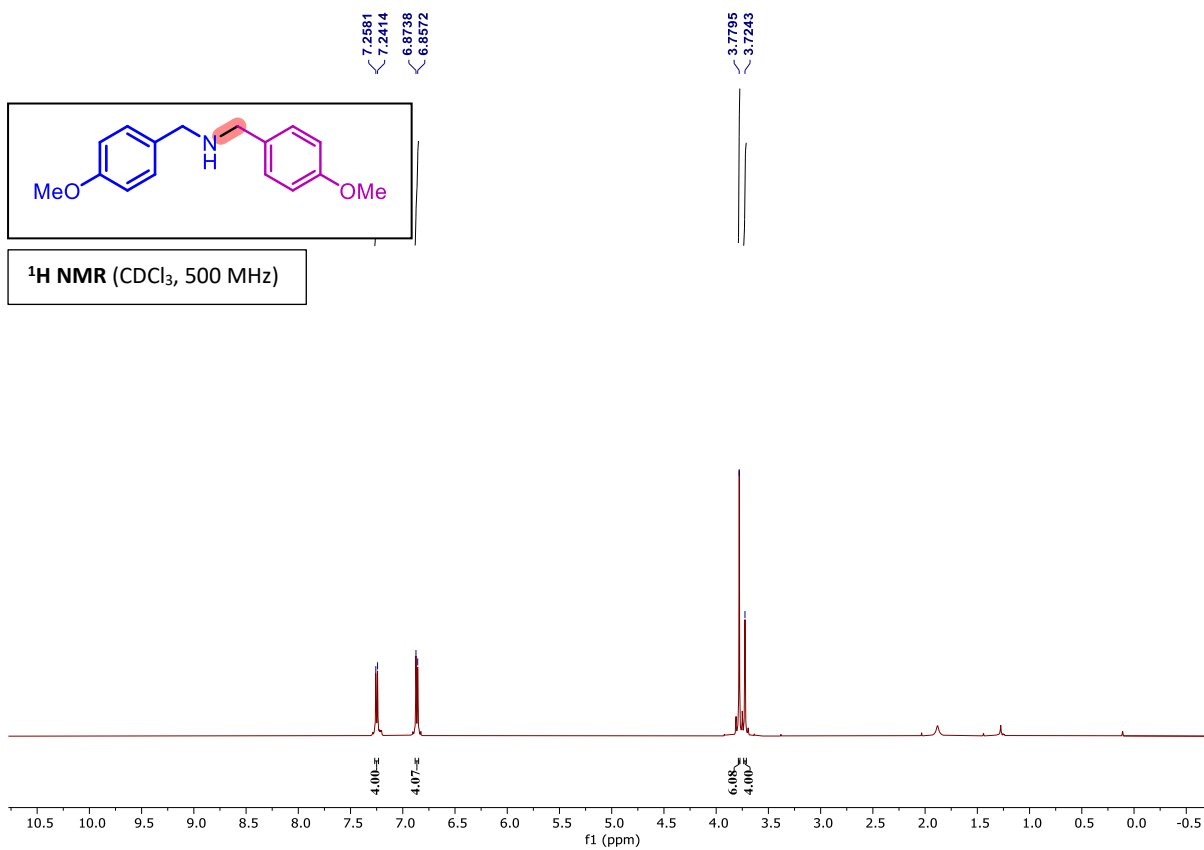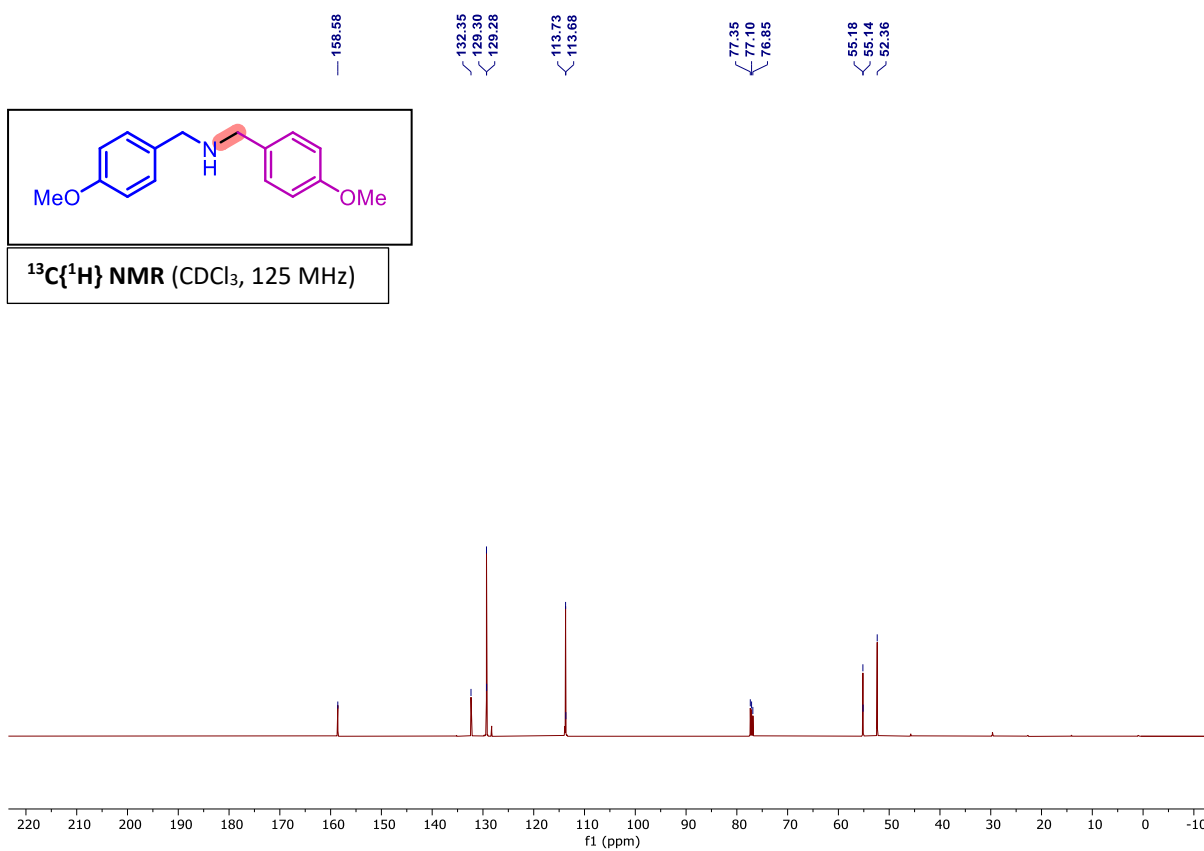

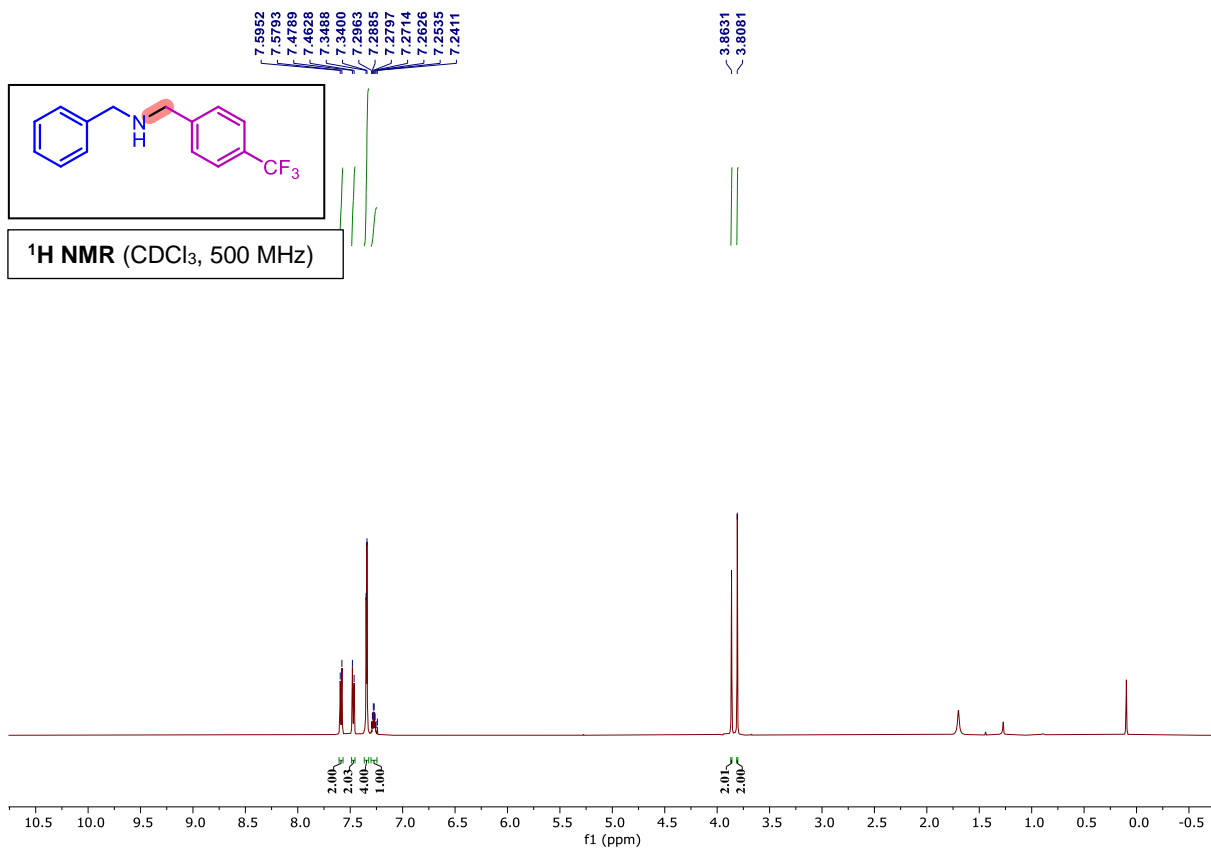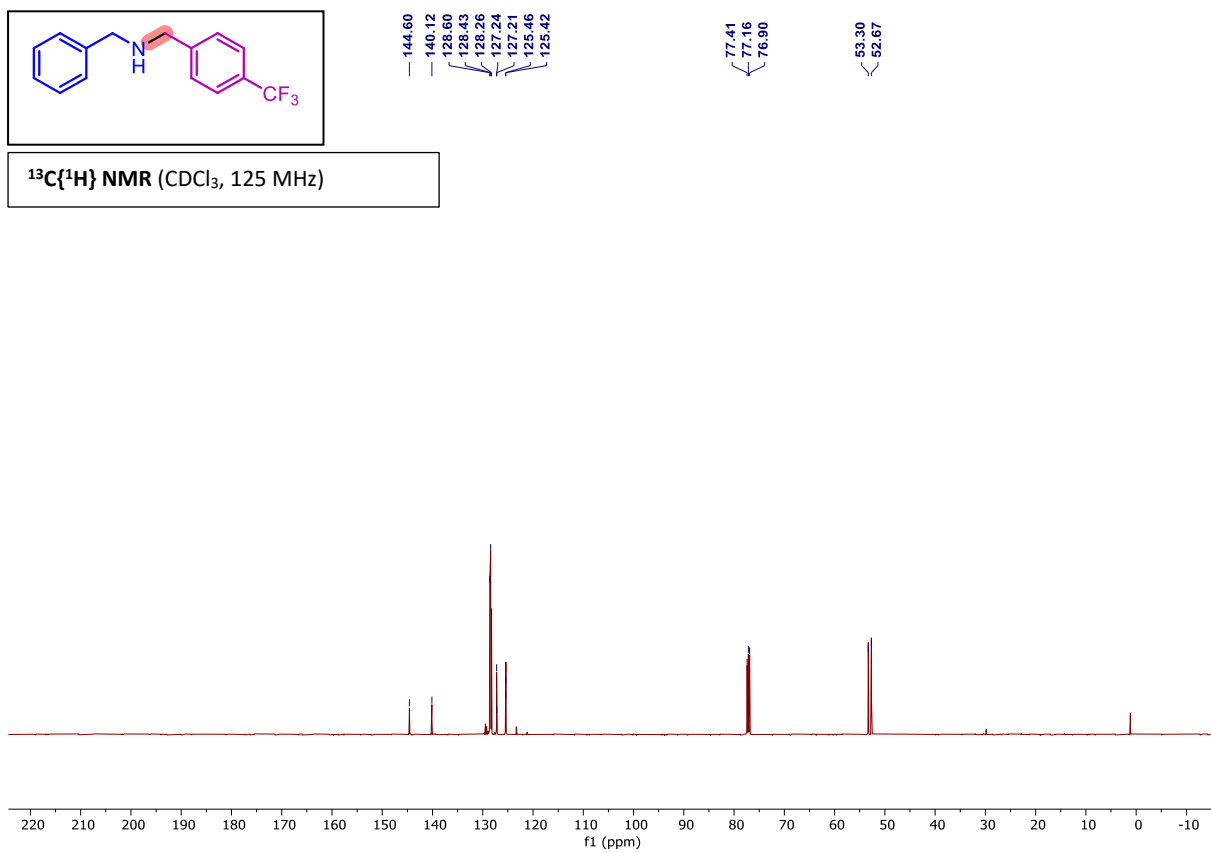

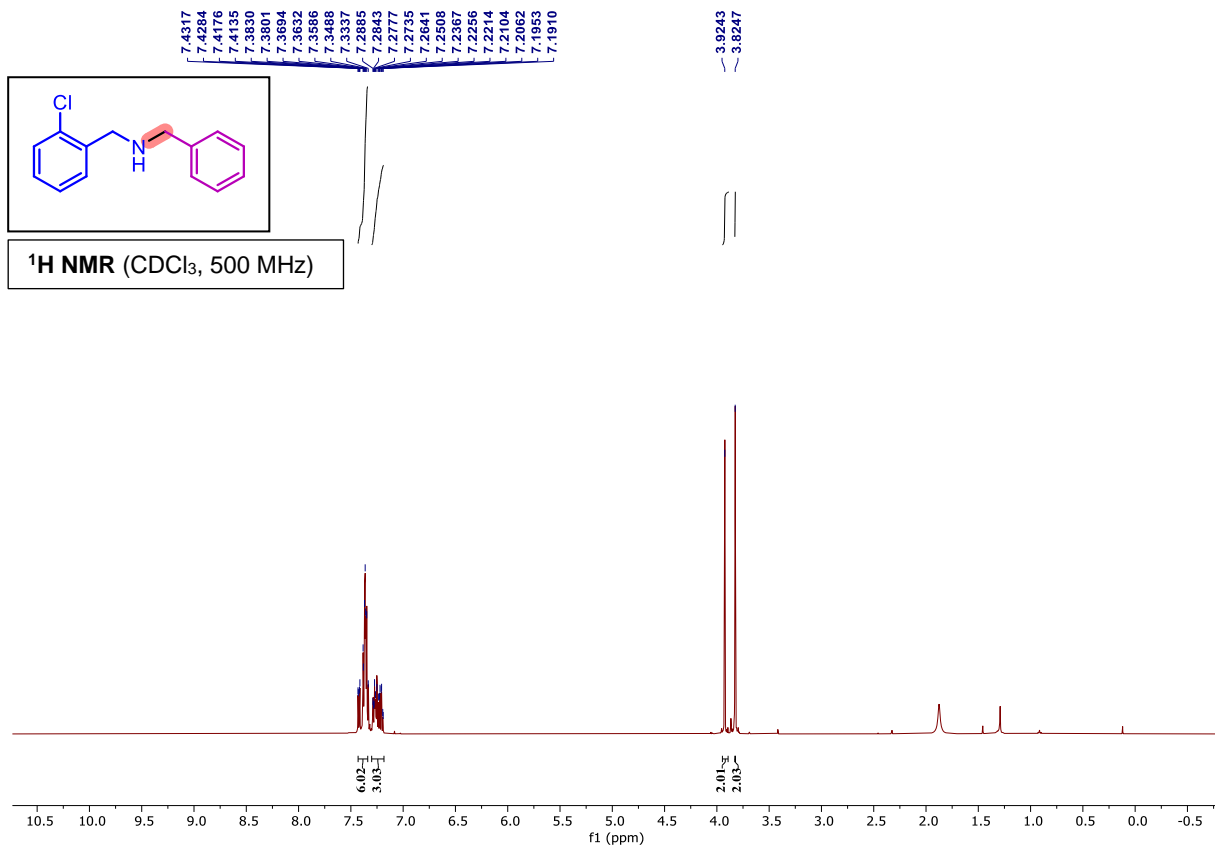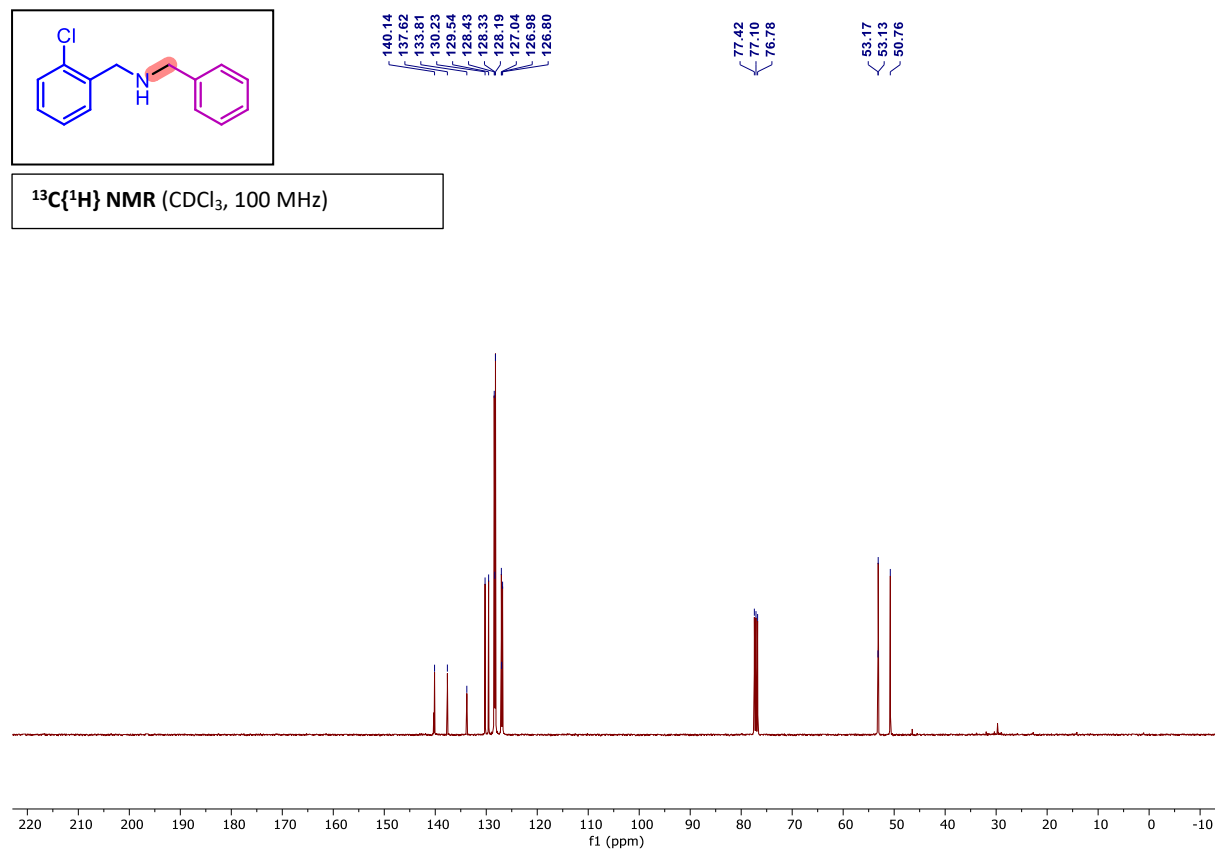

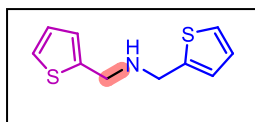

<sup>1</sup>H NMR (CDCl<sub>3</sub>, 500 MHz)

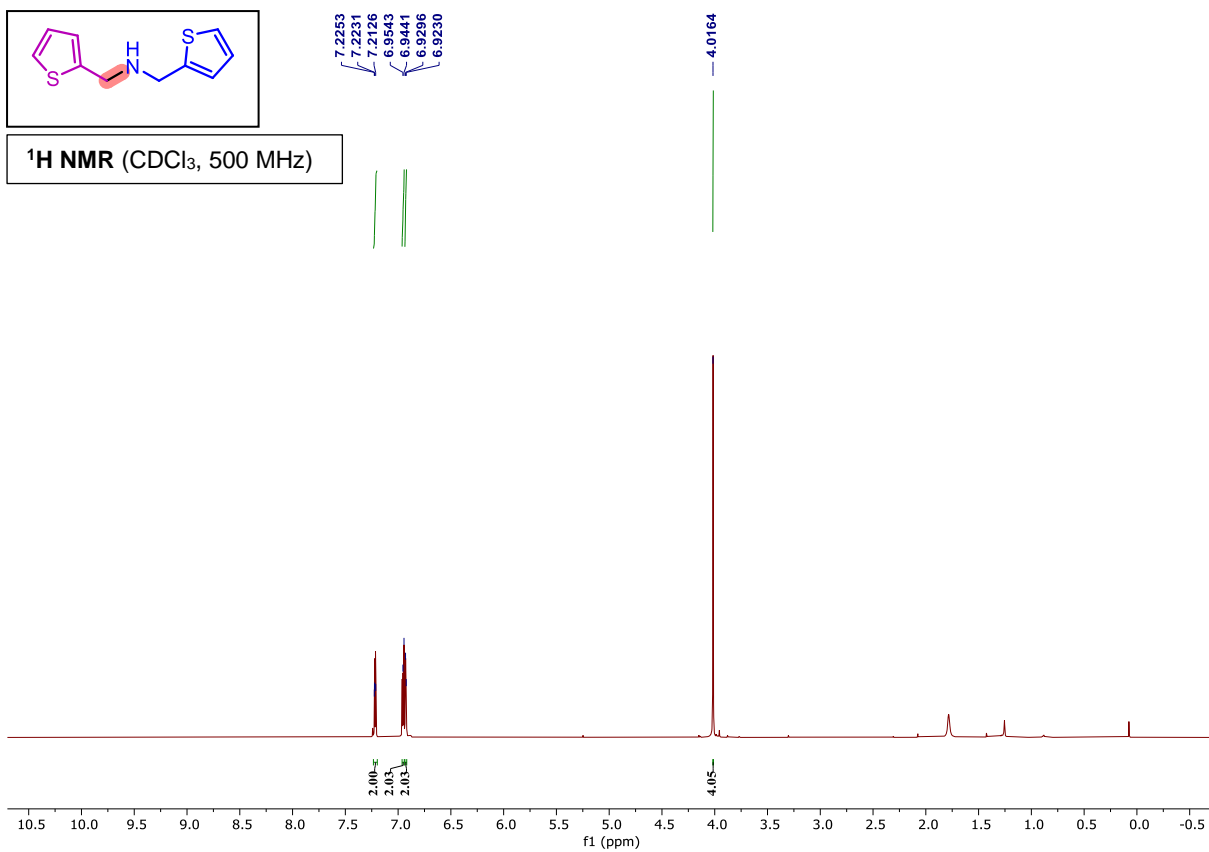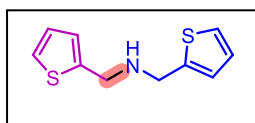

<sup>13</sup>C{<sup>1</sup>H} NMR (CDCl<sub>3</sub>, 125 MHz)

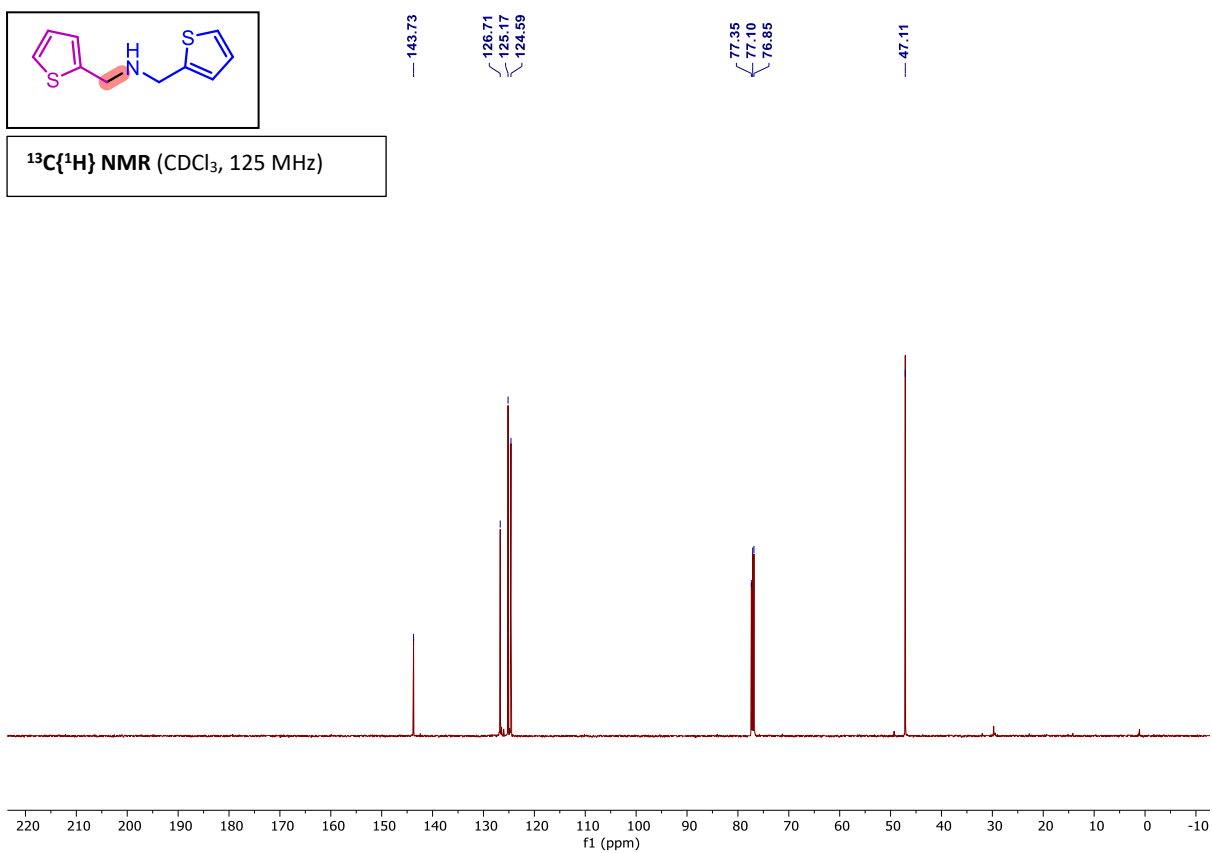

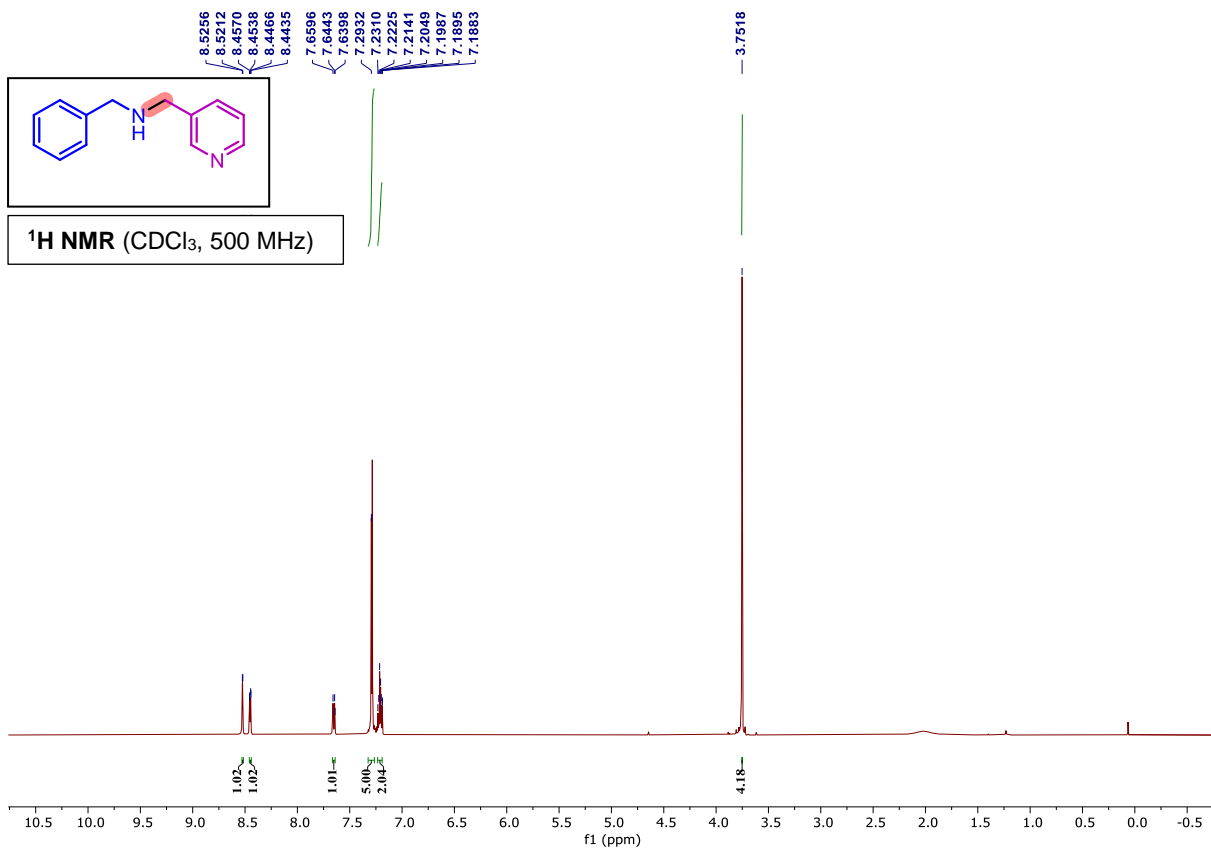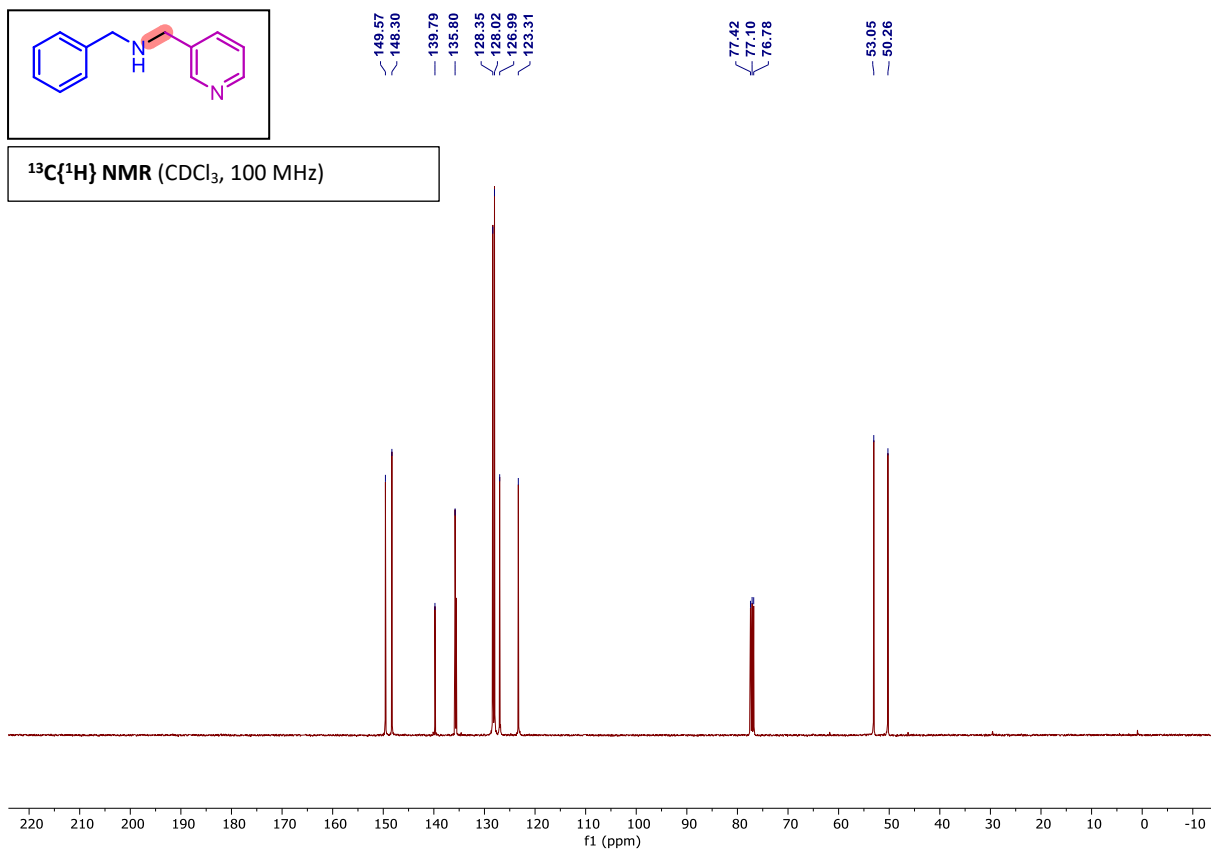

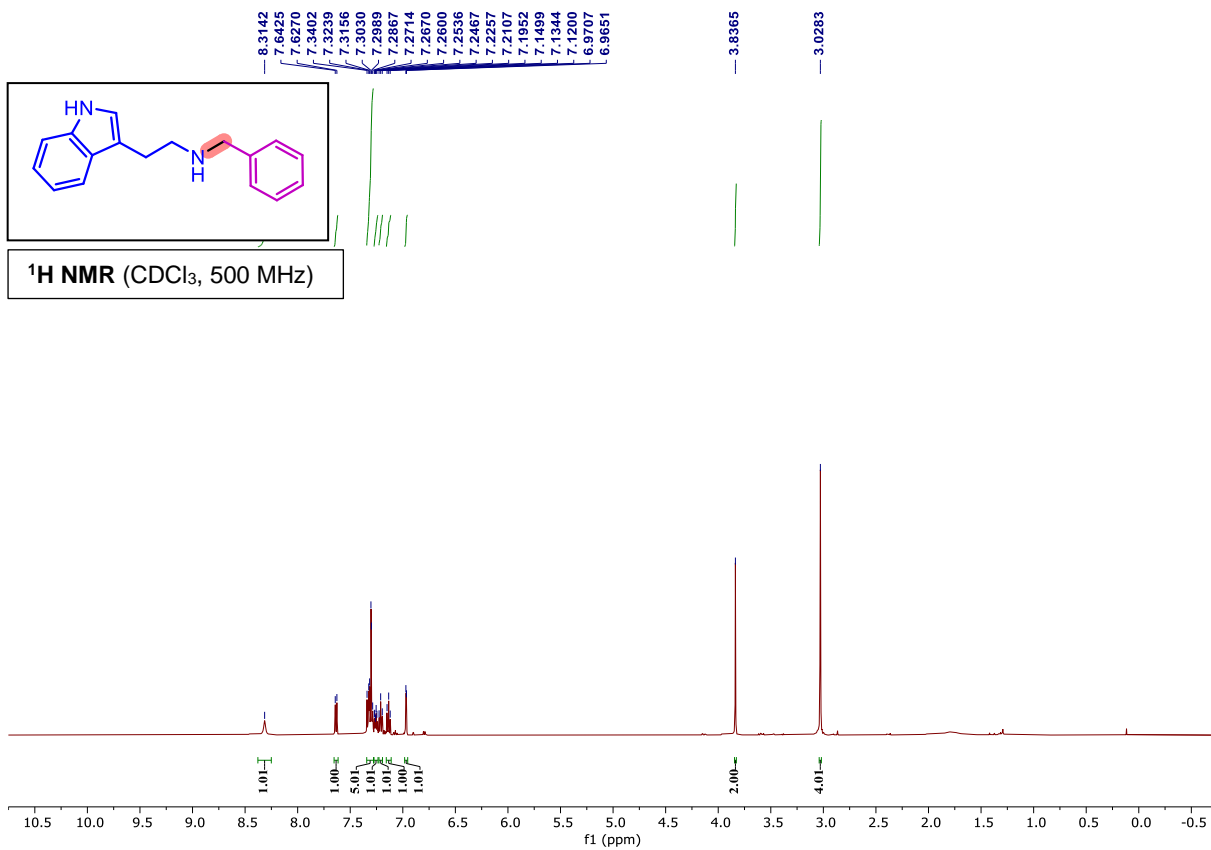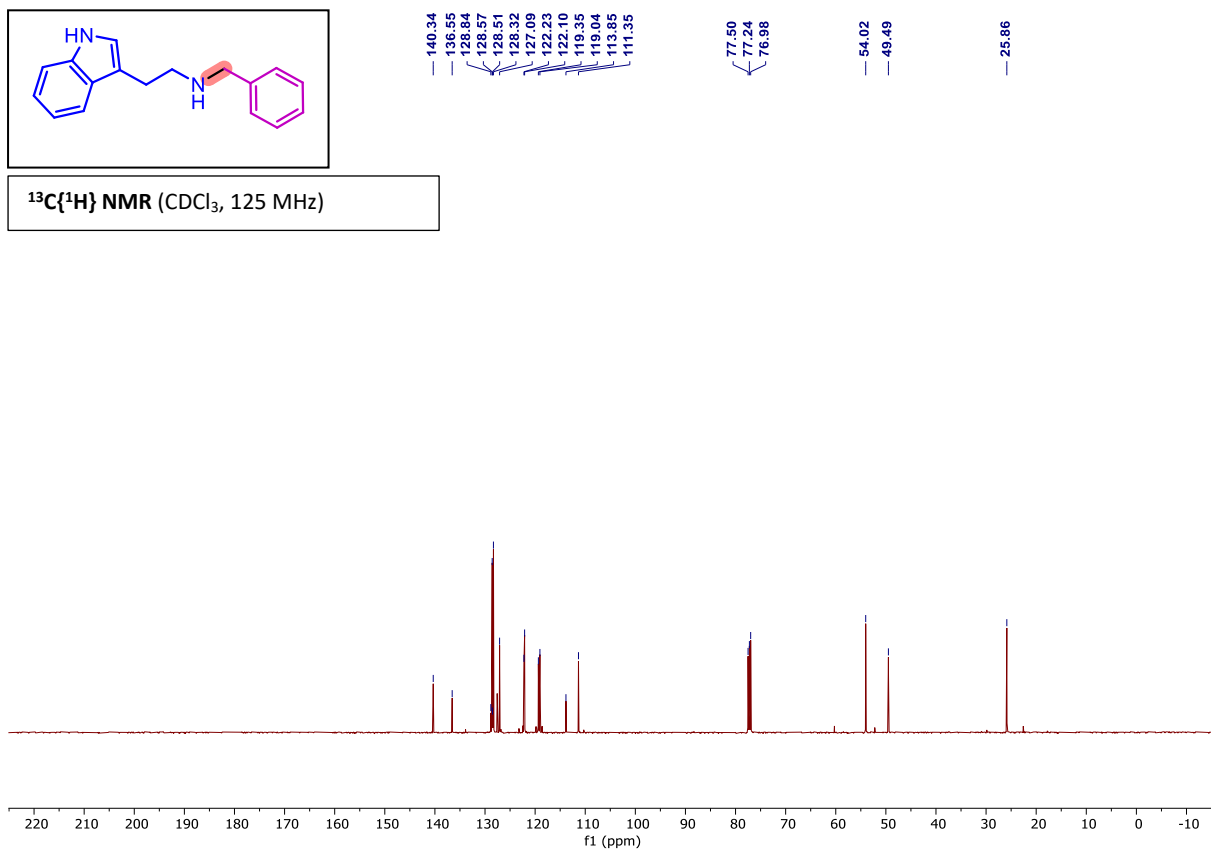

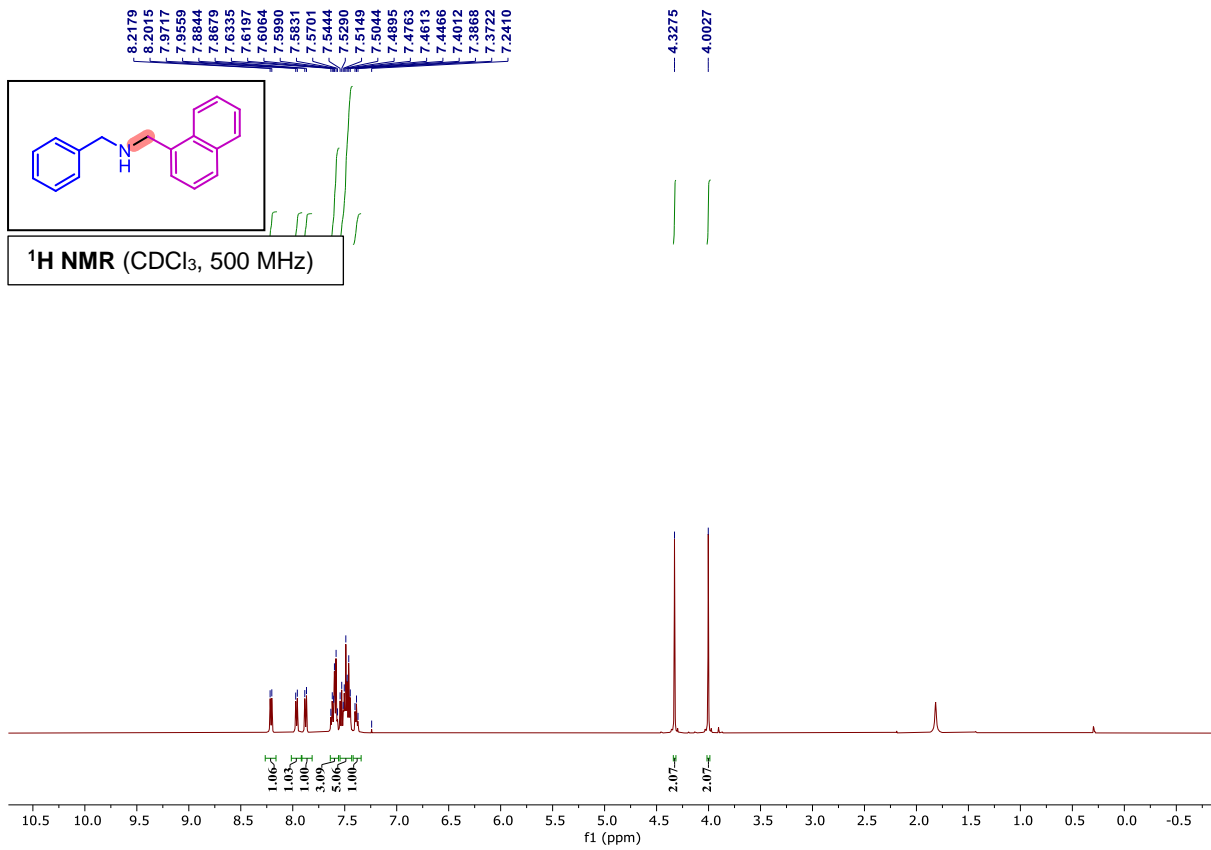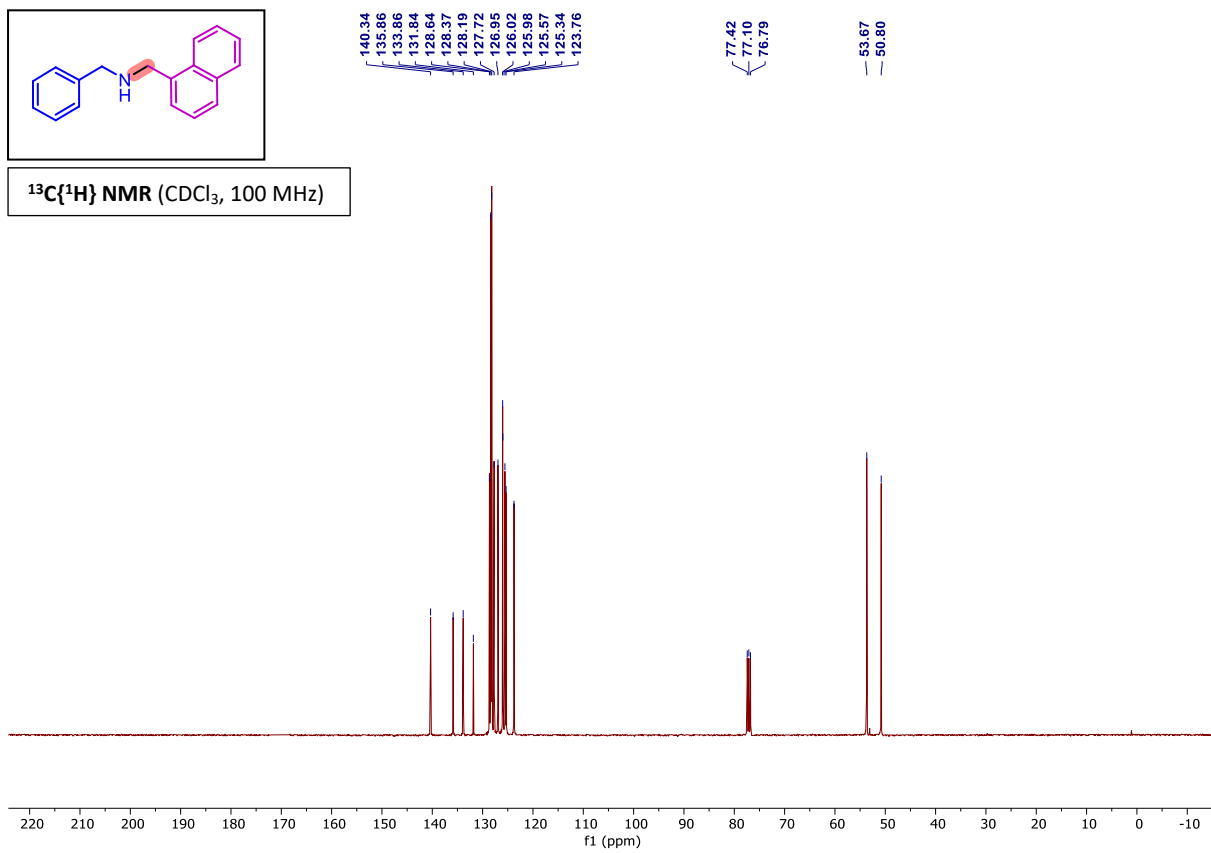

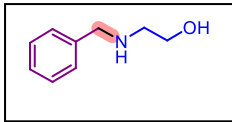

<sup>1</sup>H NMR (CDCl<sub>3</sub>, 500 MHz)

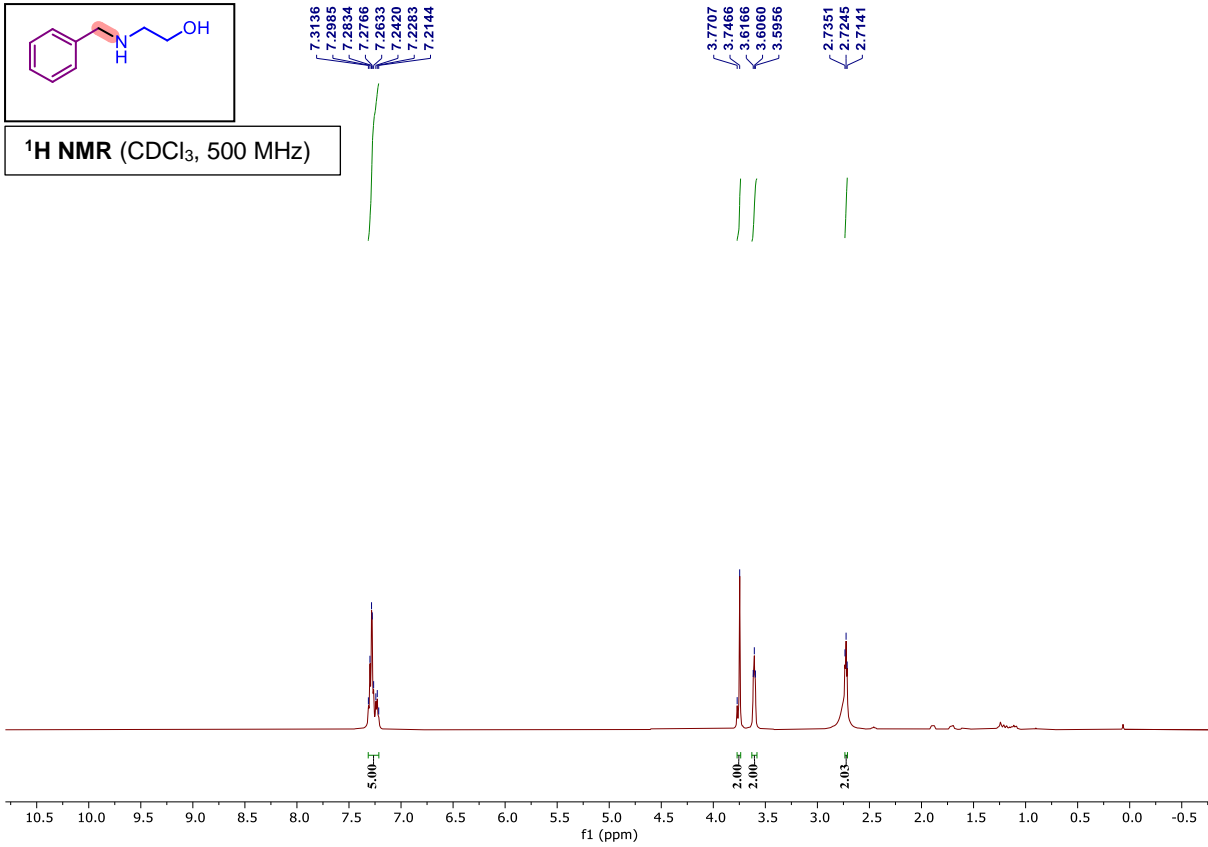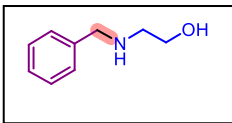

<sup>13</sup>C{<sup>1</sup>H} NMR (CDCl<sub>3</sub>, 125 MHz)

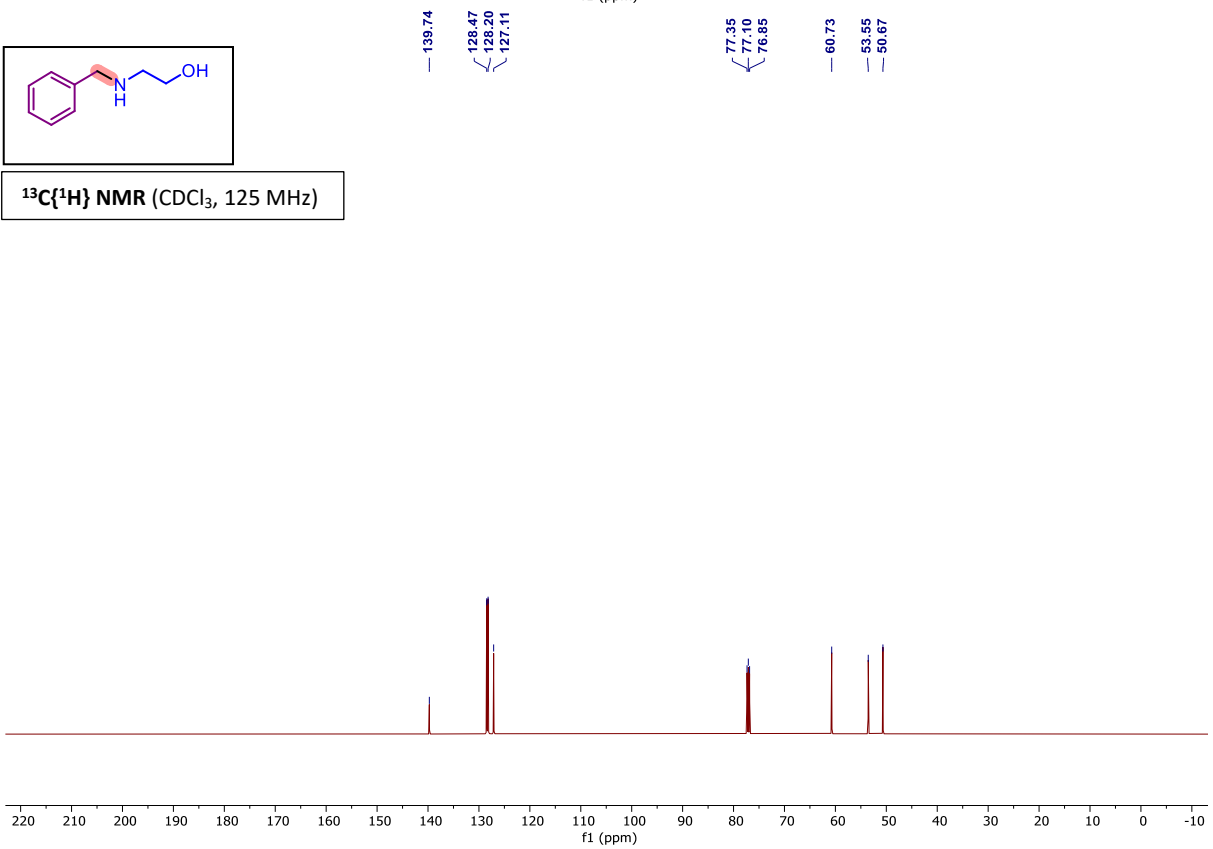



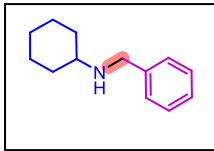

$^1\text{H NMR}$  ( $\text{CDCl}_3$ , 500 MHz)

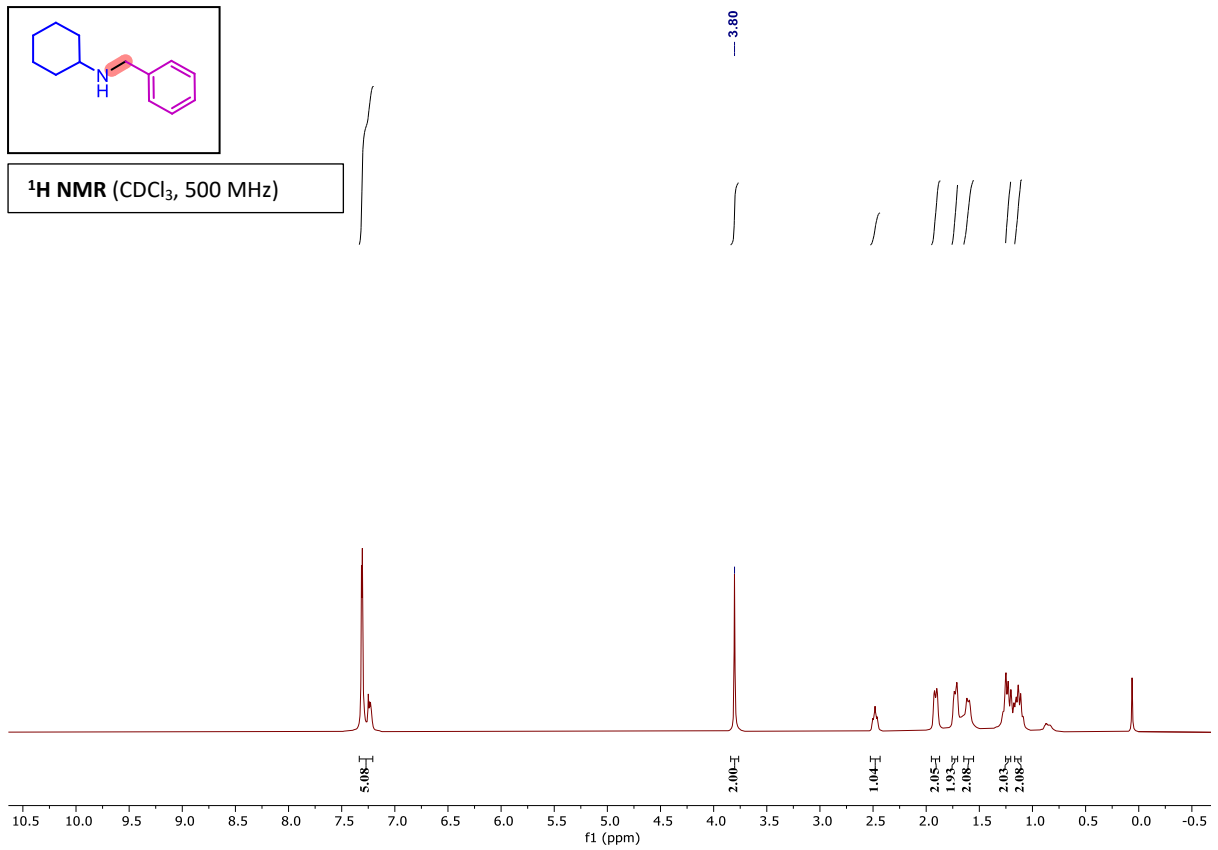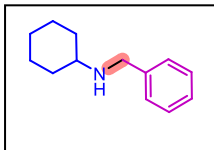

$^{13}\text{C}\{^1\text{H}\}$  NMR ( $\text{CDCl}_3$ , 125 MHz)

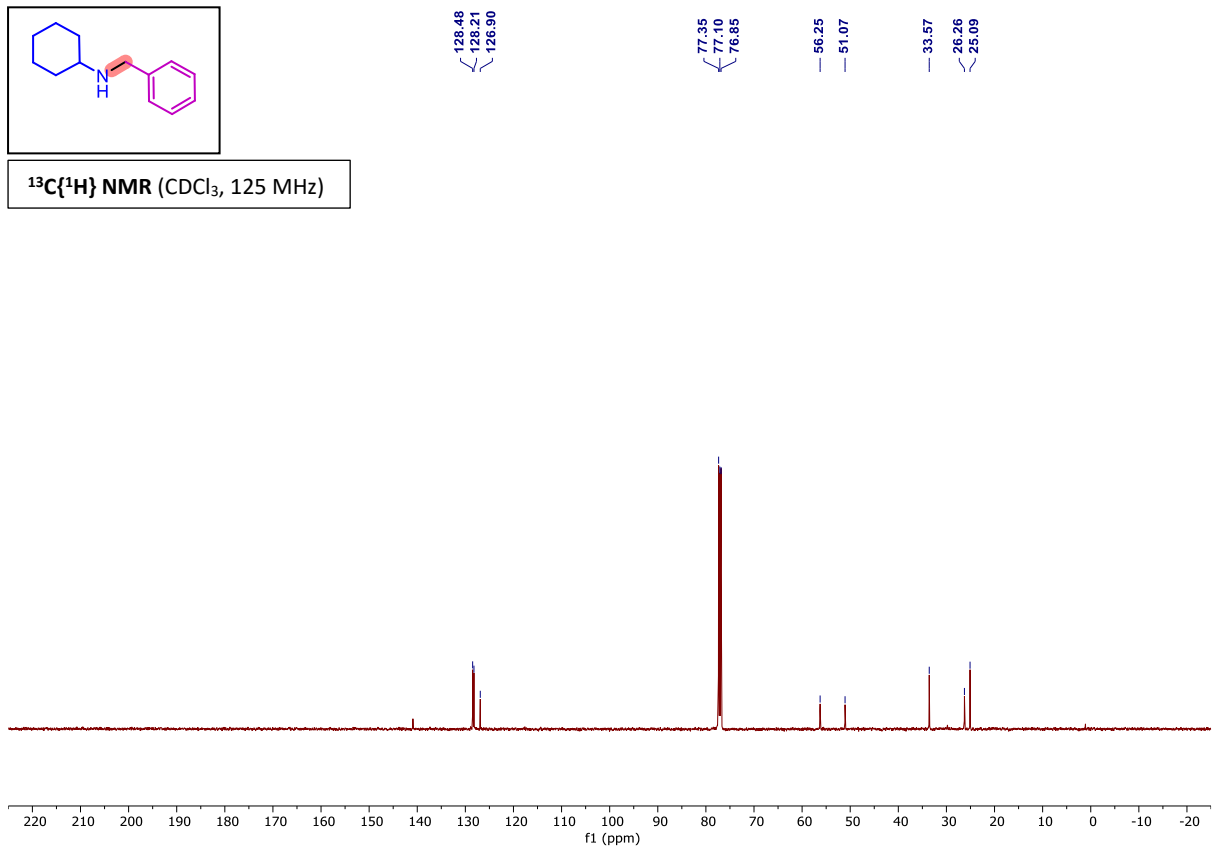

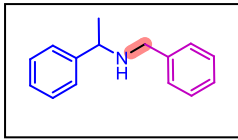

$^1\text{H NMR}$  ( $\text{CDCl}_3$ , 500 MHz)

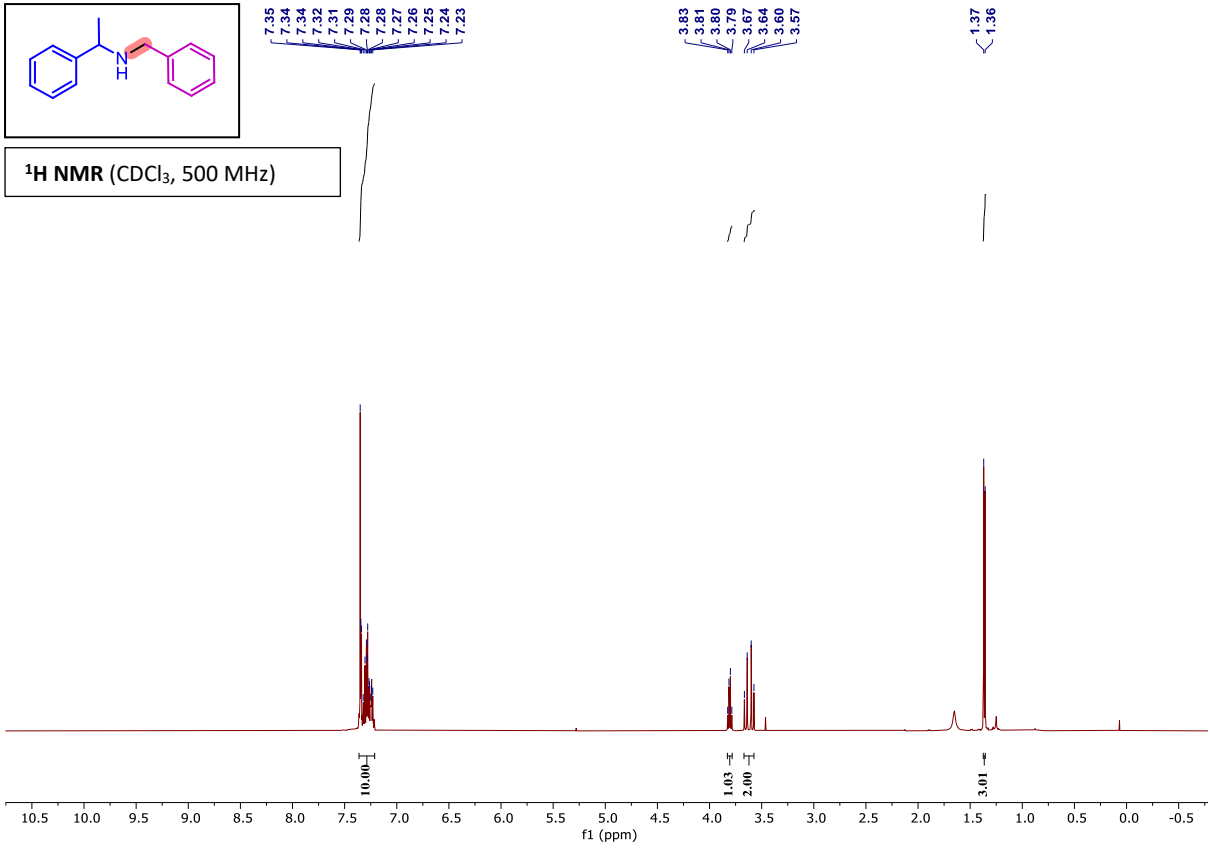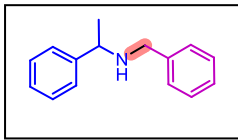

$^{13}\text{C}\{^1\text{H}\}$  NMR ( $\text{CDCl}_3$ , 125 MHz)

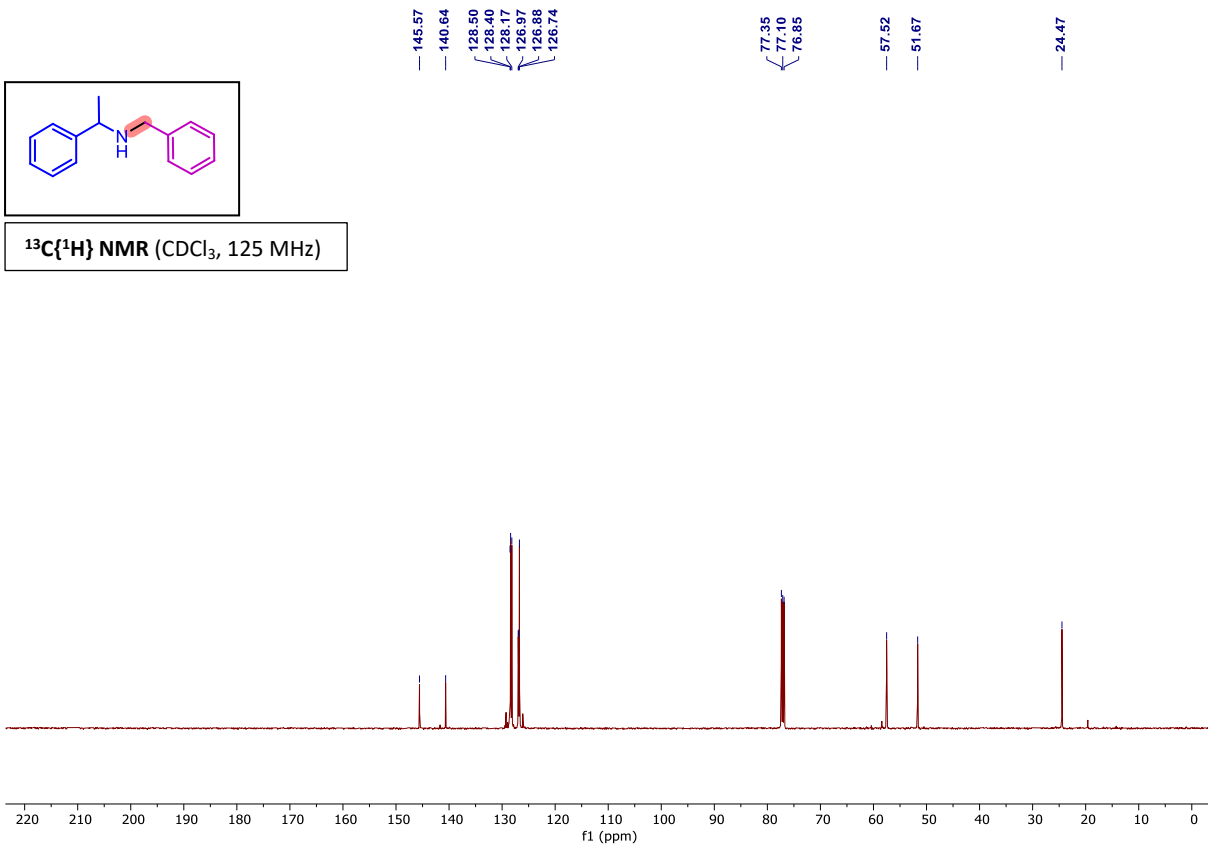

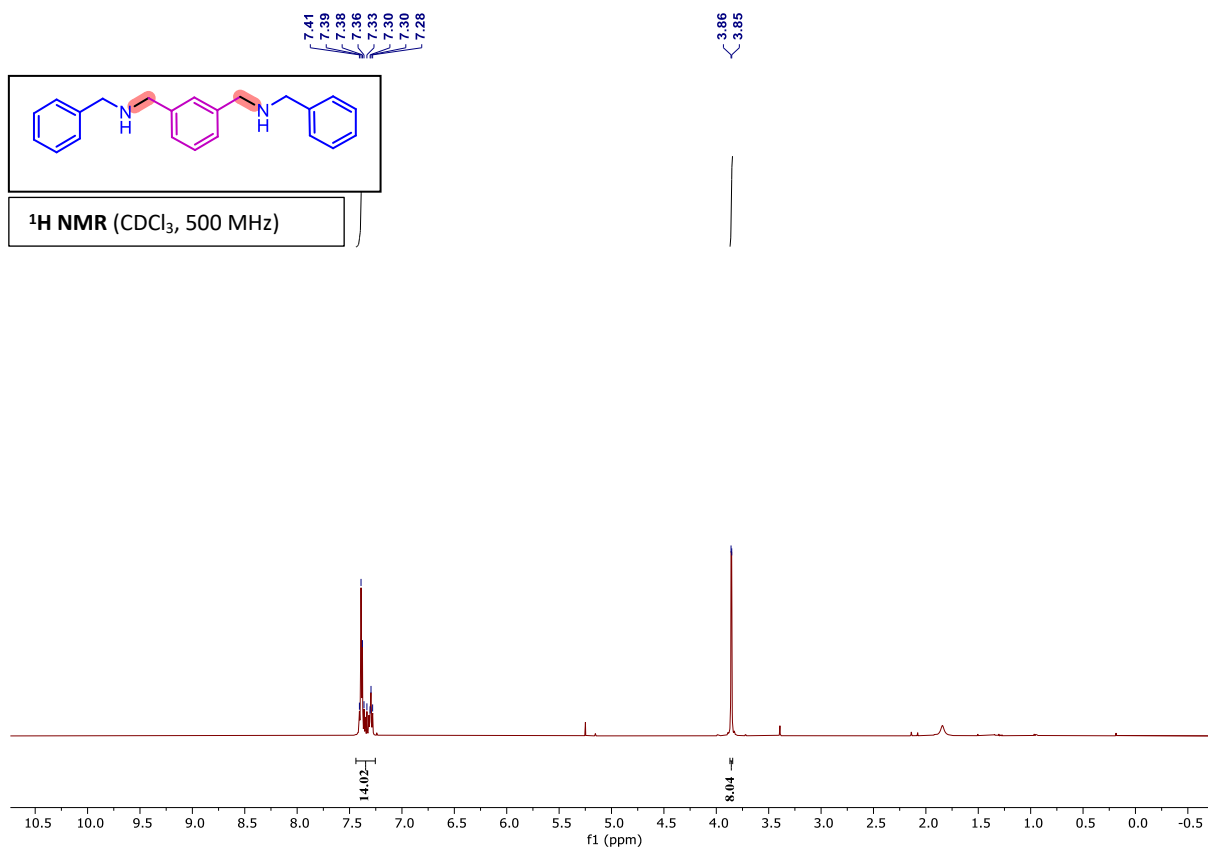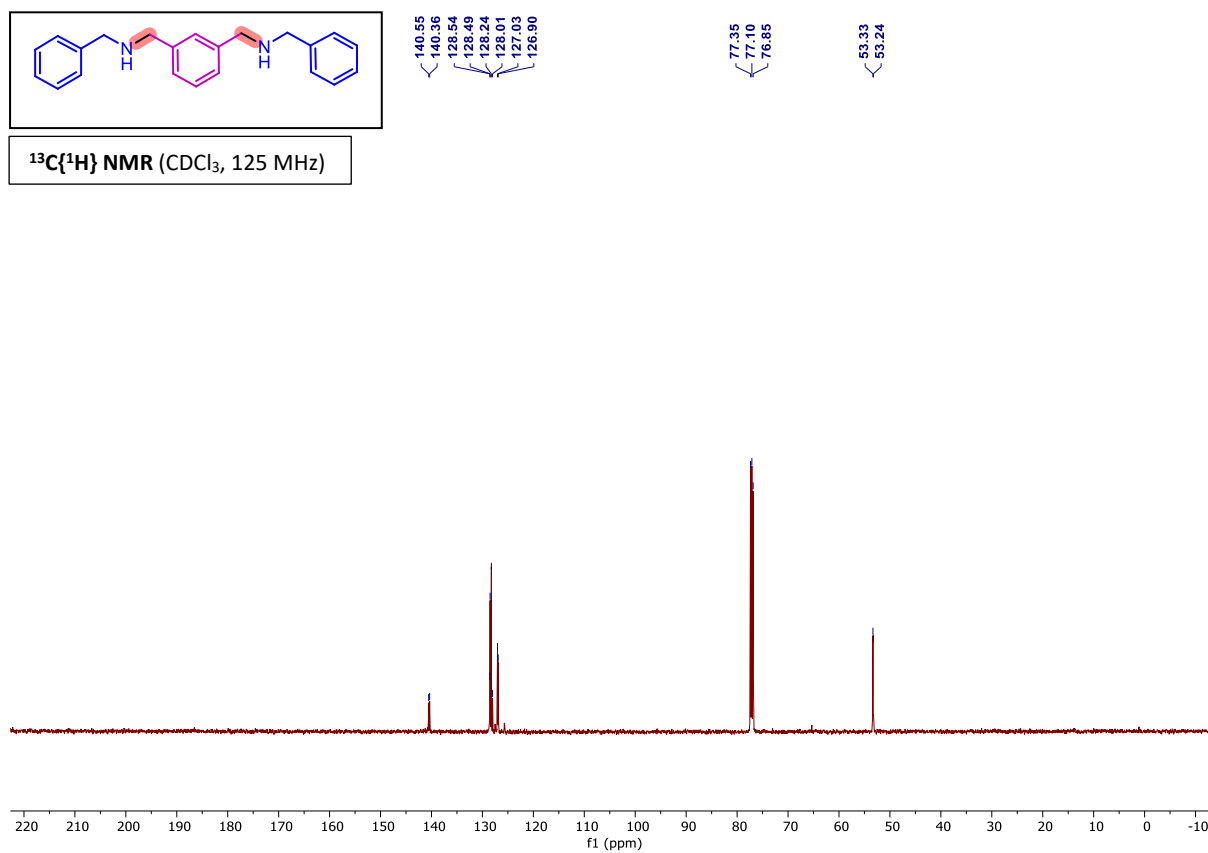

## References

1. M. Maji, K. Chakrabarti, D. Panja and S. Kundu, Sustainable synthesis of N-heterocycles in water using alcohols following the double dehydrogenation strategy, *J. Catal.*, 2019, **373**, 93-102.
2. M. Maji, I. Borthakur, S. Srivastava and S. Kundu, Regio-Selective C3- and N-Alkylation of Indolines in Water under Air Using Alcohols, *J Org Chem*, 2022, **87**, 5603-5616.
3. A. Sau, D. Panja, S. Dey, R. Kundu and S. Kundu, Selective reductive  $\alpha$ -methylation of chalcone derivatives using methanol, *J. Catal.*, 2022, **414**, 225-235.
4. N. Garg, H. P. Somasundharam, P. Dahiya and B. Sundararaju, Methanol as a hydrogen source: room-temperature highly-selective transfer hydrogenation of  $\alpha,\beta$ -unsaturated ketones, *Chem. commun.*, 2022, **58**, 9930-9933.
5. R. Bashary and G. L. J. B. c. Khatik, Design, and facile synthesis of 1,3 diaryl-3-(arylamino)propan-1-one derivatives as the potential alpha-amylase inhibitors and antioxidants, 2019, **82**, 156-162.
6. G. W. T. M.J. Frisch, H.B. Schlegel, G.E. Scuseria, M.A. Robb, J.R. Cheeseman, G., V. B.Scalmani, B. Mennucci, G.A. Petersson, H. Nakatsuji, M. Caricato, X. Li, H.P., A. F. I. Hratchian, J.Bloino, G. Zheng, J.L. Sonnenberg, M. Hada, M. Ehara, K. Toyota,, J. H. R. Fukuda, M. Ishida, T.Nakajima, Y. Honda, O. Kitao, H. Nakai, T. Vreven, J.A., J. E. P. Montgomery, F. Ogliaro, M.Bearpark, J.J. Heyd, E. Brothers, K.N. Kudin, V.N., R. K. Staroverov, J. Normand, K. Raghavachari,A. Rendell, J.C. Burant, S.S. Iyengar,, M. C. J. Tomasi, N. Rega, J.M. Millam, M. Klene, J.E. Knox,J.B. Cross, V. Bakken, C., J. J. Adamo, R. Gomperts, R.E. Stratmann, O. Yazyev, A.J. Austin, R.Cammi, C., J. W. O. Pomelli, R.L. Martin, K. Morokuma, V.G. Zakrzewski, G.A. Voth, P . Salvador,,S. D. J.J. Dannenberg, A.D. Daniels, Farkas, J.B. Foresman, J.V. Ortiz, J. Cioslowski, and D. J. Fox, inGaussian 09, Revision A.02, Gaussian, Inc., Wallingford CT, (2016).
7. Y. Zhao and D. G. Truhlar, The M06 suite of density functionals for main group thermochemistry, thermochemical kinetics, noncovalent interactions, excited states, and transition elements: two new functionals and systematic testing of four M06-class functionals and 12 other functionals, *Theor. Chem. Acc.*, 2008, **120**, 215-241.
8. W. J. Hehre, R. Ditchfield and J. A. Pople, Self—Consistent Molecular Orbital Methods. XII. Further Extensions of Gaussian—Type Basis Sets for Use in Molecular Orbital Studies of Organic Molecules, 1972, **56**, 2257-2261.
9. A. H. Aboo, R. Begum, L. Zhao, Z. H. Farooqi and J. Xiao, Methanol as hydrogen source: Chemoselective transfer hydrogenation of  $\alpha,\beta$ -unsaturated ketones with a rhodacycle, *Chinese J. Catal.*, 2019, **40**, 1795-1799.
10. M.-S. Abdallah, N. Joly, S. Gaillard, A. Poater and J.-L. Renaud, Blue-Light-Induced Iron-Catalyzed  $\alpha$ -Alkylation of Ketones, *Org. Lett.*, 2022, **24**, 5584-5589.
11. Y.-F. Liang, X.-F. Zhou, S.-Y. Tang, Y.-B. Huang, Y.-S. Feng and H.-J. Xu, Lithium tert-butoxide mediated  $\alpha$ -alkylation of ketones with primary alcohols under transition-metal-free conditions, *RSC Adv.*, 2013, **3**, 7739-7742.
12. J. Xu, H. Yue, S. Liu, H. Wang, Y. Du, C. Xu, W. Dong and C. Liu, Cu–Ag/hydrotalcite catalysts for dehydrogenative cross-coupling of primary and secondary benzylic alcohols, *RSC Adv.*, 2016, **6**, 24164-24174.
13. G. Zhang, J. Wu, H. Zeng, S. Zhang, Z. Yin and S. Zheng, Cobalt-Catalyzed  $\alpha$ -Alkylation of Ketones with Primary Alcohols, *Org. Lett.*, 2017, **19**, 1080-1083.
14. H.-X. Zheng, Z.-F. Xiao, C.-Z. Yao, Q.-Q. Li, X.-S. Ning, Y.-B. Kang and Y. Tang, Transition-Metal-Free Self-Hydrogen-Transferring Allylic Isomerization, *Org. Lett.*, 2015, **17**, 6102-6105.
15. X. Wang, F. Liu, Z. Yan, Q. Qiang, W. Huang and Z.-Q. Rong, Redox-Neutral Nickel-Catalyzed Cross-Coupling Reactions of (Homo)allylic Alcohols and Aryltriflates, *ACS catal.*, 2021, **11**, 7319-7326.

16. C. Meng, J. Xu, Y. Tang, Y. Ai and F. Li, The  $\alpha$ -alkylation of ketones with alcohols in pure water catalyzed by a water-soluble Cp\*Ir complex bearing a functional ligand, *New J. Chem.*, 2019, **43**, 14057-14065.
17. M. Vellakkaran, M. M. S. Andappan and N. Kommu, Replacing a stoichiometric silver oxidant with air: ligated Pd(ii)-catalysis to  $\beta$ -aryl carbonyl derivatives with improved chemoselectivity, *Green Chem.*, 2014, **16**, 2788-2797.
18. K. Nicholson, T. Langer and S. P. Thomas, Borane-Catalyzed, Chemoselective Reduction and Hydrofunctionalization of Enones Enabled by B–O Transborylation, *Org. Lett.*, 2021, **23**, 2498-2504.
19. S. Matsumoto, H. Marumoto, M. Akazome, Y. Otani and T. Kaiho, Chemoselective Reduction of  $\alpha,\beta$ -Unsaturated Carbonyl and Carboxylic Compounds by Hydrogen Iodide, 2021, **94**, 590-599.
20. Q. Jiang, T. Guo, Q. Wang, P. Wu and Z. Yu, Rhodium(I)-Catalyzed Arylation of  $\beta$ -Chloro Ketones and Related Derivatives through Domino Dehydrochlorination/ Conjugate Addition, 2013, **355**, 1874-1880.
21. A. B. Shabade, D. M. Sharma, P. Bajpai, R. G. Gonnade, K. Vanka and B. Punji, Room temperature chemoselective hydrogenation of C  $\checkmark$  C, C  $\checkmark$  O and C  $\checkmark$  N bonds by using a well-defined mixed donor Mn(i) pincer catalyst, *Chem. Sci.*, 2022, **13**, 13764-13773.
22. M.-J. Zhang, H.-X. Li, D. J. Young, H.-Y. Li and J.-P. Lang, Reaction condition controlled nickel(ii)-catalyzed C–C cross-coupling of alcohols, *Org. Biomol. Chem.*, 2019, **17**, 3567-3574.
23. J. R. Frost, C. B. Cheong, W. M. Akhtar, D. F. J. Caputo, N. G. Stevenson and T. J. Donohoe, Strategic Application and Transformation of ortho-Disubstituted Phenyl and Cyclopropyl Ketones To Expand the Scope of Hydrogen Borrowing Catalysis, *J. Am. Chem. Soc.*, 2015, **137**, 15664-15667.
24. B. Pandey, S. Xu and K. Ding, Selective Ketone Formations via Cobalt-Catalyzed  $\beta$ -Alkylation of Secondary Alcohols with Primary Alcohols, *Org. Lett.*, 2019, **21**, 7420-7423.
25. S. Mujahed, F. Valentini, S. Cohen, L. Vaccaro and D. Gelman, Polymer-Anchored Bifunctional Pincer Catalysts for Chemoselective Transfer Hydrogenation and Related Reactions, 2019, **12**, 4693-4699.
26. A. Joshi, S. Kumari and S. Kundu, Photoredox (NN)Mn(I) Catalysed Acceptorless Dehydrogenation: Synthesis of Amides, Aldehydes and Ketones, 2022, **364**, 4371-4383.
27. Q. Wang, H. Chai and Z. Yu, Acceptorless Dehydrogenation of N-Heterocycles and Secondary Alcohols by Ru(II)-NNC Complexes Bearing a Pyrazoyl-indolyl-pyridine Ligand, *Organometallics*, 2018, **37**, 584-591.
28. J. Brauer, E. Quraishi, L. M. Kammer and T. Opatz, Nickel-Mediated Photoreductive Cross Coupling of Carboxylic Acid Derivatives for Ketone Synthesis\*\*, 2021, **27**, 18168-18174.
29. C. Bayrak, A. Menzek and M. Sevim, Monodisperse NiPd alloy nanoparticles decorated on mesoporous graphitic carbon nitride as a catalyst for the highly efficient chemoselective reduction of  $\alpha,\beta$ -unsaturated ketone compounds, *New J. Chem.*, 2020, **44**, 13606-13612.
30. J. Das, M. Vellakkaran and D. J. T. J. o. o. c. Banerjee, Nickel-Catalyzed Alkylation of Ketone Enolates: Synthesis of Monoselective Linear Ketones, 2018, **84 2**, 769-779.
31. M. Iinuma, K. Moriyama and H. J. T. Togo, Various oxidative reactions with novel ion-supported (diacetoxyiodo)benzenes, 2013, **69**, 2961-2970.
32. T. Song, Z. Ma and Y. Yang, Chemoselective Hydrogenation of  $\alpha,\beta$ -Unsaturated Carbonyls Catalyzed by Biomass-Derived Cobalt Nanoparticles in Water, 2019, **11**, 1313-1319.
33. D. Meksuriyen and G. A. Cordell, Retrodihydrochalcones from *Dracaena Loureiri*, *J. Nat. Prod.*, 1988, **51**, 1129-1135.
34. T. Song, Z. Ma and Y. Yang, Chemoselective Hydrogenation of  $\alpha,\beta$ -Unsaturated Carbonyls Catalyzed by Biomass-Derived Cobalt Nanoparticles in Water, 2019, **11**, 1313-1319.

35. X. Wang, X. Wang, H. Pan, X. Ming, Z. Zhang and T. Wang, Palladium-Catalyzed Oxidative Nonclassical Heck Reaction of Arylhydrazines with Allylic Alcohols via C-N Bond Cleavage: Access to  $\beta$ -Arylated Carbonyl Compounds, *J Org Chem*, 2022, **87**, 10173-10184.
36. B. Kosjek, W. Stampfer, R. v. Deursen, K. Faber and W. Kroutil, Efficient production of raspberry ketone via 'green' biocatalytic oxidation, *Tetrahedron*, 2003, **59**, 9517-9521.
37. J. Shen, X. Zhu, Z. Wu, Y. Shi and T. Wen, Uvangoletin, extracted from *Sarcandra glabra*, exerts anticancer activity by inducing autophagy and apoptosis and inhibiting invasion and migration on hepatocellular carcinoma cells, *Phytomedicine*, 2022, **94**, 153793.
38. C. R. Elati, N. Kolla, S. Rao Chalamala, P. J. Vankawala, V. Sundaram, H. Vurimidi and V. T. Mathad, New Synthesis of Donepezil Through Palladium-Catalyzed Hydrogenation Approach, *Synth. Commun.*, 2006, **36**, 169-174.
39. C. S. Cho, B. T. Kim, H.-S. Kim, T.-J. Kim and S. C. Shim, Ruthenium-Catalyzed One-Pot  $\beta$ -Alkylation of Secondary Alcohols with Primary Alcohols, *Organometallics*, 2003, **22**, 3608-3610.
40. R. Martínez, D. J. Ramón and M. Yus, RuCl<sub>2</sub>(DMSO)<sub>4</sub> catalyzes the  $\beta$ -alkylation of secondary alcohols with primary alcohols through a hydrogen autotransfer process, *Tetrahedron*, 2006, **62**, 8982-8987.
41. S. Shee, B. Paul, D. Panja, B. C. Roy, K. Chakrabarti, K. Ganguli, A. Das, G. K. Das and S. Kundu, Tandem Cross Coupling Reaction of Alcohols for Sustainable Synthesis of  $\beta$ -Alkylated Secondary Alcohols and Flavan Derivatives, 2017, **359**, 3888-3893.
42. K. Z. C. Andrade and A. W. Silva, One-Step Reduction of Chalcones to Saturated Alcohols by Ammonium Formate/Palladium on Carbon: A Versatile Method, *Lett. Org. Chem.*, 2006, **3**, 39-41.
43. R. Babu, M. Subaramanian, S. P. Midya and E. Balaraman, Nickel-Catalyzed Guerbet Type Reaction: C-Alkylation of Secondary Alcohols via Double (de)Hydrogenation, *Org. Lett.*, 2021, **23**, 3320-3325.
44. R. E. Lutz and J. O. Weiss, The Effect of Configuration on the Reactivity of the Chalcone System<sup>1</sup>, *J. Am. Chem. Soc.*, 1955, **77**, 1814-1818.
45. T. Yildiz and A. Yusufoglu, Asymmetric synthesis of new chiral long chain alcohols, *Tetrahedron Asymmetry*, 2010, **21**, 2981-2987.
46. W. S. Mahoney and J. M. Stryker, Hydride-mediated homogeneous catalysis. Catalytic reduction of .alpha.,.beta.-unsaturated ketones using [(Ph<sub>3</sub>P)CuH]<sub>6</sub> and H<sub>2</sub>, *J. Am. Chem. Soc.*, 1989, **111**, 8818-8823.
47. T. T. Dang, B. Ramalingam, S. P. Shan and A. M. Seayad, An Efficient Palladium-Catalyzed N-Alkylation of Amines Using Primary and Secondary Alcohols, *ACS catal.*, 2013, **3**, 2536-2540.
48. O.-Y. Lee, K.-L. Law and D. Yang, Secondary Amine Formation from Reductive Amination of Carbonyl Compounds Promoted by Lewis Acid Using the InCl<sub>3</sub>/Et<sub>3</sub>SiH System, *Org. Lett.*, 2009, **11**, 3302-3305.
49. H. Wang, Q. Luo, W. Liu, Y. Lin, Q. Guan, X. Zheng, H. Pan, J. Zhu, Z. Sun, S. Wei, J. Yang and J. Lu, Quasi Pd<sub>1</sub>Ni single-atom surface alloy catalyst enables hydrogenation of nitriles to secondary amines, *Nat. Commun.*, 2019, **10**, 4998.
50. P. Veeraraghavan Ramachandran, P. D. Gagare, K. Sakavuyi and P. Clark, Reductive amination using ammonia borane, *Tetrahedron Lett.*, 2010, **51**, 3167-3169.
51. T. Schönauer, S. L. J. Thomä, L. Kaiser, M. Zobel and R. Kempe, General Synthesis of Secondary Alkylamines by Reductive Alkylation of Nitriles by Aldehydes and Ketones, 2021, **27**, 1609-1614.
52. N. Azizi, E. Akbari, A. K. Amiri and M. R. Saidi, Highly chemoselective reductive amination-coupling by one-pot reaction of aldehydes, HMDS and NaBH<sub>4</sub>, *Tetrahedron Lett.*, 2008, **49**, 6682-6684.

53. C. J. Smith, C. D. Smith, N. Nikbin, S. V. Ley and I. R. Baxendale, Flow synthesis of organic azides and the multistep synthesis of imines and amines using a new monolithic triphenylphosphine reagent, *Org. Biomol. Chem.*, 2011, **9**, 1927-1937.
54. K. M. Czerwinski, C. A. Zifcsak, J. Stevens, M. Oberbeck, C. Randlett, M. King and S. Mennen, An Improved Synthesis of Canthin-6-one, *Synth. Commun.*, 2003, **33**, 1225-1231.
55. V. Fasano and M. J. Ingleson, Expanding Water/Base Tolerant Frustrated Lewis Pair Chemistry to Alkylamines Enables Broad Scope Reductive Aminations, 2017, **23**, 2217-2224.
56. X. Long, Z. Li, G. Gao, P. Sun, J. Wang, B. Zhang, J. Zhong, Z. Jiang and F. Li, Graphitic phosphorus coordinated single Fe atoms for hydrogenative transformations, *Nat. Commun*, 2020, **11**, 4074.
